# Supplementary material
Source: PubMed Central journal article supplement (PMC5531277)

# Trifluoromethylation of Secondary Nitroalkanes

Amber A. S. Gietter-Burch,<sup>‡</sup> Vijayarajan Devannah,<sup>‡</sup> Donald A. Watson\*

*Department of Chemistry and Biochemistry, University of Delaware,*

*Newark, Delaware 19716*

## Supporting Information

| Index:                                                                                                             | Page |
|--------------------------------------------------------------------------------------------------------------------|------|
| 1. General Experimental Details                                                                                    | S2   |
| 2. Instrumentation and Chromatography                                                                              | S2   |
| 3. Screen of Additional Trifluoromethylating Reagents                                                              | S3   |
| 4. Screen of Solvents                                                                                              | S3   |
| 5. Synthesis of Novel Nitroalkane Starting Materials                                                               | S3   |
| 6. General Protocol for the Synthesis of $\alpha$ -Trifluoromethylnitroalkanes                                     | S7   |
| 7. Synthesis of Trifluoromethylnitroalkenes                                                                        | S13  |
| 8. Reduction of Trifluoromethylnitroalkanes into Trifluoromethylamines                                             | S15  |
| 9. Determination of Relative Stereochemistry of <b>S12</b>                                                         | S16  |
| 10. Crystal Data and Structure Refinement for <b>15</b> , <b>21</b> , <b>S12</b>                                   | S17  |
| 11. Deprotonation Studies                                                                                          | S18  |
| 12. Interaction of DBU with Umemoto's Reagent – <sup>1</sup> H NMR study                                           | S19  |
| 13. <sup>1</sup> H NMR monitoring of Trifluoromethylation of Secondary Nitroalkane                                 | S21  |
| 14. <sup>1</sup> H NMR monitoring of Trifluoromethylation of Secondary Nitroalkane<br>(Optimal reaction condition) | S23  |
| 15. References                                                                                                     | S25  |
| 16. Spectral Data                                                                                                  | S26  |

**1. General Experimental Details:** Benzene, diethyl ether, dichloromethane, and dioxane were dried on alumina according to a published procedure.<sup>1</sup> Copper bromide, sodium methoxide and sodium trimethylsilylanolate were purchased commercially; the bulk was stored in a N<sub>2</sub> filled glovebox; samples were removed from the glovebox and stored in a desiccator under air for up to two weeks prior to use. All hot glassware was oven dried for a minimum of two hours or flame-dried under vacuum prior to use. 4-nitrobutyl acetate,<sup>2</sup> methyl-4-nitrobutyrate,<sup>3</sup> *N,N*-dimethyl-4-nitrobutanamide,<sup>4</sup> (*E*)-*N*-((*Z*)-4-(2,6-dimethylphenylamino)pent-3-en-2-ylidene)-2,6-dimethylaniline,<sup>5</sup> 3-(*tert*-butyldimethylsilyloxy)-2,2-dimethylpropyl 2-bromopropanoate<sup>6</sup> 3-(*tert*-butyldimethylsilyloxy)-2,2-dimethylpropyl 2-methyl-3-nitropentanoate<sup>6</sup> 5-bromo-1-(*p*-toluenesulfonyl)-1H-indole,<sup>7</sup> benzyl-4-nitrobutanoate,<sup>8</sup> 1-bromo-4-(2-nitrobutyl)benzene,<sup>9</sup> *N*-(3,4-dichlorobenzyl)-2-ethyl-3-nitropentanamide,<sup>6</sup> *rac*-2-(4-trifluoromethylphenyl)-1-nitrocyclohexane,<sup>10</sup> 4-acetyl-(1-nitropropyl)benzene,<sup>11</sup> methyl 4-nitropentanoate,<sup>12</sup> 1-ethyl 6-methyl 3-nitro-2-propylhexanedioate,<sup>6</sup> ethyl-5-(*tert*-butoxycarbonylamino)-2,2-dimethyl-3-nitropentanoate,<sup>6</sup> *N*-methoxy-*N*,2-dimethyl-3-nitropentanamide,<sup>6</sup> 2-(2-nitrobutyl)pyridine,<sup>9</sup> and 2-(2-nitrobutyl)benzo[*d*]oxazole (**22**)<sup>9</sup> were synthesized according to published procedures. All other substrates and reagents were purchased in highest analytical purity from commercial suppliers and used as received. Reaction optimization (Table 1 and Table S.1 and S.2) was conducted on a 300 μmol scale in 17 x 60 mm vials with Teflon lined caps. All NMR yields and diastereoselectivity are reported using 1,3,5-trimethoxybenzene as an internal standard. All reactions were set up using standard Schlenk technique. Reactions were heated with stirring in temperature controlled oil baths and cooled with stirring using Cryo cooling units. "Double manifold" refers to a standard Schlenk-line gas manifold equipped with N<sub>2</sub> and vacuum (ca. 0.1 mm Hg).

**2. Instrumentation and Chromatography:** 400 MHz <sup>1</sup>H, 101 MHz <sup>13</sup>C, and 376 MHz <sup>19</sup>F spectra were obtained on a 400 MHz FT-NMR spectrometer equipped with a Bruker CryoPlatform. 600 MHz <sup>1</sup>H and 151 MHz <sup>13</sup>C spectra were obtained on a 600 MHz FTNMR spectrometer equipped with a Bruker SMART probe. <sup>13</sup>C spectra were recorded using Attached Proton Test phase pulse sequence; carbons with an odd number of protons are phased down and those with an even number of protons are phased up.<sup>13</sup> All samples were analyzed in the indicated deuterio-solvent and were recorded at ambient temperatures. Chemical shifts are reported in ppm. <sup>1</sup>H NMR spectra were calibrated using the residual protio-signal in deuterio-solvents as a standard. <sup>13</sup>C NMR spectra were calibrated using the deuterio-solvent as a standard. IR spectra were recorded on a Nicolet Magma-IR 560 FT-IR spectrometer as thin films on NaCl plates or using KBr pellets. Unless otherwise noted, column chromatography was performed with 40-63 μm silica gel with the eluent reported in parentheses. Where noted 5-20 μm silica gel was used to improve separation. Analytical thin-layer chromatography (TLC) was performed on precoated glass plates and visualized by UV or by staining with KMnO<sub>4</sub>. GCMS data was collected using an Agilent 6850 series GC and 5973 MS detector. Low resolution ESI data was collected on a Thermo LCQ Advantage running in positive ion mode. High resolution MS data was obtained on a Waters GCT Premier spectrometer using chemical ionization (CI) or liquid injection field desorption ionization (LIFDI) or on a Thermo Scientific, Q Exactive model orbitrap using electrospray ionization (ESI).

### 3. Screen of Additional Trifluoromethylation Sources

As shown in Table S1, additional trifluoromethylating reagents proved ineffective for the desired transformation.

**Table S1: Optimization of Trifluoromethylating Reagent**

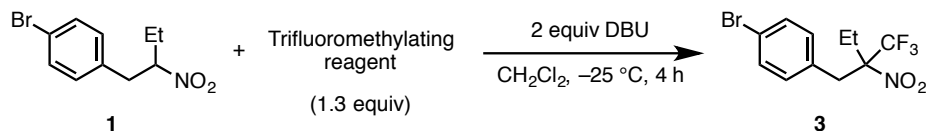

| Entry | Trifluoromethylating reagent | % Yield 3 <sup>a</sup> |
|-------|------------------------------|------------------------|
| 1     | TMSCF <sub>3</sub>           | 0                      |
| 2     | Togni's reagent              | 31                     |
| 3     | CF <sub>3</sub> I            | 45                     |
| 4     | Umemoto's reagent            | 90                     |

<sup>a</sup>Yield determined by <sup>1</sup>H NMR using 1,3,5-trimethoxybenzene as an internal standard.

### 4. Screen of Additional Solvents

As shown in Table S2, DCM found to be optimal solvent for the desired transformation

**Table S2: Optimization of Solvents**

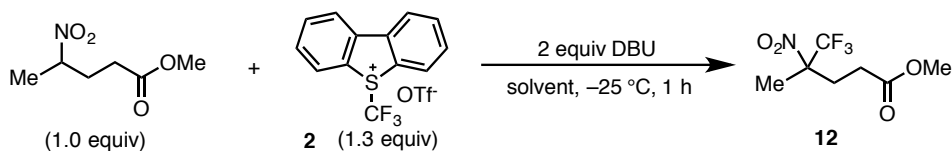

| Entry | Solvent | % Yield 12 <sup>a</sup> |
|-------|---------|-------------------------|
| 1     | benzene | 22                      |
| 2     | MeCN    | 36                      |
| 3     | DMF     | 45                      |
| 4     | DMA     | 47                      |
| 5     | DCM     | 72                      |

<sup>a</sup>Yield determined by <sup>1</sup>H NMR using 1,3,5-trimethoxybenzene as an internal standard.

### 5. Synthesis of Novel Nitroalkane Starting Materials:

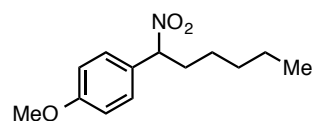

**(S1) S1** was synthesized by modification of a previously published procedure.<sup>11</sup> A hot 200 mL Schlenk equipped with a magnetic stir bar and a rubber septum was attached to a double manifold and allowed to cool. Once cool, the flask was backfilled with N<sub>2</sub>, the septum was removed and tris(dibenzylideneacetone)dipalladium(0) (129 mg, 141 μmol), BrettPhos (177 mg, 330 μmol), cesium carbonate (3.68 g, 11.3 mmol), and 4-bromoanisole (1.76 g, 9.42 mmol) were added. The septum was replaced, the flask was reattached to the double manifold and evacuated and backfilled with N<sub>2</sub> three times. Anhydrous dioxane (47 mL) and 1-nitrohexane (2.62 mL, 18.8 mmol) were added via syringe. The resulting heterogeneous solution was heated in an oil bath at 50 °C for 40 h. Once complete, the reaction was cooled to rt. Saturated NH<sub>4</sub>Cl (10 mL) was added and the reaction was stirred for 10 minutes. Another 10 mL saturated NH<sub>4</sub>Cl (10 mL) was added and the reaction was stirred for another 10 minutes.

The reaction was then diluted with diethyl ether (25 mL), washed twice with brine (25 mL), dried over magnesium sulfate and concentrated *in vacuo*. The crude reaction was purified using flash silica gel chromatography (65:35 hexanes : ethyl acetate) to afford **S1** (1.83 g, 82%) as a yellow oil:  $^1\text{H}$  NMR (400 MHz,  $\text{CDCl}_3$ )  $\delta$  7.40 (d,  $J$  = 8.7 Hz, 2H), 6.94 - 6.87 (m, 2H), 5.40 (dd,  $J$  = 8.6, 6.7 Hz, 1H), 3.81 (s, 3H), 2.51 - 2.38 (m, 1H), 2.05 (dt,  $J$  = 12.3, 6.5 Hz, 1H), 1.36 - 1.23 (m, 6H), 0.87 (t,  $J$  = 7.2 Hz, 3H);  $^{13}\text{C}$  NMR (101 MHz,  $\text{CDCl}_3$ )  $\delta$  160.7, 129.2, 126.9, 114.3, 91.2, 55.4, 33.8, 31.2, 25.8, 22.4, 14.0; FTIR ( $\text{cm}^{-1}$ ): 2957, 2860, 1550, 1253, 1179. HRMS (LIFDI)  $m/z$  calculated for  $[\text{C}_{13}\text{H}_{19}\text{NO}_3]^+$ : 237.1365; found: 237.1339.

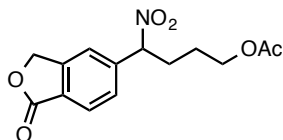

**(S2) S2** was synthesized by modification of a previously published procedure.<sup>11</sup> A hot 100 mL Schlenk equipped with a magnetic stir bar and a rubber septum was attached to a double manifold and allowed to cool. Once cool, the flask was backfilled with  $\text{N}_2$ , the septum was removed and tris(dibenzylideneacetone)dipalladium(0) (110 mg, 120  $\mu\text{mol}$ ), BrettPhos (147 mg, 280  $\mu\text{mol}$ ), cesium carbonate (3.13 g, 9.60 mmol), and 5-bromophthalide (1.70 g, 8.0 mmol). The septum was replaced, the flask was reattached to the double manifold and evacuated and backfilled with  $\text{N}_2$  three times. Anhydrous dioxane (30 mL) and nitroethane (855  $\mu\text{L}$ , 12.0 mmol) were added via syringe. The resulting heterogeneous solution was heated in an oil bath at 50  $^\circ\text{C}$  for 24 h. Once complete, the reaction was cooled to rt. Saturated  $\text{NH}_4\text{Cl}$  (10 mL) was added and the reaction was stirred for 10 minutes. Another 10 mL saturated  $\text{NH}_4\text{Cl}$  (10 mL) was added and the reaction was stirred for another 10 minutes. The reaction was then diluted with diethyl ether (25 mL), washed twice with brine (25 mL), dried over magnesium sulfate and concentrated *in vacuo*. The crude reaction was purified using flash silica gel chromatography (80:20 hexanes : ethyl acetate) to afford **S2** (757 mg, 32%) as a thick orange oil:  $^1\text{H}$  NMR (600 MHz,  $\text{CDCl}_3$ )  $\delta$  7.99 (d,  $J$  = 8.6 Hz, 1H), 7.64 (d,  $J$  = 7.3 Hz, 2H), 5.62 (dd,  $J$  = 9.1, 6.1 Hz, 1H), 5.36 (s, 2H), 4.19 - 4.08 (m, 2H), 2.68 - 2.58 (m, 1H), 2.23 - 2.13 (m, 1H), 2.06 (s, 3H), 1.78 - 1.63 (m, 2H);  $^{13}\text{C}$  NMR (101 MHz,  $\text{CDCl}_3$ )  $\delta$  171.1, 170.1, 147.5, 140.2, 129.0, 127.4, 126.7, 121.7, 90.4, 69.6, 63.0, 31.0, 25.4, 21.0; FTIR ( $\text{cm}^{-1}$ ): 2961, 1780, 1767, 1553, 1245, 1050; HRMS (LIFDI)  $m/z$  calculated for  $[\text{C}_{14}\text{H}_{16}\text{NO}_6]^+$ : 294.0978; found: 294.0983.

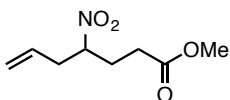

**(S3) S3** was synthesized by modification of a previously published procedure.<sup>14</sup> A hot 100 mL Schlenk equipped with a magnetic stir bar and a rubber septum was attached to a double manifold and allowed to cool. Once cool, the flask was backfilled with  $\text{N}_2$ , the septum was removed and bis(triphenylphosphine)palladium (II) chloride (386 mg, 550  $\mu\text{mol}$ ) and sodium methoxide (1.19 g, 22.0 mmol) were added. The septum was replaced, the flask was reattached to the double manifold and evacuated and backfilled with  $\text{N}_2$  three times. Anhydrous methanol (22 mL) and methyl 4-nitrobutanoate (2.56 mL, 20.0 mmol) were added via syringe. The resulting yellow suspension was heated in an oil bath at 65  $^\circ\text{C}$  for 5 min, during which time the suspension turned brown. The reaction was cooled to rt and transferred to pre-cooled bath at 15  $^\circ\text{C}$ . allyl acetate (4.32 mL, 40 mmol) was added via syringe and the reaction was allowed to stir at 15  $^\circ\text{C}$  for 24 h. Once complete, the reaction was warmed to rt. The reaction was then diluted with diethyl ether (40 mL), washed thrice with brine (30 mL), dried over magnesium sulfate and concentrated *in vacuo*. The crude reaction was purified using flash silica gel chromatography (100:0  $\rightarrow$  95:5 hexanes : ethyl acetate) to afford **(S3)** (552 mg, 15%) as a clear oil:  $^1\text{H}$  NMR (400 MHz,  $\text{CDCl}_3$ )  $\delta$  5.78 - 5.63 (m, 1H), 5.20 - 5.16 (m, 1H), 5.15 (s, 1H), 4.67 - 4.57 (m, 1H), 3.69 (s, 3H), 2.77 - 2.64 (m, 1H), 2.60 - 2.48 (m, 1H), 2.49 - 2.29 (m, 2H), 2.30 - 2.18 (m, 2H);  $^{13}\text{C}$  NMR (151 MHz,  $\text{CDCl}_3$ )  $\delta$  172.4, 131.2, 119.9, 87.0, 52.0, 38.0, 30.0, 28.1; FTIR ( $\text{cm}^{-1}$ ): 2954, 2918, 2849, 1734, 1654, 1558, 993, 927 ; GC/MS (EI) 156.1 (M-OCH<sub>3</sub>)<sup>+</sup>. HRMS (CI)  $m/z$  calculated for  $[\text{C}_8\text{H}_{14}\text{NO}_4]^+$ : 188.0923; found: 188.0917.

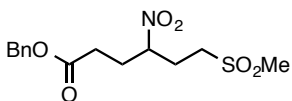

**(S4)** To a 50 mL round bottom equipped with a magnetic stir bar was added benzyl- $\gamma$ -nitrobutanoate (2.63 g, 12.7 mmol), dichloromethane (2.5 mL), water (21 mL), methyl vinyl sulfone (1.06 mL, 12.7 mmol) and sodium hydroxide (61.0  $\mu\text{g}$ , 1.52 mmol). The biphasic reaction was vigorously stirred at room temperature for 4 days. Dichloromethane (20 mL) was added and the aqueous layer was extracted with dichloromethane (10 mL). The organic layers were combined, dried with magnesium sulfate and concentrated *in vacuo*. The crude reaction was purified using flash silica gel chromatography (70:30

benzene : ethyl acetate) to afford **S4** (513 mg, 12%) as a pale yellow solid:  $^1\text{H}$  NMR (400 MHz,  $\text{CDCl}_3$ )  $\delta$  7.41 - 7.31 (m, 5H), 5.13 (s, 2H), 4.83 - 4.70 (m, 1H), 3.05 (t,  $J = 7.7$  Hz, 2H), 2.94 (s, 3H), 2.56 - 2.42 (m, 3H), 2.42 - 2.24 (m, 2H), 2.23 - 2.12 (m, 1H);  $^{13}\text{C}$  NMR (101 MHz,  $\text{CDCl}_3$ )  $\delta$  171.5, 135.5, 128.8, 128.6, 128.5, 85.5, 67.0, 50.7, 41.3, 30.0, 28.7, 26.0; FTIR ( $\text{cm}^{-1}$ ): 2931, 1733, 1550, 1299, 1133; mp = 68-69  $^\circ\text{C}$ . ESI-MS: 352.3 ( $\text{M}+\text{Na}$ ) $^+$  HRMS (ESI)  $m/z$  calculated for  $[\text{C}_{14}\text{H}_{20}\text{NO}_6\text{S}]^+$ : 330.10058; found: 330.09975.

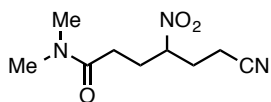

**(S5)** To a 200 mL round bottom flask equipped with a magnetic stir bar was added *N,N*-dimethyl-4-nitrobutanamide (5.23 mL, 40.0 mmol), acrylonitrile (2.62 mL, 40.0 mmol), dichloromethane (8 mL), sodium hydroxide (192 mg, 4.80 mmol), and water (67 mL). The flask was sealed with a polypropylene cap and

stirred at room temperature for 42 h. The reaction was then diluted with dichloromethane (20 mL) and the organic layer was separated. The aqueous layer was extracted with dichloromethane (20 mL), dried over magnesium sulfate, and concentrated *in vacuo*. The crude reaction was purified using flash silica gel chromatography (18:80:2 hexanes : ethyl acetate : triethylamine) to afford **S5** (1.65 g, 19%) as a white solid:  $^1\text{H}$  NMR (400 MHz,  $\text{CDCl}_3$ )  $\delta$  4.74 (tt,  $J = 8.7, 4.4$  Hz, 1H), 2.96 (d,  $J = 6.4$  Hz, 6H), 2.50 - 2.33 (m, 5H), 2.28 - 2.12 (m, 3H);  $^{13}\text{C}$  NMR (101 MHz,  $\text{CDCl}_3$ )  $\delta$  170.3, 117.9, 86.4, 37.1, 35.7, 29.6, 28.9, 28.8, 14.4; FTIR ( $\text{cm}^{-1}$ ): 2938, 2248, 1645, 1550, 1150; mp = 53-55  $^\circ\text{C}$ ; GC/MS (EI) 167.1 ( $\text{M}-\text{NO}_2$ ) $^+$ . HRMS (CI)  $m/z$  calculated for  $[\text{C}_9\text{H}_{16}\text{N}_3\text{O}_3]^+$ : 214.1192; found: 214.1192.

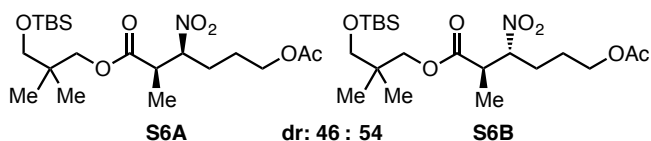

**(S6)** A hot 50 mL Schlenk equipped with a magnetic stir bar and a rubber septum was attached to a double manifold and cooled under vacuum.<sup>6</sup> Once cool, the septum was removed and CuBr (84.3 mg, 588  $\mu\text{mol}$ ), (*E*)-*N*-((*Z*)-4-

(2,6-dimethylphenylamino)pent-3-en-2-ylidene)-2,6-dimethylaniline (180 mg, 588  $\mu\text{mol}$ ), and sodium trimethylsilylanolate (429 mg, 3.82 mmol) were added. The septum was replaced and backfilled with  $\text{N}_2$  three times. Anhydrous benzene (17 mL), 4-nitrobutyl acetate (663 mg, 4.12 mmol), and 3-(*tert*-butyldimethylsilyloxy)-2,2-dimethylpropyl 2-bromopropanoate (1.04 g, 2.91 mmol) were added via syringe. The reaction was heated to 60  $^\circ\text{C}$  with rapid stirring for 48 h. Once completed, the reaction was cooled to room temperature, the septum was removed and the reaction mixture was diluted with diethyl ether (50 mL). The crude reaction mixture was filtered through a plug of magnesium sulfate and concentrated *in vacuo*. NMR analysis revealed a 46:54 mixture of syn and anti isomers. The crude reaction was purified by flash silica chromatography (90:10:1 hexanes : ethyl acetate : acetic acid) to afford a mixture of diastereomers of  $\beta$ -nitroester **S6** (760 mg, 60%) as a yellow oil:  $^1\text{H}$  NMR (600 MHz,  $\text{CDCl}_3$ : mixture of diastereomers; useful diagnostic peaks for each compound are listed. See attached spectra for details)  $\delta$  **S6A**: 4.69 (ddd,  $J = 10.6, 9.2, 3.2$  Hz, 1H), 2.99 (dq,  $J = 9.0, 7.0$  Hz, 1H), 1.87 - 1.80 (m, 1H); **S6B**: 4.77 (td,  $J = 8.9, 3.6$  Hz, 1H), 3.19 (p,  $J = 7.4$  Hz, 1H);  $^{13}\text{C}$  NMR (101 MHz,  $\text{CDCl}_3$ )  $\delta$  **S6A**: 172.2, 89.8, 68.4, 63.2, 43.8, 29.0, 25.3, 21.6, 14.7; **S6B**: 172.5, 88.1, 68.5, 63.3, 42.5, 27.1, 24.8, 21.5, 13.5; FTIR ( $\text{cm}^{-1}$ ): 2956, 1741, 1555, 1248, 1099, 776; GC/MS (EI) 376.3 ( $\text{M}-\text{C}_4\text{H}_9$ ) $^+$ ; 329.1 ( $\text{M}-\text{C}_4\text{H}_{10}\text{NO}_2$ ) $^+$ . HRMS (CI)  $m/z$ , calculated for  $[\text{C}_{20}\text{H}_{40}\text{NO}_7\text{Si}]^+$ : 434.2574; found: 434.2575 and 434.2573.

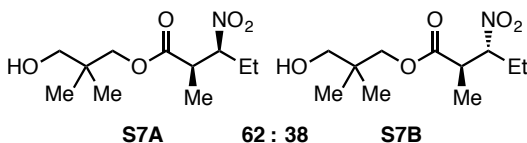

**(S7)** To a 500 mL round bottom flask with a stir bar was added 3-(*tert*-butyldimethylsilyloxy)-2,2-dimethylpropyl 2-methyl-3-nitropentanoate (800 mg, 2.22 mmol), THF (74 mL), and 3M HCl (55 mL). The flask was sealed with a polyethylene stopper and stirred vigorously at rt for 4.5 h.

Once complete, the reaction was diluted with brine (20 mL) and extracted with ethyl acetate (3x, 35 mL). The organic layers were combined, washed with brine (1x, 20 mL), dried with magnesium sulfate, and concentrated *in vacuo*. NMR analysis revealed a 62:38 mixture of syn and anti isomers. The crude reaction was purified by flash silica chromatography (60:40 hexanes: ethyl acetate) to afford alcohol **S7** (463 mg, 84%) as a clear oil:  $^1\text{H}$  NMR (600 MHz,  $\text{CDCl}_3$ : mixture of diastereomers; useful diagnostic peaks for each compound are listed. See attached spectra for details)  $\delta$  **S7A**: 3.05 - 2.96 (m, 1H), 0.93 (s, 6H); **S7B**: 3.20 (dq,  $J = 9.1, 7.3$  Hz, 1H), 0.91 (apparent d, 6H);  $^{13}\text{C}$  NMR (101 MHz,  $\text{CDCl}_3$ )  $\delta$  **S7A**: 173.0, 91.5, 68.2, 43.5, 36.5, 25.5, 14.4, 10.6; **S7B**: 173.7, 89.8, 68.1, 42.0, 36.6, 24.0, 13.9, 9.5; FTIR ( $\text{cm}^{-1}$ ):

3446, 2971, 1734, 1552, 1375; ESI-MS: 270.2 (M+Na)<sup>+</sup>; HRMS (ESI) m/z, calculated for [C<sub>11</sub>H<sub>22</sub>NO<sub>5</sub>]<sup>+</sup>: 248.14925; found: 248.14849.

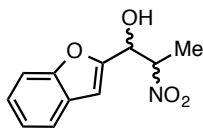

**(S8)** To a 100 mL round bottom flask equipped with a magnetic stir bar was added 2-benzofurancarboxaldehyde (4.15 mL, 34.2 mmol) and nitroethane (24.4 mL, 342 mmol). The reaction was cooled to 0 °C in an ice bath and tetramethylguanidine (216 μL, 1.71 mmol) was added dropwise via syringe. Once the addition was complete, the ice bath was removed and the flask was allowed to warm to rt where it was stirred for 12 h. The crude reaction was transferred to a separatory funnel and diluted with brine (15 mL). The reaction was acidified with 5% HCl. The aqueous layer was extracted with ethyl acetate. The organic layer was dried with magnesium sulfate and concentrated *in vacuo*. NMR analysis revealed a 63:37 mixture of isomers. The crude reaction was purified via flash silica gel chromatography (93:7 hexanes : ethyl acetate) to afford α-nitroalcohol **S8** (6.60 g, 87%) as a yellow solid: <sup>1</sup>H NMR (400 MHz, CDCl<sub>3</sub>: mixture of diastereomers; useful diagnostic peaks for each compound are listed. See attached spectra for details) δ **S8** (major): 6.81 (s, 1H), 5.22 (dd, *J* = 8.5, 6.2 Hz, 1H), 5.14 - 5.05 (m, 1H), 2.81 (d, *J* = 6.2 Hz, 1H), 1.49 (d, *J* = 6.8 Hz, 3H); **S8** (minor): 6.80 (s, 1H), 5.57 (t, *J* = 4.2 Hz, 1H), 5.01 (qd, *J* = 6.9, 3.6 Hz, 1H), 2.89 (d, *J* = 5.3 Hz, 1H), 1.62 (d, *J* = 6.9 Hz, 3H); <sup>13</sup>C NMR (101 MHz, CDCl<sub>3</sub>) δ **S8** (major): 155.1, 153.1, 127.5, 125.4, 123.5, 121.6, 111.7, 106.4, 86.1, 70.2, 16.5; **S8** (minor): 155.0, 153.8, 127.7, 124.9, 121.5, 123.4, 111.5, 105.1, 84.7, 69.3, 12.9; FTIR (cm<sup>-1</sup>): 3508, 3066, 2993, 1553, 1454, 753; mp = 68-70 °C; GC/MS (EI) retention time = 11.566, 174.0 (M-HNO<sub>2</sub>)<sup>+</sup>; retention time = 11.633, 173.9 (M-HNO<sub>2</sub>)<sup>+</sup>. HRMS (CI) m/z, calculated for [C<sub>11</sub>H<sub>12</sub>NO<sub>4</sub>]<sup>+</sup>: 222.0766; found: 222.0759 and 222.0755.

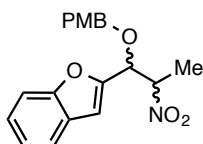

**(S9)** A hot 100 mL round bottom flask equipped with a magnetic stir bar and a septum was attached to a double manifold and allowed to cool. Once cooled, the flask was backfilled with N<sub>2</sub>, septum was removed and **S8** (2.00 g, 9.00 mmol) was added. The septum was replaced, the flask was reattached to the double manifold and evacuated and backfilled with N<sub>2</sub> three times. Anhydrous diethyl ether (45 mL) and 4-methoxybenzyl-2,2,2-trichloroacetimidate (3.33 g, 11.8 mmol) were added via syringe. The reaction was stirred for five minutes then trimethylsilyl trifluoromethanesulfonate (90.0 μL, 494 μmol) was added dropwise via syringe. Once addition was complete, the reaction was stirred at rt for 20 h. Once complete, the reaction was washed with NaHCO<sub>3</sub> (2x, 15 mL), 1M HCl (1x, 15 mL), and brine (1x, 15 mL). The reaction was dried with magnesium sulfate and concentrated *in vacuo*. NMR analysis revealed a 79:21 mixture of isomers. The crude reaction was purified via flash silica chromatography (95:5 hexanes : ethyl acetate) to afford **S9** (358 mg, 12%) as a yellow solid: <sup>1</sup>H NMR (400 MHz, CDCl<sub>3</sub>: mixture of diastereomers; useful diagnostic peaks for each compound are listed. See attached spectra for details) δ **S9 Major**: 4.53 (d, *J* = 11.4 Hz, 1H), 4.30 (d, *J* = 11.4 Hz, 1H), 3.79 (s, 3H), 1.36 (d, *J* = 6.8 Hz, 3H); **S9 Minor**: 4.63 (d, *J* = 11.3 Hz, 1H), 4.39 (d, *J* = 11.3 Hz, 1H), 3.81 (s, 3H), 1.65 (d, *J* = 6.8 Hz, 3H); <sup>13</sup>C NMR (101 MHz, CDCl<sub>3</sub>) δ **S9 Major**: 159.6, 155.5, 151.2, 129.8, 128.6, 127.5, 125.4, 123.4, 121.5, 113.9, 111.8, 108.5, 85.3, 75.5, 71.0, 55.4, 16.4; **S9 Minor**: 159.7, 155.3, 152.5, 129.9, 128.8, 127.7, 125.0, 123.3, 121.5, 114.0, 111.7, 106.8, 84.4, 74.9, 71.8, 55.4, 13.7; FTIR (cm<sup>-1</sup>): 2937, 2837, 1556, 1251, 1175; mp: 72-74 °C; GC/MS (EI) 235.0 (M-C<sub>7</sub>H<sub>7</sub>O)<sup>+</sup>; 234.9 (M-C<sub>7</sub>H<sub>7</sub>O)<sup>+</sup>. HRMS (LIFDI) m/z, calculated for [C<sub>19</sub>H<sub>19</sub>NO<sub>5</sub>]<sup>+</sup>: 341.1263; found: 341.1247.

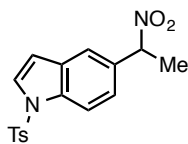

**(S10)** **S10** was synthesized by modification of a previously published procedure.<sup>11</sup> A hot 100 mL Schlenk equipped with a magnetic stir bar and a rubber septum was attached to a double manifold and allowed to cool. Once cool, the flask was backfilled with N<sub>2</sub>, the septum was removed and tris(dibenzylideneacetone)dipalladium(0) (82.0 mg, 90.0 μmol), BrettPhos (110 mg, 210 μmol), cesium carbonate (2.35 g, 7.20 mmol), and 5-bromo-1-(*p*-toluenesulfonyl)-1H-indole (2.09 g, 6.00 mmol). The septum was replaced, the flask was reattached to the double manifold and evacuated and backfilled with N<sub>2</sub> three times. Anhydrous dioxane (40 mL) and 4-nitrobutyl acetate (2.58 g, 16.0 mmol) were added via syringe. The resulting heterogeneous solution was heated in an oil bath at 50 °C for 24 h. Once complete, the reaction was cooled to rt. Saturated NH<sub>4</sub>Cl (10 mL) was added and the reaction was stirred for 10 minutes. Another 10 mL saturated NH<sub>4</sub>Cl (10 mL) was added and the reaction was stirred for another 10 minutes. The reaction was then diluted with diethyl ether (25 mL), washed twice with brine (25 mL), dried over magnesium

sulfate and concentrated *in vacuo*. The crude reaction was purified using flash silica gel chromatography (65:35 hexanes : ethyl acetate) to afford **S10** (911 mg, 44%) as a thick yellow oil:  $^1\text{H}$  NMR (400 MHz,  $\text{CDCl}_3$ )  $\delta$  7.99 (d,  $J$  = 8.6 Hz, 1H), 7.76 (d,  $J$  = 8.4 Hz, 2H), 7.63 (dd,  $J$  = 14.3, 2.6 Hz, 2H), 7.40 (dd,  $J$  = 8.7, 1.7 Hz, 1H), 7.24 (d,  $J$  = 8.1 Hz, 2H), 6.67 (d,  $J$  = 3.7 Hz, 1H), 5.68 (q,  $J$  = 6.9 Hz, 1H), 2.35 (s, 3H), 1.92 (d,  $J$  = 7.0 Hz, 3H);  $^{13}\text{C}$  NMR (101 MHz,  $\text{CDCl}_3$ )  $\delta$  145.5, 135.4, 135.1, 131.1, 130.7, 130.2, 127.6, 127.0, 123.9, 120.8, 114.1, 109.0, 86.4, 21.8, 19.7; FTIR ( $\text{cm}^{-1}$ ): 3144, 2989, 1550, 1373, 1175; HRMS (LIFDI)  $m/z$  calculated for  $[\text{C}_{17}\text{H}_{16}\text{N}_2\text{O}_4\text{S}]^+$ : 344.0831; found: 344.0845.

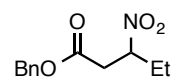 **(25)** A hot 150 mL high-pressure reaction vessel equipped with a magnetic stir bar and a Teflon cap and a Kontes cap was attached to a double manifold and cooled under vacuum. Once cool, the flask was backfilled with  $\text{N}_2$ , the Teflon cap was removed, and  $\text{CuBr}$  (940 mg, 6.55 mmol), (*E*)-*N*-((*Z*)-4-(2,6-dimethylphenylamino)pent-3-en-2-ylidene)-2,6-dimethylaniline (2.00 g, 6.55 mmol), and sodium trimethylsilylanolate (2.06 g, 18.3 mmol) were added. The Teflon cap was replaced, the flask was attached to a double manifold, and evacuated and backfilled with  $\text{N}_2$  five times. The Kontes cap was removed and replaced with a rubber septum, and anhydrous dichloromethane (77 mL), 1-nitropropane (1.52 mL, 17.0 mmol) and benzyl bromoacetate (2.10 mL, 13.1 mmol) were added via syringe. The Kontes cap was replaced and the resulting heterogeneous solution was submerged in an oil bath. The reaction was heated at 60 °C with rapid stirring for 21 h. Once completed, the reaction was cooled to room temperature, the septum was removed and the reaction mixture was diluted with diethyl ether (50 mL). The crude reaction mixture was filtered through a plug of Celite and concentrated *in vacuo*. The crude reaction was purified by silica gel flash chromatography (82:15:3 hexanes : benzene : ethyl acetate) to afford  $\beta$ -nitroester **S11** (1.23 g, 40%) as a yellow oil:  $^1\text{H}$  NMR (600 MHz,  $\text{CDCl}_3$ )  $\delta$  7.40 - 7.32 (m, 5H), 5.15 (s, 2H), 4.86 (dddd,  $J$  = 9.8, 7.5, 5.7, 4.5 Hz, 1H), 3.20 (dd,  $J$  = 17.3, 9.4 Hz, 1H), 2.73 (dd,  $J$  = 17.4, 4.3 Hz, 1H), 2.04 - 1.89 (m, 2H), 0.99 (t,  $J$  = 7.4 Hz, 3H);  $^{13}\text{C}$  NMR (101 MHz,  $\text{CDCl}_3$ )  $\delta$  169.3, 135.3, 128.8, 128.7, 128.5, 84.4, 67.3, 36.8, 27.2, 10.0; FTIR ( $\text{cm}^{-1}$ ): 3066, 2975, 2883, 1738, 1552; GC/MS (EI) 107.0 ( $\text{M}-\text{C}_5\text{H}_8\text{NO}_3$ ) $^+$ . HRMS (CI)  $m/z$  calculated for  $[\text{C}_{12}\text{H}_{16}\text{NO}_4]^+$ : 238.1079; found: 238.1072.

## 6. General Protocol for the Synthesis of $\alpha$ -Trifluoromethylnitroalkanes:

**General Protocol A: Synthesis of  $\alpha$ -Trifluoromethylnitroalkanes:** A hot 25 mL round bottom flask equipped with a magnetic stir bar and a rubber septum was attached via needle to a double manifold and cooled under vacuum. Once cooled, the flask was backfilled with  $\text{N}_2$ , the septum was removed, and nitroalkane (1 equiv) and 5-(trifluoromethyl)dibenzothiophenium trifluoromethanesulfonate (Umemoto's reagent, **2**, 1.3 equiv) were added. The septum was replaced, the flask was reattached to a double manifold and evacuated and backfilled with  $\text{N}_2$  three times. Anhydrous dichloromethane was added via syringe and the flask was lowered into a precooled  $-25$  °C cooling bath and stirred. 1,8-Diazabicycloundec-7-ene (DBU, 2 equiv) was then added dropwise via syringe. The resulting homogeneous solution was stirred at  $-25$  °C for 4 h after which the flask was removed from the cooling unit and the septum was removed. The reaction mixture was washed with brine (1x), dried over magnesium sulfate, and concentrated *in vacuo* onto Celite. The product was purified by silica gel flash chromatography.

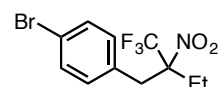 **(3)** According to general protocol A: 1-bromo-4-(2-nitrobutyl)benzene (257 mg, 1.00 mmol), Umemoto's reagent **2** (523 mg, 1.30 mmol) and anhydrous dichloromethane (10 mL) were combined under  $\text{N}_2$  and cooled to  $-25$  °C. DBU (299  $\mu\text{L}$ , 2.00 mmol) was added dropwise and the reaction was stirred at  $-25$  °C for 4 h. The reaction was worked up according to the general protocol and purified by flash silica gel chromatography (100:0  $\rightarrow$  99:1 hexanes : ethyl acetate) to afford  $\alpha$ -trifluoromethylnitroalkane **3** (270 mg, 83%) as a clear oil:  $^1\text{H}$  NMR (600 MHz,  $\text{CDCl}_3$ )  $\delta$  7.45 (d,  $J$  = 8.3 Hz, 2H), 7.01 (d,  $J$  = 8.3 Hz, 2H), 3.51 (d,  $J$  = 14.7 Hz, 1H), 3.34 (d,  $J$  = 14.7 Hz, 1H), 2.22 (dq,  $J$  = 15.9, 8.4 Hz, 1H), 2.05 (dq,  $J$  = 14.8, 7.3 Hz, 1H), 1.08 (t,  $J$  = 7.4 Hz, 3H);  $^{13}\text{C}$  NMR (151 MHz,  $\text{CDCl}_3$ )  $\delta$  132.1, 132.0, 131.0, 122.6, 123.2 (q,  $J$  = 286 Hz), 94.3 (q,  $J$  = 25.9 Hz), 38.9, 26.1, 8.3;  $^{19}\text{F}$  NMR (565 MHz,  $\text{CDCl}_3$ )  $\delta$  -69.5; FTIR ( $\text{cm}^{-1}$ ): 2987, 2957, 1561, 1490, 1195, 839, 812; GC/MS (EI) 278.0 ( $\text{M}-\text{NO}_2$ ) $^+$ . HRMS (CI)  $m/z$  calculated for  $[\text{C}_{11}\text{H}_{11}\text{NO}_2\text{BrF}_3]^+$ : 324.9925; found: 324.9930.

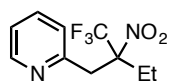

**(4)** According to general protocol A: 2-(2-Nitrobutyl)pyridine (180 mg, 1.00 mmol), Umemoto's reagent **2** (532 mg, 1.30 mmol), and anhydrous dichloromethane (10 mL) were combined under N<sub>2</sub> and cooled to -25 °C. DBU (299 μL, 2.00 mmol) was added dropwise and the reaction was stirred at -25 °C for 4 h. The reaction was worked up according to the general protocol and purified by flash silica gel chromatography (75:25 hexanes : ethyl acetate). A second column (50:50 hexanes : ethyl acetate) to remove trace dibenzothiophene afforded α-trifluoromethylnitroalkane **4** (158 mg, 64%) as a orange oil: <sup>1</sup>H NMR (600 MHz, CDCl<sub>3</sub>) δ 8.55 - 8.51 (m, 1H), 7.64 (td, *J* = 7.7, 1.8 Hz, 1H), 7.20 (dd, *J* = 7.1, 5.3 Hz, 1H), 7.16 (d, *J* = 7.8 Hz, 1H), 3.83 (d, *J* = 14.8 Hz, 1H), 3.53 (d, *J* = 14.8 Hz, 1H), 2.41 - 2.26 (m, 2H), 1.10 - 1.06 (m, 3H); <sup>13</sup>C NMR (101 MHz, CDCl<sub>3</sub>) δ 153.3, 149.6, 136.8, 124.8, 123.8 (q, *J* = 288 Hz), 122.8, 94.0 (q, *J* = 26.3 Hz), 39.6, 25.1, 8.6; <sup>19</sup>F NMR (565 MHz, CDCl<sub>3</sub>) δ -71.3; FTIR (cm<sup>-1</sup>): 2986, 2955, 1563, 1439, 1241, 1186; GC/MS (EI) 202.1 (M-NO<sub>2</sub>)<sup>+</sup>. HRMS (CI) *m/z* calculated for [C<sub>10</sub>H<sub>12</sub>N<sub>2</sub>O<sub>2</sub>F<sub>3</sub>]<sup>+</sup>: 249.0851; found: 249.0850.

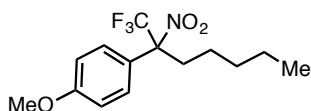

**(5)** According to general protocol A: **S1** (237 mg, 1.00 mmol), Umemoto's reagent **2** (523 mg, 1.30 mmol), and anhydrous dichloromethane (10 mL) were combined under N<sub>2</sub> and cooled to -25 °C. DBU (299 μL, 2.00 mmol) was added dropwise and the reaction was stirred at -25 °C for 4 h. The reaction was worked up according to the general protocol and purified by flash silica gel chromatography (90:10 petroleum ether : benzene) to afford α-trifluoromethylnitroalkane **5** (263 mg, 86%) as a clear oil: <sup>1</sup>H NMR (600 MHz, C<sub>6</sub>D<sub>6</sub>) δ 7.03 (d, *J* = 8.8 Hz, 2H), 6.54 (d, *J* = 9.0 Hz, 2H), 3.16 (s, 3H), 2.41 - 2.30 (m, 2H), 1.43 (m, 1H), 1.31 (m, 1H), 1.09 - 0.96 (m, 4H), 0.75 (t, *J* = 7.2 Hz, 3H); <sup>13</sup>C NMR (101 MHz, CDCl<sub>3</sub>) δ 160.7, 128.6, 123.8, 123.0 (q, *J* = 286 Hz), 114.2, 96.3 (q, *J* = 27.3 Hz), 55.5, 34.5, 31.9, 23.6, 22.3, 14.0; <sup>19</sup>F NMR (565 MHz, CDCl<sub>3</sub>) δ -69.2; FTIR (cm<sup>-1</sup>): 2960, 1563, 1518, 1263, 1180, 832. HRMS (LIFDI) *m/z* calculated for [C<sub>14</sub>H<sub>18</sub>NO<sub>3</sub>F<sub>3</sub>]<sup>+</sup>: 305.1239; found: 305.1242.

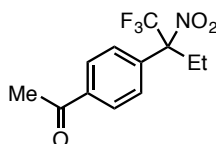

**(6)** According to general protocol A: 4-Acetyl-(1-nitropropyl)benzene (207 mg, 1.00 mmol), Umemoto's reagent **2** (532 mg, 1.30 mmol), and anhydrous dichloromethane (10 mL) were combined under N<sub>2</sub> and cooled to -25 °C. DBU (299 μL, 2.00 mmol) was added dropwise and the reaction was stirred at -25 °C for 4 h. The reaction was worked up according to the general protocol and purified by flash silica gel chromatography (99:05 → 90:10 hexanes : ethyl acetate) to afford α-trifluoromethylnitroalkane **6** (214 mg, 78%) as a clear oil **6**: <sup>1</sup>H NMR (600 MHz, CDCl<sub>3</sub>) δ 8.01 (d, *J* = 8.5 Hz, 2H), 7.43 (d, *J* = 8.3 Hz, 2H), 2.69 (hept, *J* = 7.8 Hz, 2H), 2.63 (s, 3H), 1.12 (t, *J* = 7.2 Hz, 3H); <sup>13</sup>C NMR (151 MHz, CDCl<sub>3</sub>) δ 197.0, 138.3, 136.3, 128.8, 127.5, 122.7 (q, *J* = 285 Hz), 96.8 (q, *J* = 27.2 Hz), 28.2, 26.8, 8.7; <sup>19</sup>F NMR (565 MHz, CDCl<sub>3</sub>) δ -68.7; FTIR (cm<sup>-1</sup>): 2955, 1692, 1565, 1411, 1269, 1169, 824. HRMS (CI) *m/z* calculated for [C<sub>12</sub>H<sub>13</sub>NO<sub>3</sub>F<sub>3</sub>]<sup>+</sup>: 276.0848; found: 276.0823.

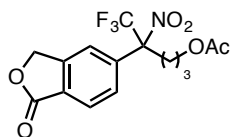

**(7)** According to general protocol A: **S2** (248 mg, 850 μmol), Umemoto's reagent **2** (532 mg, 1.30 mmol), and anhydrous dichloromethane (10 mL) were combined under N<sub>2</sub> and cooled to -25 °C. DBU (299 μL, 2.00 mmol) was added dropwise and the reaction was stirred at -25 °C for 4 h. The reaction was worked up according to the general protocol and purified by flash silica gel chromatography (65:35 hexanes : ethyl acetate) to afford α-trifluoromethylnitroalkane **7** (246 mg, 80%) as a white solid: <sup>1</sup>H NMR (600 MHz, CDCl<sub>3</sub>) δ 8.03 (d, *J* = 8.2 Hz, 1H), 7.52 (d, *J* = 8.2 Hz, 1H), 7.45 (s, 1H), 5.38 (s, 2H), 4.13 (t, *J* = 6.1 Hz, 2H), 2.72 (dt, *J* = 10.6, 4.9 Hz, 2H), 2.08 (s, 3H), 1.96 - 1.86 (m, 1H), 1.77 - 1.67 (m, 1H); <sup>13</sup>C NMR (101 MHz, CDCl<sub>3</sub>) δ 171.0, 169.6, 147.3, 137.5, 127.9, 127.9, 126.7, 122.4 (q, *J* = 286 Hz), 121.2, 96.2 (q, *J* = 28.1 Hz), 69.6, 63.2, 31.9, 23.6, 21.0; <sup>19</sup>F NMR (565 MHz, CDCl<sub>3</sub>) δ -68.5; FTIR (cm<sup>-1</sup>): 2960, 1773, 1739, 1567, 1240; mp = 109-110 °C; HRMS (LIFDI) *m/z* calculated for [C<sub>15</sub>H<sub>14</sub>NO<sub>6</sub>F<sub>3</sub>]<sup>+</sup>: 361.0773; found: 361.0766.

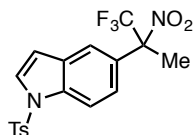

**(8)** According to general protocol A: **S10** (344 mg, 1.00 mmol), Umemoto's reagent **2** (523 mg, 1.30 mmol) and anhydrous dichloromethane (10 mL) were combined under N<sub>2</sub> and cooled to -25 °C. DBU (299 μL, 2.00 mmol) was added dropwise and the reaction was stirred at -25 °C for 4 h. The reaction was worked up according to the



general protocol and purified by flash silica gel chromatography (80:20 hexanes : ethyl acetate) to afford **8** (309 mg, 75%) as a light yellow solid:  $^1\text{H}$  NMR (400 MHz,  $\text{CDCl}_3$ )  $\delta$  8.02 (d,  $J$  = 8.9 Hz, 1H), 7.78 (d,  $J$  = 8.4 Hz, 2H), 7.64 (dd,  $J$  = 4.8, 2.9 Hz, 2H), 7.39 - 7.31 (m, 1H), 7.29 - 7.24 (m, 2H), 6.69 (d,  $J$  = 3.7 Hz, 1H), 2.37 (s, 3H), 2.26 (s, 3H);  $^{13}\text{C}$  NMR (101 MHz,  $\text{CDCl}_3$ )  $\delta$  145.6, 135.4, 135.0, 130.9, 130.24, 127.9, 127.0, 126.6, 122.8 (q,  $J$  = 283 Hz), 122.7, 120.3, 114.0, 108.9, 92.6 (q,  $J$  = 28.7 Hz), 21.8, 20.9;  $^{19}\text{F}$  NMR (376 MHz,  $\text{CDCl}_3$ )  $\delta$  -72.3; FTIR ( $\text{cm}^{-1}$ ): 3146, 2925, 1564, 1376, 1173, 1135; mp: 104-105 °C; HRMS (LIFDI)  $m/z$  calculated for  $[\text{C}_{18}\text{H}_{15}\text{N}_2\text{O}_4\text{SF}_3]^+$ : 412.0705; found: 412.0703.

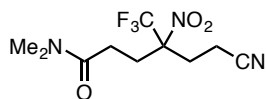

**(9)** According to general protocol A: **S5** (213 mg, 1.00 mmol), Umemoto's reagent **2** (523 mg, 1.30 mmol), and anhydrous dichloromethane (10 mL) were combined under  $\text{N}_2$  and cooled to  $-25$  °C. DBU (299  $\mu\text{L}$ , 2.00 mmol) was added dropwise and the reaction was stirred at  $-25$  °C for 4 h. The reaction was worked up according to the general protocol and purified by flash silica gel chromatography (60:40 benzene : ethyl acetate) to afford  $\alpha$ -trifluoromethylnitroalkane **9** (198 mg, 70%) as a white solid:  $^1\text{H}$  NMR (400 MHz,  $\text{CDCl}_3$ )  $\delta$  2.98 (d,  $J$  = 10.7 Hz, 6H), 2.75 - 2.48 (m, 6H), 2.46 - 2.35 (m, 2H);  $^{13}\text{C}$  NMR (101 MHz,  $\text{CDCl}_3$ )  $\delta$  169.3, 122.7 (q,  $J$  = 286 Hz), 117.4, 91.7 (q,  $J$  = 27.4 Hz), 37.1, 35.9, 28.8, 28.4, 27.0, 12.8 (q,  $J$  = 2.1 Hz);  $^{19}\text{F}$  NMR (565 MHz,  $\text{CDCl}_3$ )  $\delta$  -70.57; FTIR ( $\text{cm}^{-1}$ ): 2940, 2254, 1644, 1558, 1189; mp = 52-54 °C; GC/MS (EI) 235.1 (M- $\text{NO}_2$ ) $^+$ ; HRMS (ESI)  $m/z$  calculated for  $[\text{C}_{10}\text{H}_{15}\text{N}_3\text{O}_3\text{F}_3]^+$ : 282.10600; found: 282.10552.

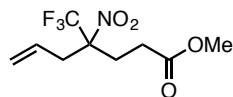

**(10)** According to general protocol A: methyl 4-nitrohept-6-enoate **S3** (187 mg, 1.00 mmol), Umemoto's reagent **2** (523 mg, 1.30 mmol) and anhydrous dichloromethane (10 mL) were combined under  $\text{N}_2$  and cooled to  $-25$  °C. DBU (299  $\mu\text{L}$ , 2.00 mmol) was added dropwise and the reaction was stirred at  $-25$  °C for 18 h. The reaction was worked up according to the general protocol and purified by flash silica gel chromatography (100:0  $\rightarrow$  95:5 hexanes : ethyl acetate) to afford **10** (119 mg, 47%) as a clear oil:  $^1\text{H}$  NMR (600 MHz,  $\text{CDCl}_3$ )  $\delta$  5.69 (dd,  $J$  = 17.2, 7.5 Hz, 1H), 5.33 - 5.25 (m, 2H), 3.71 (s, 3H), 2.98 (dd,  $J$  = 14.9, 7.3 Hz, 1H), 2.90 (dd,  $J$  = 14.9, 7.3 Hz, 1H), 2.65 - 2.57 (m, 1H), 2.56 - 2.42 (m, 3H);  $^{13}\text{C}$  NMR (151 MHz,  $\text{CDCl}_3$ )  $\delta$  171.8, 128.1, 122.7, 122.9 (q,  $J$  = 286 Hz), 92.5 (q,  $J$  = 26.8 Hz), 52.2, 37.6, 28.2, 27.3;  $^{19}\text{F}$  NMR (565 MHz,  $\text{CDCl}_3$ )  $\delta$  -71.1; FTIR ( $\text{cm}^{-1}$ ): 3089, 2957, 1742, 1652, 1563, 1439, 1201, 936; GC/MS (EI) 224.0 (M- $\text{OCH}_3$ ) $^+$ ; HRMS (CI)  $m/z$  calculated for  $[\text{C}_9\text{H}_{13}\text{NO}_4\text{F}_3]^+$ : 256.0797; found: 256.0810.

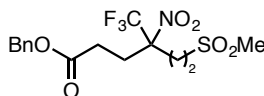

**(11)** According to general protocol A: benzyl 6-(methylsulfonyl)-4-nitrohexanoate **S4** (315 mg, 960  $\mu\text{mol}$ ), Umemoto's reagent **2** (500 mg, 1.24 mmol) and anhydrous dichloromethane (10 mL) were combined under  $\text{N}_2$  and cooled to  $-25$  °C. DBU (299  $\mu\text{L}$ , 2.00 mmol) was added dropwise and the reaction was stirred at  $-25$  °C for 4 h. The reaction was worked up according to the general protocol and purified by flash silica gel chromatography (95:5  $\rightarrow$  80:20 hexanes : ethyl acetate) to afford  $\alpha$ -trifluoromethylnitroalkane **11** (250 mg, 66%) as a clear oil:  $^1\text{H}$  NMR (600 MHz,  $\text{CDCl}_3$ )  $\delta$  7.41 - 7.32 (m, 5H), 5.15 (s, 2H), 3.19 (dt,  $J$  = 12.9, 4.2 Hz, 1H), 3.12 (dt,  $J$  = 12.7, 4.3 Hz, 1H), 2.98 (s, 3H), 2.81 - 2.72 (m, 1H), 2.69 - 2.45 (m, 5H);  $^{13}\text{C}$  NMR (151 MHz,  $\text{CDCl}_3$ )  $\delta$  170.7, 135.3, 128.8, 128.7, 128.5, 122.6 (q,  $J$  = 286 Hz), 91.5 (q,  $J$  = 27.4 Hz), 67.3, 49.0, 41.0, 28.2, 28.1, 25.0;  $^{19}\text{F}$  NMR (565 MHz,  $\text{CDCl}_3$ )  $\delta$  -70.8; FTIR ( $\text{cm}^{-1}$ ): 3011, 1731, 1565, 1451, 1308, 1176, 755 ; ESI-MS 420.3 (M+Na) $^+$ . HRMS (ESI)  $m/z$  calculated for  $[\text{C}_{15}\text{H}_{19}\text{NO}_6\text{F}_3\text{S}]^+$ : 398.0880; found: 398.0869.

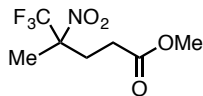

**(12)** According to general protocol A: Methyl 4-nitropentanoate (484 mg, 3.00 mmol), Umemoto's reagent **2** (1.57 g, 3.90 mmol) and anhydrous dichloromethane (30 mL) were combined under  $\text{N}_2$  and cooled to  $-25$  °C. DBU (897  $\mu\text{L}$ , 6.00 mmol) was added dropwise and the reaction was stirred at  $-25$  °C for 4 h. The reaction was worked up according to the general protocol and purified via silica gel flash chromatography (95:5  $\rightarrow$  80:20 hexanes : ethyl acetate) to afford  $\alpha$ -trifluoromethylnitroalkane **12** (624 mg, 91%) as a yellow oil:  $^1\text{H}$  NMR (600 MHz,  $\text{CDCl}_3$ )  $\delta$  3.68 (s, 3H), 2.77 - 2.63 (m, 1H), 2.48 - 2.27 (m, 3H), 1.76 (s, 3H);  $^{13}\text{C}$  NMR (101 MHz,  $\text{CDCl}_3$ )  $\delta$  171.6, 123.0 (q,  $J$  = 287 Hz), 90.0 (q,  $J$  = 29.1 Hz), 52.3, 28.7, 28.05, 17.6;  $^{19}\text{F}$  NMR (565

MHz, CDCl<sub>3</sub>) δ -75.7; FTIR (cm<sup>-1</sup>): 2361, 1652, 1559, 1540, 1175; GC/MS (EI) 198.1 (M-OCH<sub>3</sub>)<sup>+</sup>. HRMS (CI) m/z calculated for [C<sub>7</sub>H<sub>11</sub>NO<sub>4</sub>F<sub>3</sub>]<sup>+</sup>: 230.0640; found: 230.0626.

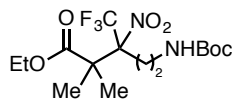

**(14)** According to general protocol A: Ethyl 5-(*tert*-butoxycarbonylamino)-2,2-dimethyl-3-nitropentanoate (318 mg, 1.00 mmol), Umemoto's reagent **2** (532 mg, 1.30 mmol), and anhydrous dichloromethane (10 mL) were combined under N<sub>2</sub> and cooled to -25 °C. DBU (299 μL, 2.00 mmol) was added dropwise and the reaction

was stirred at -25 °C for 48 h. The reaction was worked up according to the general protocol and purified by flash silica gel chromatography (89:11 hexanes : ethyl acetate) to afford **14** (141 mg, 36%) as a pale yellow solid: <sup>1</sup>H NMR (400 MHz, CDCl<sub>3</sub>) δ 4.76 (s, 1H), 4.13 (q, *J* = 7.1 Hz, 2H), 3.47 - 3.32 (m, 1H), 2.96 (ddt, *J* = 14.3, 10.3, 5.0 Hz, 1H), 2.65 - 2.40 (m, 2H), 1.49 - 1.34 (m, 15H), 1.23 (t, *J* = 7.1 Hz, 3H); <sup>13</sup>C NMR (101 MHz, CDCl<sub>3</sub>) δ 171.6, 155.7, 123.1 (q, *J* = 287 Hz), 96.1 (q, *J* = 26.3 Hz), 79.9, 62.4, 49.2, 36.2, 32.0, 28.5, 23.3, 23.1, 13.8; <sup>19</sup>F NMR (565 MHz, CDCl<sub>3</sub>) δ -62.6; FTIR (cm<sup>-1</sup>): 3350, 2981, 1720, 1568, 1174; mp: 58-60 °C; ESI-MS: 409.1 (M+Na)<sup>+</sup>. HRMS (ESI) m/z calculated for [C<sub>15</sub>H<sub>25</sub>N<sub>2</sub>O<sub>6</sub>F<sub>3</sub>Na]<sup>+</sup>: 409.15569; found: 409.15437.

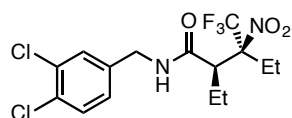

**(15)** According to general protocol A: *N*-(3,4-dichlorobenzyl)-2-ethyl-3-nitropentanamide (332 mg, 1.00 mmol), Umemoto's reagent **2** (532 mg, 1.30 mmol), and anhydrous dichloromethane (10 mL) were combined under N<sub>2</sub> and cooled to -25 °C. DBU (299 μL, 2.00 mmol) was added dropwise and the reaction

was stirred at -25 °C for 24 h. The reaction was worked up according to the general protocol and purified by flash silica gel chromatography (75:25 hexanes : ethyl acetate). A second column (50:50 hexanes : ethyl acetate) to remove trace dibenzothiophene afforded α-trifluoromethylnitroalkane **15** (291 mg, 73%) as a light yellow solid: <sup>1</sup>H NMR (600 MHz, CDCl<sub>3</sub>) δ 7.41 (d, *J* = 8.2 Hz, 1H), 7.32 (d, *J* = 1.7 Hz, 1H), 7.06 (dd, *J* = 8.2, 1.9 Hz, 1H), 5.84 (s, 1H), 4.32 (qd, *J* = 15.1, 5.8 Hz, 2H), 3.07 - 2.98 (m, 1H), 2.74 - 2.64 (m, 1H), 2.06 (dq, *J* = 14.7, 7.2 Hz, 1H), 1.93 (tq, *J* = 14.2, 7.2 Hz, 1H), 1.65 (dd, *J* = 12.8, 6.8 Hz, 1H), 1.09 (t, *J* = 7.2 Hz, 3H), 0.94 (t, *J* = 7.3 Hz, 3H); <sup>13</sup>C NMR (101 MHz, CDCl<sub>3</sub>) δ 168.1, 137.6, 132.9, 131.9, 130.8, 129.8, 127.1, 122.7 (q, *J* = 287 Hz), 96.8 (q, *J* = 25.8), 54.0, 43.0, 21.9, 21.0, 12.6, 8.3; <sup>19</sup>F NMR (565 MHz, CDCl<sub>3</sub>) δ -65.5; FTIR (cm<sup>-1</sup>): 3297, 3088, 1658, 1563, 1201, 1088, 1032; 116-118 °C; ESI-MS: 401.2 (M+H)<sup>+</sup>. HRMS (ESI) m/z calculated for [C<sub>15</sub>H<sub>18</sub>N<sub>2</sub>O<sub>3</sub>Cl<sub>2</sub>F<sub>3</sub>]<sup>+</sup>: 401.06411; found: 401.06349; X-ray crystals were obtained by vapor diffusion (dichloromethane/ hexanes).

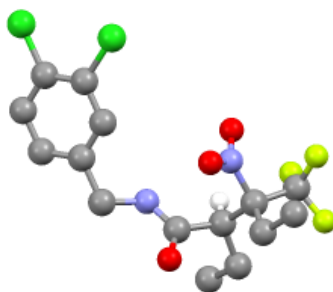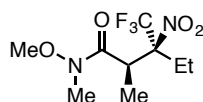

**(16)** According to general protocol A: *N*-methoxy-*N*,2-dimethyl-3-nitropentanamide (204 mg, 1.0 mmol), Umemoto's reagent **2** (532 mg, 1.30 mmol), and anhydrous dichloromethane (10 mL) were combined under N<sub>2</sub> and cooled to -25 °C. DBU (299 μL, 2.00 mmol) was added dropwise and the reaction was stirred at -25 °C for 4 h.

The reaction was worked up according to the general protocol and purified by flash silica gel chromatography (95:5 → 90:10 hexanes : ethyl acetate) to afford α-trifluoromethylnitroalkane **16** (172 mg, 63%) as a clear oil: <sup>1</sup>H NMR (400 MHz, CDCl<sub>3</sub>) δ 4.05 (q, *J* = 7.1 Hz, 1H), 3.71 (s, 3H), 3.15 (s, 3H), 2.90 (ddd, *J* = 15.9, 7.5, 2.5 Hz, 1H), 2.16 (dd, *J* = 15.7, 7.6 Hz, 1H), 1.36 (d, *J* = 7.2 Hz, 3H), 1.11 (td, *J* = 7.4, 1.8 Hz, 3H); <sup>13</sup>C NMR (151 MHz, CDCl<sub>3</sub>) δ 171.1, 123.1 (q, *J* = 287 Hz), 95.3 (q, *J* = 25.6 Hz), 61.6, 39.2, 32.4, 22.7, 13.8, 8.5; <sup>19</sup>F NMR (565 MHz, CDCl<sub>3</sub>) δ -66.9; FTIR (cm<sup>-1</sup>): 2985, 2951, 1670, 1565, 1203,

1179 ; GC/MS (EI) 226.1 (M-NO<sub>2</sub>)<sup>+</sup>. HRMS (CI) m/z calculated for [C<sub>9</sub>H<sub>16</sub>N<sub>2</sub>O<sub>4</sub>F<sub>3</sub>]<sup>+</sup>: 273.1062; found: 273.1064.

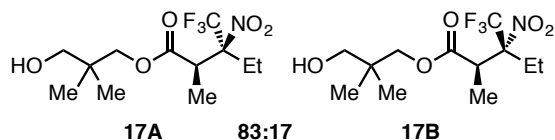

**(17)** According to general protocol A: 3-Hydroxy-2,2-dimethylpropyl 2-methyl-3-nitropentanoate **S7** (315 mg, 1.00 mmol), Umemoto's reagent **2** (523 mg, 1.30 mmol) and anhydrous dichloromethane (10 mL) were combined under N<sub>2</sub> and cooled to -25 °C. DBU (299 μL, 2.00

mmol) was added dropwise and the reaction was stirred at -25 °C for 4 h. The reaction was worked up according to the general protocol and concentrated *in vacuo*. NMR analysis of the crude reaction mixture revealed an 83:17 mixture of syn and anti isomers. The crude reaction was purified by flash silica gel chromatography (95:5 → 80:20 hexanes : ethyl acetate) to afford α-trifluoromethylnitroalkane **17** (157 mg, 50%) as a clear oil: The product was isolated as a mixture of diastereomers (dr: 88:12): <sup>1</sup>H NMR (600 MHz, CDCl<sub>3</sub>: mixture of diastereomers; useful diagnostic peaks for each compound are listed) δ **17A**: 3.87 (d, *J* = 10.9 Hz, 1H), 3.72 (q, *J* = 7.2 Hz, 1H), 1.39 (d, *J* = 7.2 Hz, 3H); **17B**: 3.60 (q, *J* = 7.1 Hz, 1H), 2.00 (d, *J* = 2.0 Hz, 1H), 1.31 (d, *J* = 7.2 Hz, 3H); <sup>13</sup>C NMR (151 MHz, CDCl<sub>3</sub>) δ **17A**: 170.5, 122.8 (q, *J* = 287 Hz), 95.0 (q, *J* = 26 Hz), 68.1, 44.5, 36.2, 22.7, 21.5, 12.8, 8.5; **17B**: 170.3, 123.0 (q, *J* = 287 Hz), 95.2 (q, *J* = 26 Hz), 68.3, 43.9, 23.8, 13.0; <sup>19</sup>F NMR (565 MHz, CDCl<sub>3</sub>) δ **17A**: -66.8, **17B**: -67.1; FTIR (cm<sup>-1</sup>): 3435, 2962, 1742, 1569, 1470, 1245, 1203, 824; GC/MS (EI) 212.0 (M-C<sub>5</sub>H<sub>11</sub>O<sub>2</sub>)<sup>+</sup>; 212.1 (M-C<sub>5</sub>H<sub>11</sub>O<sub>2</sub>)<sup>+</sup>. HRMS (CI) m/z calculated for [C<sub>12</sub>H<sub>21</sub>NO<sub>5</sub>F<sub>3</sub>]<sup>+</sup>: 316.1372; found: 316.1364.

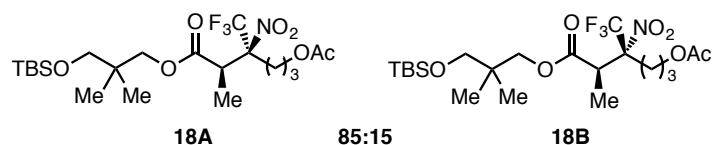

**(18)** According to general protocol A: **S6** (433 mg, 1.00 mmol), Umemoto's reagent **2** (523 mg, 1.30 mmol) and anhydrous dichloromethane (10 mL) were combined

under N<sub>2</sub> and cooled to -25 °C. DBU (299 μL, 2.00 mmol) was added dropwise and the reaction was stirred at -25 °C for 4 h. The reaction was worked up according to the general protocol and concentrated *in vacuo*. NMR analysis of the crude reaction mixture revealed an 85:15 mixture of syn and anti isomers. The crude reaction was purified flash silica gel chromatography (100:0 → 95:5 hexanes : ethyl acetate) to afford α-trifluoromethylnitroalkane **18** (292 mg, 58%) as a clear oil. The product was isolated as a mixture of diastereomers (dr: 92:08): <sup>1</sup>H NMR (600 MHz, CDCl<sub>3</sub>: mixture of diastereomers; useful diagnostic peaks for each compound are listed) δ **18A**: 3.81 (d, *J* = 10.6 Hz, 1H), 3.76 (q, *J* = 7.2 Hz, 1H), 1.40 (d, *J* = 7.2 Hz, 3H), 0.88 (s, 9H), 0.86 (d, *J* = 2.4 Hz, 6H), 0.03 (d, *J* = 5.2 Hz, 6H); **18B**: 3.88 (d, *J* = 10.6 Hz, 1H), 3.61 (q, *J* = 7.2 Hz, 1H); <sup>13</sup>C NMR (151 MHz, CDCl<sub>3</sub>) δ **18A**: 170.9, 169.8, 122.8, (q, *J* = 288 Hz), 94.2, (q, *J* = 26 Hz), 71.5, 63.8, 44.4, 43.9, 36.2, 26.1, 25.9, 23.2, 21.5, 21.4, 20.9, 18.3, 12.9, -5.5, -5.6; **18B**: 71.4, 63.7, 43.9, 13.2; <sup>19</sup>F NMR (565 MHz, CDCl<sub>3</sub>) δ **18A**: -67.2, **18B**: -67.5; FTIR (cm<sup>-1</sup>): 2957, 2897, 1745, 1572, 1473, 1365, 1236, 838, 776; GC/MS (ESI) 524.3 (M+Na)<sup>+</sup>. HRMS (ESI) m/z calculated for [C<sub>21</sub>H<sub>39</sub>NO<sub>7</sub>F<sub>3</sub>Si]<sup>+</sup>: 502.2442; found: 502.24267.

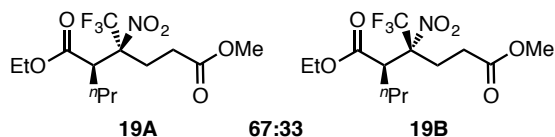

**(19)** According to the general protocol: 1-Ethyl 6-methyl 3-nitro-2-propylhexanedioate (275 mg, 1.00 mmol), Umemoto's reagent **2** (523 mg, 1.30 mmol), and anhydrous dichloromethane (10 mL) were combined under N<sub>2</sub> and cooled to -25 °C. DBU (299 μL, 2.00

mmol) was added dropwise and the reaction was stirred at -25 °C for 4 h. The reaction was worked up according to the general protocol and concentrated *in vacuo*. NMR analysis of the crude reaction mixture revealed a 67:33 mixture of syn and anti isomers. The reaction was purified by silica gel flash chromatography (100:0 → 95:5 hexanes : ethyl acetate) to afford α-trifluoromethylnitroalkane **19** (254 mg, 74%) as a yellow oil. The product was isolated as a mixture of diastereomers (dr: 73: 27): <sup>1</sup>H NMR (600 MHz, CDCl<sub>3</sub>: mixture of diastereomers; useful diagnostic peaks for each compound are listed. See attached spectra for details): δ **19A**: 4.15 (q, *J* = 7.1 Hz, 2H), 3.71 (s, 3H), 3.44 (dd, *J* = 12.1, 2.4 Hz, 1H), 0.91 (t, 3H); **19B**: 4.25 - 4.19 (m, 2H), 3.73 (s, 3H), 3.50 (dd, *J* = 12.0, 2.6 Hz, 1H), 0.95 (t, 3H); <sup>13</sup>C NMR (151 MHz, CDCl<sub>3</sub>) δ **19A**: 172.0, 169.2, 122.7 (q, *J* = 286 Hz), 62.2, 50.3, 29.3, 28.5, 24.8, 21.3, 13.9, 13.7, 13.5; **19B**: 172.1, 169.5, 122.6 (q, *J* = 287 Hz), 62.1, 49.5, 29.9, 23.9, 28.6, 20.8, 14.0, 13.5; <sup>19</sup>F

NMR (565 MHz, CDCl<sub>3</sub>) δ **19A**: -66.2, **19B**: -68.1; FTIR (cm<sup>-1</sup>): 2965, 2878, 1743, 1570, 1190; GC/MS (EI) 297.1 (M-NO<sub>2</sub>)<sup>+</sup>; 297.1 (M-NO<sub>2</sub>)<sup>+</sup>. HRMS (CI) m/z calculated for [C<sub>13</sub>H<sub>21</sub>NO<sub>6</sub>F<sub>3</sub>]<sup>+</sup>: 344.1321; found: 344.1329.

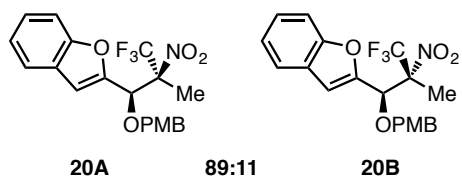

**(20)** According to general protocol A: **S9** (341 mg, 1.00 mmol), Umemoto's reagent **2** (523 mg, 1.30 mmol) and anhydrous dichloromethane (10 mL) were combined under N<sub>2</sub> and cooled to -25 °C. DBU (299 μL, 2.00 mmol) was added dropwise and the reaction was stirred at -25 °C for 4 h. The reaction was worked up according to the general protocol and concentrated *in vacuo*. NMR analysis of the crude reaction mixture revealed an 89:11 mixture of syn and anti isomers. The crude reaction was purified by flash silica gel chromatography (100:0 → 95:05 hexanes : ethyl acetate) to afford α-trifluoromethylnitroalkane **20** (236 mg, 58%) as a clear oil: <sup>1</sup>H NMR (600 MHz, CDCl<sub>3</sub>: mixture of diastereomers; useful diagnostic peaks for each compound are listed) δ **20A**: 7.57 (d, *J* = 7.7 Hz, 1H), 7.50 (d, *J* = 8.3 Hz, 1H), 7.36 - 7.32 (m, 1H), 7.21 (d, *J* = 8.5 Hz, 2H), 7.15 (s, 1H), 6.88 (d, *J* = 8.6 Hz, 2H), 6.78 (s, 1H), 5.53 (s, 1H), 4.62 (d, *J* = 11.1 Hz, 1H), 4.42 (d, *J* = 11.1 Hz, 1H), 1.89 (s, 3H); **20B**: 7.54 (d, *J* = 8.4 Hz, 1H), 7.09 (d, *J* = 8.4 Hz, 2H), 6.85 (d, *J* = 8.6 Hz, 2H), 5.57 (s, 1H), 4.50 (d, *J* = 11.0 Hz, 1H), 4.27 (d, *J* = 11.2 Hz, 1H), 2.03 (s, 3H); <sup>13</sup>C NMR (151 MHz, CDCl<sub>3</sub>) δ **20A**: 159.9, 155.6, 149.5, 130.1, 128.1, 125.5, 123.5, 122.7 (q, *J* = 287 Hz), 119.9, 111.8, 109.7, 109.3, 93.16, (q, *J* = 26.5 Hz), 74.5, 72.3, 55.4, 13.5; **20B**: 159.8, 155.7, 149.3, 129.9, 128.0, 125.6, 109.7, 73.9, 71.6, 12.9; <sup>19</sup>F NMR (565 MHz, CDCl<sub>3</sub>) δ **20A**: -72.0, **20B**: -73.2; FTIR (cm<sup>-1</sup>): 2936, 2838, 1613, 1566, 1453, 1254, 751; GC/MS (EI) 409.0 (M)<sup>+</sup>. HRMS (CI) m/z calculated for [C<sub>20</sub>H<sub>18</sub>NO<sub>5</sub>F<sub>3</sub>]<sup>+</sup>: 409.1137; found: 409.1135.

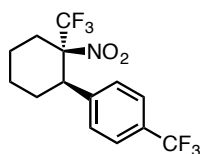

**(21)** According to general protocol A: *rac*-2-(4-Trifluoromethylphenyl)-1-nitrocyclohexane (410 mg, 1.50 mmol), Umemoto's reagent **2** (785 mg, 1.95 mmol), and anhydrous dichloromethane (15 mL) were combined under N<sub>2</sub> and cooled to -25 °C. DBU (448 μL, 3.00 mmol) was added dropwise and the reaction was stirred at -25 °C for 4 h. The reaction was worked up according to the general protocol and purified by flash silica gel chromatography (77:20:3 hexanes : benzene : ethyl acetate) to afford α-trifluoromethylnitroalkane **21** (333 mg, 65%) as a light yellow solid: <sup>1</sup>H NMR (400 MHz, CDCl<sub>3</sub>) δ 7.55 (d, *J* = 8.2 Hz, 2H), 7.40 (d, *J* = 8.2 Hz, 2H), 3.33 (dd, *J* = 12.6, 3.8 Hz, 1H), 2.66 (d, *J* = 14.7 Hz, 1H), 2.38 (qd, *J* = 13.0, 3.7 Hz, 1H), 2.11 - 1.96 (m, 2H), 1.96 - 1.71 (m, 3H), 1.52 (ddp, *J* = 17.0, 8.7, 4.1 Hz, 1H); <sup>13</sup>C NMR (101 MHz, CDCl<sub>3</sub>) δ 142.9, 130.2 (q, *J* = 35.5 Hz), 129.9, 125.3 (q, *J* = 3.64 Hz), 124.1 (q, *J* = 27.2 Hz), 122.9 (q, *J* = 28.4 Hz), 92.9 (q, *J* = 25.4 Hz), 46.4, 31.5, 29.1, 24.8, 20.6; <sup>19</sup>F NMR (376 MHz, CDCl<sub>3</sub>) δ -62.7, -70.9; FTIR (cm<sup>-1</sup>): 2947, 1561, 1328, 1161, 1123; mp = 43-45 °C; GC/MS (EI) 341.1 (M)<sup>+</sup>. HRMS (CI) m/z calculated for [C<sub>14</sub>H<sub>13</sub>NO<sub>2</sub>F<sub>6</sub>]<sup>+</sup>: 341.0871; found: 341.0850; crystals for X-ray analysis were obtained by slow evaporation of hexanes.

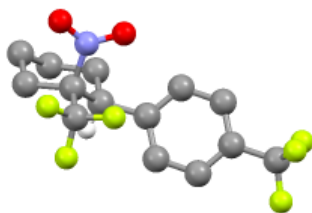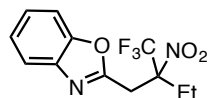

**(23)** A hot 25 mL round bottom flask equipped with a magnetic stir bar and a rubber septum was attached to a double manifold and cooled under vacuum. Once cooled, the flask was backfilled with N<sub>2</sub>, the septum was removed, and 2-(2-nitrobutyl)benzo[d]oxazole (220 mg, 1.00 mmol) and Umemoto's reagent **2** (523 mg, 1.30 mmol) were added. The septum was replaced, the flask was reattached to a double manifold and evacuated and backfilled with N<sub>2</sub> three times. Anhydrous dichloromethane (10 mL) was added via syringe and the flask was lowered into a pre-cooled -25 °C cooling bath and stirred. 1,1,3,3-Tetramethylguanidine (121 μL, 1.00 mmol) was then added dropwise via syringe. The resulting homogenous solution was stirred at -25 °C for 4 h, after which the flask was removed from the cooling unit and warmed to rt. The

reaction mixture was washed with brine (1x), dried over magnesium sulfate, and concentrated *in vacuo* onto Celite. The product was purified by silica gel flash chromatography (100:0 → 95:5 hexanes : ethyl acetate) to afford  $\alpha$ -trifluoromethylnitroalkene **23** (128 mg, 44%) as a pale yellow oil:  $^1\text{H}$  NMR (400 MHz,  $\text{CDCl}_3$ )  $\delta$  7.74 - 7.68 (m, 1H), 7.56 - 7.50 (m, 1H), 7.41 - 7.32 (m, 2H), 3.99 (d,  $J$  = 16.0 Hz, 1H), 3.81 (d,  $J$  = 16.0 Hz, 1H), 2.54 (q,  $J$  = 7.5 Hz, 2H), 1.15 (dd,  $J$  = 7.4, 1.0 Hz, 3H);  $^{13}\text{C}$  NMR (101 MHz,  $\text{CDCl}_3$ )  $\delta$  158.7, 150.8, 140.9, 125.7, 124.9, 122.8 (q,  $J$  = 291 Hz), 120.4, 110.9, 92.4 (q,  $J$  = 26.9 Hz), 30.39 (q,  $J$  = 1.41 Hz), 25.2, 8.45 (d,  $J$  = 1.66 Hz);  $^{19}\text{F}$  NMR (376 MHz,  $\text{CDCl}_3$ )  $\delta$  -72.9; FTIR ( $\text{cm}^{-1}$ ): 2985, 1567, 1455, 1180, 1169; GC/MS (EI) 288.1 (M) $^+$ . HRMS (CI)  $m/z$  calculated for  $[\text{C}_{12}\text{H}_{12}\text{N}_2\text{O}_3\text{F}_3]^+$ : 289.0800; found: 289.0794.

## 7. Synthesis of Trifluoromethylalkenes:

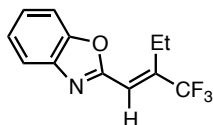

**(24)** According to general protocol A: 2-(2-Nitrobutyl)benzo[*d*]oxazole (220 mg, 1.00 mmol), Umemoto's reagent **2** (523 mg, 1.30 mmol), and anhydrous dichloromethane (10 mL) were combined under  $\text{N}_2$  and cooled to  $-25\text{ }^\circ\text{C}$ . DBU (299  $\mu\text{L}$ , 2.00 mmol) was added dropwise and the reaction was stirred at  $-25\text{ }^\circ\text{C}$  for 4 h. The reaction was worked up according to the general protocol and concentrated *in vacuo*. NMR

analysis revealed a >95:5 mixture of E and Z isomers. The crude reaction was purified flash silica gel chromatography (100:0 → 98:2 hexanes : ethyl acetate) to afford vinyltrifluoromethylalkene **24** (147 mg, 61%) as a yellow oil:  $^1\text{H}$  NMR (600 MHz,  $\text{CDCl}_3$ )  $\delta$  7.79 (d,  $J$  = 7.6 Hz, 1H), 7.57 (d,  $J$  = 7.7, 1H), 7.40 (pd,  $J$  = 7.2, 1.1 Hz, 2H), 6.96 (s, 1H), 2.97 (q,  $J$  = 7.5 Hz, 2H), 1.30 (t,  $J$  = 7.5 Hz, 3H);  $^{13}\text{C}$  NMR (151 MHz,  $\text{CDCl}_3$ )  $\delta$  159.6, 150.4, 142.6 (q,  $J$  = 28.9 Hz), 141.9, 126.3, 125.1, 123.2, 120.8, 117.3 (q,  $J$  = 6.9 Hz), 110.9, 21.0, 13.2;  $^{19}\text{F}$  NMR (565 MHz,  $\text{CDCl}_3$ )  $\delta$  -68.3; FTIR ( $\text{cm}^{-1}$ ): 2981, 2944, 2883, 1652, 1451, 1181, 745; GC/MS (EI) 241.1 (M) $^+$ . HRMS (CI)  $m/z$  calculated for  $[\text{C}_{12}\text{H}_{11}\text{NOF}_3]^+$ : 242.0793; found: 242.0780. The relative stereochemistry of compound **24** was determined using a combination of 1D nOe and  $^{19}\text{F}$ : $^1\text{H}$  HOSEY correlations.<sup>15</sup> The results from these experiments is summarized in the tables and figures below:

1D nOe Correlation For **24**

| Shift Irradiated (ppm) | 1 D nOe Correlation Seen (ppm) |
|------------------------|--------------------------------|
| 6.99                   | n/a                            |

2D HOSEY Correlation for **24**:  $^1\text{H}$  to  $^{19}\text{F}$

| $^{19}\text{F}$ Shift (ppm) | $^1\text{H}$ Correlations Seen (ppm) |
|-----------------------------|--------------------------------------|
| -68.3                       | 1.23                                 |
| -68.3                       | 2.90                                 |
| -68.3                       | 6.88                                 |

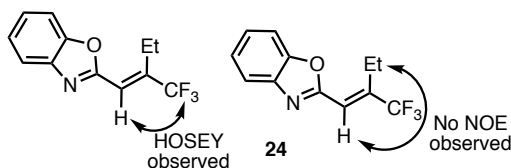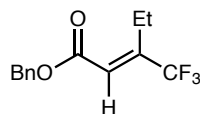

**27A**

**88:12**

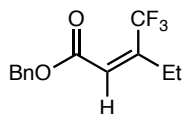

**27B**

**(27)** According to general protocol A: **25** (238 mg, 1.00 mmol), Umemoto's reagent **2** (523 mg, 1.30 mmol), and anhydrous dichloromethane (10 mL) were combined under  $\text{N}_2$  and cooled to  $-25\text{ }^\circ\text{C}$ . DBU (299  $\mu\text{L}$ , 2.00 mmol) was added dropwise and the reaction was stirred at  $-25\text{ }^\circ\text{C}$  for 4 h. The reaction was worked up according to the general protocol and concentrated *in vacuo*.

NMR analysis of the crude reaction mixture revealed an 88:12 mixture of E and Z isomers. The crude reaction was purified flash silica gel chromatography (100:0 → 98:2 hexanes : ethyl acetate) to afford mixture of vinyltrifluoromethylalkene **27A** and **27B** (154 mg, 60%) as a clear oil. An analytically pure sample of product **27A** was obtained by column chromatography. Alkene **27B** was isolated contaminated

with alkene **27A**. Diagnostic peaks for alkene **27A** are listed below:  $^1\text{H}$  NMR (600 MHz,  $\text{CDCl}_3$ )  $\delta$  7.41 - 7.32 (m, 5H), 6.35 (s, 1H), 5.21 (s, 2H), 2.70 (q,  $J = 7.5$  Hz, 2H), 1.17 (t,  $J = 7.5$  Hz, 3H);  $^{13}\text{C}$  NMR (151 MHz,  $\text{CDCl}_3$ )  $\delta$  164.5, 148.4 (q,  $J = 28.9$  Hz), 135.5, 128.8, 128.7, 123.6 (q,  $J = 276$  Hz) 121.5, (q,  $J = 6.20$  Hz), 120.9, 66.9, 20.4, 13.4;  $^{19}\text{F}$  NMR (565 MHz,  $\text{CDCl}_3$ )  $\delta$  -69.2; FTIR ( $\text{cm}^{-1}$ ): 3036, 2982, 1731, 1669, 1309, 1191, 696; GC/MS (EI) 258.1 (M) $^+$ . HRMS (CI)  $m/z$  calculated for  $[\text{C}_{13}\text{H}_{13}\text{O}_2\text{F}_3]^+$ : 258.0868; found: 258.0896.

Alkene **27B** was isolated contaminated with alkene **27A**. Diagnostic peaks for alkene **27B** are listed below:  $^1\text{H}$  NMR (400 MHz,  $\text{CDCl}_3$ )  $\delta$  6.06 (s, 1H), 5.20 (s, 2H), 2.33 (qd,  $J = 7.3, 1.6$  Hz, 2H), 1.13 (t,  $J = 7.3$  Hz, 3H);  $^{13}\text{C}$  NMR (151 MHz,  $\text{CDCl}_3$ )  $\delta$  164.8, 135.3, 128.8, 128.7, 128.6, 123.5, 67.4, 24.5, 11.8;  $^{19}\text{F}$  NMR (565 MHz,  $\text{CDCl}_3$ )  $\delta$  -63.5; GC/MS (EI) 258.1 (M) $^+$ . HRMS (CI)  $m/z$  calculated for  $[\text{C}_{13}\text{H}_{13}\text{O}_2\text{F}_3]^+$ : 258.0868; found: 258.0859.

The relative stereochemistry for alkenes **27A** and **27B** was determined using 1D nOe and  $^1\text{H}$ : $^{19}\text{F}$  HOSEY. The results from these experiments is summarized in the tables and figures below:

1D nOe Correlation For **27A**

| Shift Irradiated (ppm) | 1 D nOe Correlation Seen (ppm) |
|------------------------|--------------------------------|
| 6.38                   | n/a                            |

2D HOSEY Correlation For **27A**:  $^1\text{H}$  to  $^{19}\text{F}$

| $^{19}\text{F}$ Shift (ppm) | $^1\text{H}$ Correlations Seen (ppm) |
|-----------------------------|--------------------------------------|
| -69.2                       | 1.17                                 |
| -69.2                       | 2.69                                 |
| -69.2                       | 6.34                                 |

1D nOe Correlation For **27B**

| Shift Irradiated (ppm) | 1 D nOe Correlation Seen (ppm) |
|------------------------|--------------------------------|
| 6.10                   | 2.35, 1.16                     |
| 2.36                   | 6.10, 1.16                     |
| 1.16                   | 2.36, 1.16                     |

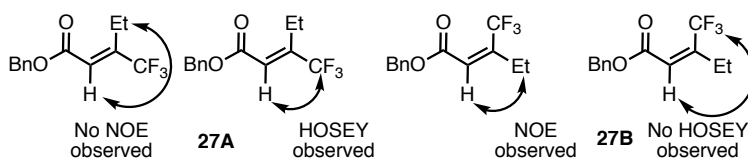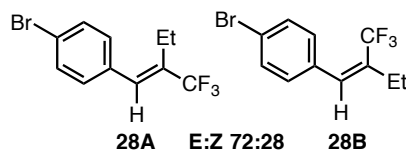

**(28)** A hot 25 mL round bottom flask equipped with a magnetic stir bar and a rubber septum was attached to a double manifold and cooled under vacuum. Once cooled, the flask was backfilled with  $\text{N}_2$ , the septum was removed, and 1-bromo-4-(2-nitro-2-(trifluoromethyl)butyl)benzene **3** (163 mg, 0.5 mmol), potassium *tert*-butoxide (84.0 mg, 0.75 mmol) and anhydrous dichloromethane (5 mL) were added and the reaction was stirred in an oil bath at 40  $^\circ\text{C}$  for 5 h. The reaction mixture was washed with  $\text{NH}_4\text{Cl}$  (1x15 mL), dried over magnesium sulfate, and concentrated *in vacuo*. NMR analysis of the crude reaction mixture revealed an 72:28 mixture of E and Z isomers. The product was purified by silica gel flash chromatography (100 % hexanes) to afford a mixture of vinyltrifluoromethylalkene **28A** and **28B** (130 mg, 93%) as a clear oil. The product was isolated as a mixture of E:Z (72:28) isomers.  $^1\text{H}$  NMR (600 MHz,  $\text{C}_6\text{D}_6$ : mixture of E and Z isomer; useful diagnostic peaks for each compound are listed; see attached spectra for details)  $\delta$  **28A**: 7.14 - 7.10 (m, 2H), 6.72 (s, 1H), 6.55 (d,  $J = 8.4$  Hz, 2H), 2.09 (q,  $J = 7.6$  Hz, 2H), 0.90 (t,  $J = 7.5$  Hz, 3H); **28B**: 6.78 (d,  $J = 8.3$  Hz, 2H), 6.12 (s, 1H), 1.99 (qd,  $J = 7.4, 1.4$  Hz, 2H), 0.86 (t,  $J = 7.4$  Hz, 3H);  $^{13}\text{C}$  NMR (151 MHz,  $\text{CDCl}_3$ )  $\delta$  **28A**: 133.6, 133.2, 131.9, 130.8 (q,  $J = 6.5$  Hz), 130.5, 124.9 (q,  $J = 274$  Hz), 122.6, 19.8, 13.4; **28B**: 134.4, 133.1, 132.7 (q,  $J = 3.9$  Hz), 131.3, 130.2 (q,  $J = 2.5$  Hz), 124.0 (q,  $J = 276$  Hz), 122.1, 25.9, 13.1;  $^{19}\text{F}$  NMR (565 MHz,  $\text{CDCl}_3$ )  $\delta$  -59.4, -66.7. FTIR ( $\text{cm}^{-1}$ ): 2975, 2942, 1653,

1489, 1251, 1161, 1115, 901; GC/MS (EI) 278.0 (M)<sup>+</sup>. HRMS (CI) m/z calculated for [C<sub>11</sub>H<sub>10</sub>F<sub>3</sub>Br]<sup>+</sup>: 277.9918; found: 277.9909.

1D nOe Correlation For **28A**

| Shift Irradiated (ppm) | 1 D nOe Correlation Seen (ppm) |
|------------------------|--------------------------------|
| 6.73                   | 6.55                           |

1D nOe Correlation For **28B**

| Shift Irradiated (ppm) | 1 D nOe Correlation Seen (ppm) |
|------------------------|--------------------------------|
| 6.12                   | 6.78, 1.99, 0.86               |

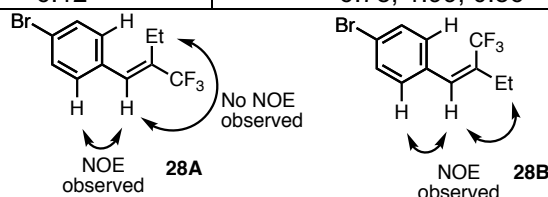

2D HOSEY Correlation For **28A**: <sup>1</sup>H to <sup>19</sup>F

| <sup>19</sup> F Shift (ppm) | <sup>1</sup> H Correlations Seen (ppm) |
|-----------------------------|----------------------------------------|
| -66.7                       | 0.90                                   |
| -66.7                       | 2.09                                   |
| -66.7                       | 6.72                                   |

2D HOSEY Correlation For **28B**: <sup>1</sup>H to <sup>19</sup>F

| <sup>19</sup> F Shift (ppm) | <sup>1</sup> H Correlations Seen (ppm) |
|-----------------------------|----------------------------------------|
| -59.4                       | 0.90                                   |
| -59.4                       | 1.99                                   |
| -59.4                       | 6.78                                   |

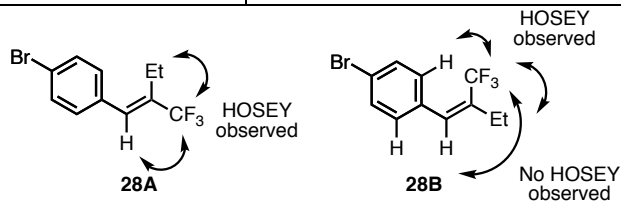

## 8. Reduction of Trifluoromethylnitroalkanes to Trifluoromethylamines

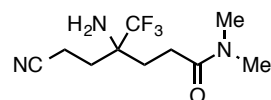

**(29)** To a 10 mL round bottom flask equipped with a magnetic stir bar was added  $\alpha$ -trifluoromethylnitroalkane **9** (100 mg, 356  $\mu$ mol) and acetic acid (1.19 mL). The flask was cooled to 0 °C in an ice bath and zinc dust (233 mg, 3.56 mmol) was added portionwise. Once addition of zinc was complete, the reaction was warmed to rt and stirred for 13 h. The crude reaction was filtered through Celite and diluted with ethyl acetate (10 mL). The reaction was washed with NaHCO<sub>3</sub> (3x, 10 mL). The aqueous layer was basified with 1 M NaOH. The water was removed *in vacuo* and the crude solid was washed with chloroform (25 mL). The mother liquor was concentrated *in vacuo* to afford  $\alpha$ -trifluoromethylamine **29** (70.1 mg, 78%) as a light pink solid: <sup>1</sup>H NMR (400 MHz, CDCl<sub>3</sub>)  $\delta$  3.02 (s, 3H), 2.93 (s, 3H), 2.82 - 2.70 (m, 1H), 2.70 - 2.57 (m, 1H), 2.58 - 2.45 (m, 2H), 2.36 - 2.05 (m, 4H); <sup>13</sup>C NMR (101 MHz, D<sub>2</sub>O)  $\delta$  173.7, 156.0, 125.4 (q, *J* = 286 Hz), 73.3 (q, *J* = 27.7 Hz), 37.2, 35.5, 25.9, 24.2, 24.0, 21.7; <sup>19</sup>F NMR (376 MHz, CDCl<sub>3</sub>)  $\delta$  -76.7;

FTIR (cm<sup>-1</sup>): 3412, 2239, 1687, 1635, 1160; mp: 180-182 °C; ESI-MS: 268.1 (M+OH)<sup>+</sup>. HRMS (ESI) m/z calculated for [C<sub>10</sub>H<sub>17</sub>N<sub>3</sub>OF<sub>3</sub>]<sup>+</sup>: 252.13182; found: 252.13130.

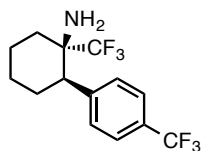

**(30)** To a 25 mL round bottom flask equipped with a magnetic stir bar was added  $\alpha$ -trifluoromethylnitroalkane **21** (75.0 mg, 220  $\mu$ mol), methanol (2.2 mL), and Pd/C (15.0 mg, 20 wt %) The flask was equipped with a rubber septum and a needle was inserted into the septum. The flask was placed in a Parr reactor and evacuated and backfilled with H<sub>2</sub> five times. On the last refill, the reactor was sealed at a H<sub>2</sub> pressure of 400 psi.

The reactor was placed on a stir plate and the reaction was stirred at rt for 24 h. Once complete, the reactor was vented and the crude reaction was diluted with ethyl acetate and filtered through Celite and concentrated *in vacuo* to afford  $\alpha$ -trifluoromethylamine **30** (66.8 mg, 98%) as a thick colorless oil. NMR analysis revealed a >99:1 mixture of syn and anti isomers: <sup>1</sup>H NMR (400 MHz, CDCl<sub>3</sub>)  $\delta$  7.57 (d, *J* = 8.1 Hz, 2H), 7.34 (d, *J* = 8.1 Hz, 2H), 5.62 (s, 1H), 4.30 (s, 1H), 3.13 (dd, *J* = 13.0, 3.7 Hz, 1H), 2.57 (ddd, *J* = 13.4, 4.7, 3.0 Hz, 1H), 2.16 (qd, *J* = 13.2, 3.8 Hz, 1H), 2.00 - 1.87 (m, 1H), 1.83 - 1.39 (m, 5H); <sup>13</sup>C NMR (101 MHz, CDCl<sub>3</sub>)  $\delta$  144.8, 129.5 (q, *J* = 30.2 Hz), 129.3, 127.0 (q, *J* = 288 Hz), 125.4 (q, *J* = 3.53 Hz), 124.2 (q, *J* = 273 Hz), 64.9 (q, *J* = 22.3), 46.3, 29.1, 26.3, 26.1, 20.3; <sup>19</sup>F NMR (565 MHz, CDCl<sub>3</sub>)  $\delta$  -69.5, -78.5; FTIR (cm<sup>-1</sup>): 3307, 2943, 2865, 1166, 1120; GC/MS (EI) 310.1 (M-H)<sup>+</sup>. HRMS (CI) m/z, calculated for [C<sub>14</sub>H<sub>16</sub>NF<sub>6</sub>]<sup>+</sup>: 312.1187; found: 312.1190.

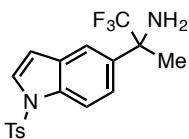

**(31)** To a 25 mL round bottom flask equipped with a magnetic stir bar was added  $\alpha$ -trifluoromethylnitroalkane **8** (100 mg, 242  $\mu$ mol), Pearlman's catalyst (10 mg, 10 wt %), and methanol (2.42 mL). The flask was equipped with a rubber septum and a needle was inserted into the septum. The flask was placed in a Parr reactor and evacuated and backfilled with H<sub>2</sub> five times. On the last refill, the reactor was sealed at a H<sub>2</sub> pressure of 200 psi.

The reactor was placed on a stir plate and the reaction was stirred at rt for 16 h. Once complete, the reactor was vented and the crude reaction was diluted with ethyl acetate, filtered through Celite and concentrated *in vacuo*. The crude reaction was purified via flash silica chromatography (80:20 hexanes : ethyl acetate) to afford  $\alpha$ -trifluoromethylamine **31** (60.1 mg, 65%) as a white solid: <sup>1</sup>H NMR (400 MHz, CDCl<sub>3</sub>)  $\delta$  7.98 (d, *J* = 8.9 Hz, 1H), 7.81 - 7.75 (m, 3H), 7.59 (d, *J* = 3.6 Hz, 1H), 7.55 (d, *J* = 8.7 Hz, 1H), 7.24 (d, *J* = 8.3 Hz, 2H), 6.67 (d, *J* = 3.5 Hz, 1H), 5.48 (d, *J* = 3.5 Hz, 1H), 4.48 (d, *J* = 3.6 Hz, 1H), 2.35 (s, 3H), 1.79 (s, 3H); <sup>13</sup>C NMR (101 MHz, CDCl<sub>3</sub>)  $\delta$  145.3, 135.3, 134.6, 131.4, 130.9, 130.1, 127.1, 127.0, 126.2 (*J* = 285 Hz), 123.7, 120.7, 113.5, 109.1, 66.5 (q, *J* = 23.7 Hz), 21.8, 18.8; <sup>19</sup>F NMR (376 MHz, CDCl<sub>3</sub>)  $\delta$  -74.1; FTIR (cm<sup>-1</sup>): 3422, 2923, 1371, 1170, 1132; mp = 93-95 °C; HRMS (LIFDI) m/z calculated for [C<sub>18</sub>H<sub>17</sub>N<sub>2</sub>O<sub>2</sub>F<sub>3</sub>S]<sup>+</sup>: 382.0963; found: 382.1037.

## 9. Determination of Relative Stereochemistry of S12

The relative stereochemistry was determined by X-ray after converting compound **20** into hydroxylamine **S12**.

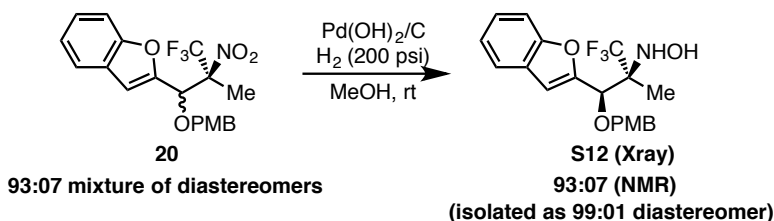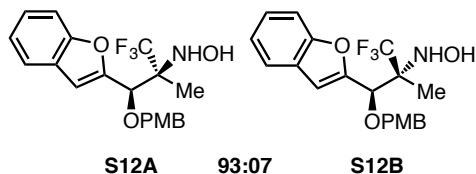

**(S12)** To a 50 mL round bottom flask equipped with a magnetic stir bar was added  $\alpha$ -trifluoromethylnitroalkane **20** (825 mg, 2.0 mmol), Pearlman's catalyst (165 mg, 20 wt %), and methanol (20.0 mL). The flask was equipped with a rubber septum and a needle was inserted into the septum. The flask was placed in a Parr reactor was purged with H<sub>2</sub> five times. On the last refill, the reactor was sealed at a H<sub>2</sub> pressure of 200 psi. The reactor was placed on a stir plate and the reaction was stirred at rt for 20 h. Once complete, the reactor was vented and the crude reaction

was diluted with ethyl acetate and filtered through Celite and concentrated *in vacuo*. The crude reaction was purified via flash silica chromatography (80:20 hexanes : ethyl acetate) to afford **S12** (60.1 mg, 65%) as a white solid.



was diluted with ethyl acetate, filtered through Celite and concentrated *in vacuo*. NMR analysis of the crude reaction mixture revealed an 93:07 mixture of syn and anti isomers. The crude reaction was purified via flash silica chromatography (90:10 hexanes : ethyl acetate) to afford  $\alpha$ -trifluoromethylhydroxylamine **S12** (551 mg, 70%) as a white solid:  $^1\text{H}$  NMR (600 MHz,  $\text{CDCl}_3$ )  $\delta$  7.60 (d,  $J$  = 6.0 Hz, 1H), 7.52 (d,  $J$  = 7.0 Hz, 1H), 7.32 (td,  $J$  = 8.4, 7.2, 1.4 Hz, 1H), 7.27 (d, 1H), 7.25 – 7.22 (m, 2H), 6.90 – 6.84 (m, 2H), 6.83 (s, 1H), 5.39 (d,  $J$  = 3.5 Hz, 1H), 5.20 (s, 1H), 4.65 (d,  $J$  = 3.4 Hz, 1H), 4.56 (d,  $J$  = 11.1 Hz, 1H), 4.37 (d,  $J$  = 11.1 Hz, 1H), 3.80 (s, 3H), 1.31 (s, 3H).  $^{13}\text{C}$  NMR (151 MHz,  $\text{CDCl}_3$ )  $\delta$  159.6, 155.3, 153.4, 129.8, 129.3, 127.9, 126.5 (q,  $J$  = 288 Hz), 124.7, 123.3, 121.3, 113.9, 111.6, 107.4, 73.8, 71.9, 66.9 (q,  $J$  = 24 Hz), 55.4, 13.2.  $^{19}\text{F}$  NMR (565 MHz,  $\text{CDCl}_3$ )  $\delta$  -71.9; FTIR ( $\text{cm}^{-1}$ ): 3282, 2937, 2837, 1612, 1585, 1514, 1613, 1566, 1453, 1251, 752; mp = 97-99 °C; HRMS (ESI) ( $\text{M-H}$ ) $^+$   $m/z$  calculated for  $[\text{C}_{20}\text{H}_{21}\text{NO}_4\text{F}_3]$ : 396.14357; found: 396.14172; Crystals for X-ray analysis were obtained by slow evaporation of diethylether.

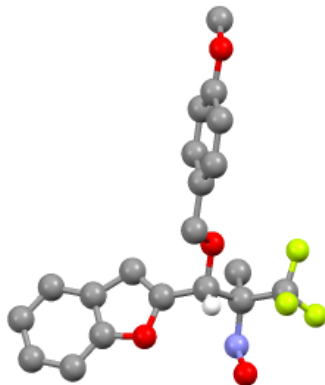

#### 10. X-ray Structural Solution and Refinement:

X-ray structural analysis for **15**, **21** and **S12**: Crystals were mounted using viscous oil onto a plastic mesh and cooled to the data collection temperature. Data was collected on a Bruker-AXS APEX II DUO CCD diffractometer with Mo-K $\alpha$  radiation ( $\lambda$  = 0.71073 Å) monochromated with graphite for **15** and **21**, and with Cu-K $\alpha$  radiation ( $\lambda$  = 1.54178 Å) focused with Goebel mirrors for **S12**. Unit cell parameters were obtained from 36 data frames, 0.5°  $\omega$ , from three different sections of the Ewald sphere. The systematic absences in the diffraction data are uniquely consistent with *Pbca* for **15**, *P2<sub>1</sub>/c* for **21**, and *P2<sub>1</sub>/n* for **S12**. The datasets were treated with multi-scan absorption corrections<sup>16</sup>. The structures were solved using direct methods and refined with full-matrix, least-squares procedures on  $F^2$ <sup>17</sup>. Four symmetry unique compound molecules were located in the asymmetric unit of **21** different from each only in C-C and C-N single bond rotations of the  $-\text{CF}_3$  and  $-\text{NO}_2$  groups, respectively. All non-hydrogen atoms were refined with anisotropic displacement parameters. The amine H-atoms in **15** and **S12** were located from the electron density difference map and assigned an idealized fixed N-H distance of 0.87(2) Å with  $U_{\text{iso}}$  equal to 1.2  $U_{\text{eq}}$  of the attached nitrogen atom. All other hydrogen atoms were treated as idealized contributions with geometrically calculated positions and with  $U_{\text{iso}}$  equal to 1.2, or 1.5 for methyl,  $U_{\text{eq}}$  of the attached atom. Atomic scattering factors are contained in various versions of the SHELXTL program library<sup>17</sup>. Structural information has been deposited with the Cambridge Structural Crystallographic Centre under depositary numbers CCDC 1411931 for **15**, CCDC 1411932 for **21**, and CCDC 1532771 for **S12**.

## 11. Deprotonation Studies:

To understand the kinetics of deprotonation of **1** Starting material, we treated **1** with DBU in  $\text{CD}_2\text{Cl}_2$  at  $-25\text{ }^\circ\text{C}$ . We monitored the reaction using  $^1\text{H}$  NMR spectroscopy.

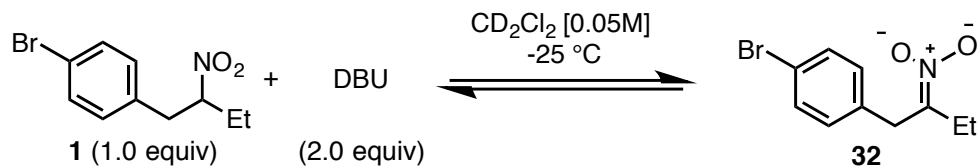

In a nitrogen-filled glove-box to a 1 dram vial was added **1** (9 mg, 0.035 mmol), hexamethyldisiloxane (3.7  $\mu\text{L}$ , 17.5  $\mu\text{mol}$ ) (internal standard)  $\text{CD}_2\text{Cl}_2$  (0.7mL, [0.05 M]) This solution was transferred to a NMR tube via pipette, sealed with septa cap and removed from the glovebox. The sample was cooled to  $-25\text{ }^\circ\text{C}$  in NMR probe. DBU (11  $\mu\text{L}$ , 70.0  $\mu\text{mol}$ ) was added at  $-25\text{ }^\circ\text{C}$  by quickly removing the sample from the NMR probe and the data were collected at  $-25\text{ }^\circ\text{C}$  in 400 MHz NMR incrementally for 30 min. Yield of starting material **1** and nitronate anion **32** was determined by integrating signals shown in the table below:

| Compound  | $^1\text{H}$ NMR signal              |
|-----------|--------------------------------------|
| <b>1</b>  | $\delta$ 7.42 (d, $J = 8.1$ Hz, 2H), |
| <b>32</b> | $\delta$ 7.33 (d, $J = 8.1$ Hz, 2H), |

Compound **1** equilibrates to nitronate anion **32** with approximate ratio of 67:33 in ten minutes. As shown in the tableS3. The ratio of **1**:**32** is shown in the chart below as a function of time.

| Time(min) | Yield <b>1</b> <sup>a</sup> | Nitronate anion <b>32</b> <sup>a</sup> |
|-----------|-----------------------------|----------------------------------------|
| 0         | 100                         | 0                                      |
| 3         | 86                          | 16                                     |
| 6         | 74                          | 30                                     |
| 9         | 68                          | 35                                     |
| 12        | 65                          | 37                                     |
| 15        | 66                          | 37                                     |
| 18        | 65                          | 37                                     |
| 21        | 64                          | 37                                     |
| 24        | 65                          | 37                                     |
| 27        | 67                          | 36                                     |
| 30        | 69                          | 36                                     |

<sup>a</sup>Yield determined by  $^1\text{H}$  NMR using hexamethyldisiloxane as an internal standard

TableS3: Yield of **1** and Nitronate anion **32** over time using DBU as base

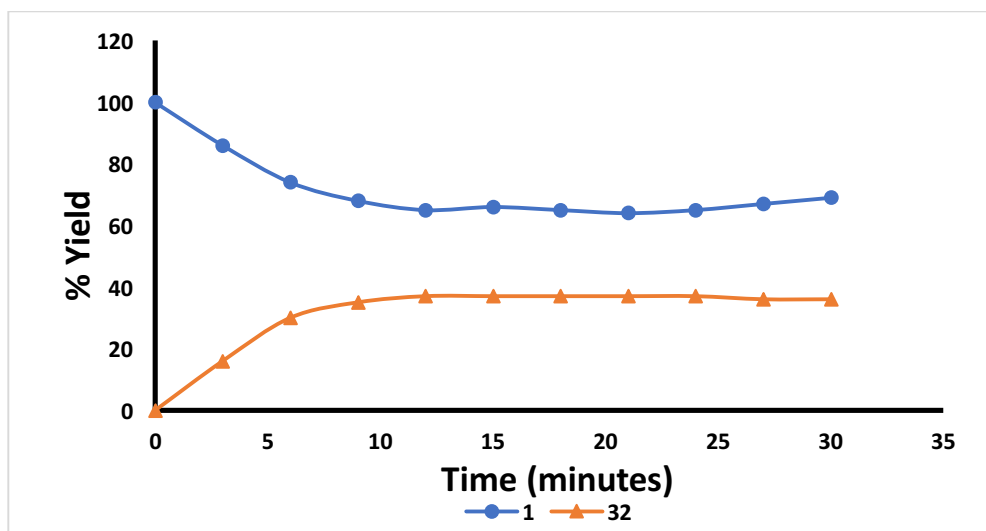

ChartS1: Ratio of compound 1 and Nitronate anion 32 over time

From this experiment, we learn that a substantial concentration of nitronate anion is formed under these conditions, but that the kinetic for formation are relatively slow.

## 12. Interaction of DBU with Umemoto's Reagent – $^1\text{H}$ NMR study.

To understand possible interactions between DBU and Umemoto's reagent, we studied their reaction by  $^1\text{H}$  NMR at  $-25\text{ }^\circ\text{C}$  in  $\text{CD}_2\text{Cl}_2$  in the absence of other reagents.

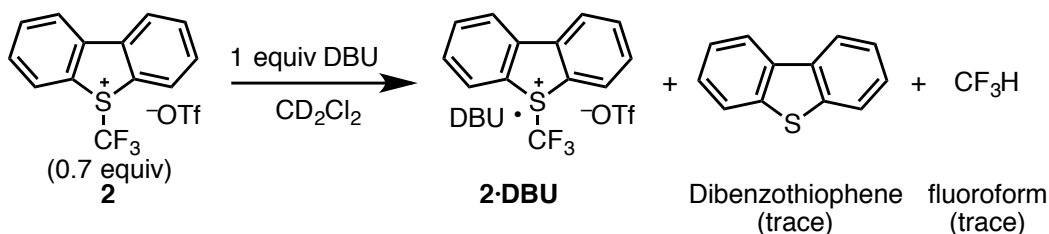

In a nitrogen-filled glove-box to a 1 dram vial was added, Umemoto's reagent **2** (0.0183 mg, 0.045 mmol), hexamethyldisiloxane (3.7  $\mu\text{L}$ , 17.5  $\mu\text{mol}$ ) (internal standard)  $\text{CD}_2\text{Cl}_2$  (0.7mL, [0.05 M]). This solution was transferred to a NMR tube via pipette, sealed with septa cap and removed from the glovebox. The sample was cooled to  $-25\text{ }^\circ\text{C}$  in NMR probe. DBU (11  $\mu\text{L}$ , 70.0  $\mu\text{mol}$ ) was added at  $-25\text{ }^\circ\text{C}$  by quickly removing the sample from the NMR probe and the data were collected at  $-25\text{ }^\circ\text{C}$ .

From the  $^1\text{H}$  NMR spectra we observed the complete disappearance of Umemoto's reagent and formation of new adduct, which we believe to be EDA complex of the two (**2-DBU**), along with traces of dibenzothiophene, and fluorofrom. The conversion happens within seconds, and the resulting solution is stable at  $-25\text{ }^\circ\text{C}$  for extended time (as judged by  $^1\text{H}$  NMR).  $^1\text{H}$  NMR signals are tabulated below.

| Compound                   | <sup>1</sup> H NMR signal                                                                                                                             |
|----------------------------|-------------------------------------------------------------------------------------------------------------------------------------------------------|
| dibenzothiophene           | δ 8.19 (dd, <i>J</i> = 6.0, 3.2 Hz, 2H), 7.88 (dt, <i>J</i> = 7.1, 3.6 Hz, 2H), 7.53 – 7.42 (m, 4H)                                                   |
| CF <sub>3</sub> H          | δ 6.61 (q, <i>J</i> = 79, 1H)                                                                                                                         |
| Umemoto's reagent <b>2</b> | δ 8.40 (d, <i>J</i> = 8.1 Hz, 2H), 8.23 (td, <i>J</i> = 7.8, 1.2 Hz, 2H), 8.03 (td, <i>J</i> = 7.7, 1.1 Hz, 2H) 7.82 (td, <i>J</i> = 7.9, 1.3 Hz, 2H) |
| 2·DBU                      | δ 8.28 (d, <i>J</i> = 8.1 Hz, 2H) 8.23 (d, <i>J</i> = 7.8 Hz, 2H) 7.99 (t, <i>J</i> = 7.7 Hz, 2H) 7.79 (t, <i>J</i> = 7.8 Hz, 2H)                     |

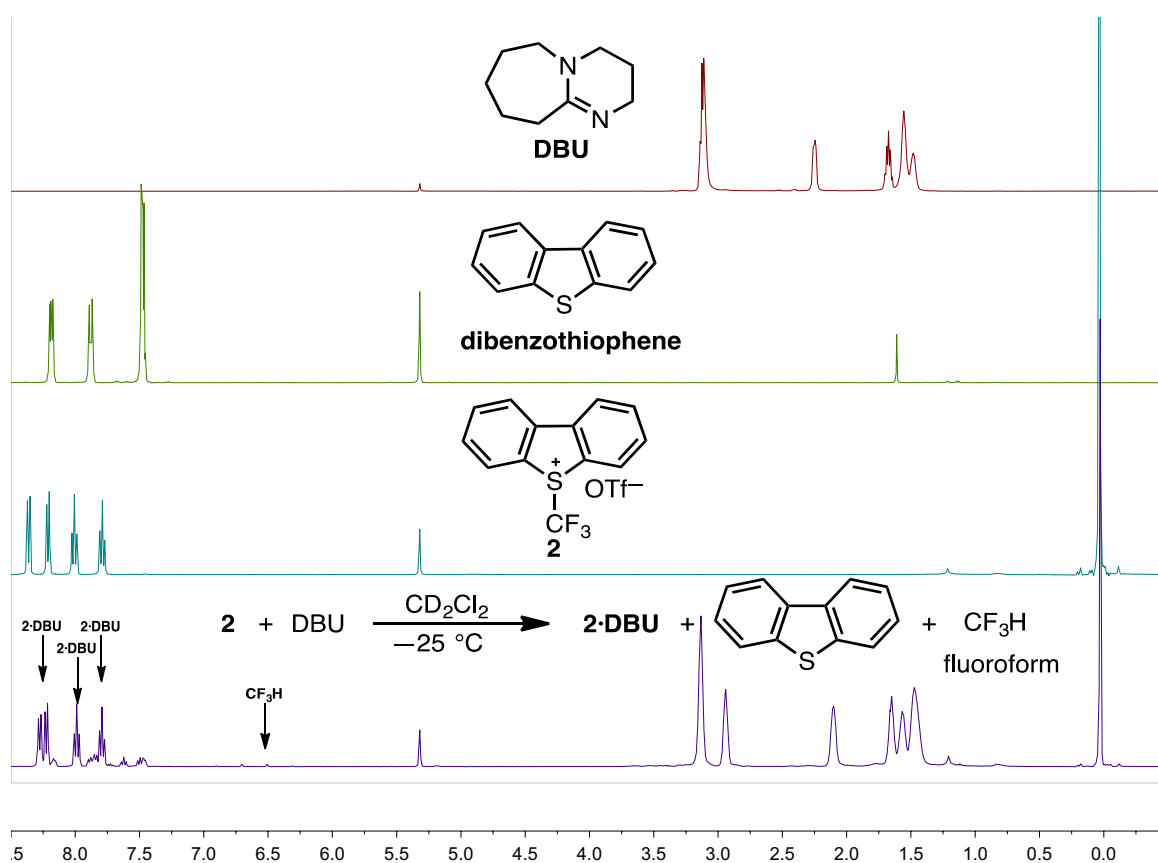

FigureS1: <sup>1</sup>H NMR study of Interaction between Umemoto's reagent **2** and **DBU**, 0.05 M CD<sub>2</sub>Cl<sub>2</sub>, -25 °C, compared to spectra of reagents and products under the same conditions.

From this data, we find that: (1) a DBU adduct of Umemoto's reagent can form; (2) the reaction kinetics are fast; (3) we are able to identify its <sup>1</sup>H NMR signals for use in the studies below.

### 13. $^1\text{H}$ NMR Monitoring of Trifluoromethylation of Secondary Nitroalkane:

We monitored trifluoromethylation of nitroalkane reaction using  $^1\text{H}$  NMR at  $-25\text{ }^\circ\text{C}$  in  $\text{CD}_2\text{Cl}_2$ . Under the optimized reaction conditions [0.1 M], a very rapid reaction was observed that was too fast to adequately monitor by NMR. Spectra traces from this reaction are shown below. Further, the optimized reaction conditions are slightly heterogeneous for the first few minutes of the transformation, due to the saturation of Umemoto's reagent in methylene chloride at the reaction temperature. We were concerned that such heterogeneous behavior might obscure the reaction profile due to mass transport issues. To address both problems, we diluted the reaction (2-fold, to 0.05 M) for NMR studies. Under these conditions, the reaction slowed enough to allow better observation by transient NMR experiments, and was fully homogenous at the start of the reaction.

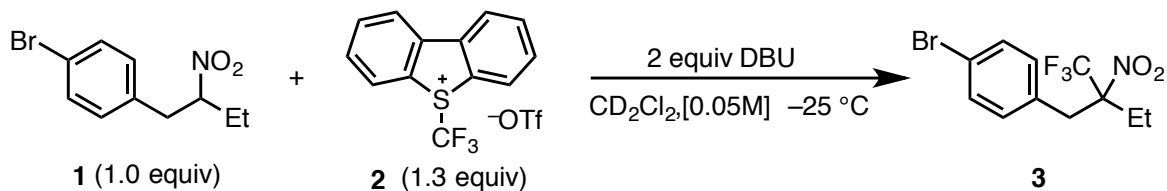

In a nitrogen-filled glovebox to a 1 dram vial was added **1** (9 mg, 0.035 mmol), Umemoto's reagent **2** (0.0183 mg, 0.045 mmol), hexamethyldisiloxane (3.7  $\mu\text{L}$ , 17.5  $\mu\text{mol}$ ) (internal standard) and  $\text{CD}_2\text{Cl}_2$  (0.7mL, [0.05 M]). This solution was transferred to a NMR tube via pipette, sealed with septa cap and removed from the glove box. The sample was cooled to  $-25\text{ }^\circ\text{C}$  in NMR probe. DBU (11  $\mu\text{L}$ , 70.0  $\mu\text{mol}$ ) was added at  $-25\text{ }^\circ\text{C}$  by quickly removing the sample from the NMR probe and the data started to collect at  $-25\text{ }^\circ\text{C}$ .

Data were collected periodically for first 30 minutes then, collected for every 30 minutes. Yield of starting material **1**, product **3**, **2·DBU** and **33** was determined by integrating signals shown in the table below:

| Compound  | $^1\text{H}$ NMR signal             |
|-----------|-------------------------------------|
| <b>1</b>  | $\delta$ 0.93 (t, $J = 7.4$ Hz, 3H) |
| <b>3</b>  | $\delta$ 1.01 (t, $J = 7.4$ Hz, 3H) |
| <b>33</b> | $\delta$ 7.27 (d, $J = 7.9$ Hz, 2H) |
| 2·DBU     | $\delta$ 7.73 (t, $J = 7.8$ Hz, 2H) |

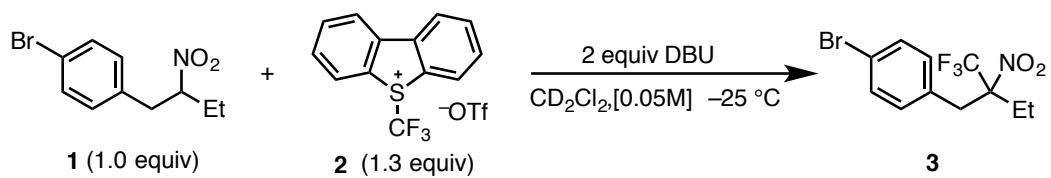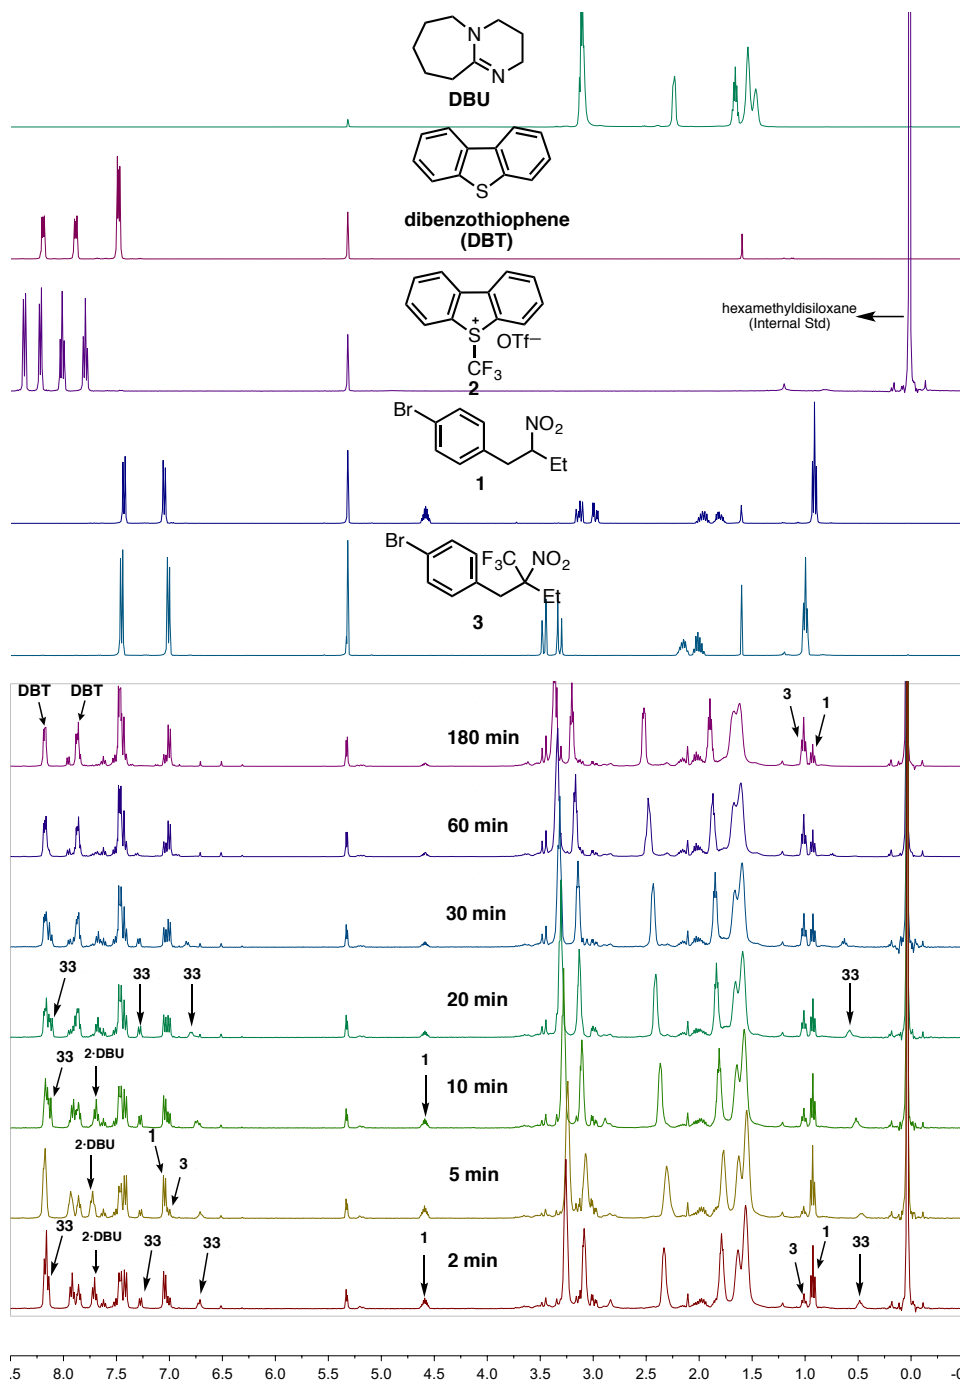

Figure S2:  $^1H$  NMR monitoring of Trifluoromethylation of **1** [0.05] M  $CD_2Cl_2$ ,  $-25^\circ C$ , compared to spectra of reagents and products under the same conditions.

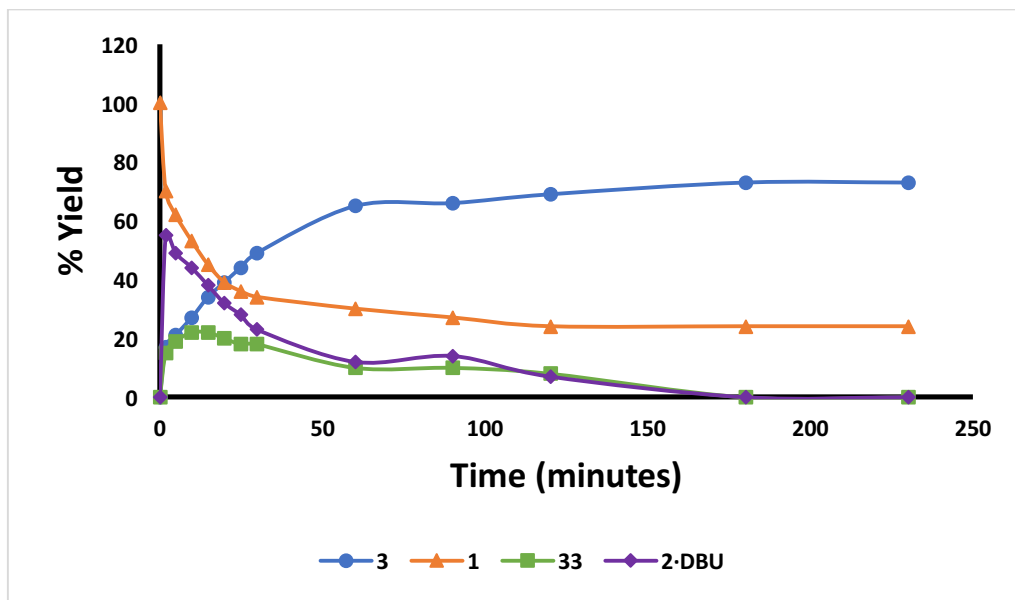

ChartS2: Kinetic Profile of Trifluoromethylation of **1** [0.05 M]  $\text{CD}_2\text{Cl}_2$  and Change of **1,3,33** and **2·DBU** over time.

From the  $^1\text{H}$  NMR time study, we observed formation of product **3** and disappearance of starting material **1**. Further, we also noticed that high concentration buildup of peak at  $\delta$  7.73ppm, a peak that matches **2·DBU**, at the beginning of the reaction then it gradually disappears at the end.

In addition, we also observed another compound with  $^1\text{H}$  NMR signals at  $\delta$  8.13, 7.27, 6.80, 0.6ppm. These rise and fall in together. Further, these signals corresponds to features in the spectra of both the nitroalkane **1** and Umemoto's reagent (**2**), but are not identical to either. Based upon this spectra data, we believe that this intermediate is the associated ion pair **33**, where in the nitronate anion has replaced triflate in Umemoto's reagent .

Based on our NMR study of DBU interaction with Umemoto's reagent we propose that the peak at  $\delta$  7.7ppm is adduct **2·DBU** which is formed between Umemoto's reagent and DBU and the peak at  $\delta$  8.13, 7.27, 6.80, 0.6ppm is an ion pair **33**, which is formed reversibly between **2·DBU** and nitronate anion **32**.

#### 14. $^1\text{H}$ NMR monitoring of Trifluoromethylation of Secondary Nitroalkane (optimal reaction condition):

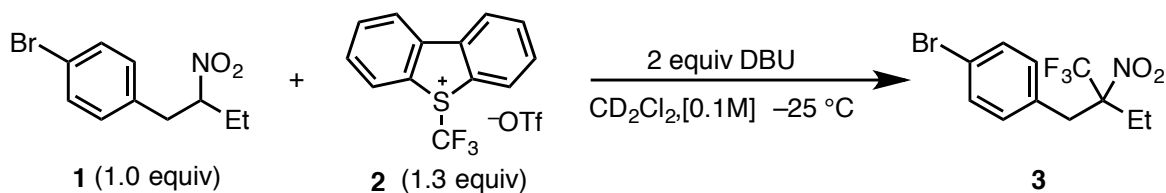

To a 1 dram vial was added **1** (18 mg, 0.070 mmol), Umemoto's reagent **2** (0.0366 mg, 0.090 mmol), 1,3,5 trimethoxy benzene (5.8 mg, 0.035 mmol) added as Internal Standard) (0.7mL, [0.1 M]  $\text{CD}_2\text{Cl}_2$ ). This solution was transferred to a NMR tube via pipette sealed with septa cap and removed from the glove box. The sample was cooled to  $-25^\circ\text{C}$  in NMR probe. DBU (22  $\mu\text{L}$ , 140.0  $\mu\text{mol}$ ) was added at  $-25^\circ\text{C}$  by removing the sample quickly from the NMR probe. Data were collected periodically for first 30 minutes then, collected for every 30 minutes.

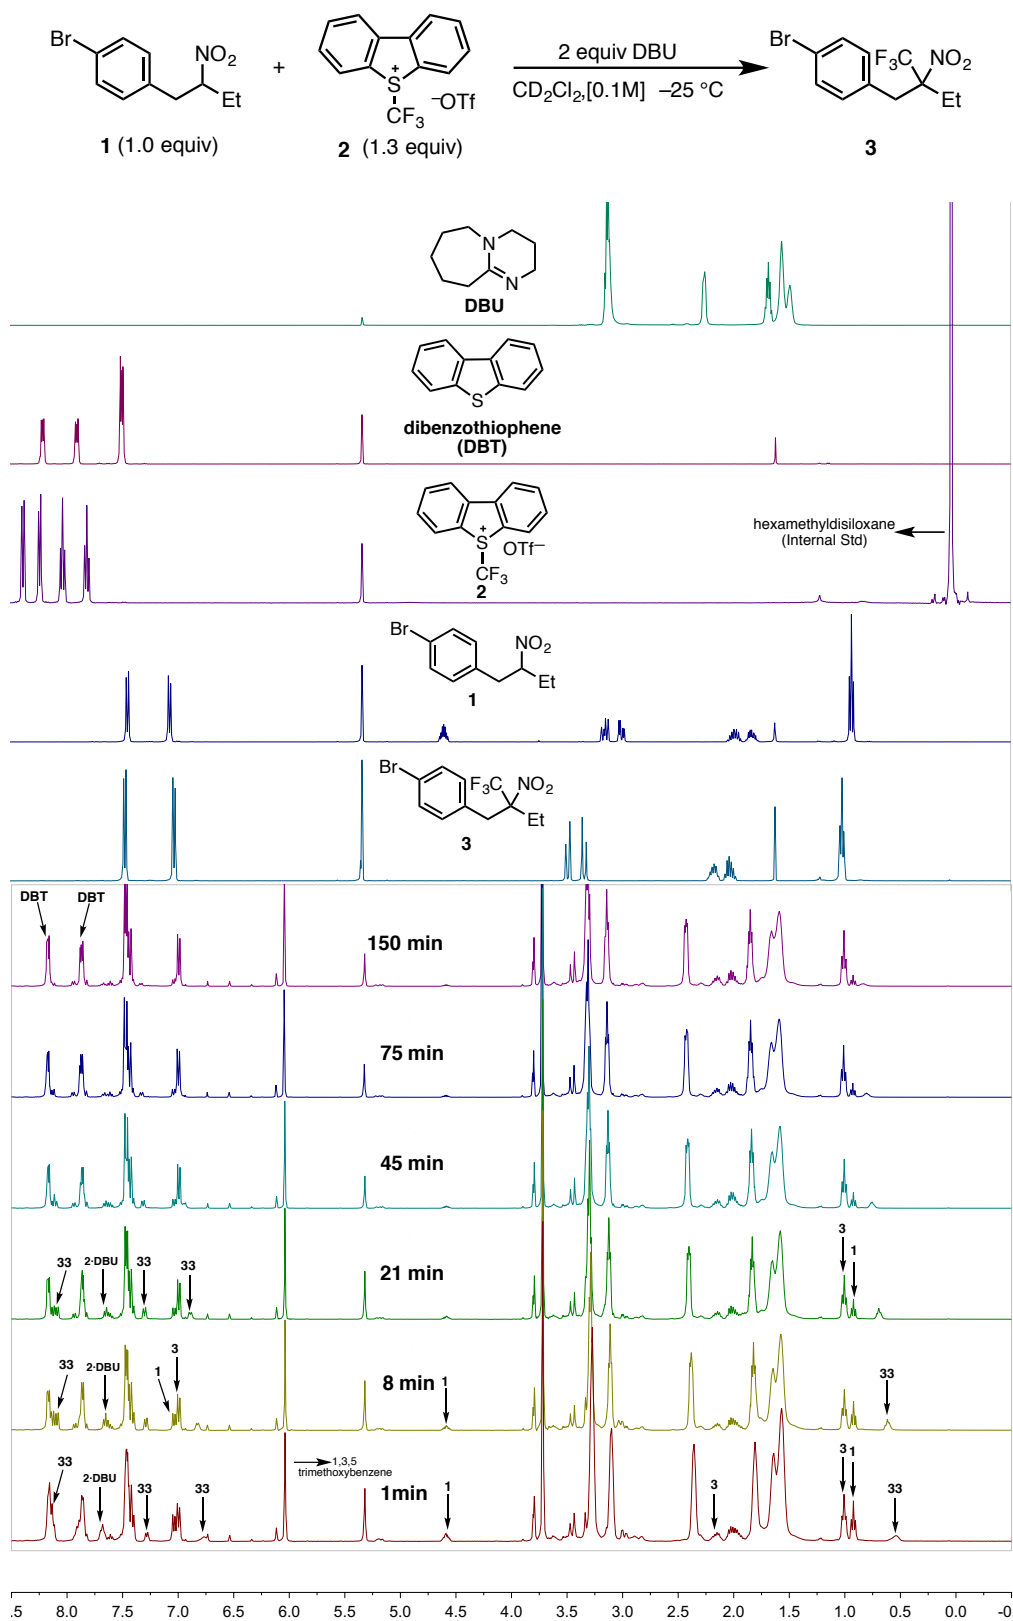

Figure S3:  $^1\text{H}$  NMR monitoring of Trifluoromethylation of **1** [0.1 M]  $\text{CD}_2\text{Cl}_2$ ,  $-25^\circ\text{C}$ , compared to spectra of reagents and products under the same conditions.



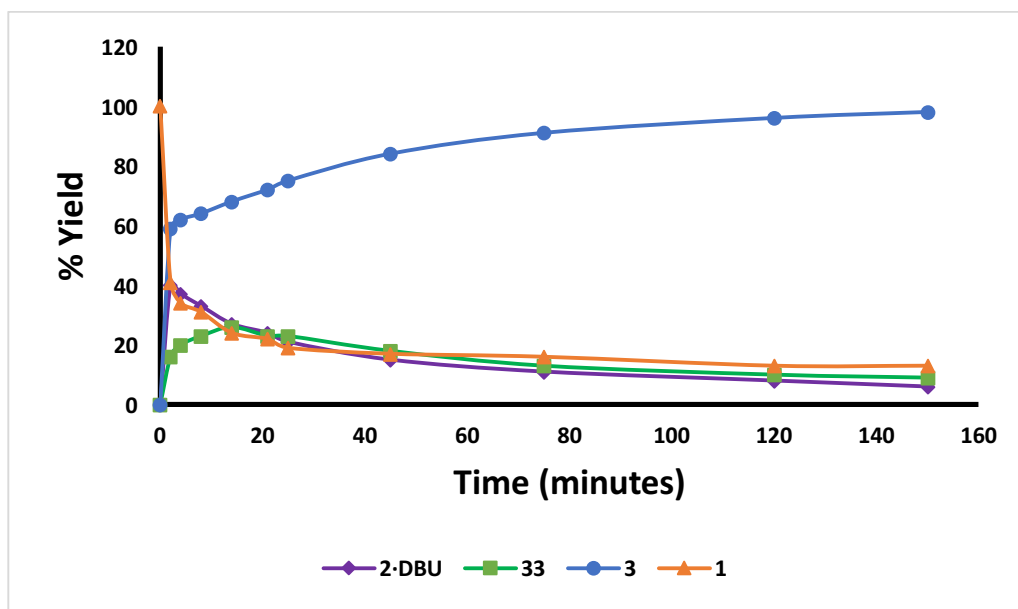

ChartS3: Kinetic Profile of Trifluoromethylation of **1** [0.1 M]  $\text{CD}_2\text{Cl}_2$  and Change of **1,3,33** and **2-DBU** over time

## 15. References

- (1) Pangborn, A. B.; Giardello, M. A.; Grubbs, R. H.; Rosen, R. K.; Timmers, F. J., *Organometallics* **1996**, *15* (5), 1518-1520.
- (2) Ballini, R.; Barboni, L.; Giarlo, G., *J. Org. Chem* **2004**, *69* (20), 6907-6908.
- (3) Bobál, P.; Lightner, D. A., *J. Heterocycl. Chem.* **2001**, *38* (2), 527-530.
- (4) Zhang, H.-Z.; Zhang, H.; Kemnitzer, W.; Tseng, B.; Cinatl, J.; Michaelis, M.; Doerr, H. W.; Cai, S. X., *J. Med. Chem.* **2006**, *49* (3), 1198-1201.
- (5) Budzelaar, Peter H. M.; Moonen, Nicolle N. P.; Gelder, René d.; Smits, Jan M. M.; Gal, Anton W., *Eur. J. Inorg. Chem.* **2000**, *2000* (4), 753-769.
- (6) Gietter, A. A. S.; Gildner, P. G.; Cinderella, A. P.; Watson, D. A., *Org. Lett.* **2014**, *16* (11), 3166-3169.
- (7) Zanon, J.; Klapars, A.; Buchwald, S. L., *J. Am. Chem. Soc.* **2003**, *125* (10), 2890-2891.
- (8) Newkome, G. R.; Kim, H. J.; Moorefield, C. N.; Maddi, H.; Yoo, K.-S., *Macromolecules* **2003**, *36* (12), 4345-4354.
- (9) Gildner, P. G.; Gietter, A. A. S.; Cui, D.; Watson, D. A., *J. Am. Chem. Soc.* **2012**, *134* (24), 9942-9945.
- (10) Hayashi, T.; Senda, T.; Ogasawara, M., *J. Am. Chem. Soc.* **2000**, *122* (43), 10716-10717.
- (11) Vogl, E. M.; Buchwald, S. L., *J. Org. Chem* **2001**, *67* (1), 106-111.
- (12) Ballini, R.; Bosica, G., *Eur. J. Org. Chem.* **1998**, *1998* (2), 355-357.
- (13) Patt, S. L.; Shoolery, J. N., *J. Magn. Reson.* **1982**, *46* (3), 535-539.
- (14) Aleksandrowicz, P.; Piotrowska, H.; Sas, W., *Pol. J. Chem.* **1981**, *55*, 1469.
- (15) Alam, T. M.; Pedrotty, D. M.; Boyle, T. J., *Magn. Reson. Chem.* **2002**, *40* (5), 361-365.
- (16) Apex3 software suite; Bruker AXS, I., Madison, WI, 2015.
- (17) Sheldrick, G., *Acta Cryst.A* **2008**, *64* (1), 112-122.

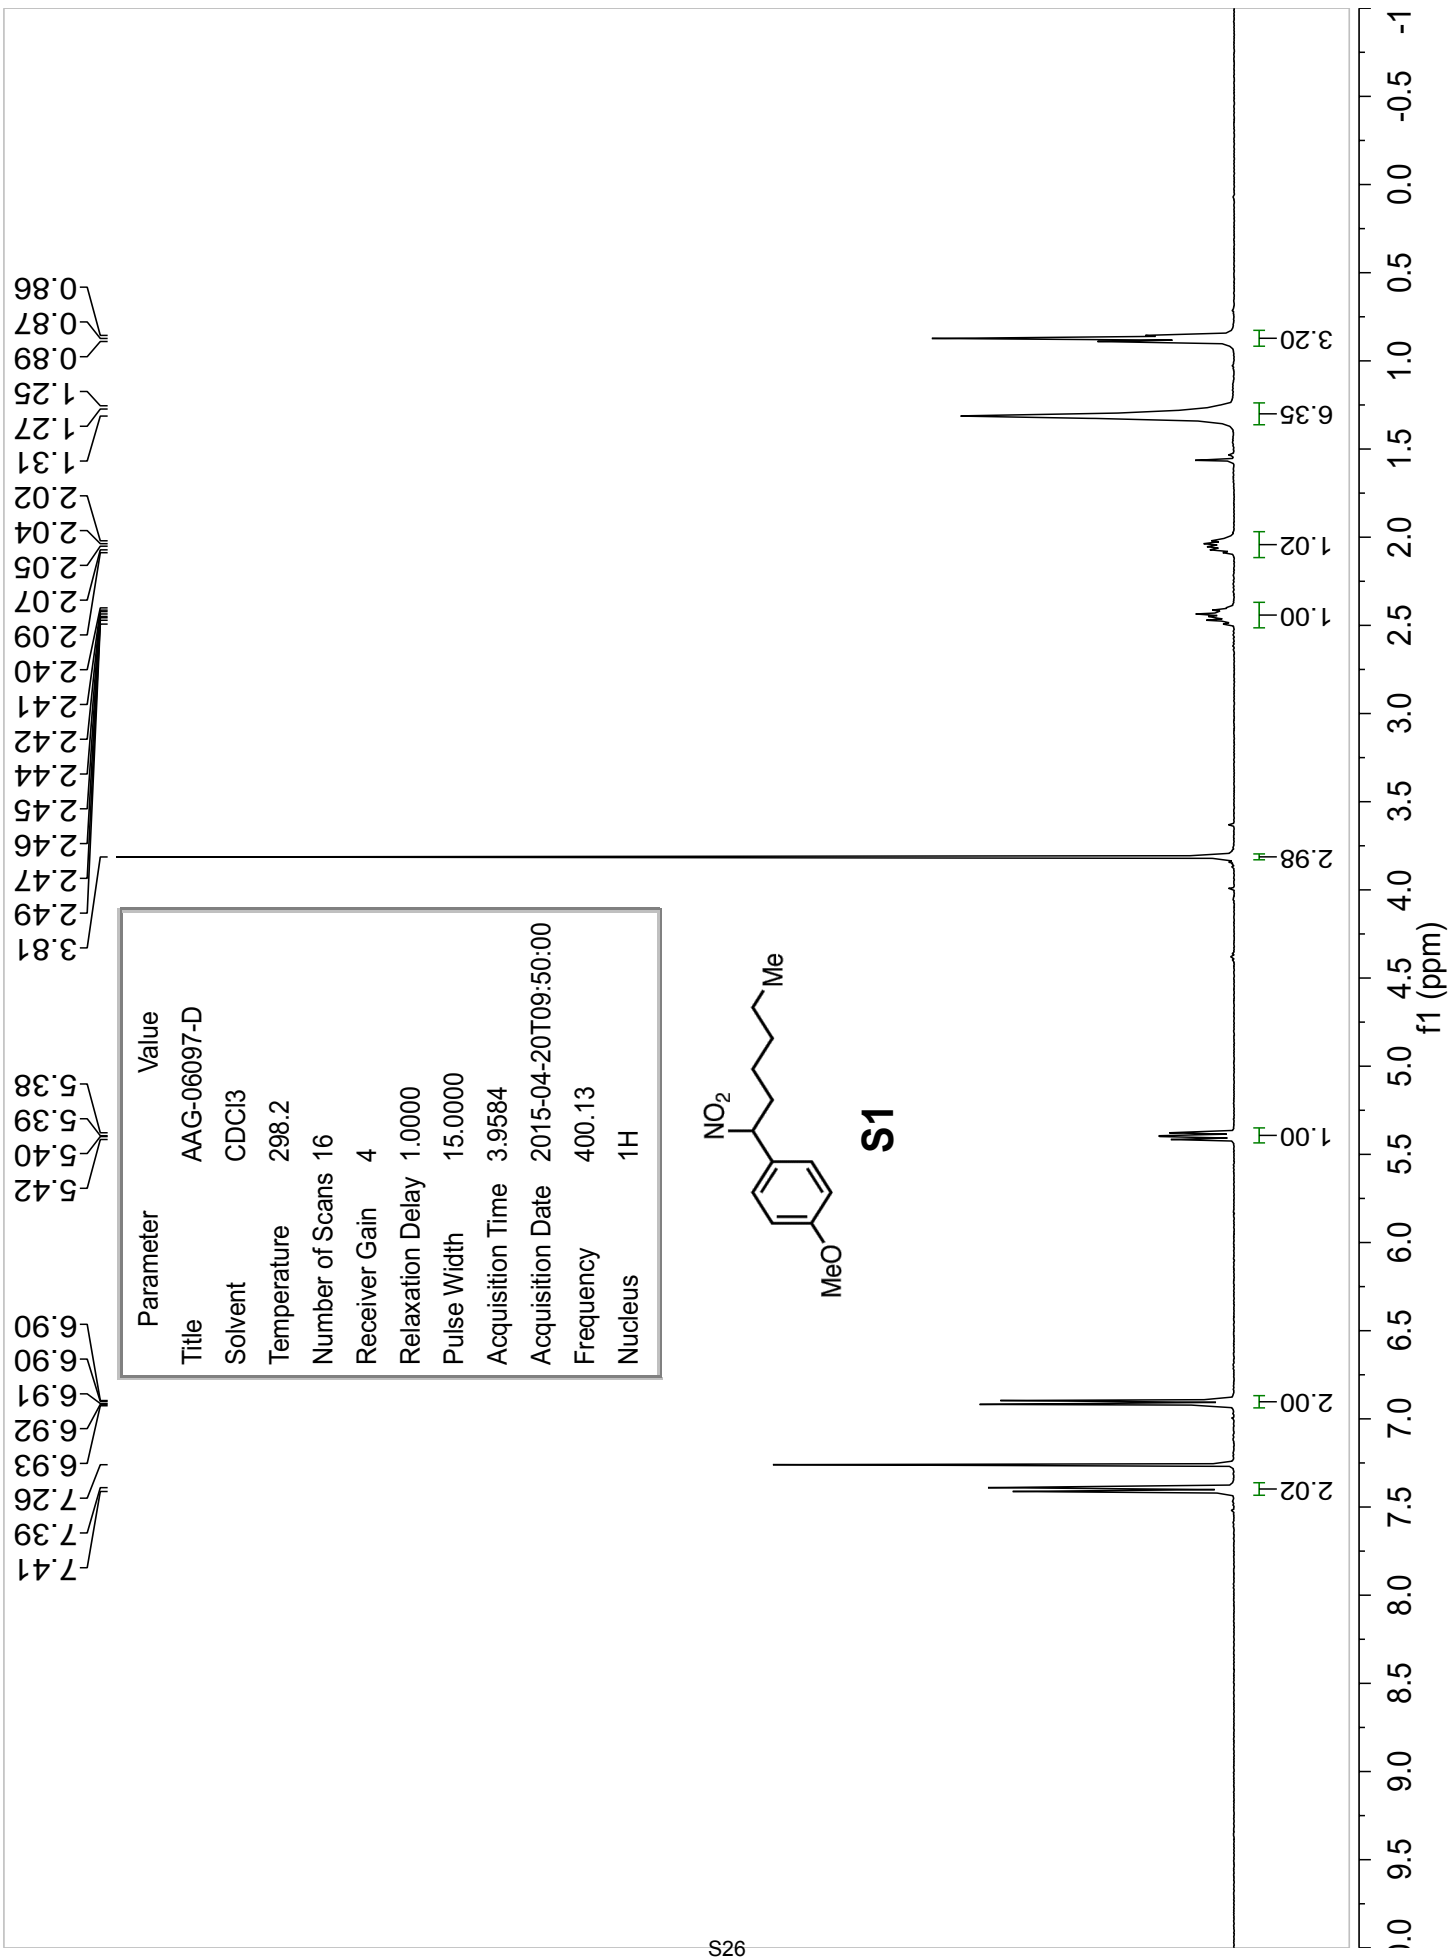

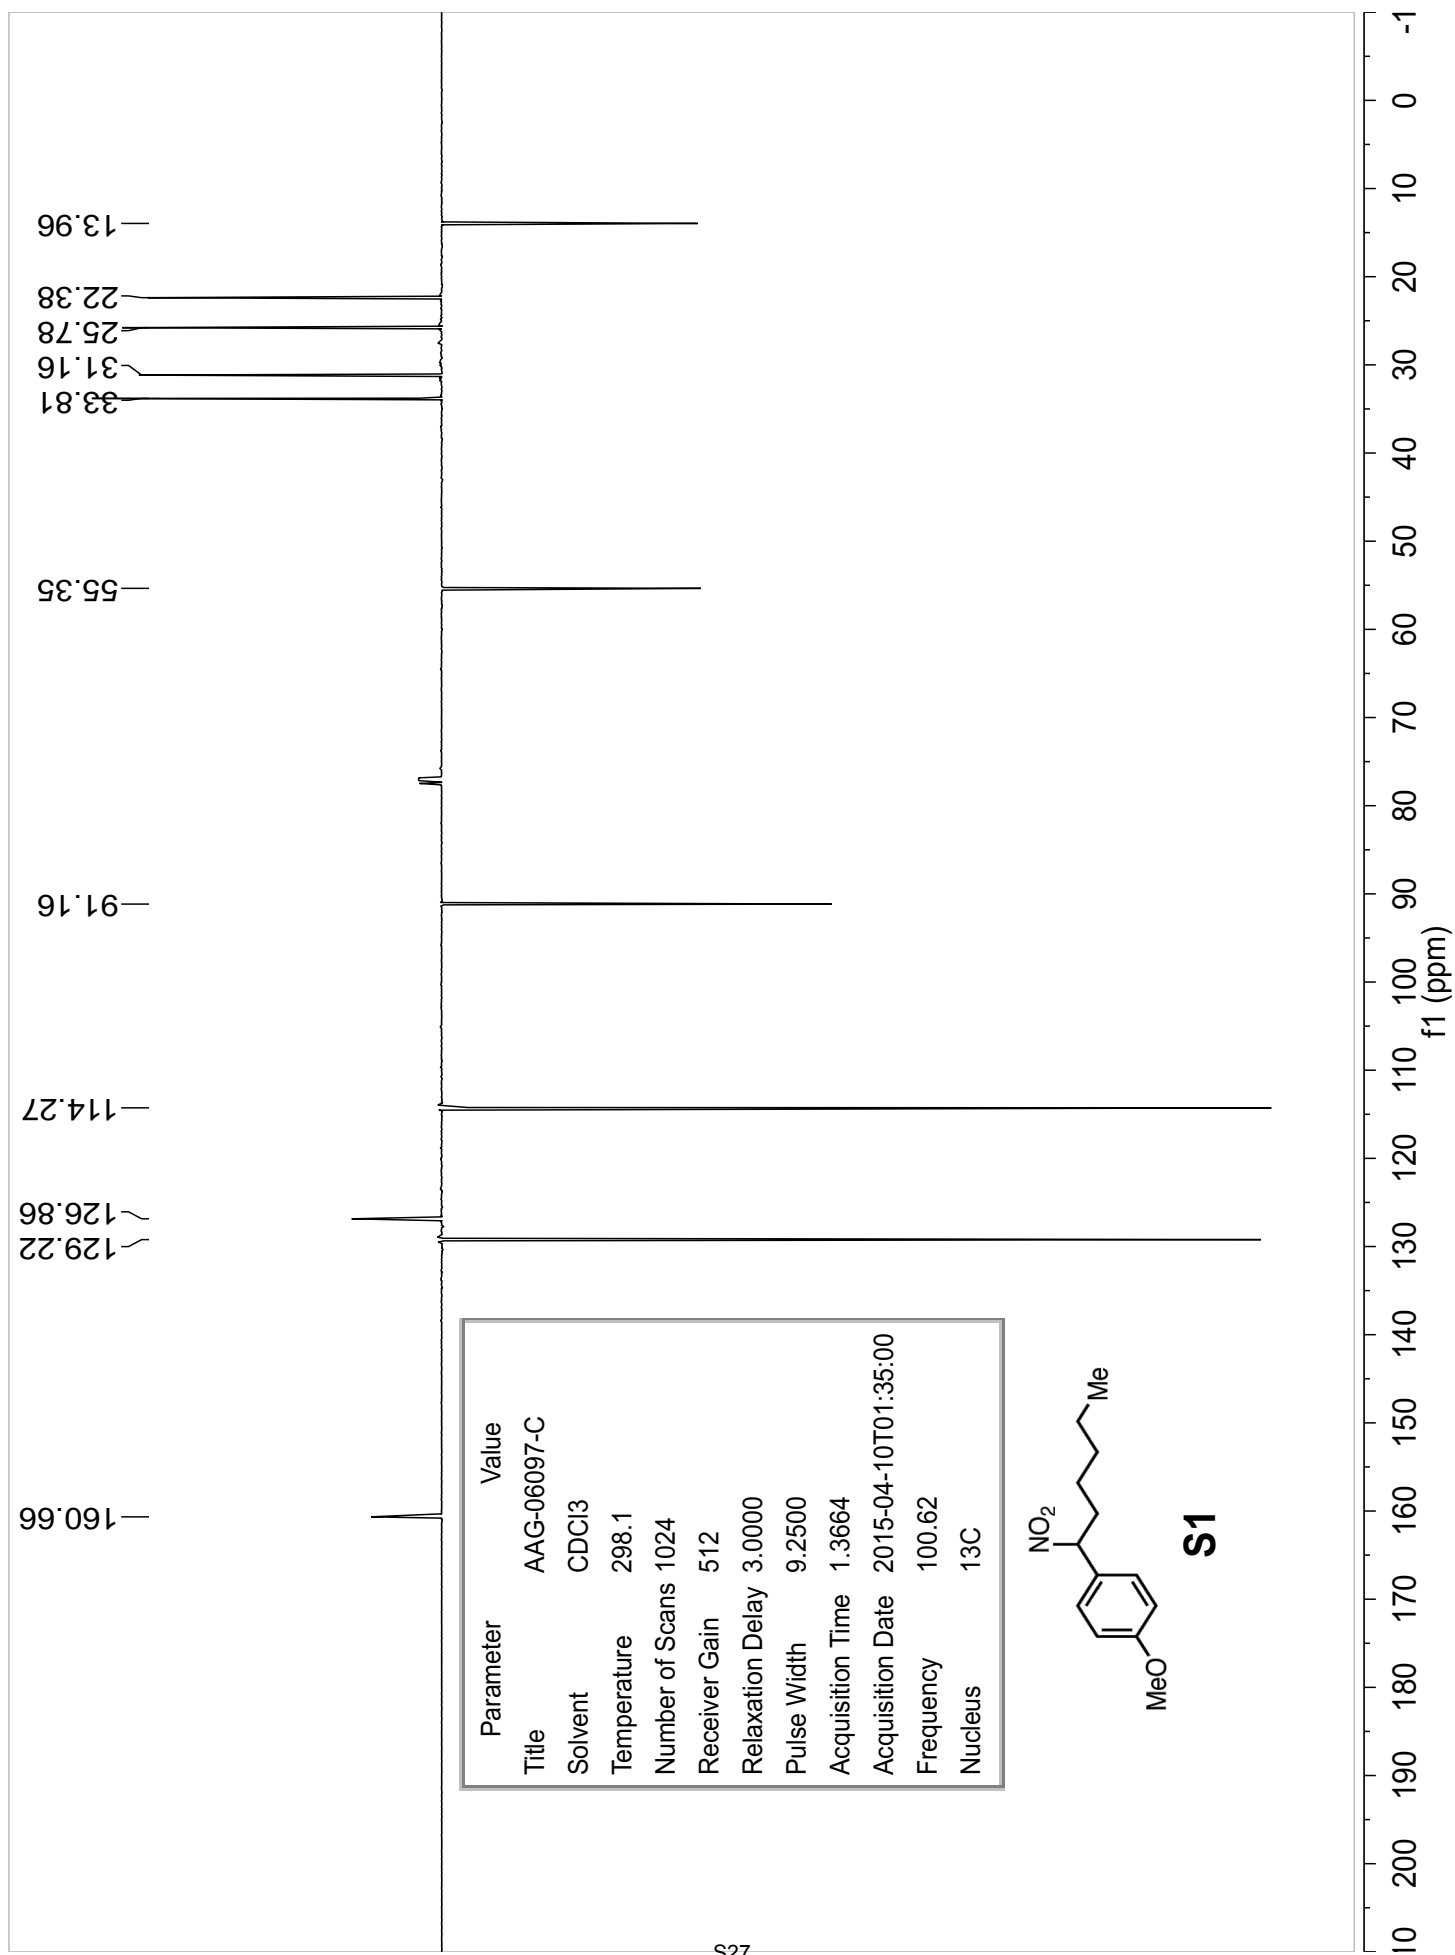

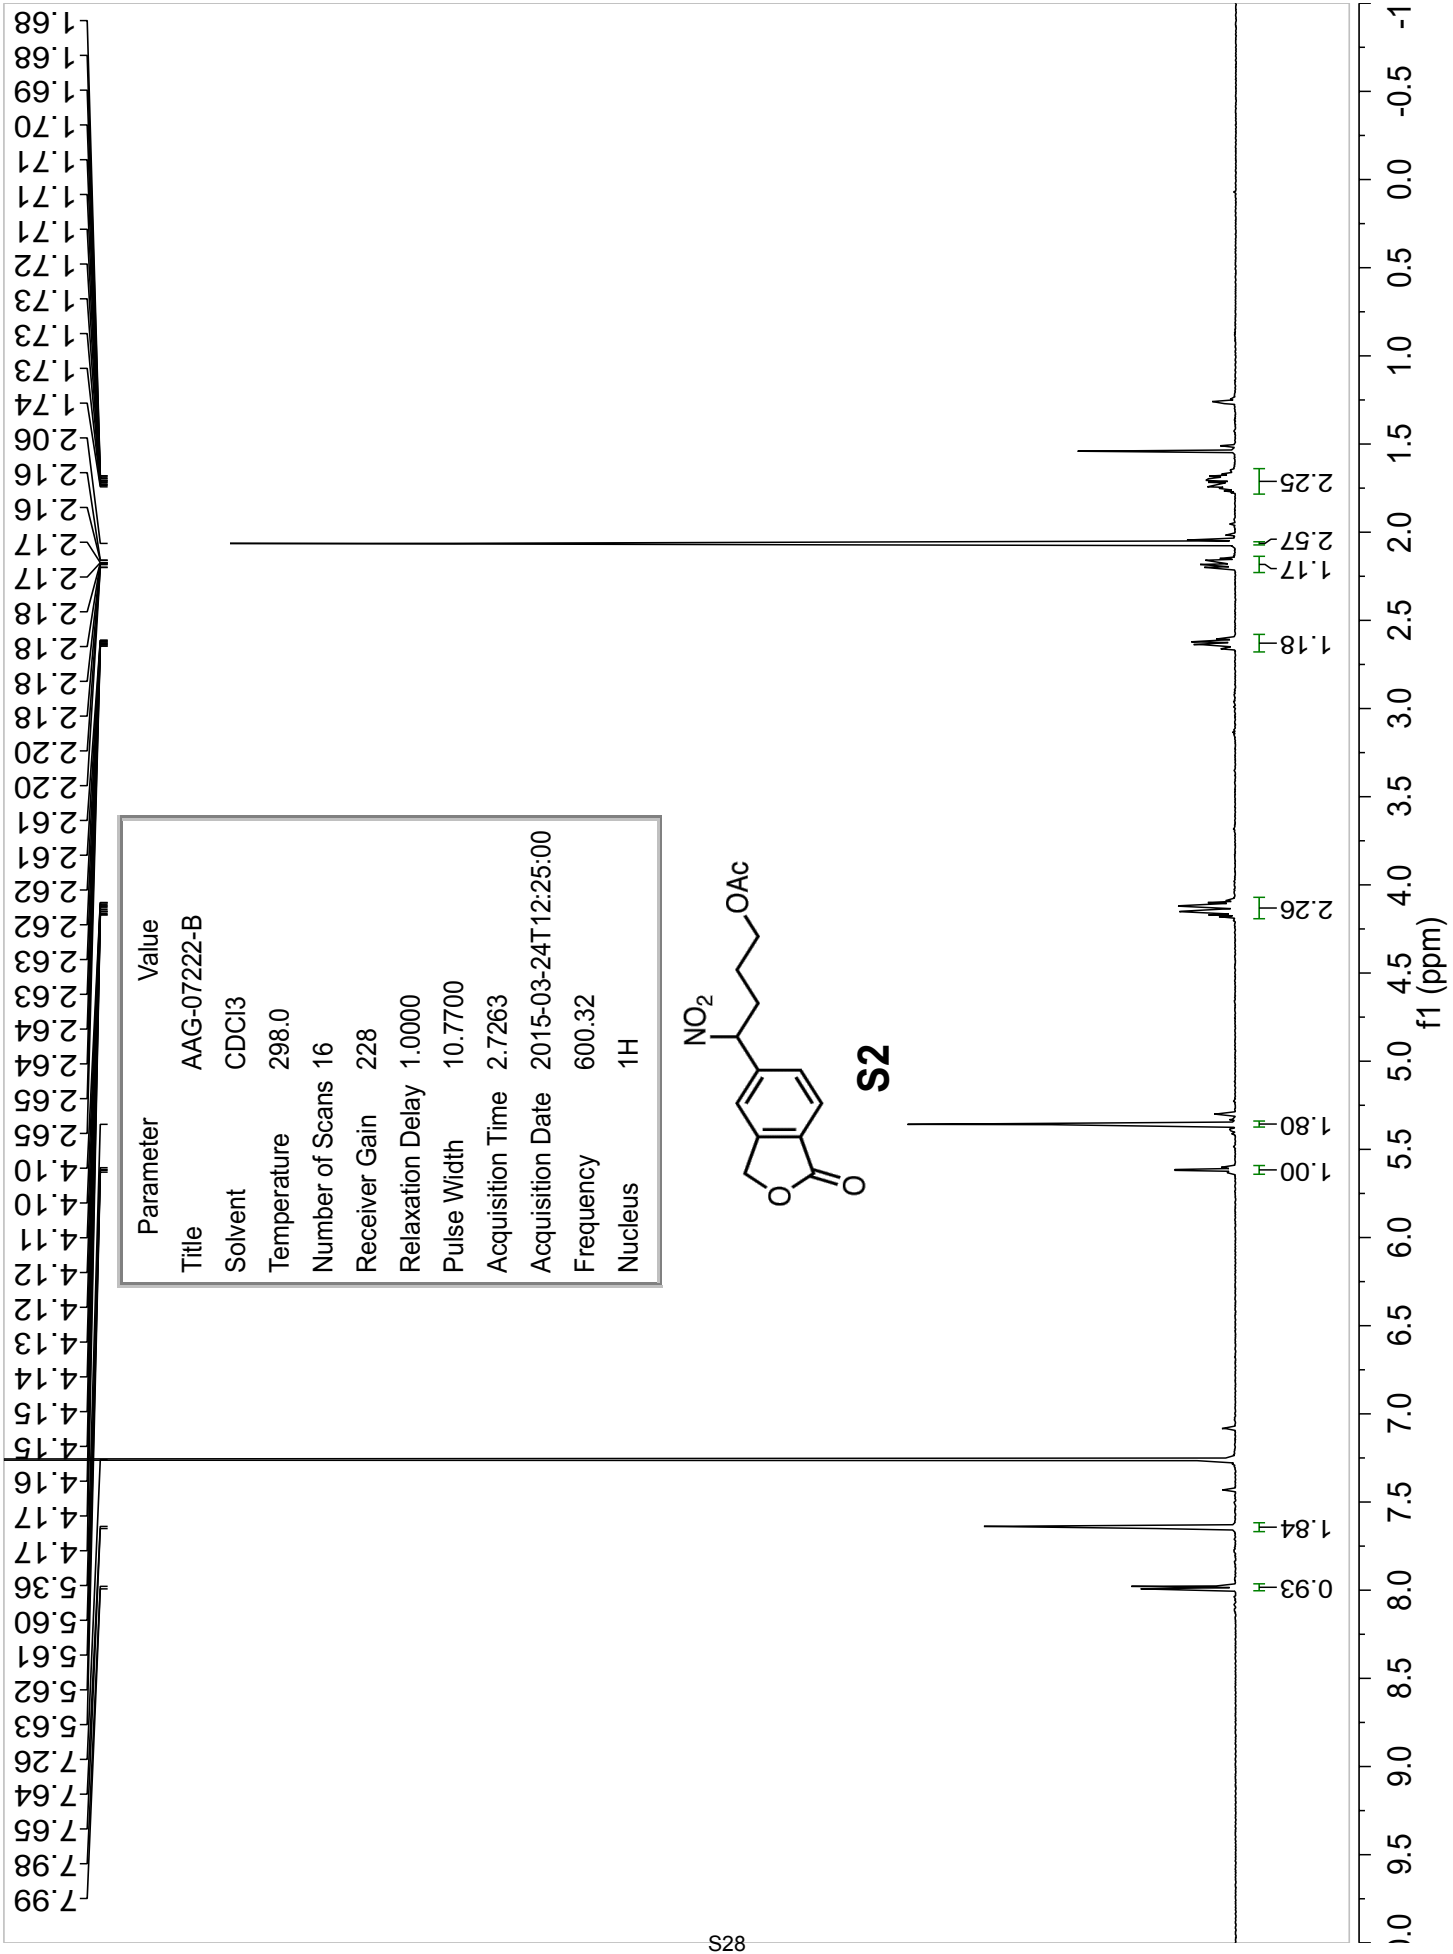

| Parameter        | Value               |
|------------------|---------------------|
| Title            | AAG-07222-B         |
| Solvent          | CDCl3               |
| Temperature      | 298.0               |
| Number of Scans  | 16                  |
| Receiver Gain    | 228                 |
| Relaxation Delay | 1.0000              |
| Pulse Width      | 10.7700             |
| Acquisition Time | 2.7263              |
| Acquisition Date | 2015-03-24T12:25:00 |
| Frequency        | 600.32              |
| Nucleus          | 1H                  |

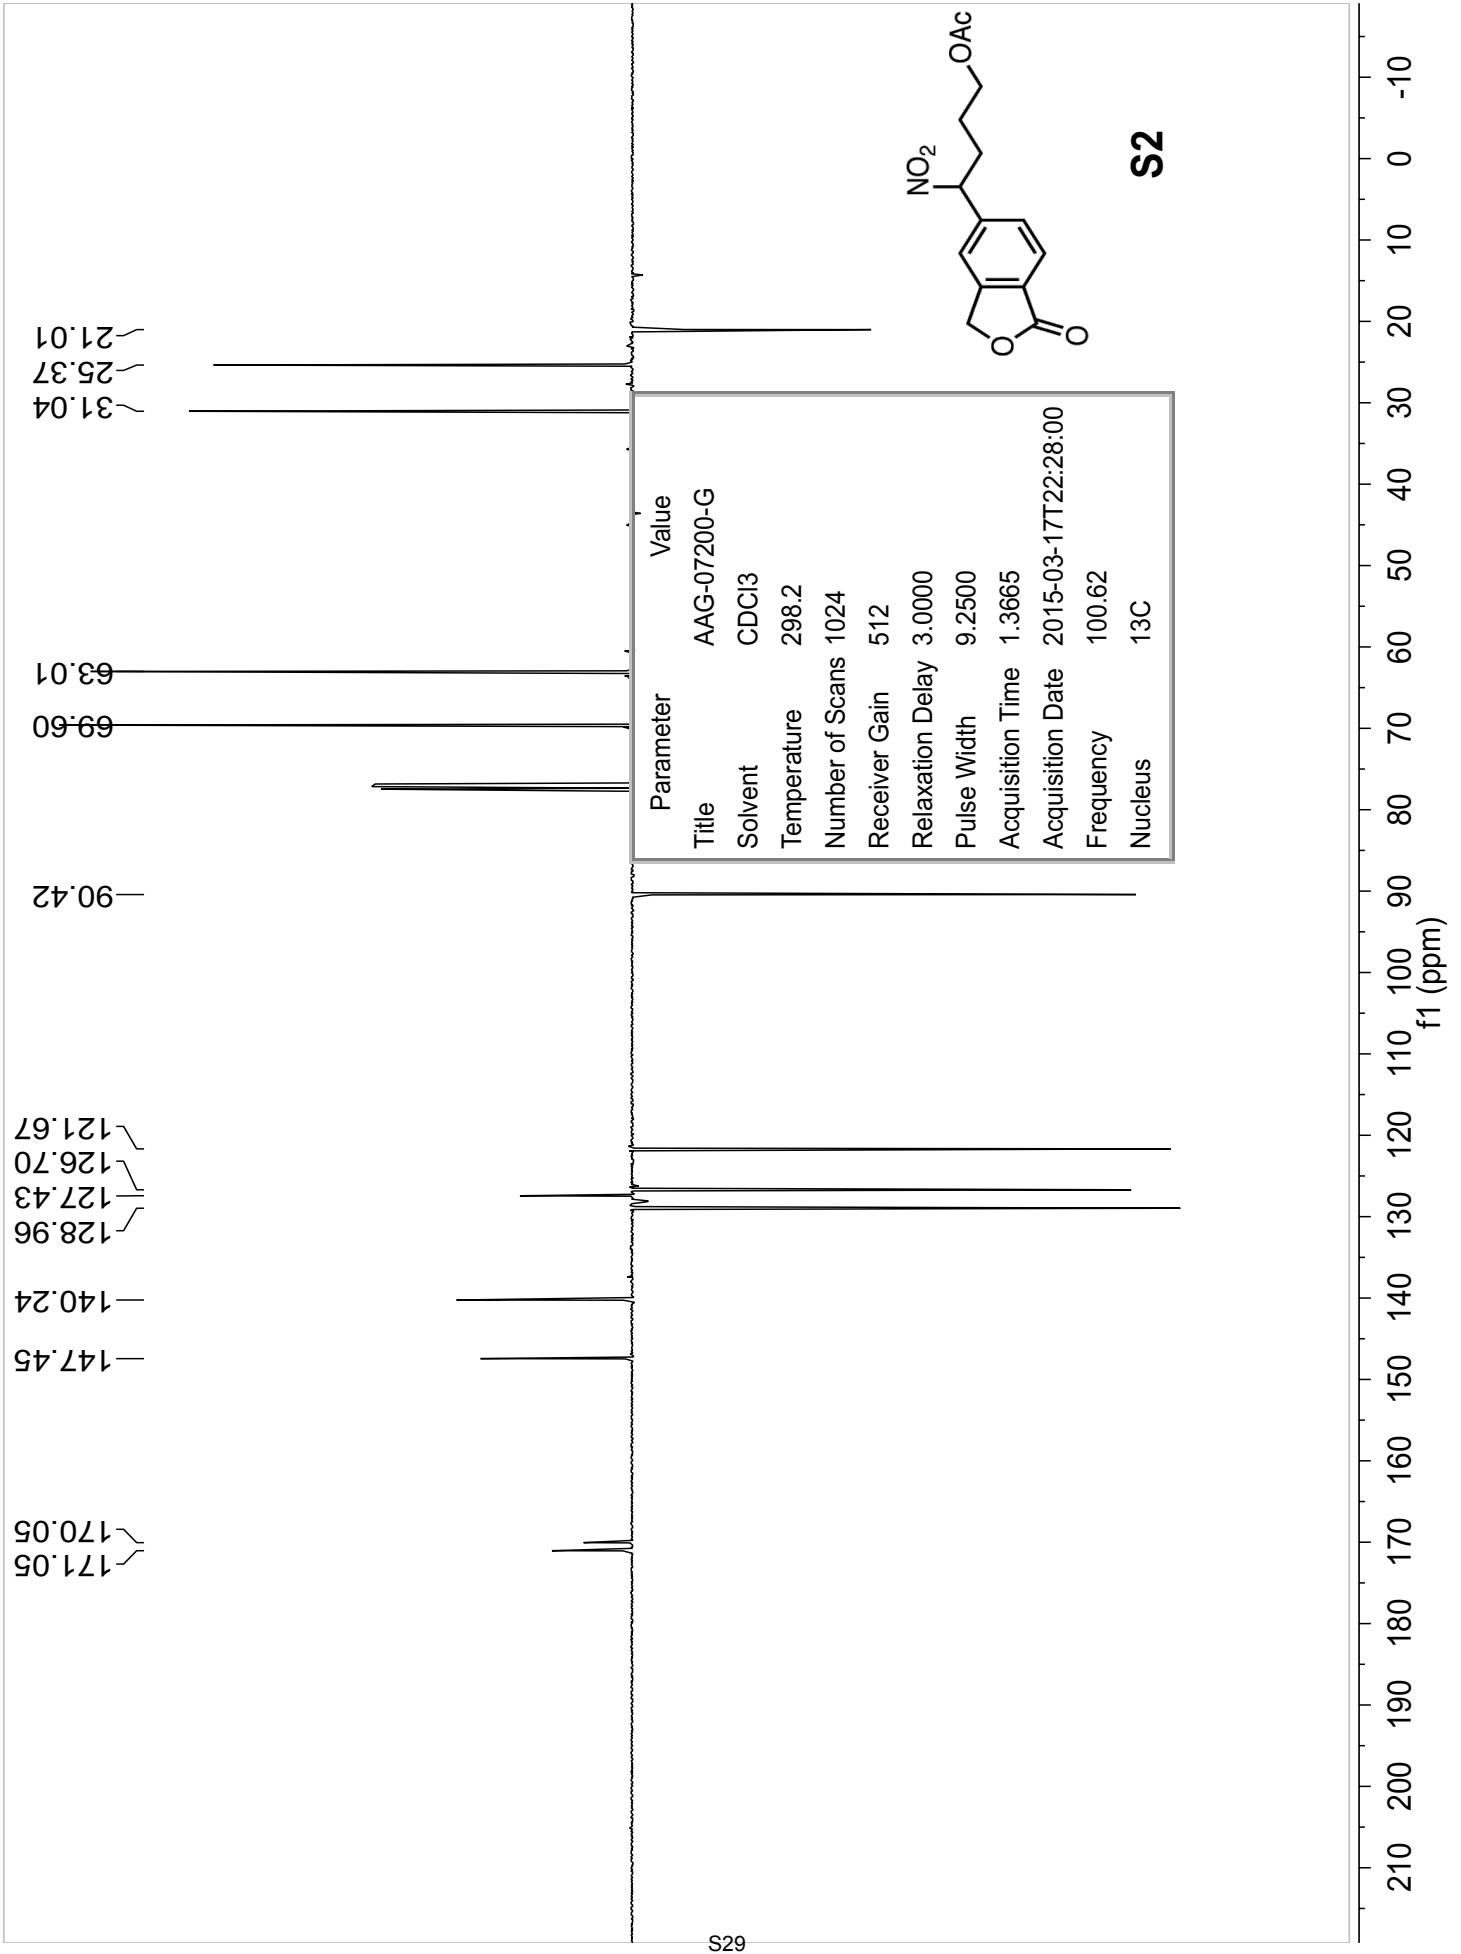

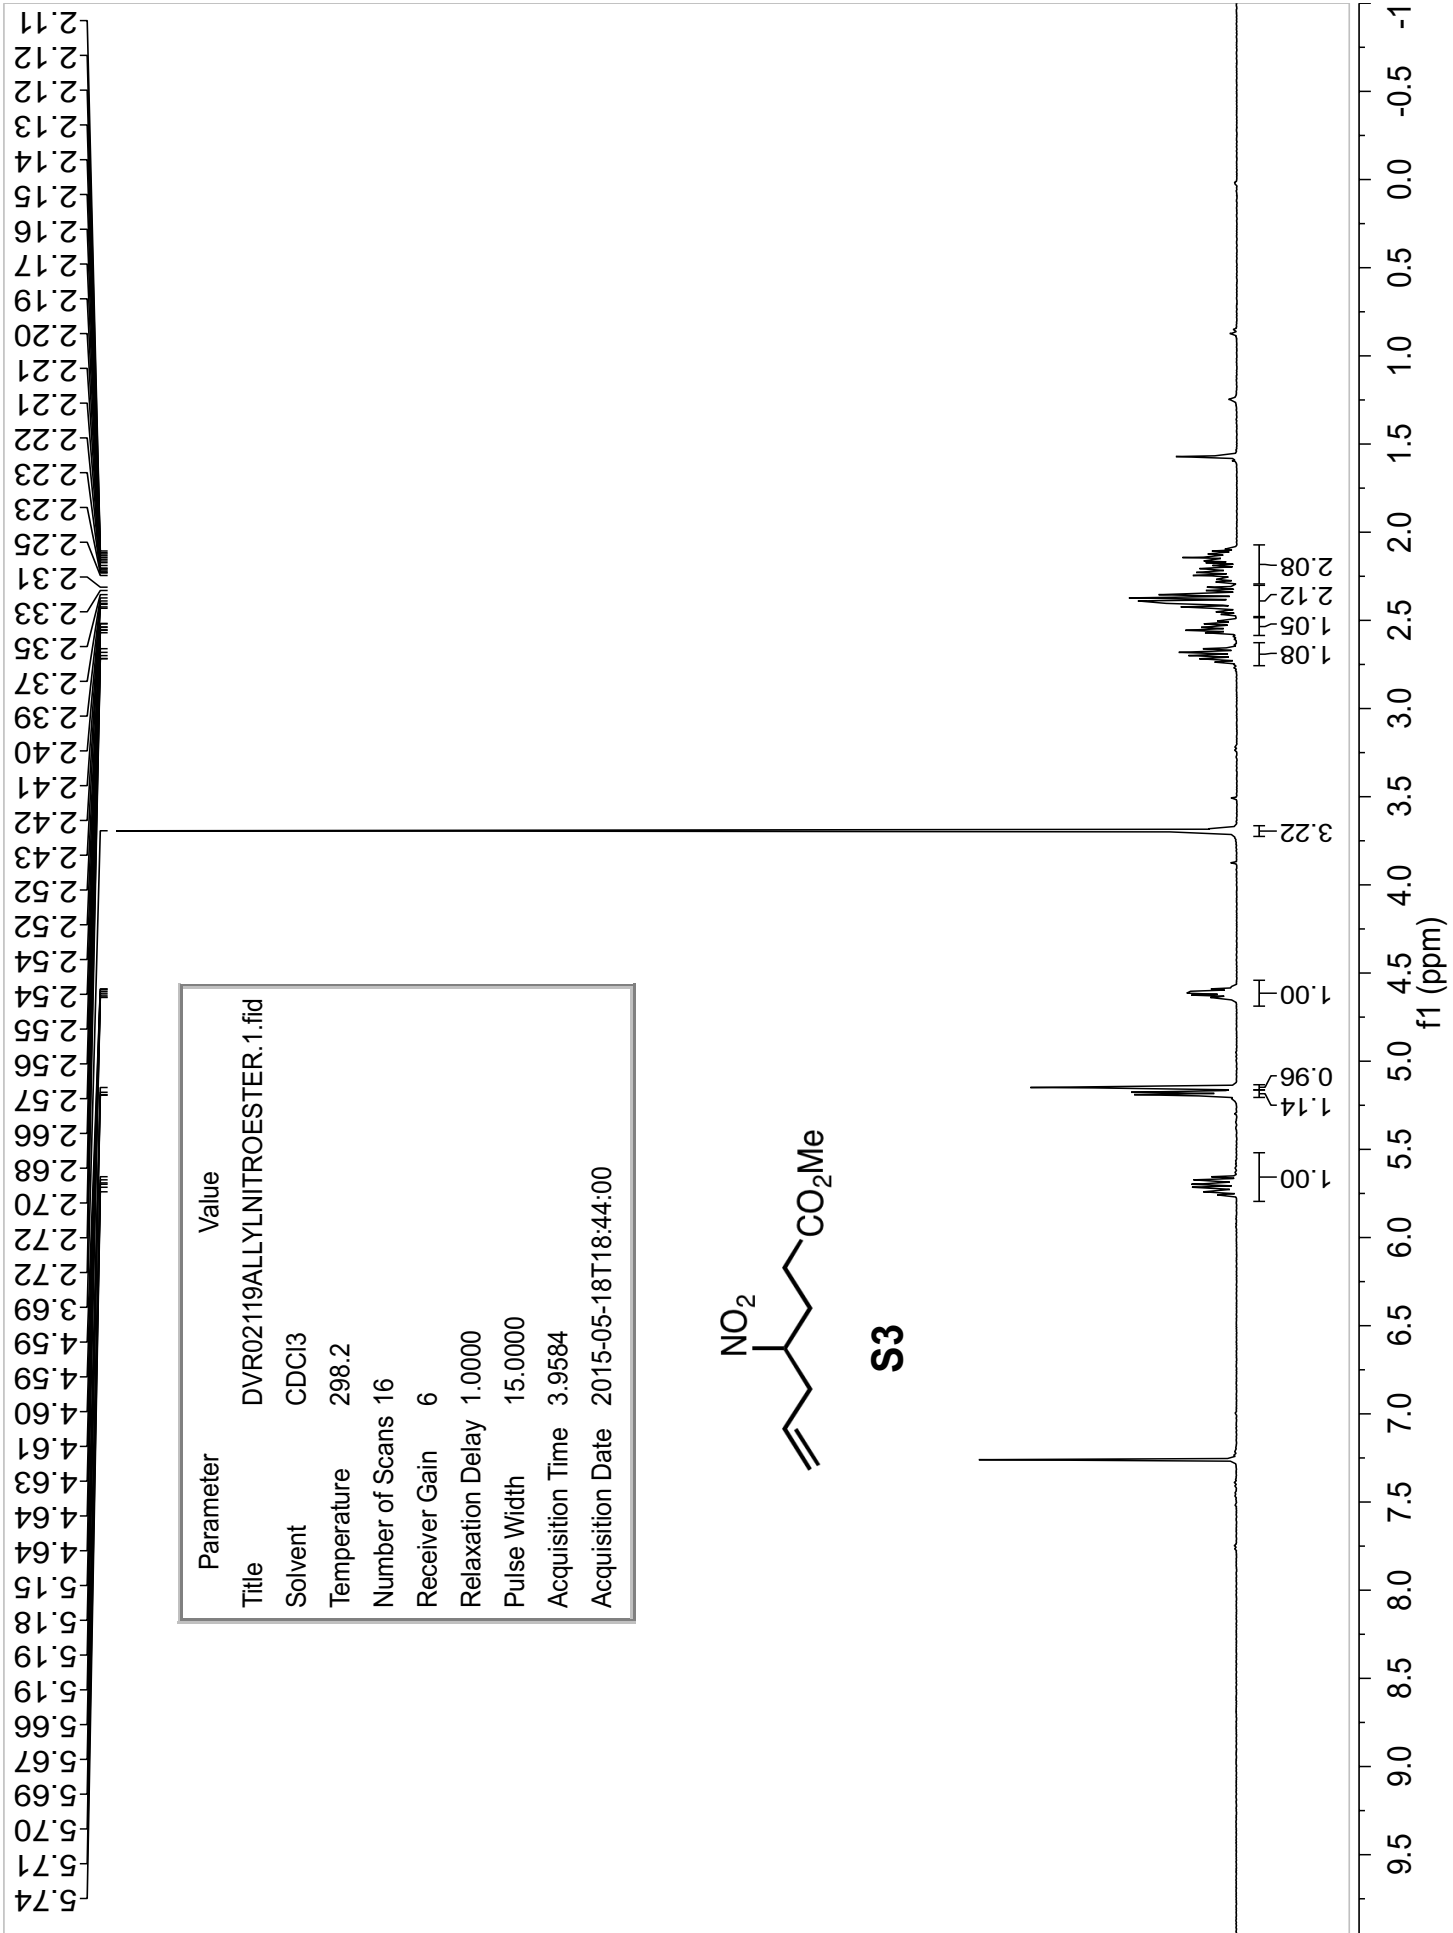

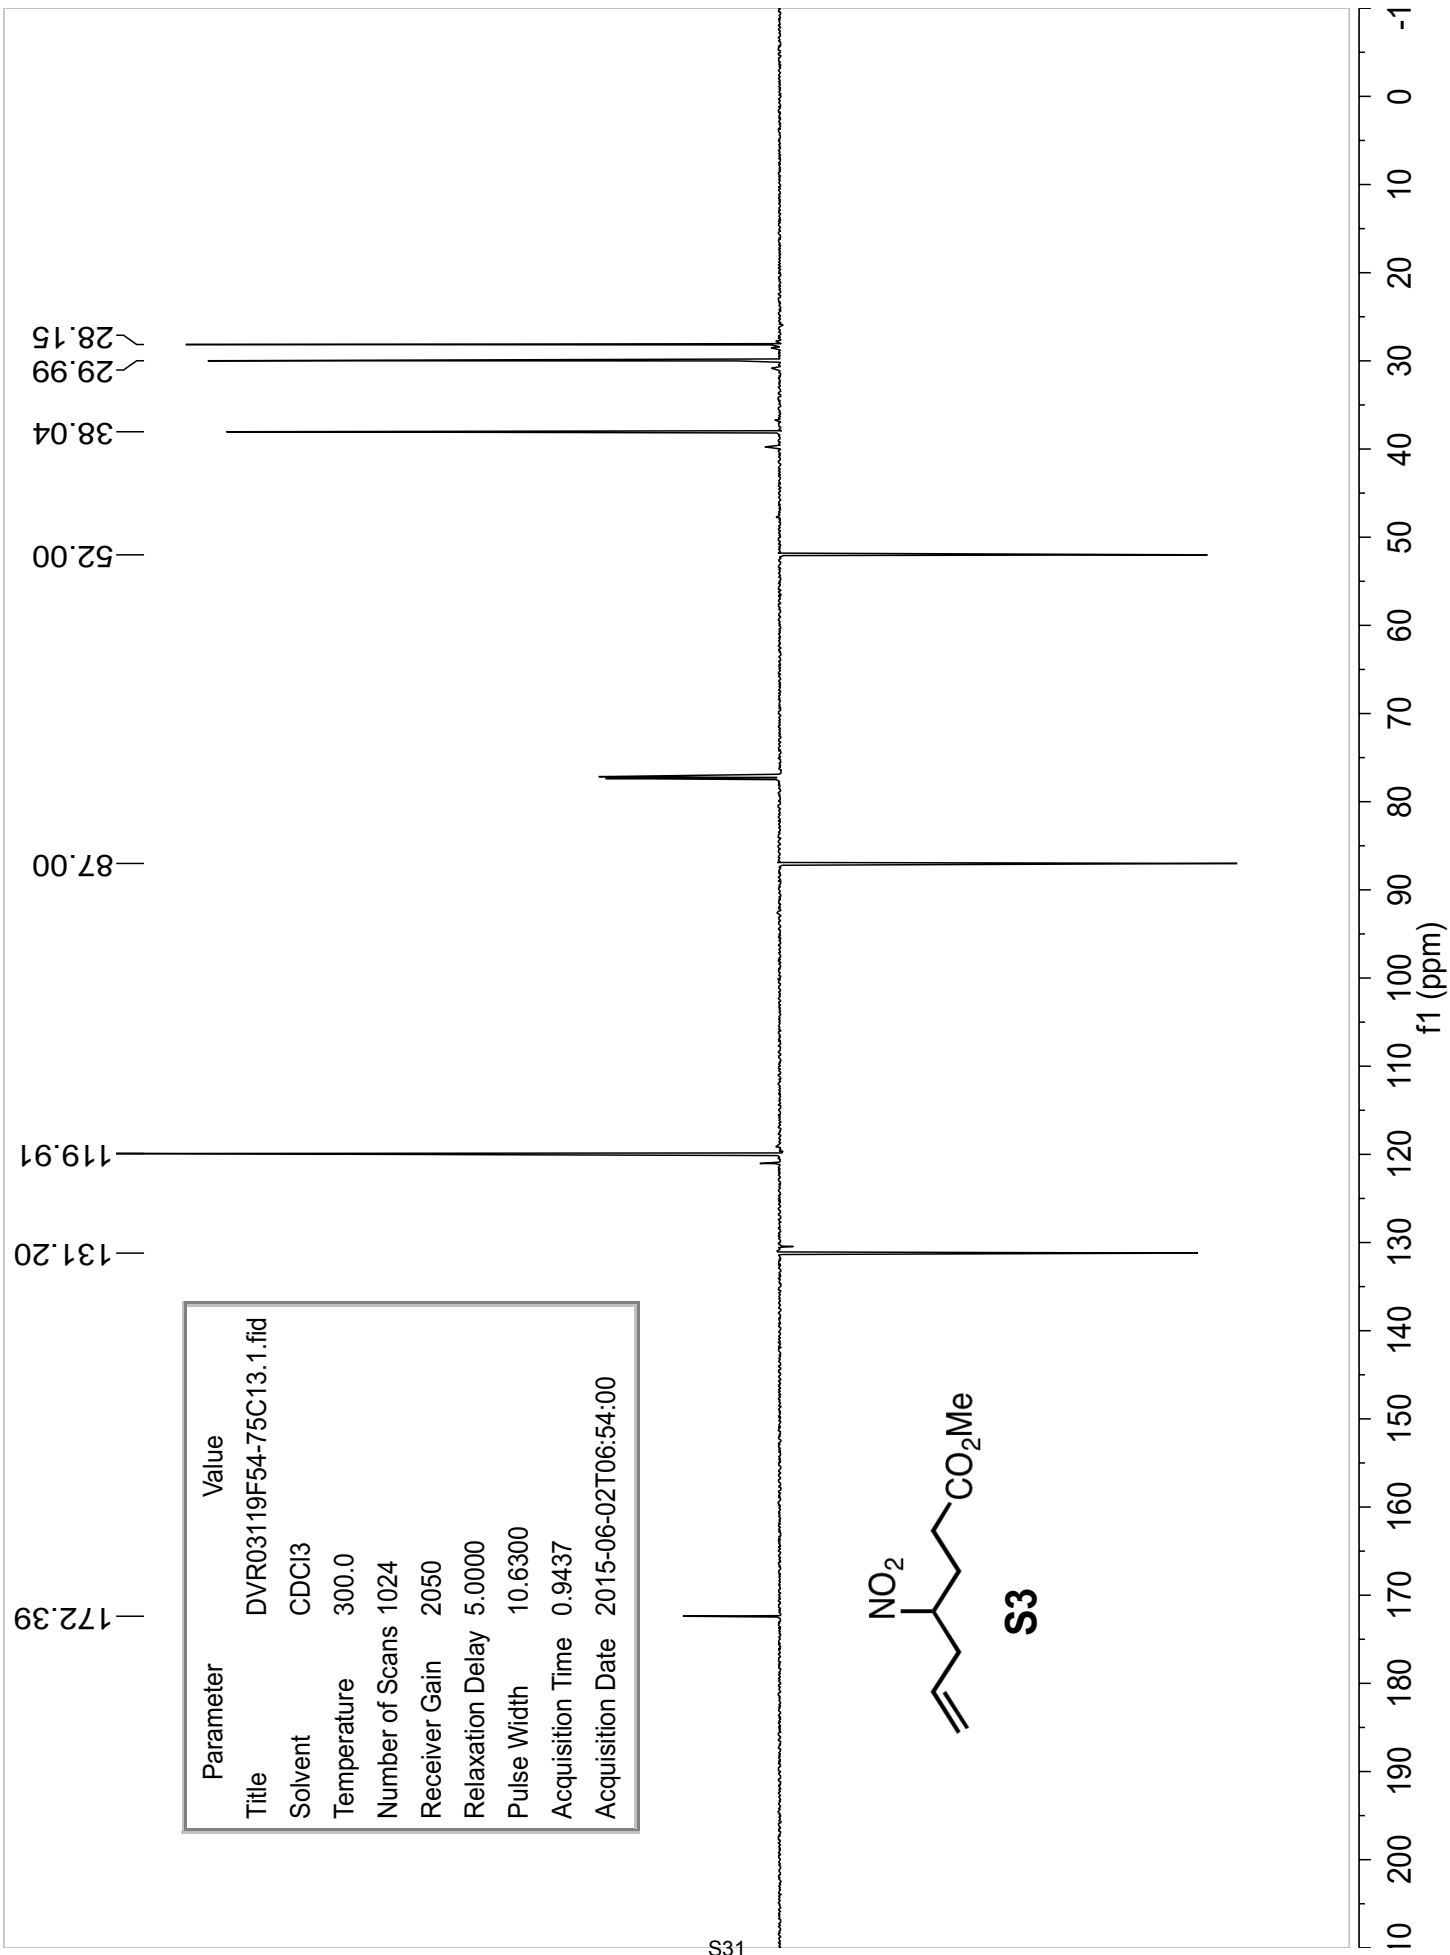





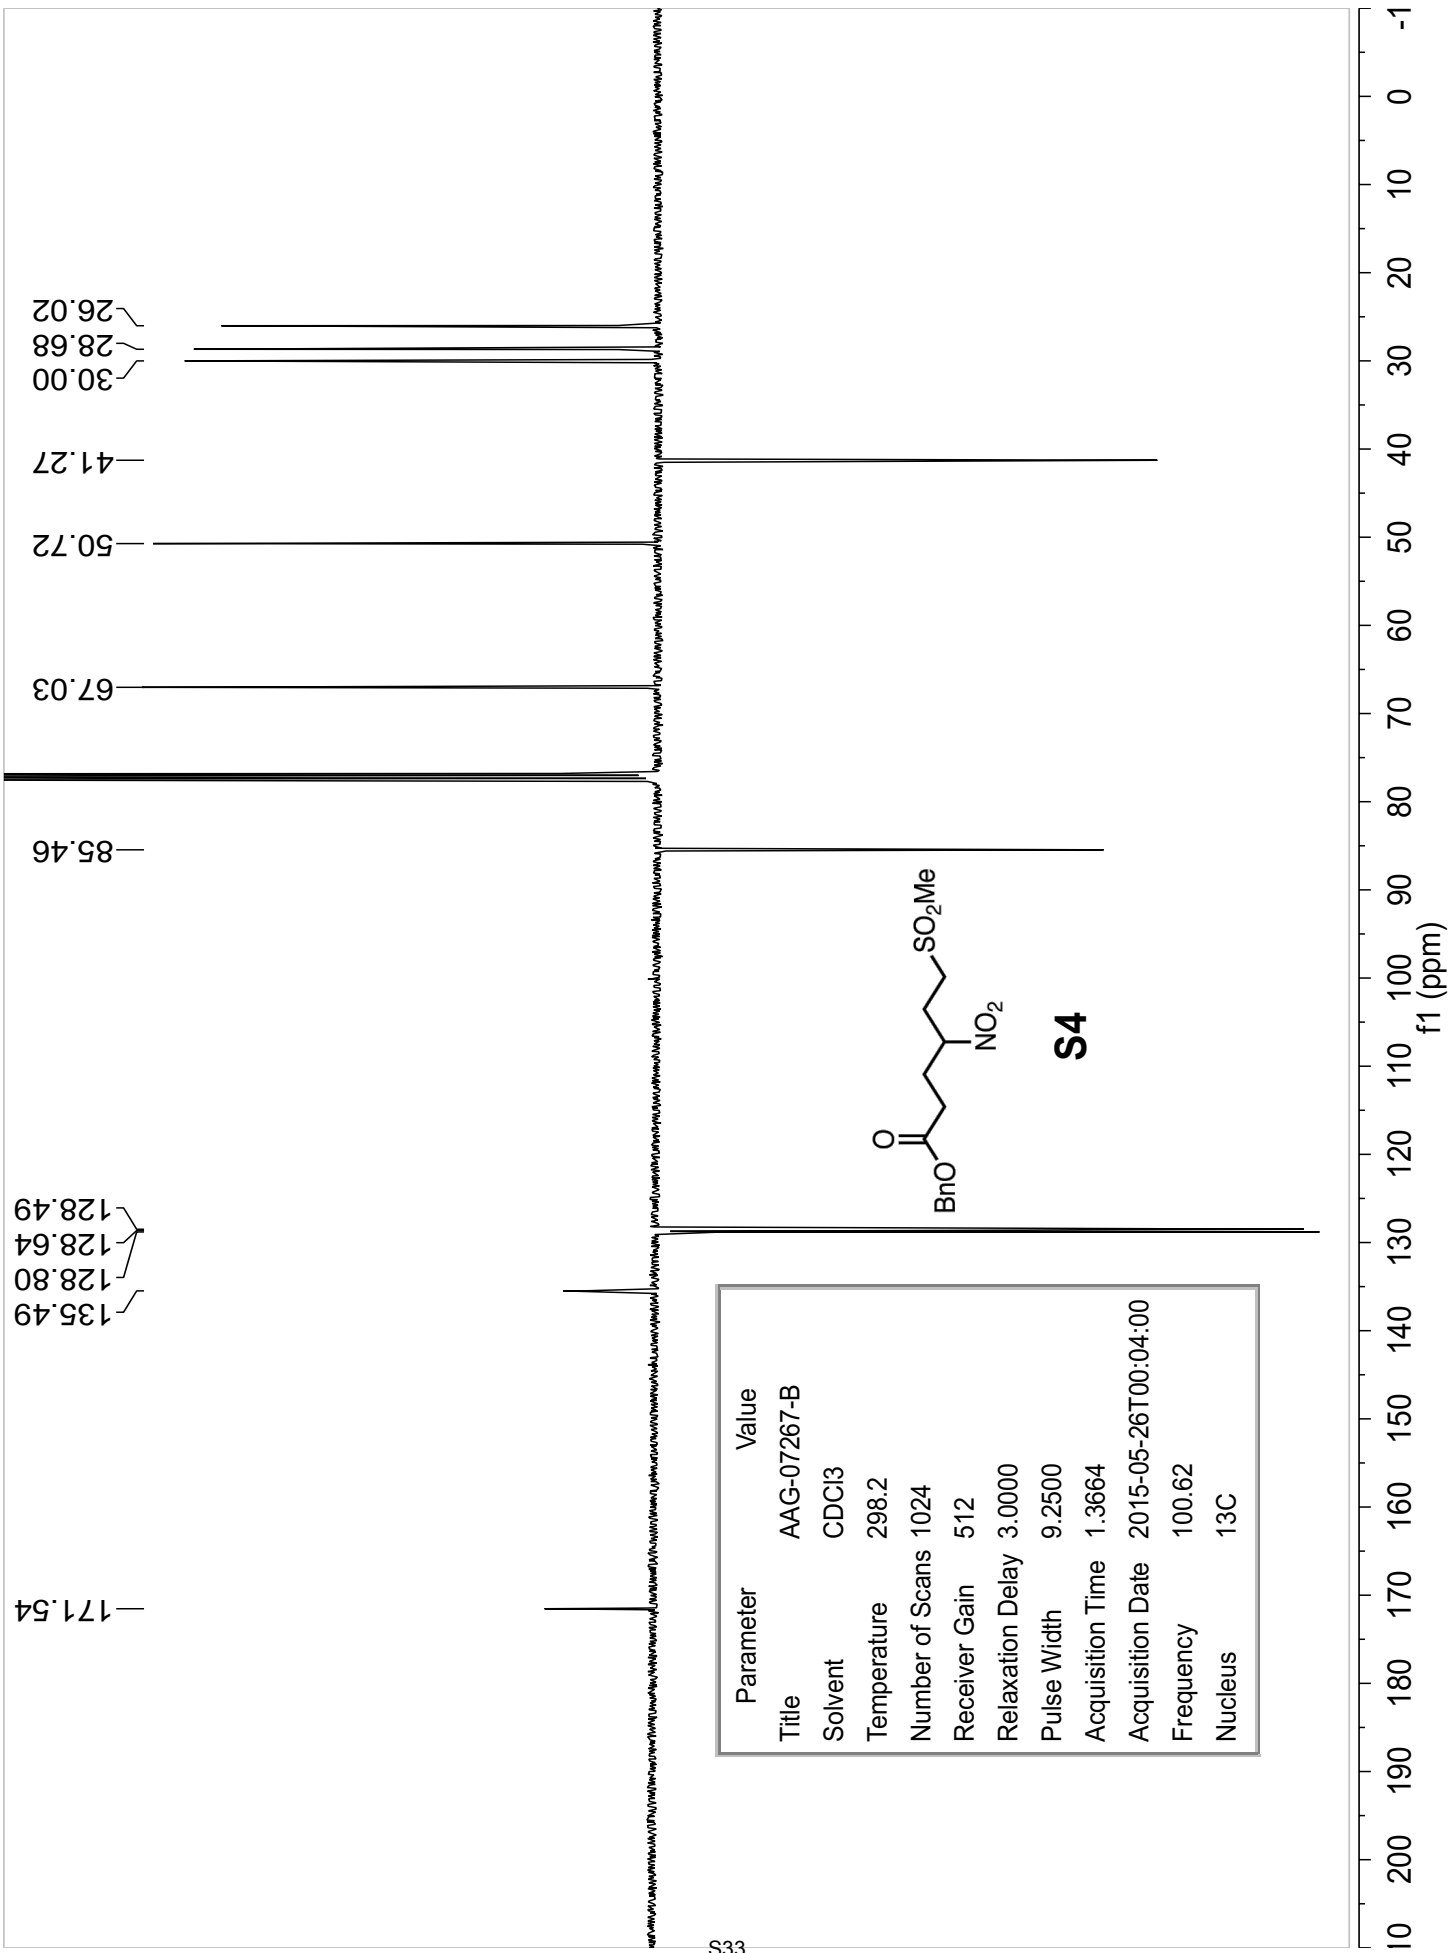

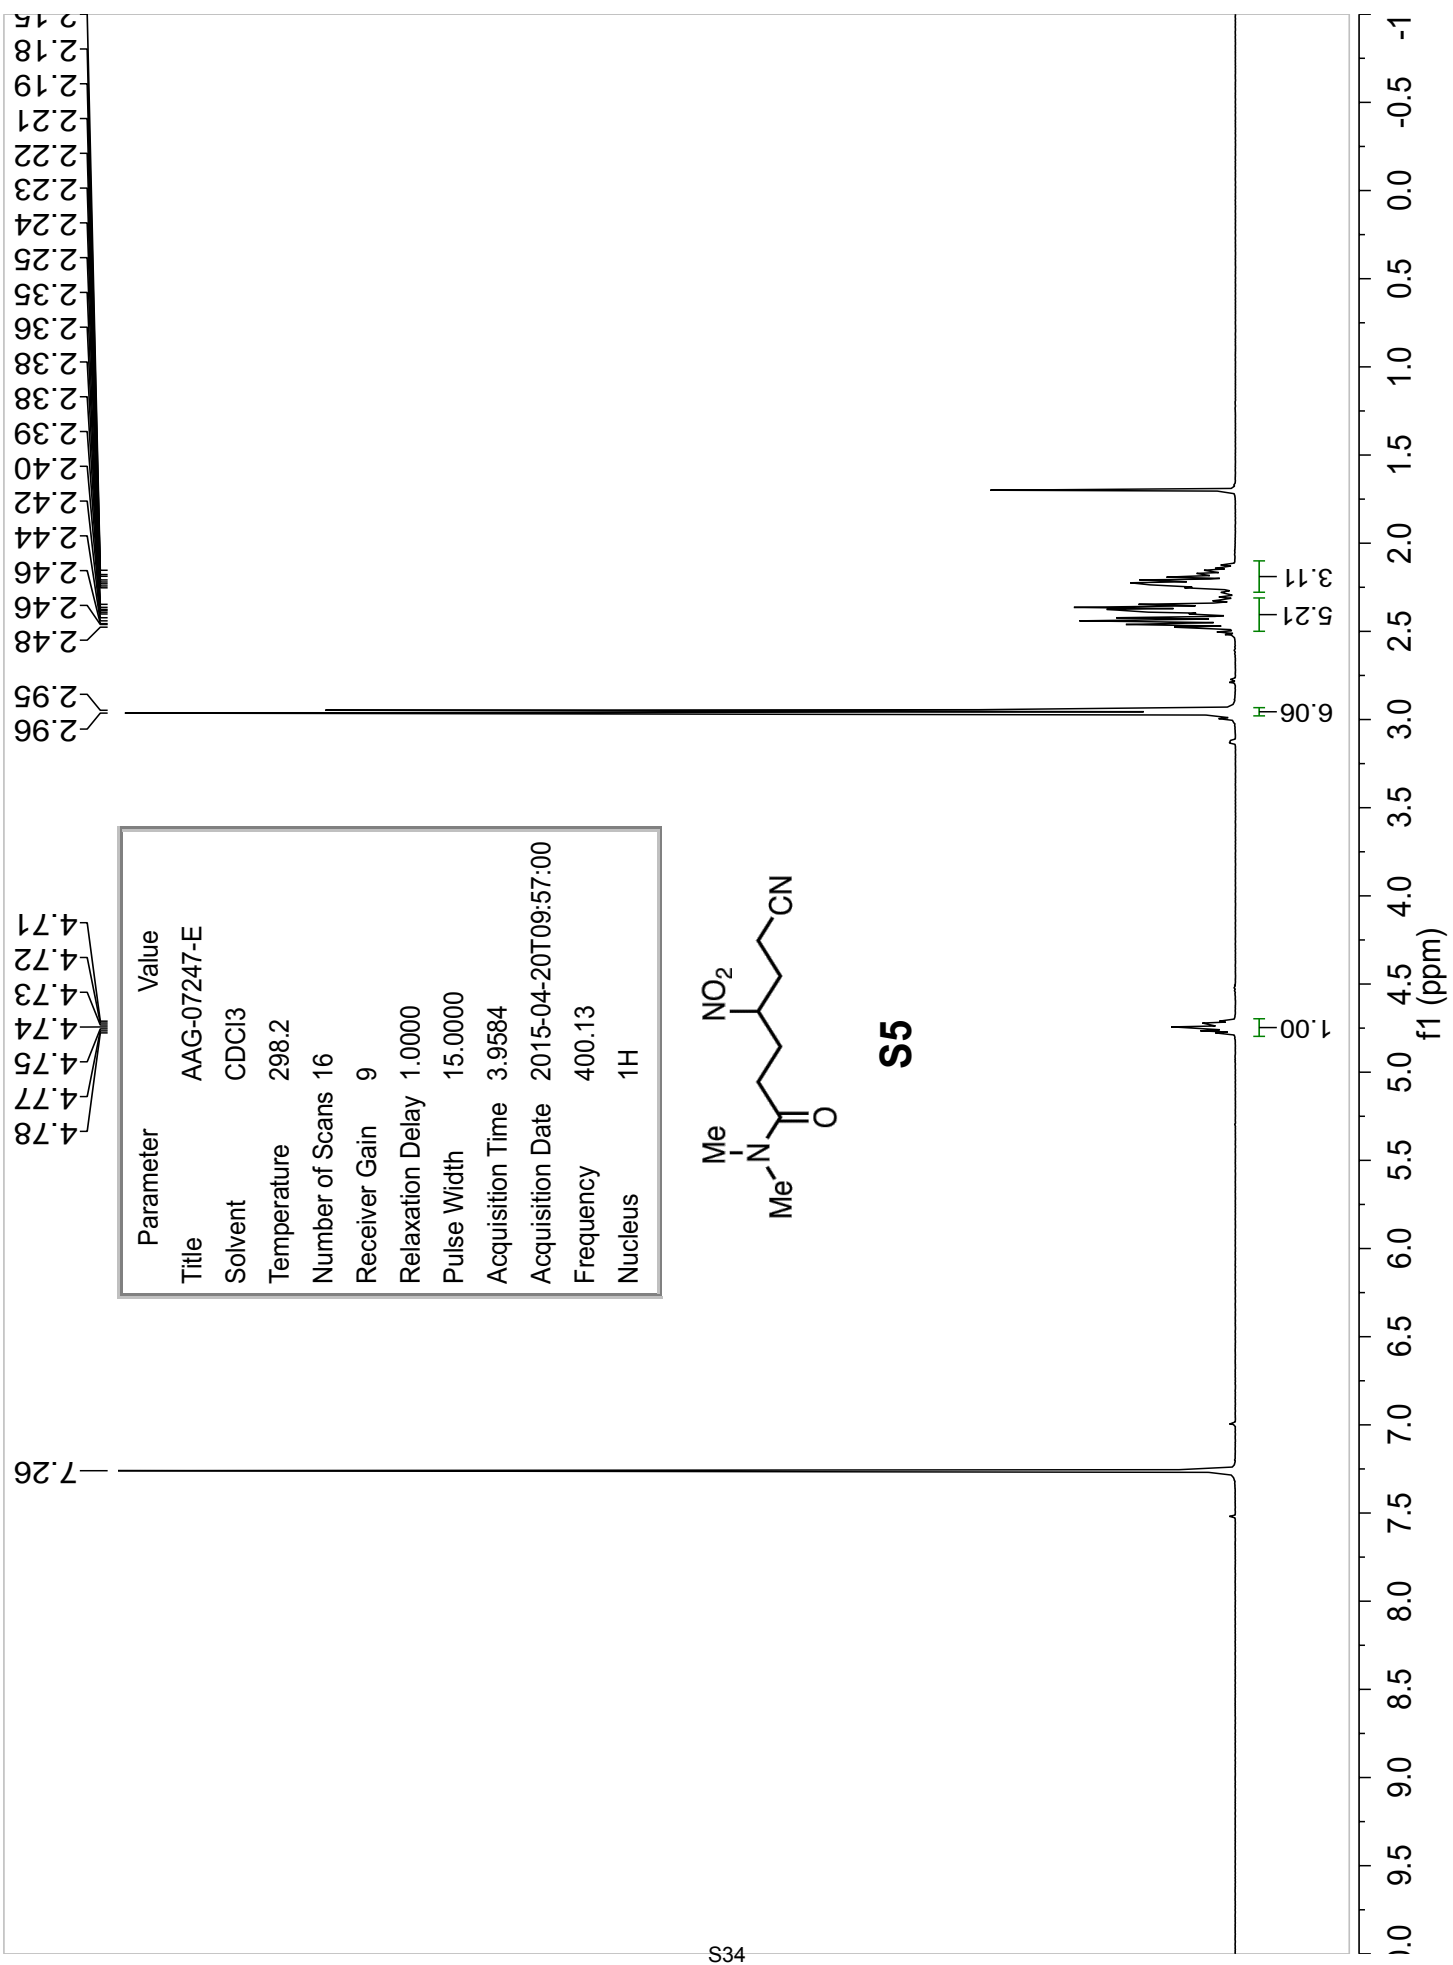

| Parameter        | Value               |
|------------------|---------------------|
| Title            | AAG-07247-E         |
| Solvent          | CDCl3               |
| Temperature      | 298.2               |
| Number of Scans  | 16                  |
| Receiver Gain    | 9                   |
| Relaxation Delay | 1.0000              |
| Pulse Width      | 15.0000             |
| Acquisition Time | 3.9584              |
| Acquisition Date | 2015-04-20T09:57:00 |
| Frequency        | 400.13              |
| Nucleus          | 1H                  |

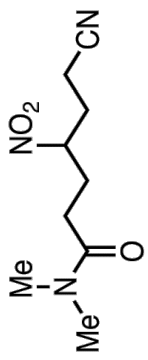

S5

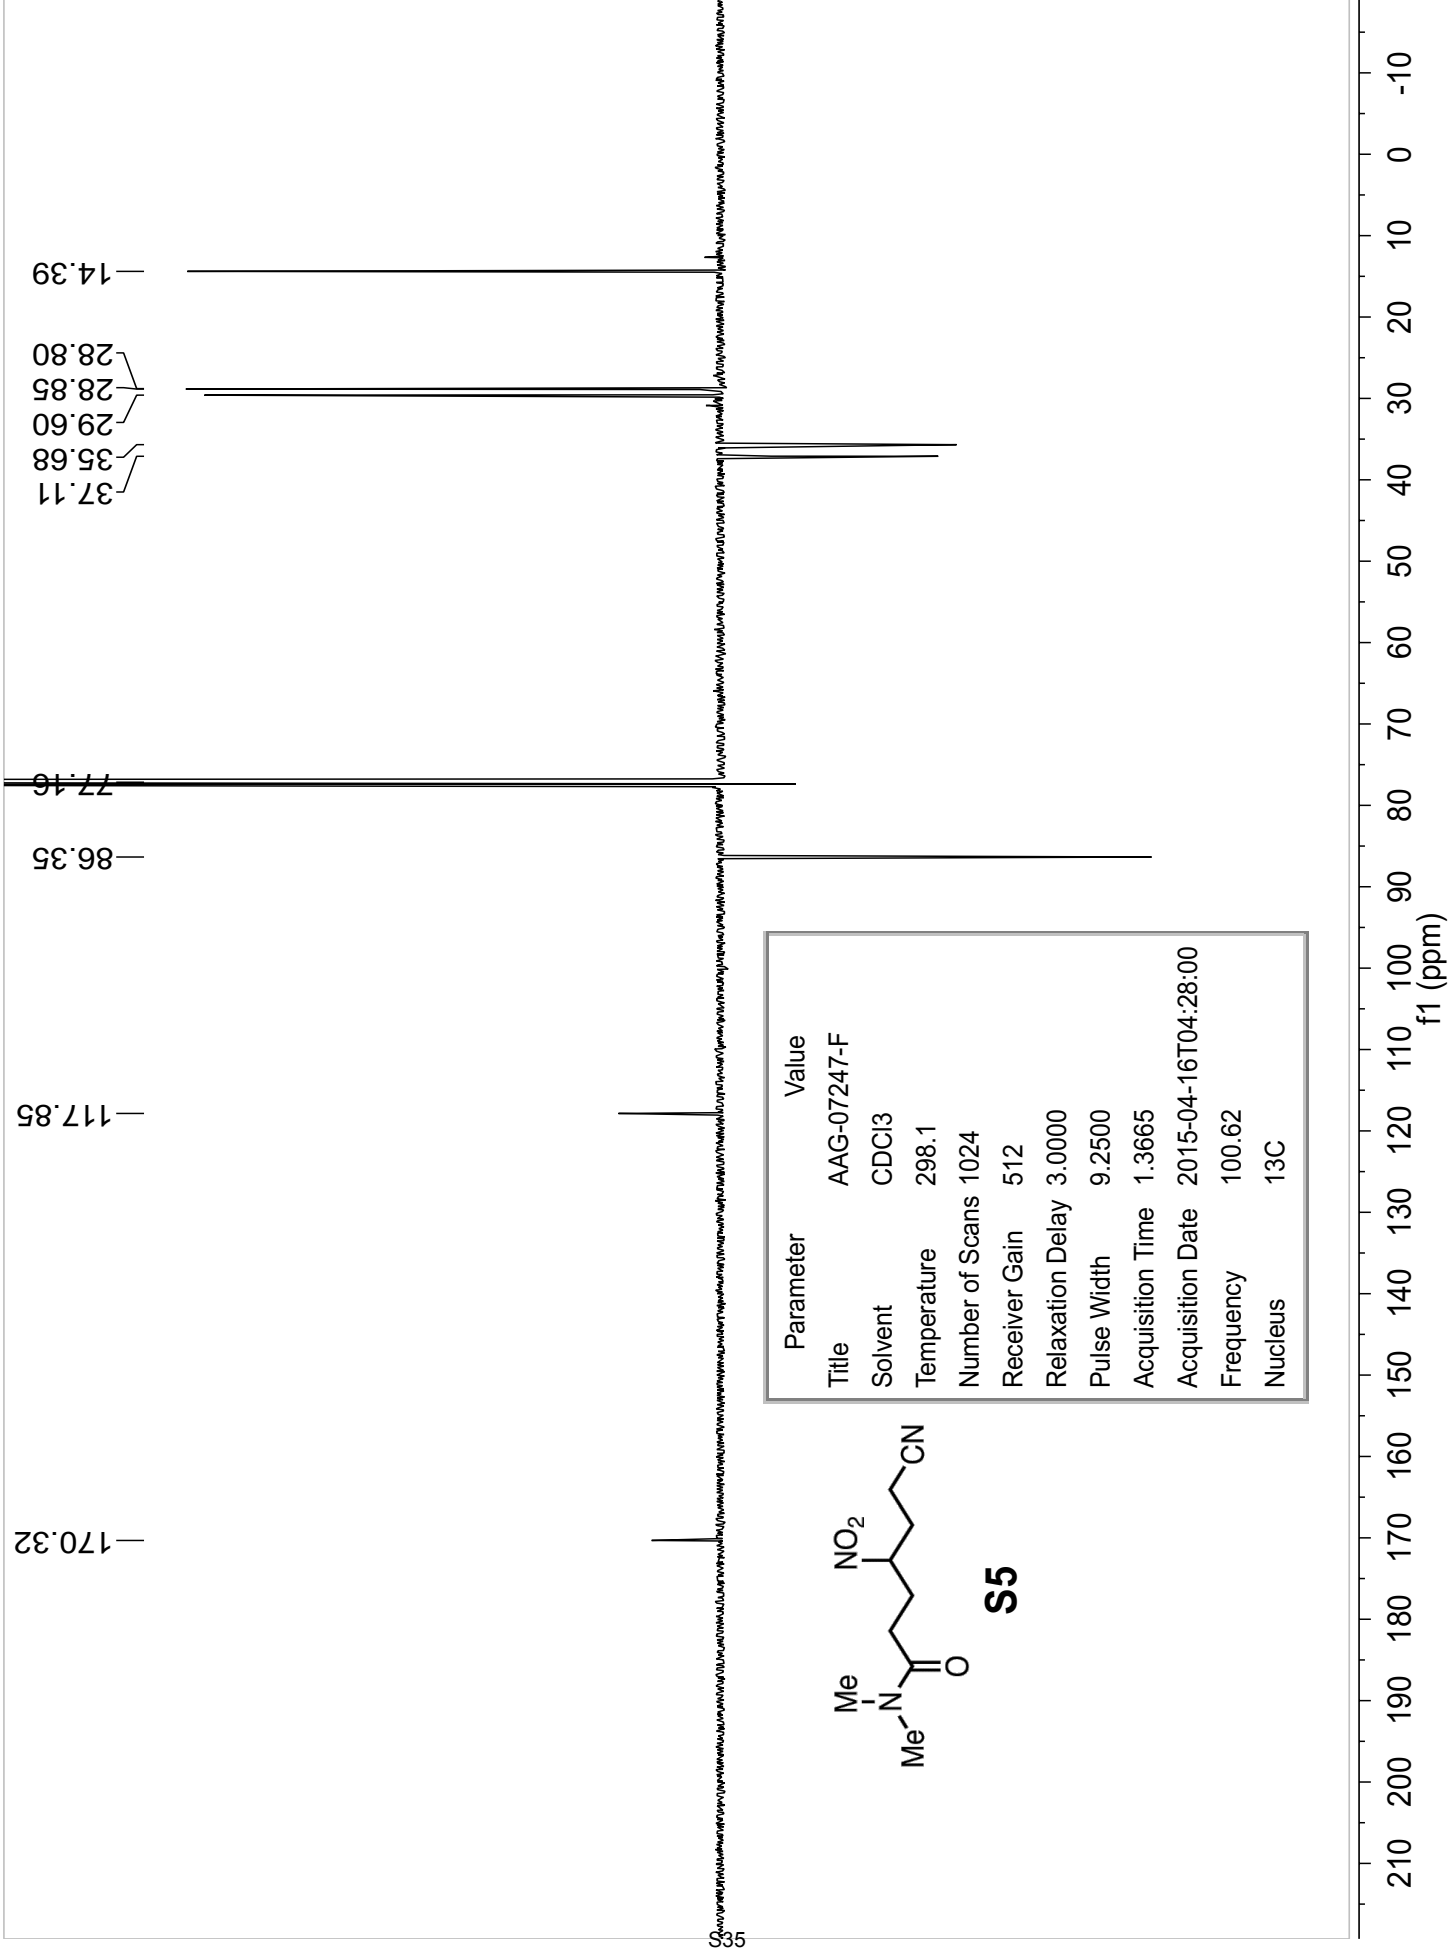





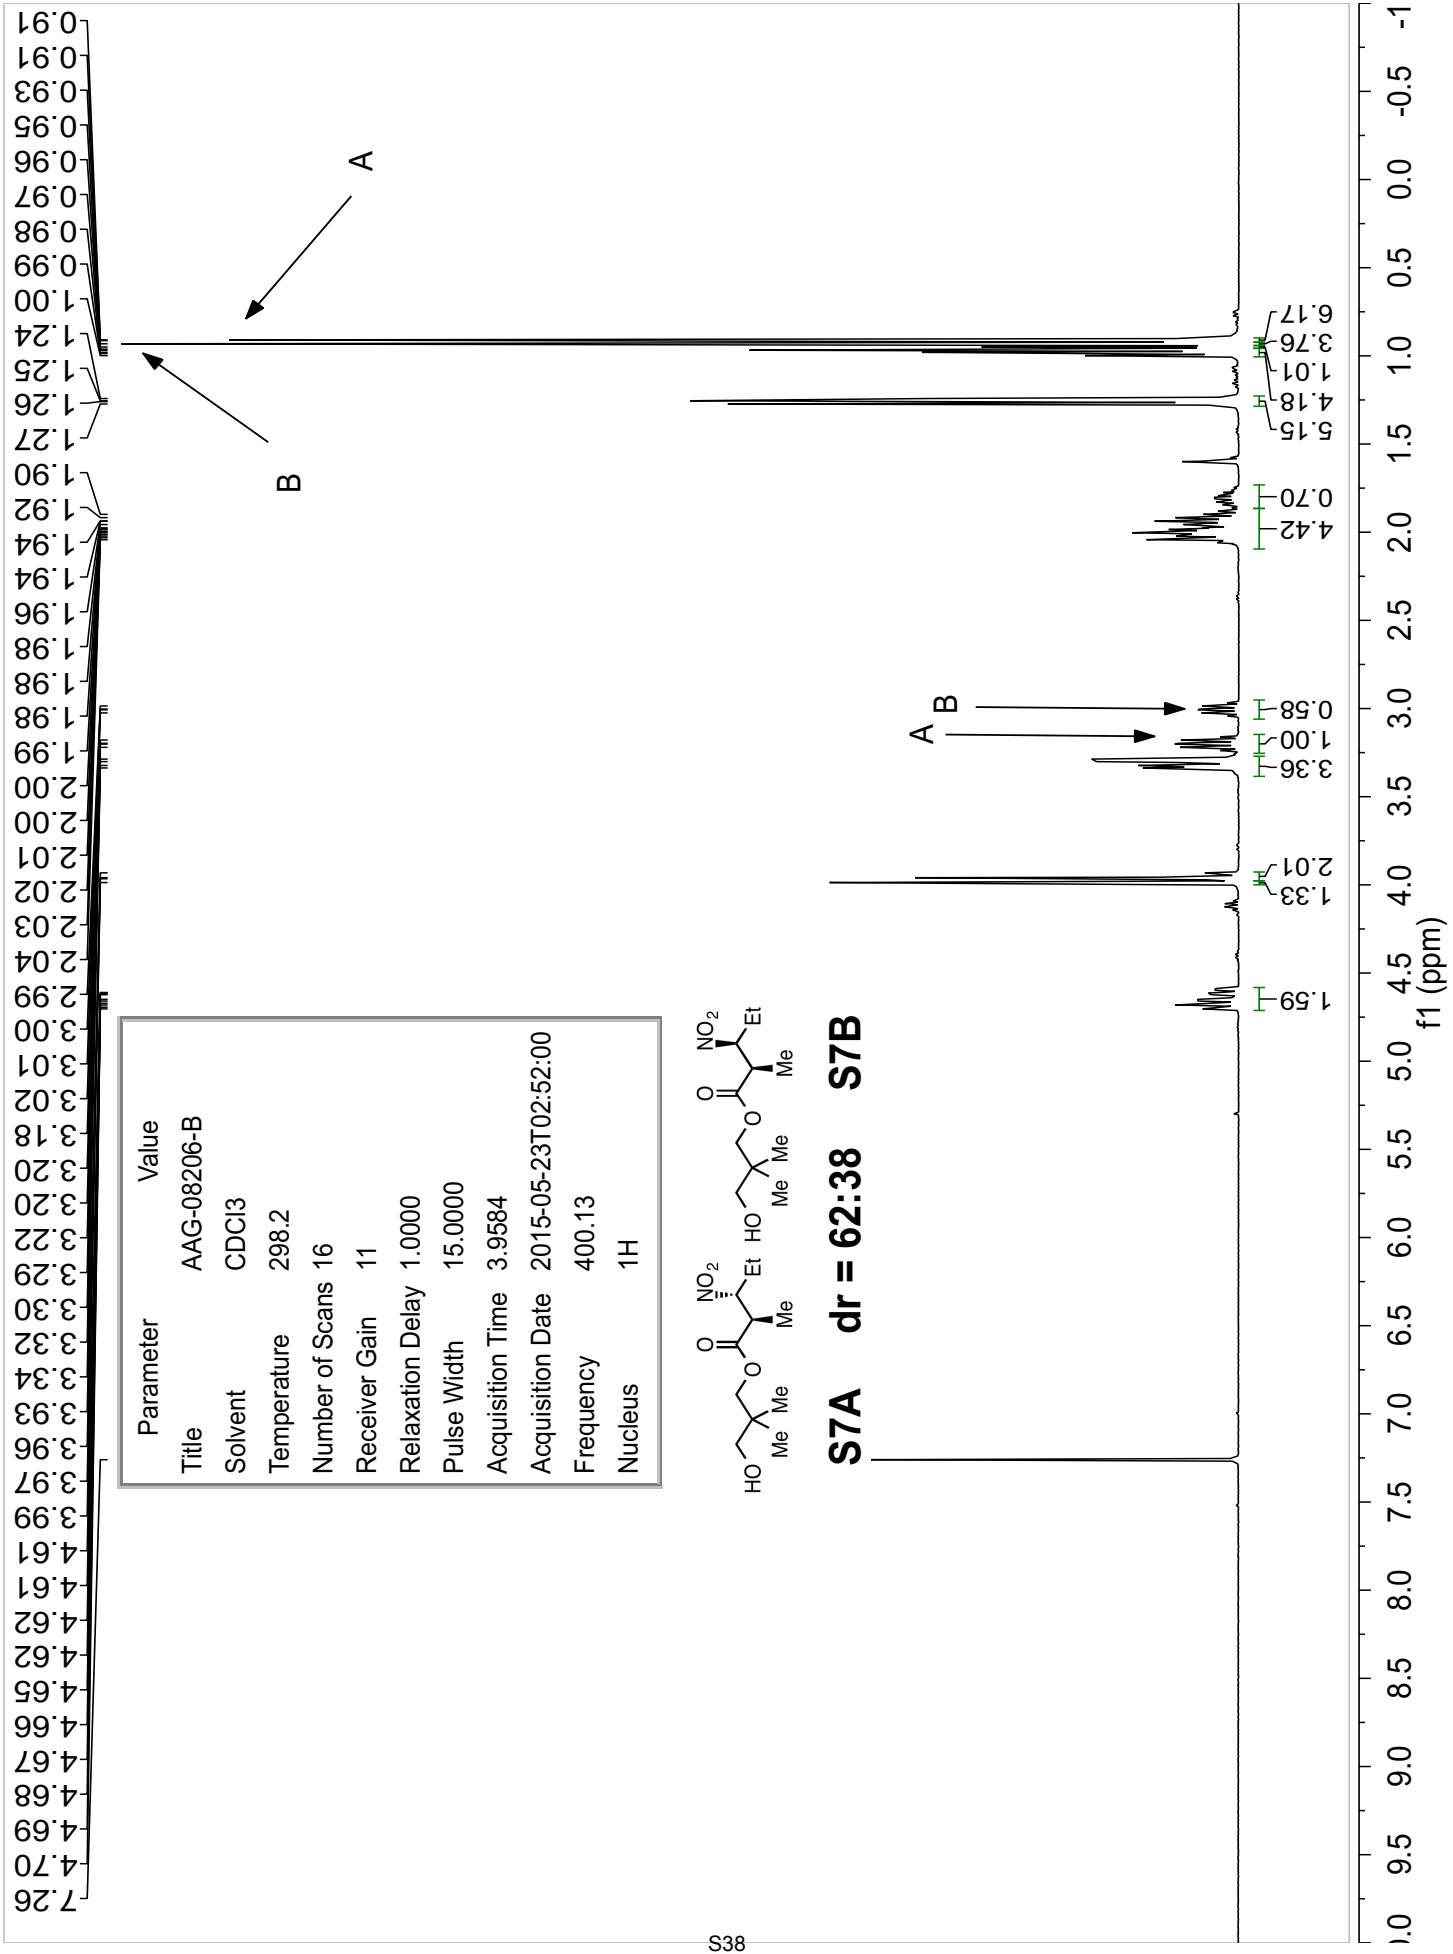

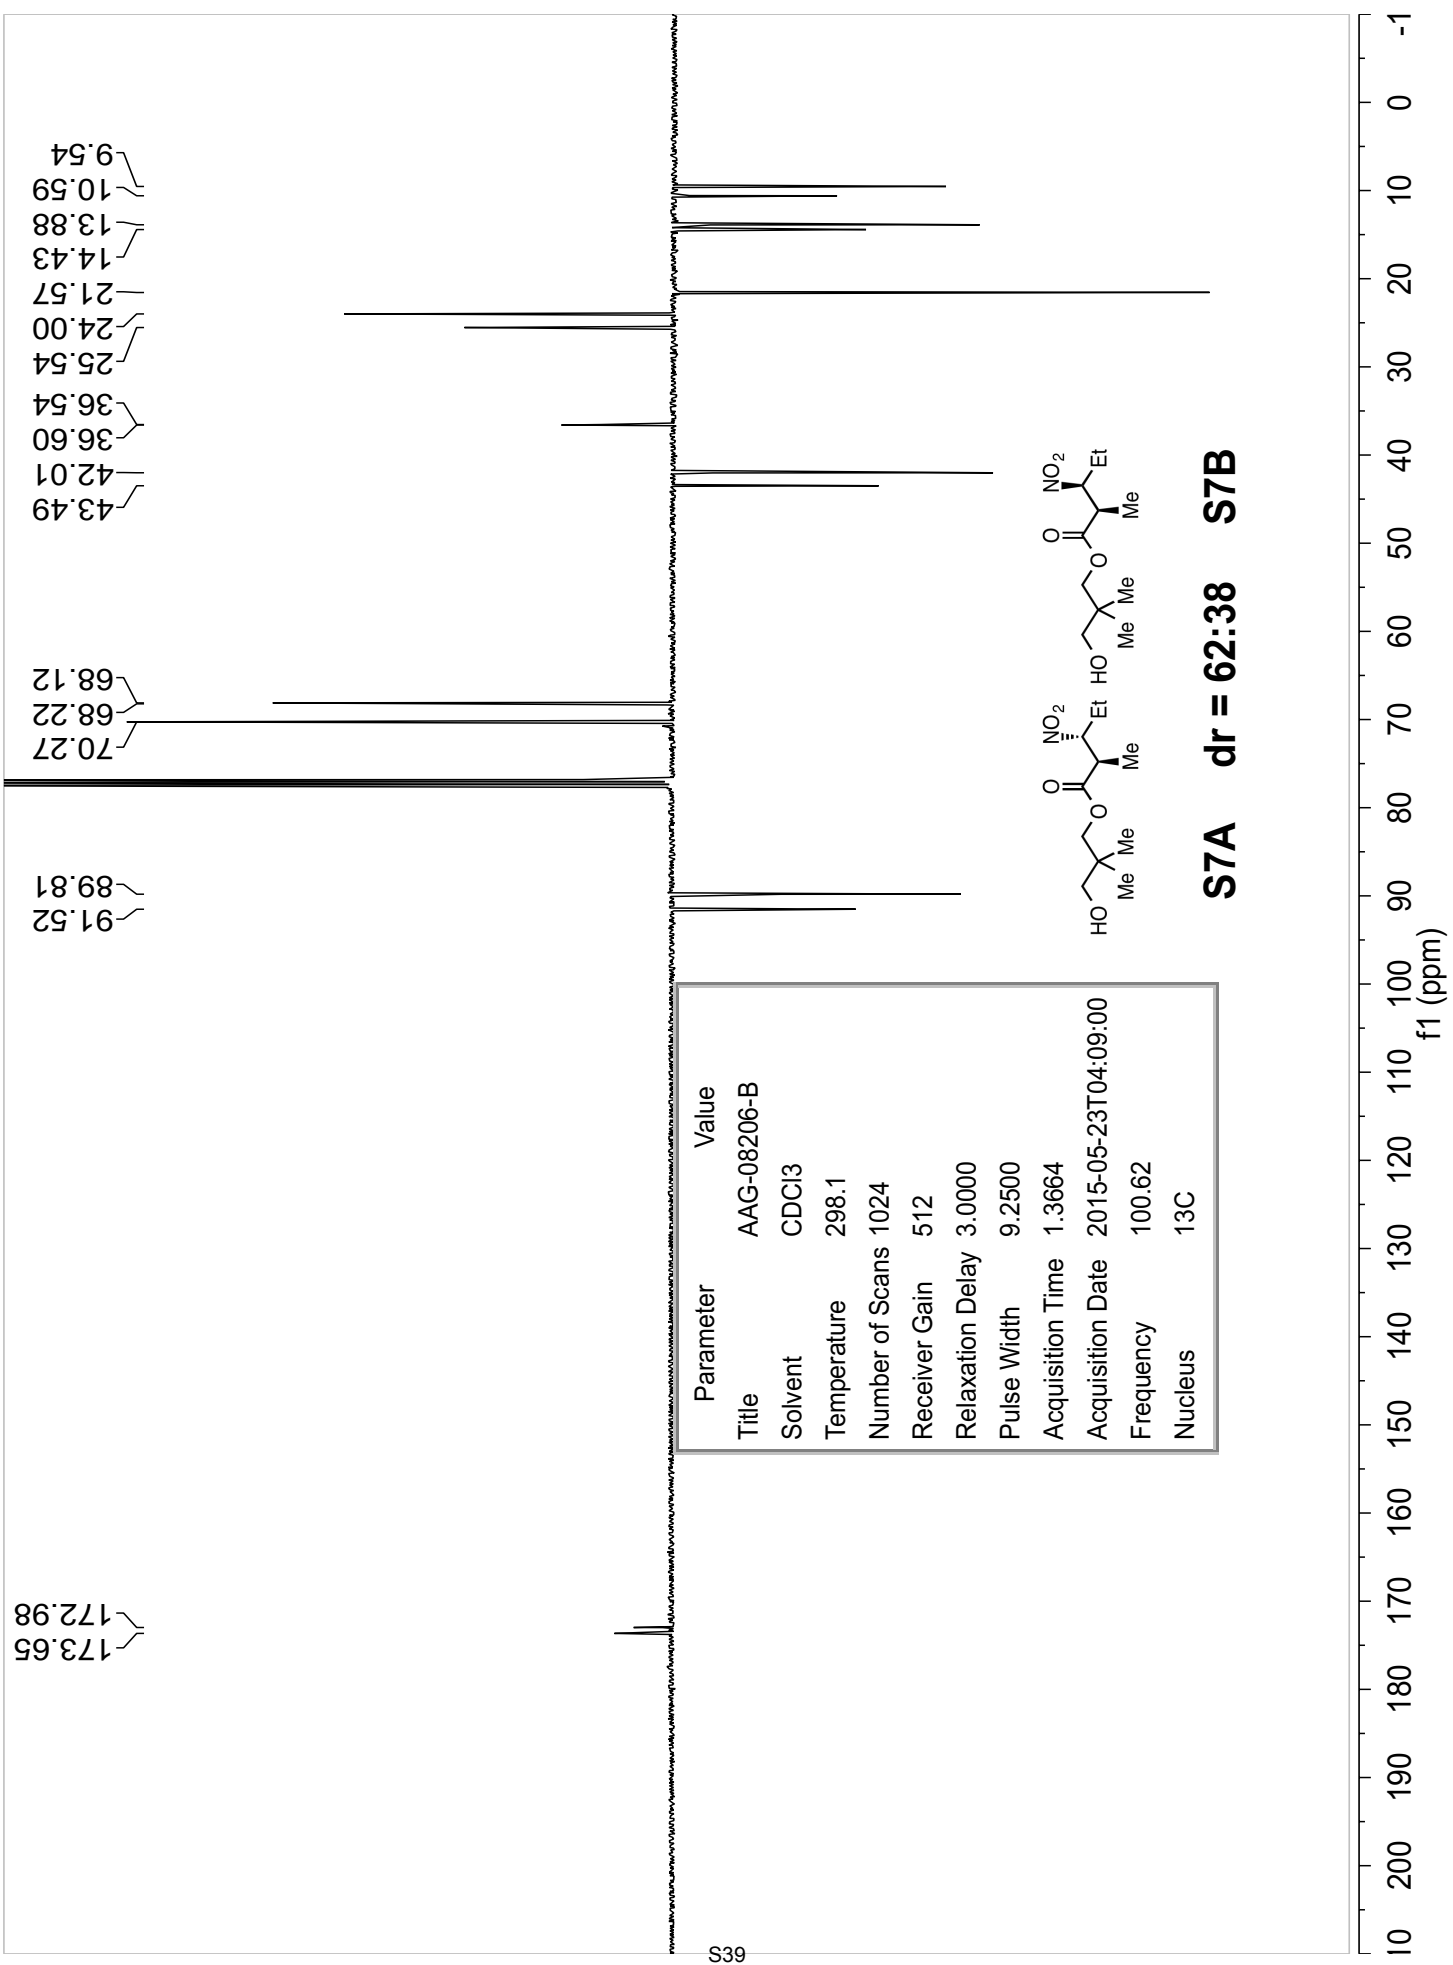

**S7A dr = 62:38 S7B**

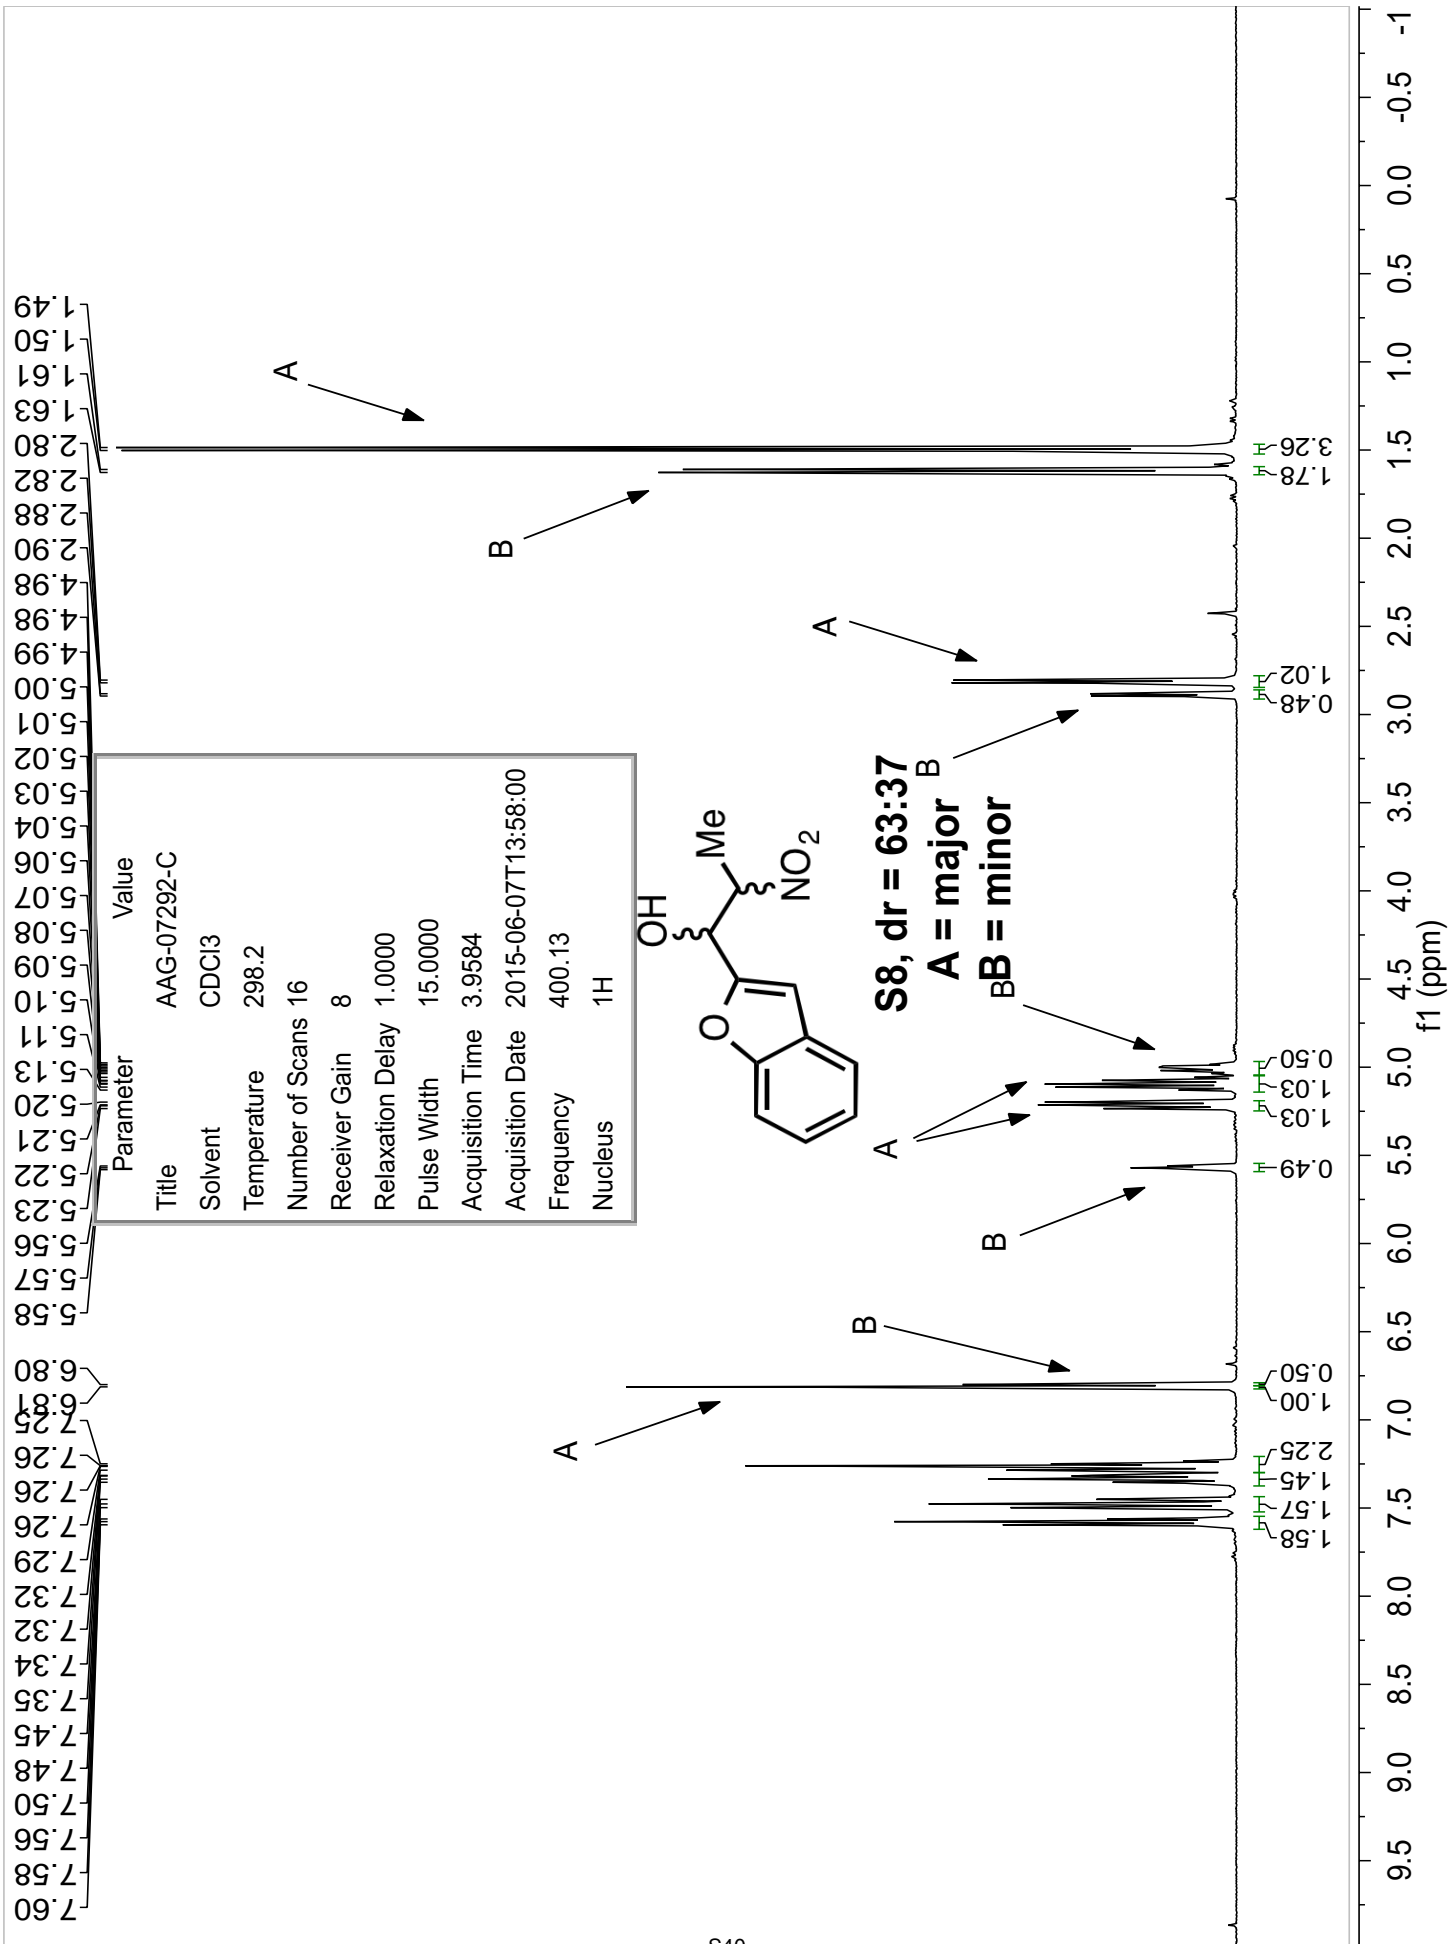



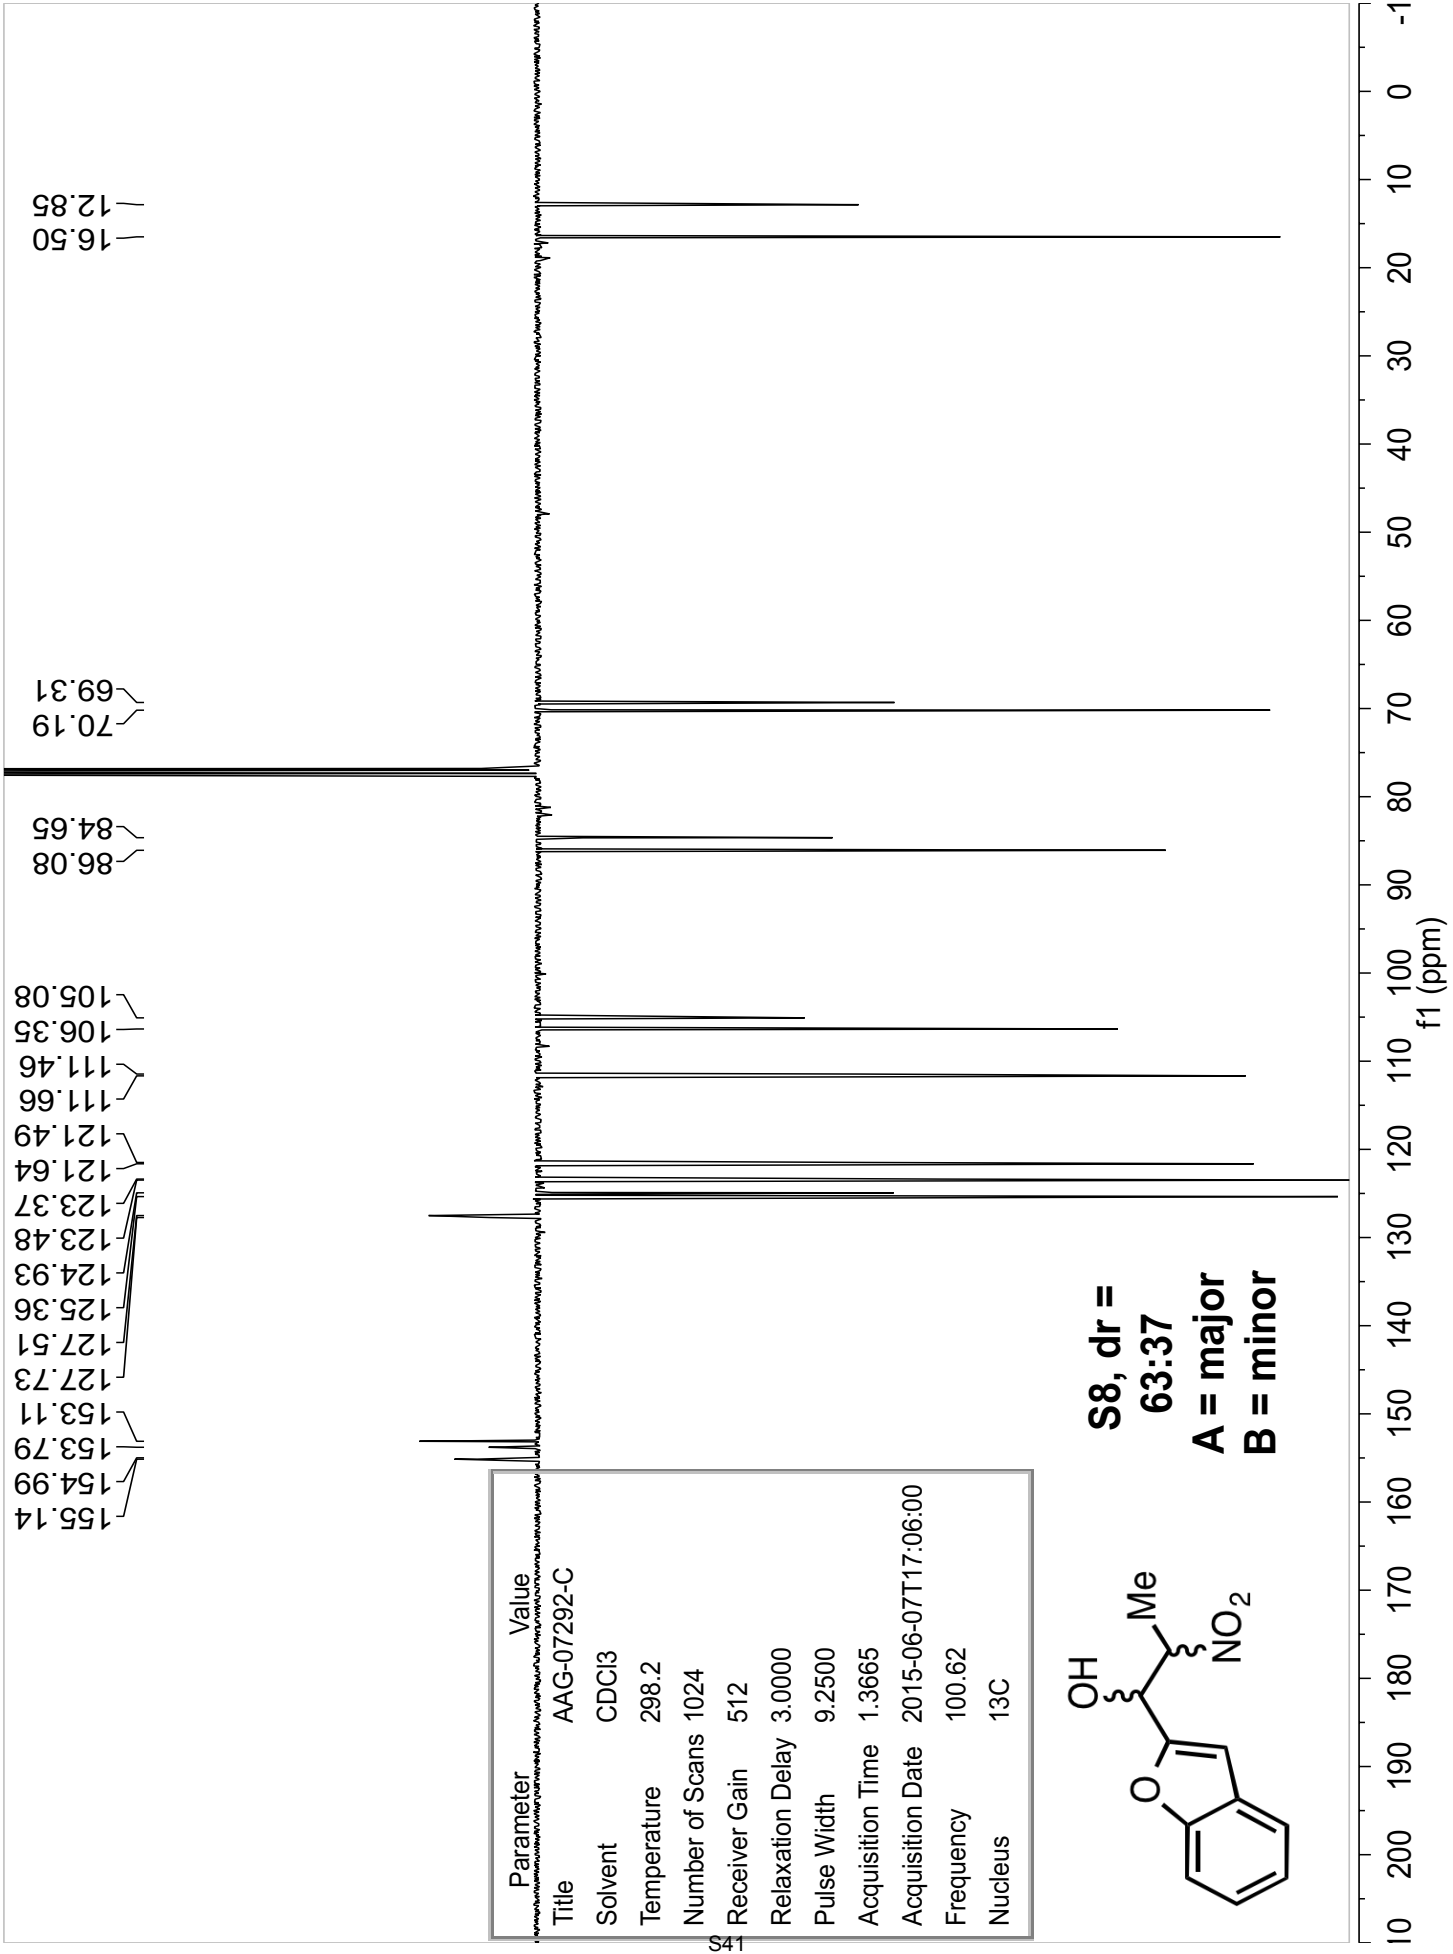

7.62 7.60 7.53 7.51 7.36 7.36 7.34 7.34 7.30 7.28 7.26 7.22 7.20 7.15 7.12 6.89 6.87 6.86 6.84 6.82 6.80 6.78 6.76 6.74 6.72 6.70 6.68 6.66 6.64 6.62 6.60 6.58 6.56 6.54 6.52 6.50 6.48 6.46 6.44 6.42 6.40 6.38 6.36 6.34 6.32 6.30 6.28 6.26 6.24 6.22 6.20 6.18 6.16 6.14 6.12 6.10 6.08 6.06 6.04 6.02 6.00 5.98 5.96 5.94 5.92 5.90 5.88 5.86 5.84 5.82 5.80 5.78 5.76 5.74 5.72 5.70 5.68 5.66 5.64 5.62 5.60 5.58 5.56 5.54 5.52 5.50 5.48 5.46 5.44 5.42 5.40 5.38 5.36 5.34 5.32 5.30 5.28 5.26 5.24 5.22 5.20 5.18 5.16 5.14 5.12 5.10 5.08 5.06 5.04 5.02 5.00 4.98 4.96 4.94 4.92 4.90 4.88 4.86 4.84 4.82 4.80 4.78 4.76 4.74 4.72 4.70 4.68 4.66 4.64 4.62 4.60 4.58 4.56 4.54 4.52 4.50 4.48 4.46 4.44 4.42 4.40 4.38 4.36 4.34 4.32 4.30 4.28 4.26 4.24 4.22 4.20 4.18 4.16 4.14 4.12 4.10 4.08 4.06 4.04 4.02 4.00 3.98 3.96 3.94 3.92 3.90 3.88 3.86 3.84 3.82 3.80 3.78 3.76 3.74 3.72 3.70 3.68 3.66 3.64 3.62 3.60 3.58 3.56 3.54 3.52 3.50 3.48 3.46 3.44 3.42 3.40 3.38 3.36 3.34 3.32 3.30 3.28 3.26 3.24 3.22 3.20 3.18 3.16 3.14 3.12 3.10 3.08 3.06 3.04 3.02 3.00 2.98 2.96 2.94 2.92 2.90 2.88 2.86 2.84 2.82 2.80 2.78 2.76 2.74 2.72 2.70 2.68 2.66 2.64 2.62 2.60 2.58 2.56 2.54 2.52 2.50 2.48 2.46 2.44 2.42 2.40 2.38 2.36 2.34 2.32 2.30 2.28 2.26 2.24 2.22 2.20 2.18 2.16 2.14 2.12 2.10 2.08 2.06 2.04 2.02 2.00 1.98 1.96 1.94 1.92 1.90 1.88 1.86 1.84 1.82 1.80 1.78 1.76 1.74 1.72 1.70 1.68 1.66 1.64 1.62 1.60 1.58 1.56 1.54 1.52 1.50 1.48 1.46 1.44 1.42 1.40 1.38 1.36 1.34 1.32 1.30 1.28 1.26 1.24 1.22 1.20 1.18 1.16 1.14 1.12 1.10 1.08 1.06 1.04 1.02 1.00 0.98 0.96 0.94 0.92 0.90 0.88 0.86 0.84 0.82 0.80 0.78 0.76 0.74 0.72 0.70 0.68 0.66 0.64 0.62 0.60 0.58 0.56 0.54 0.52 0.50 0.48 0.46 0.44 0.42 0.40 0.38 0.36 0.34 0.32 0.30 0.28 0.26 0.24 0.22 0.20 0.18 0.16 0.14 0.12 0.10 0.08 0.06 0.04 0.02 0.00 -0.02 -0.04 -0.06 -0.08 -0.10 -0.12 -0.14 -0.16 -0.18 -0.20 -0.22 -0.24 -0.26 -0.28 -0.30 -0.32 -0.34 -0.36 -0.38 -0.40 -0.42 -0.44 -0.46 -0.48 -0.50 -0.52 -0.54 -0.56 -0.58 -0.60 -0.62 -0.64 -0.66 -0.68 -0.70 -0.72 -0.74 -0.76 -0.78 -0.80 -0.82 -0.84 -0.86 -0.88 -0.90 -0.92 -0.94 -0.96 -0.98 -1.00

| Parameter        | Value               |
|------------------|---------------------|
| Title            | AAG-08205-B         |
| Solvent          | CDCl3               |
| Temperature      | 298.2               |
| Number of Scans  | 16                  |
| Receiver Gain    | 11                  |
| Relaxation Delay | 1.0000              |
| Pulse Width      | 15.0000             |
| Acquisition Time | 3.9584              |
| Acquisition Date | 2015-06-08T13:24:00 |
| Frequency        | 400.13              |
| Nucleus          | 1H                  |

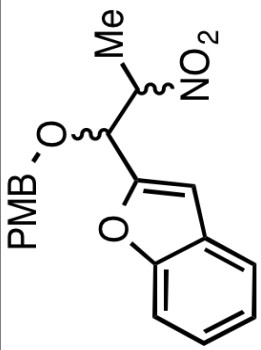

**S9, dr = 79:21**  
**A = major**  
**B = minor**

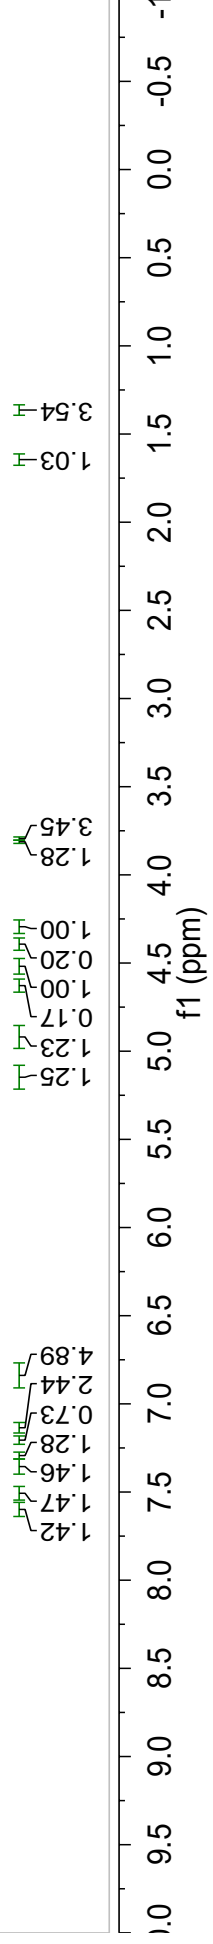

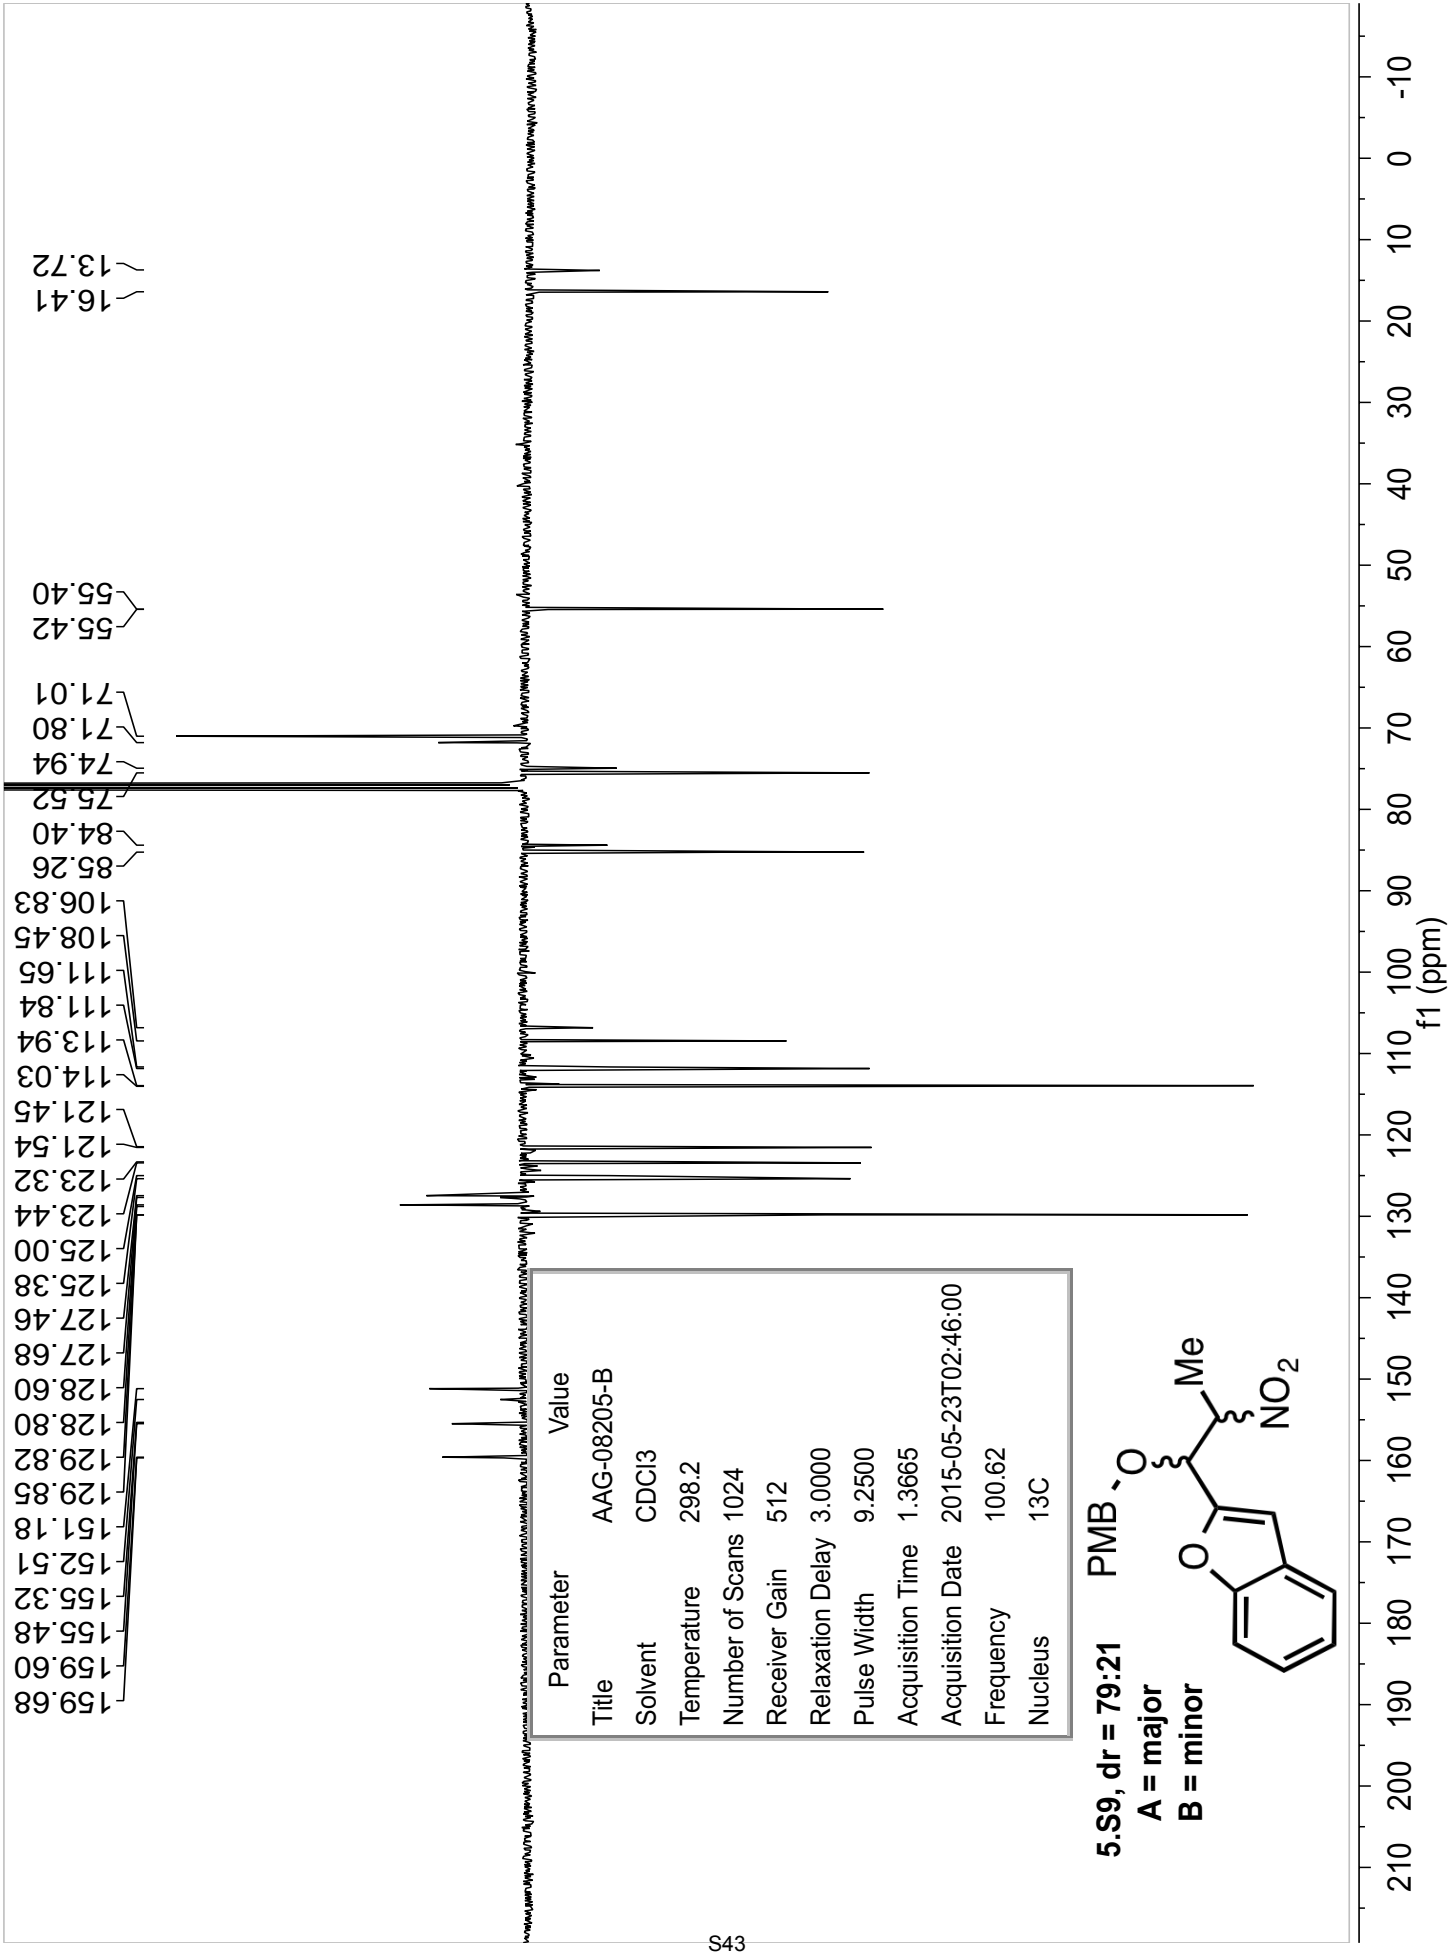

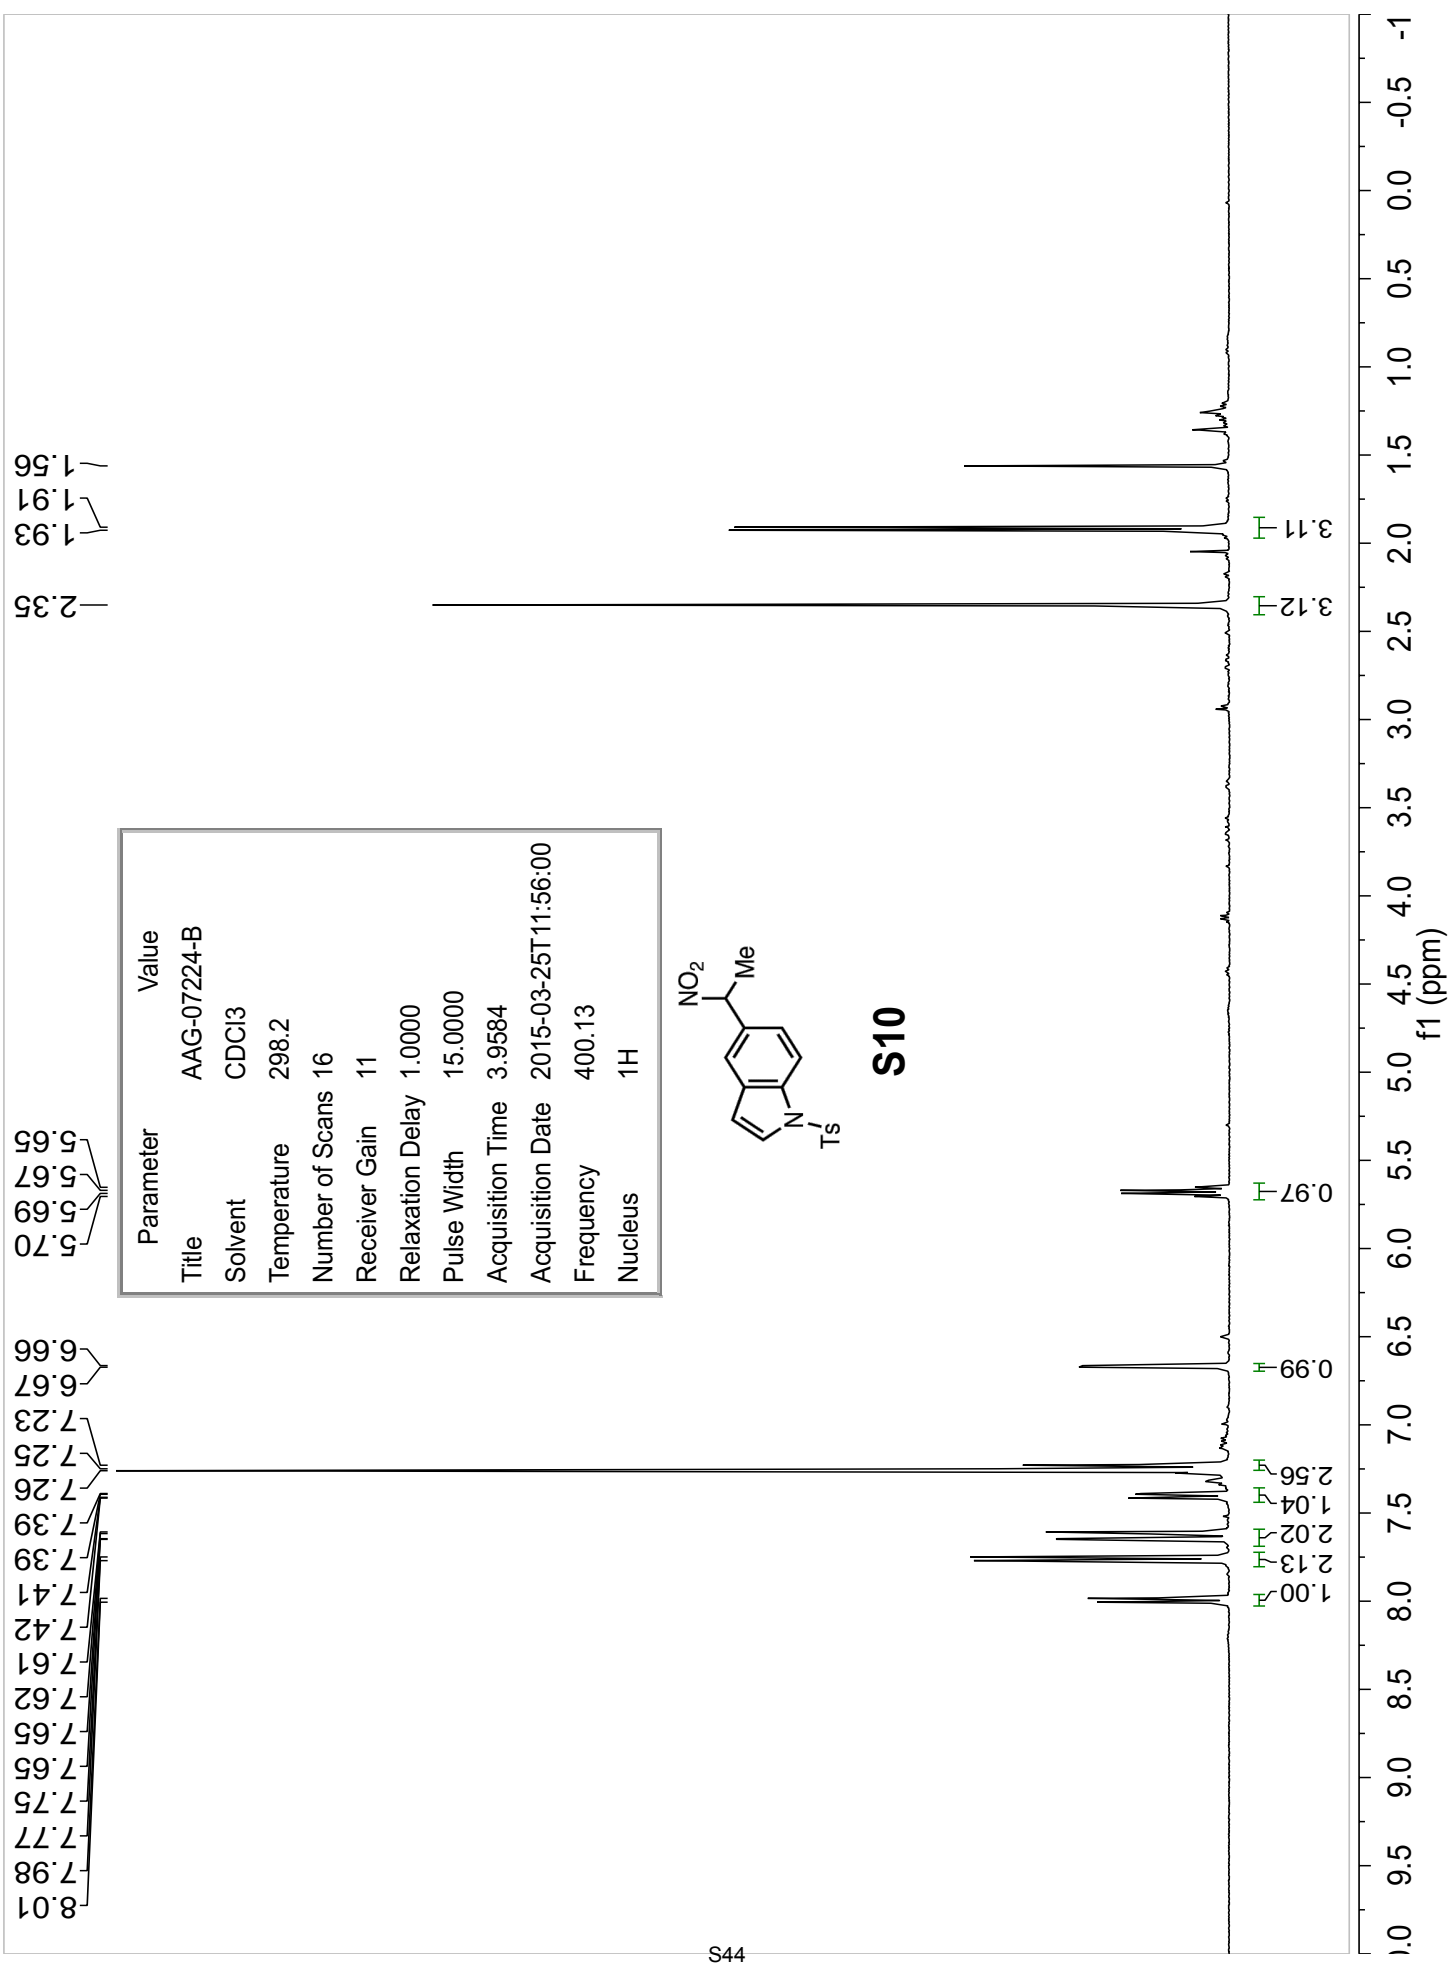

| Parameter        | Value               |
|------------------|---------------------|
| Title            | AAG-07224-B         |
| Solvent          | CDCl3               |
| Temperature      | 298.2               |
| Number of Scans  | 16                  |
| Receiver Gain    | 11                  |
| Relaxation Delay | 1.0000              |
| Pulse Width      | 15.0000             |
| Acquisition Time | 3.9584              |
| Acquisition Date | 2015-03-25T11:56:00 |
| Frequency        | 400.13              |
| Nucleus          | 1H                  |

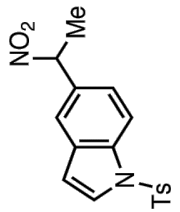

**S10**

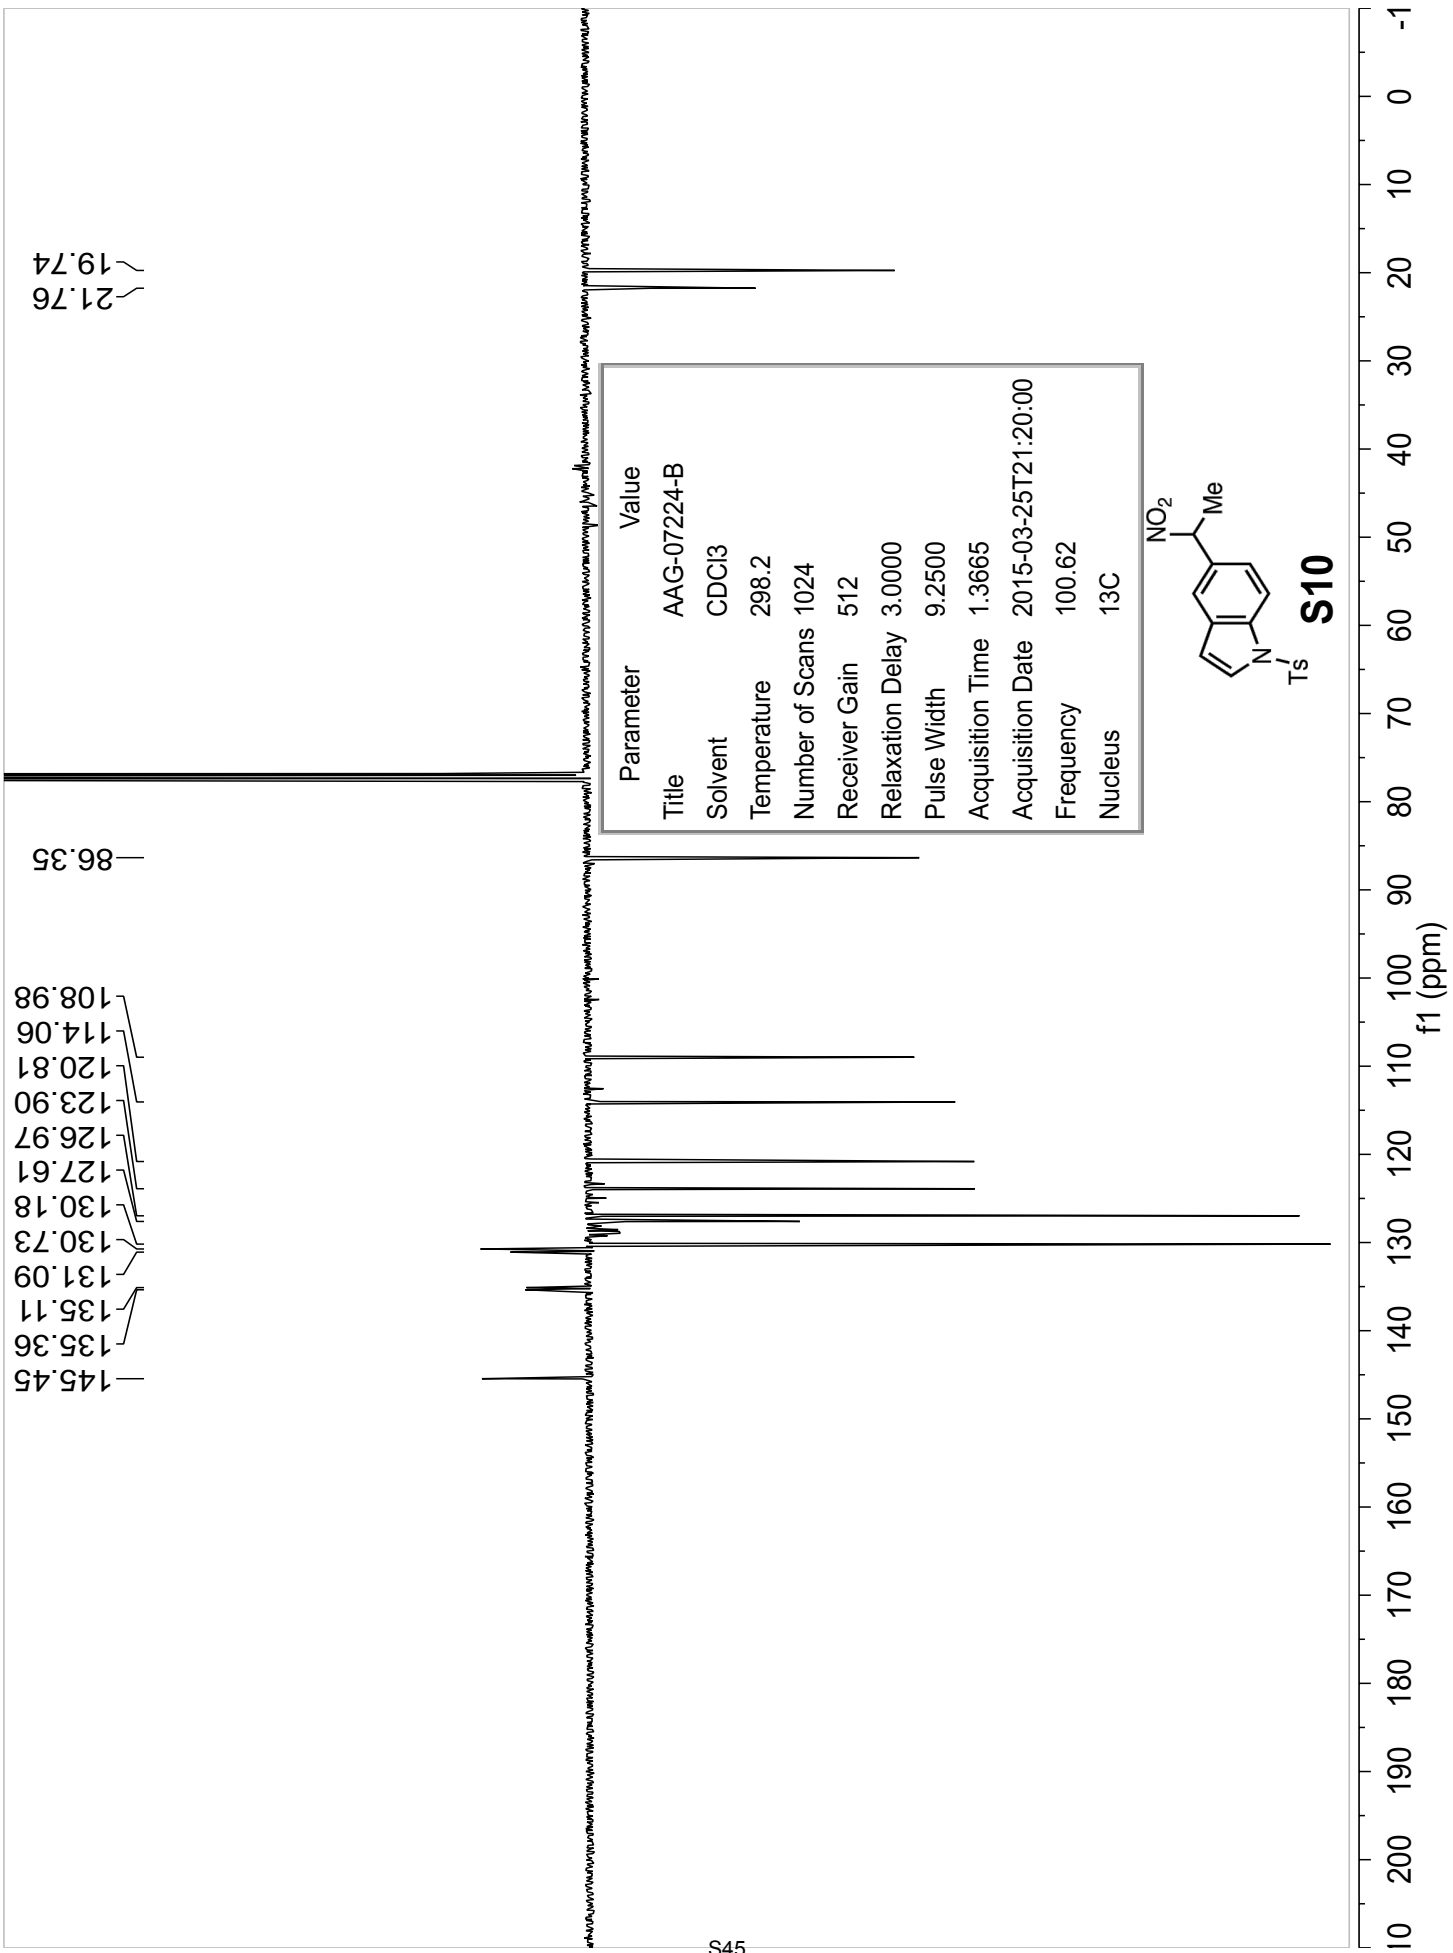

| Parameter                | Value             |
|--------------------------|-------------------|
| 1 Title                  | DVR03295CRD.1.fid |
| 2 Solvent                | CDCl3             |
| 3 Temperature            | 298.2             |
| 4 Number of Scans        | 16                |
| 5 Receiver Gain          | 9                 |
| 6 Relaxation Delay       | 1.0000            |
| 7 Pulse Width            | 15.0000           |
| 8 Spectrometer Frequency | 400.13            |
| 9 Nucleus                | <sup>1</sup> H    |

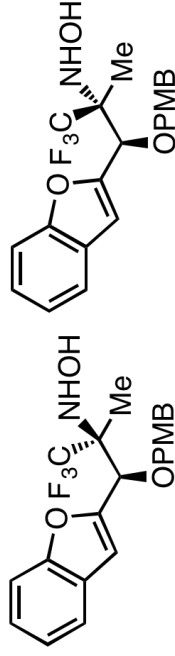

**S12A**      **crude-S12**  
**93:07**

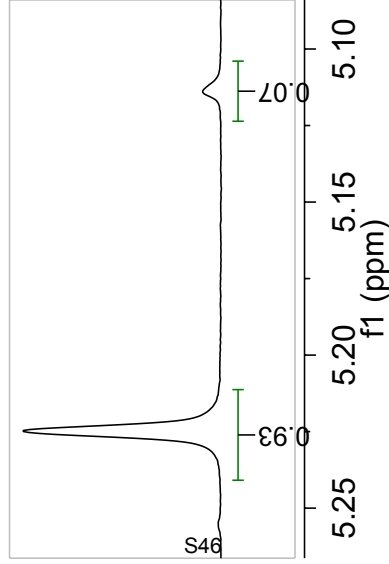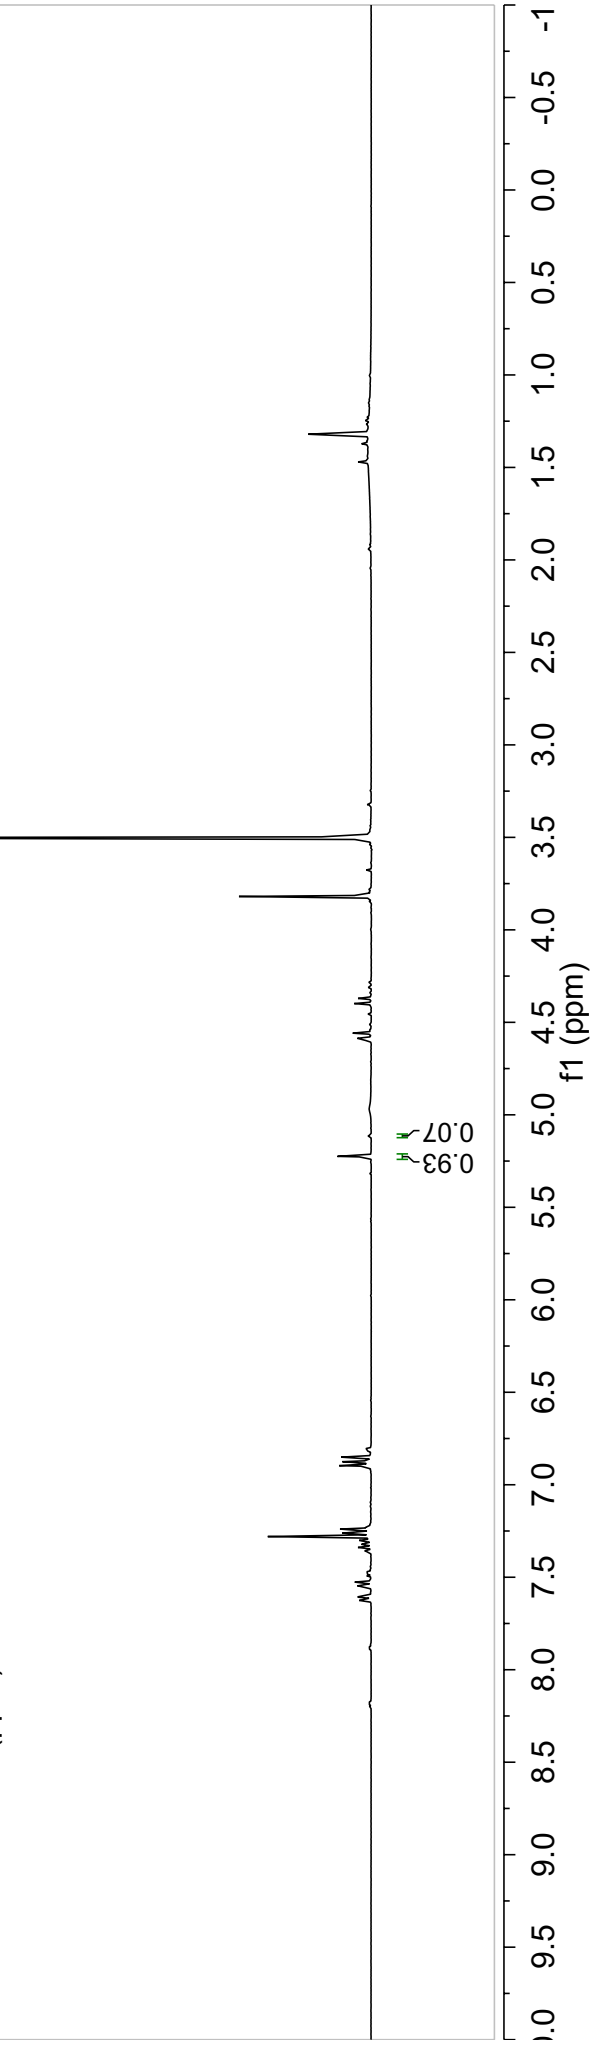

8.32 7.97 7.60 7.59 7.52 7.51 7.34 7.33 7.32 7.32 7.32 7.32 7.31 7.31 7.28 7.28 7.27 7.27 7.25 7.24 7.24 7.24 7.23 7.23 7.23 7.22 6.88 6.88 6.87 6.87 6.86 6.86 6.83 5.40 5.39 5.20 4.65 4.65 4.57 4.55 4.38 4.37 3.80 1.31 1.31

| Parameter        | Value               |
|------------------|---------------------|
| Title            | DVR03295.1.fid      |
| Solvent          | CDCl3               |
| Temperature      | 300.0               |
| Number of Scans  | 16                  |
| Receiver Gain    | 181                 |
| Relaxation Delay | 1.0000              |
| Pulse Width      | 10.7700             |
| Acquisition Time | 2.7263              |
| Acquisition Date | 2016-03-23T13:54:00 |

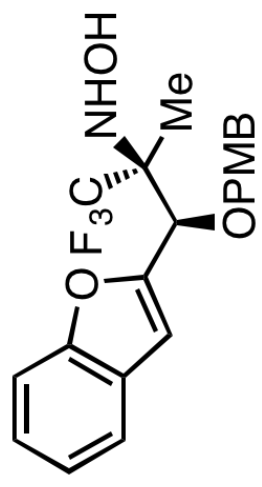

**S12**

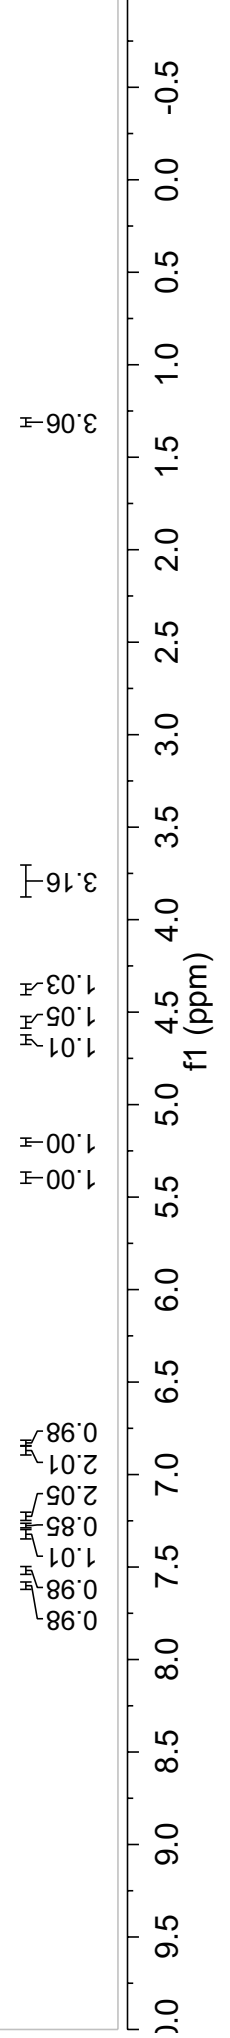

159.57  
155.29  
153.41

129.79  
129.45  
129.31  
127.87  
127.54  
125.63  
124.75  
123.72  
123.25  
121.32  
113.94  
111.66  
107.41

73.76  
71.88  
67.10  
66.94  
66.78  
66.63  
55.41

13.23

| Parameter        | Value               |
|------------------|---------------------|
| Title            | DVR03295.3.fid      |
| Solvent          | CDCl3               |
| Temperature      | 300.0               |
| Number of Scans  | 1024                |
| Receiver Gain    | 2050                |
| Relaxation Delay | 5.0000              |
| Pulse Width      | 10.6300             |
| Acquisition Time | 0.9437              |
| Acquisition Date | 2016-03-23T23:55:00 |

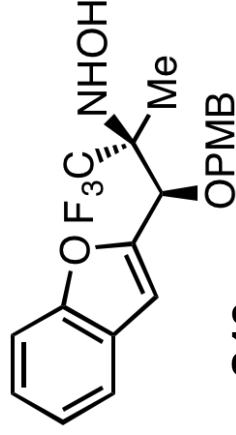

**S12**

8

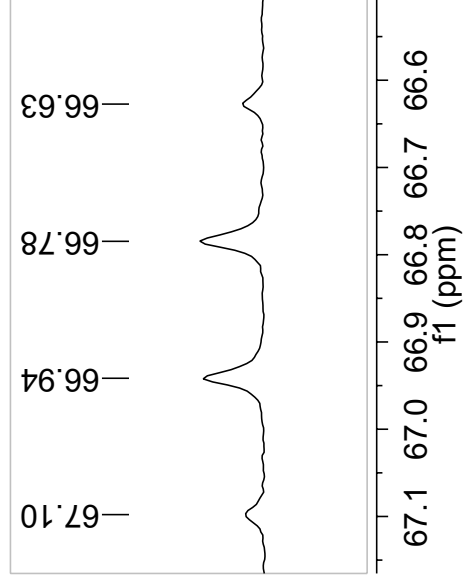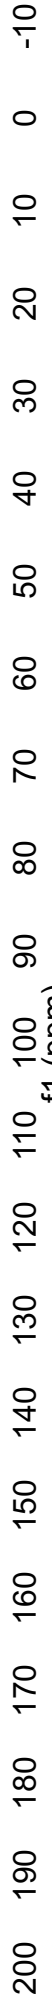



-71.90

| Parameter        | Value               |
|------------------|---------------------|
| Title            | DVR03295.2.fid      |
| Solvent          | CDCl3               |
| Temperature      | 300.0               |
| Number of Scans  | 16                  |
| Receiver Gain    | 362                 |
| Relaxation Delay | 3.0000              |
| Pulse Width      | 11.6200             |
| Acquisition Time | 0.4893              |
| Acquisition Date | 2016-03-23T13:57:00 |

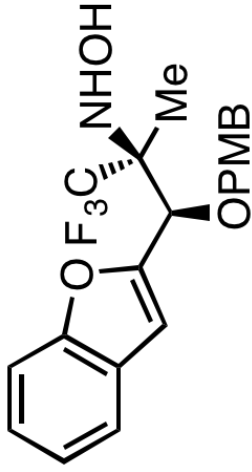

**S12**

85

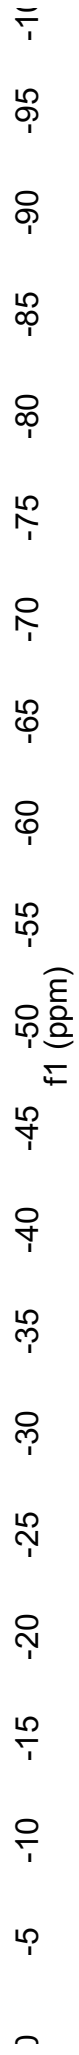

1.07  
1.08  
1.09  
2.02  
2.03  
2.04  
2.05  
2.07  
2.08  
2.18  
2.20  
2.21  
2.22  
2.23  
2.25  
3.33  
3.35  
3.50  
3.53

| Parameter        | Value               |
|------------------|---------------------|
| Title            | DVR03137FA.1.fid    |
| Solvent          | CDCl3               |
| Temperature      | 300.0               |
| Number of Scans  | 16                  |
| Receiver Gain    | 256                 |
| Relaxation Delay | 1.0000              |
| Pulse Width      | 10.7700             |
| Acquisition Time | 2.7263              |
| Acquisition Date | 2015-06-08T18:26:00 |

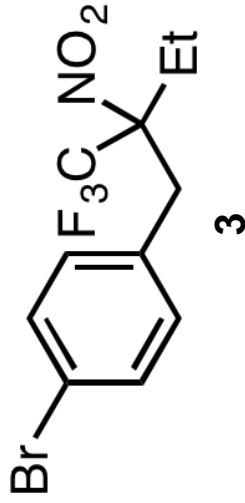

7.01  
7.02  
7.26  
7.44  
7.46

1.93  
0.62  
0.60  
0.57  
0.57

1.05  
1.00

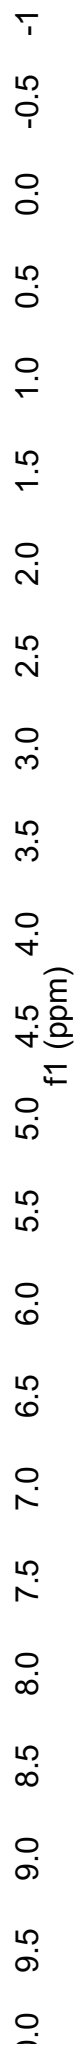

| Parameter        | Value               |
|------------------|---------------------|
| Title            | DVR03137FA.3.fid    |
| Solvent          | CDCl3               |
| Temperature      | 300.0               |
| Number of Scans  | 1024                |
| Receiver Gain    | 2050                |
| Relaxation Delay | 5.0000              |
| Pulse Width      | 10.6300             |
| Acquisition Time | 0.9437              |
| Acquisition Date | 2015-06-09T05:03:00 |

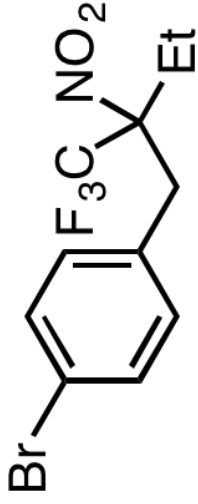

3

132.06  
132.05  
131.02  
126.03  
124.13  
122.64  
122.24  
120.34

94.55  
94.38  
94.21  
94.04

8.34

26.14

38.91

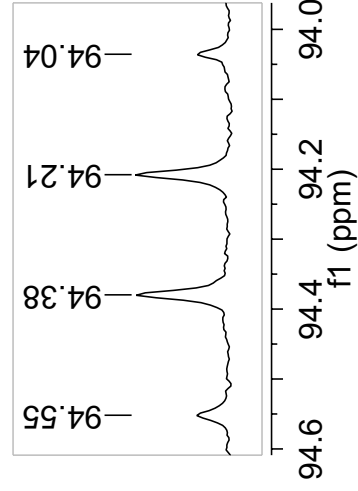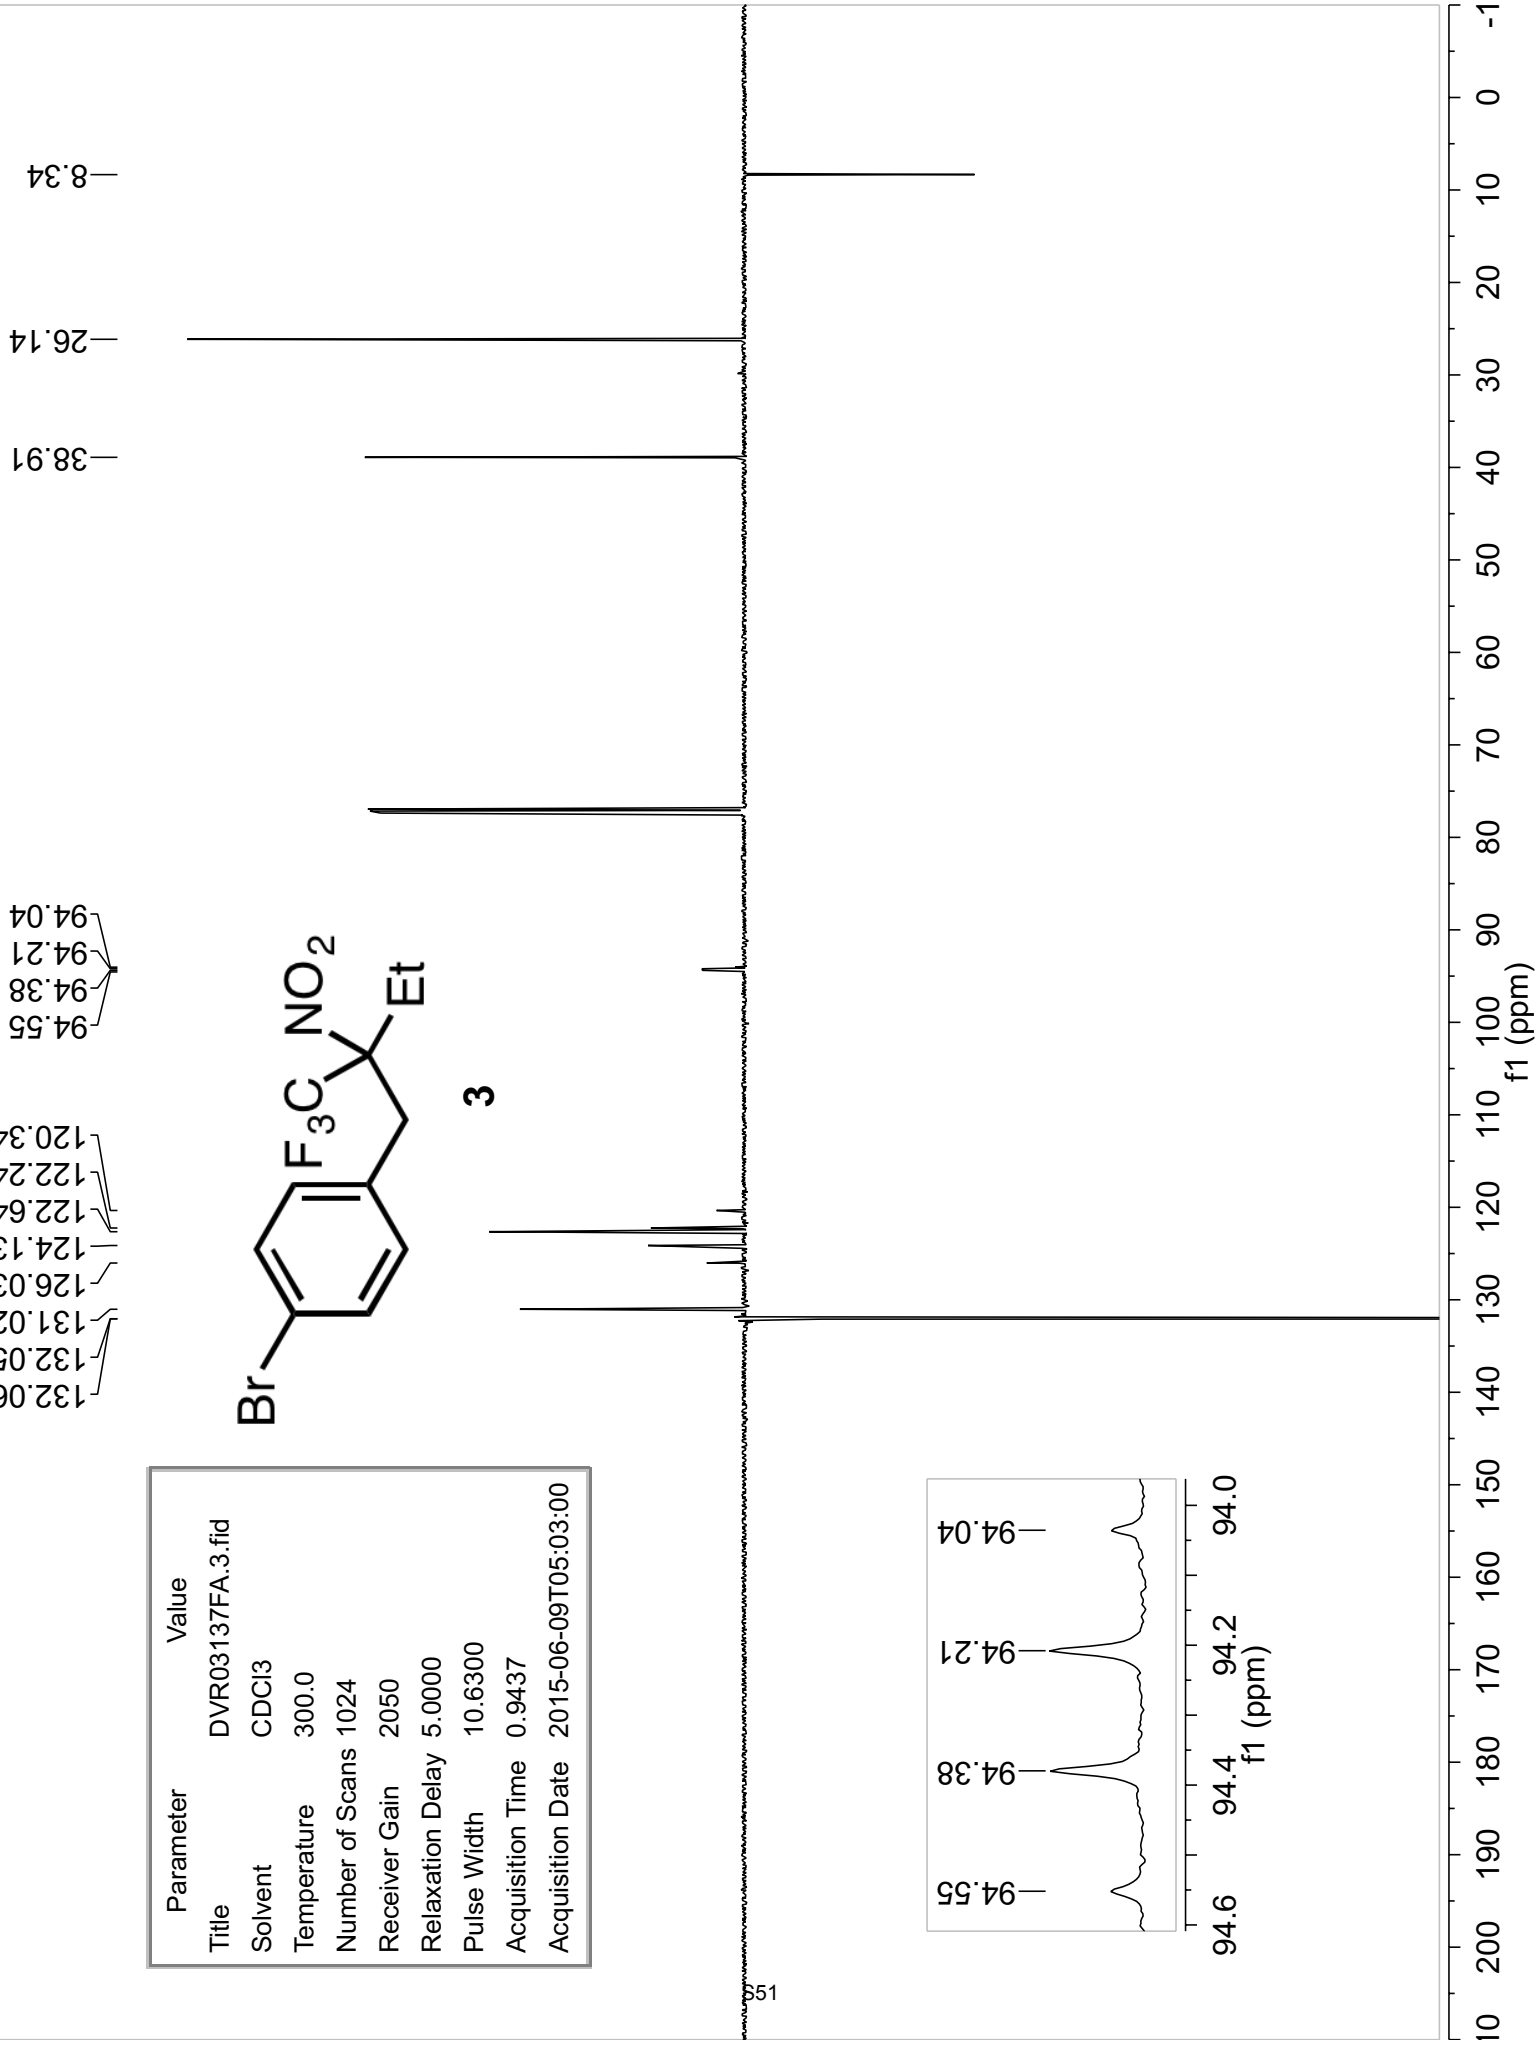

69.51

| Parameter        | Value               |
|------------------|---------------------|
| Title            | DVR03137FA.2.fid    |
| Solvent          | CDCl3               |
| Temperature      | 300.0               |
| Number of Scans  | 16                  |
| Receiver Gain    | 362                 |
| Relaxation Delay | 3.0000              |
| Pulse Width      | 11.6200             |
| Acquisition Time | 0.4893              |
| Acquisition Date | 2015-06-08T18:29:00 |

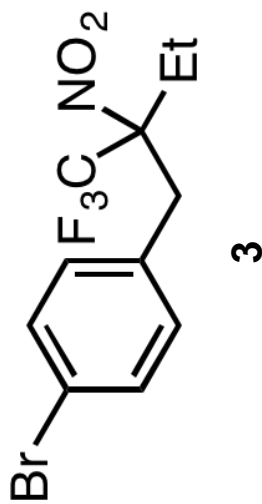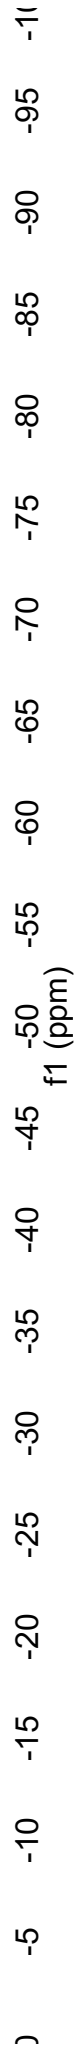

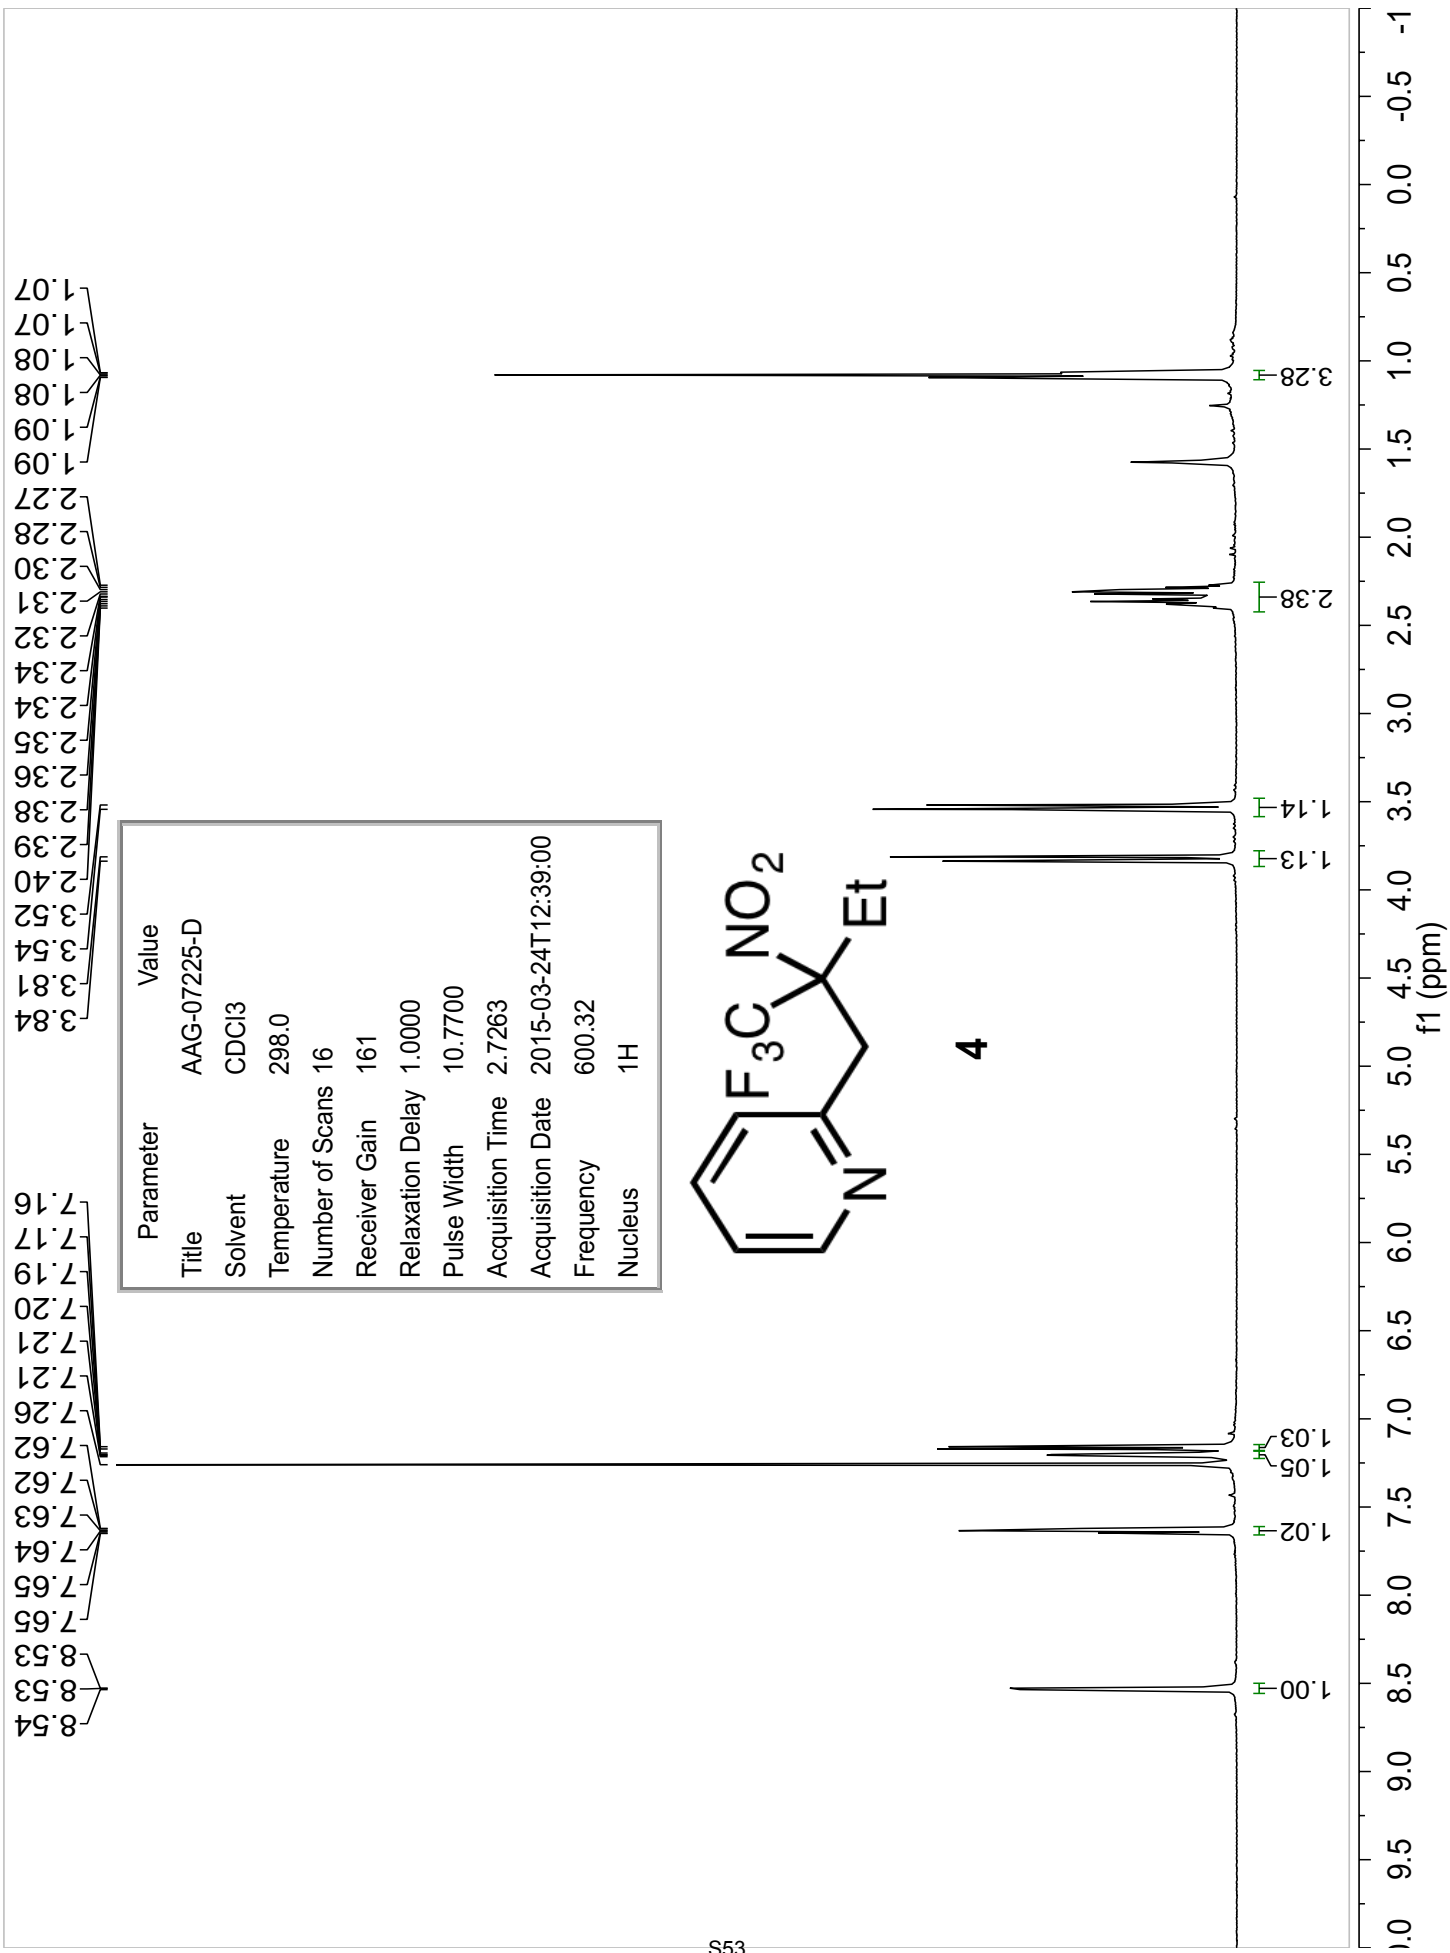

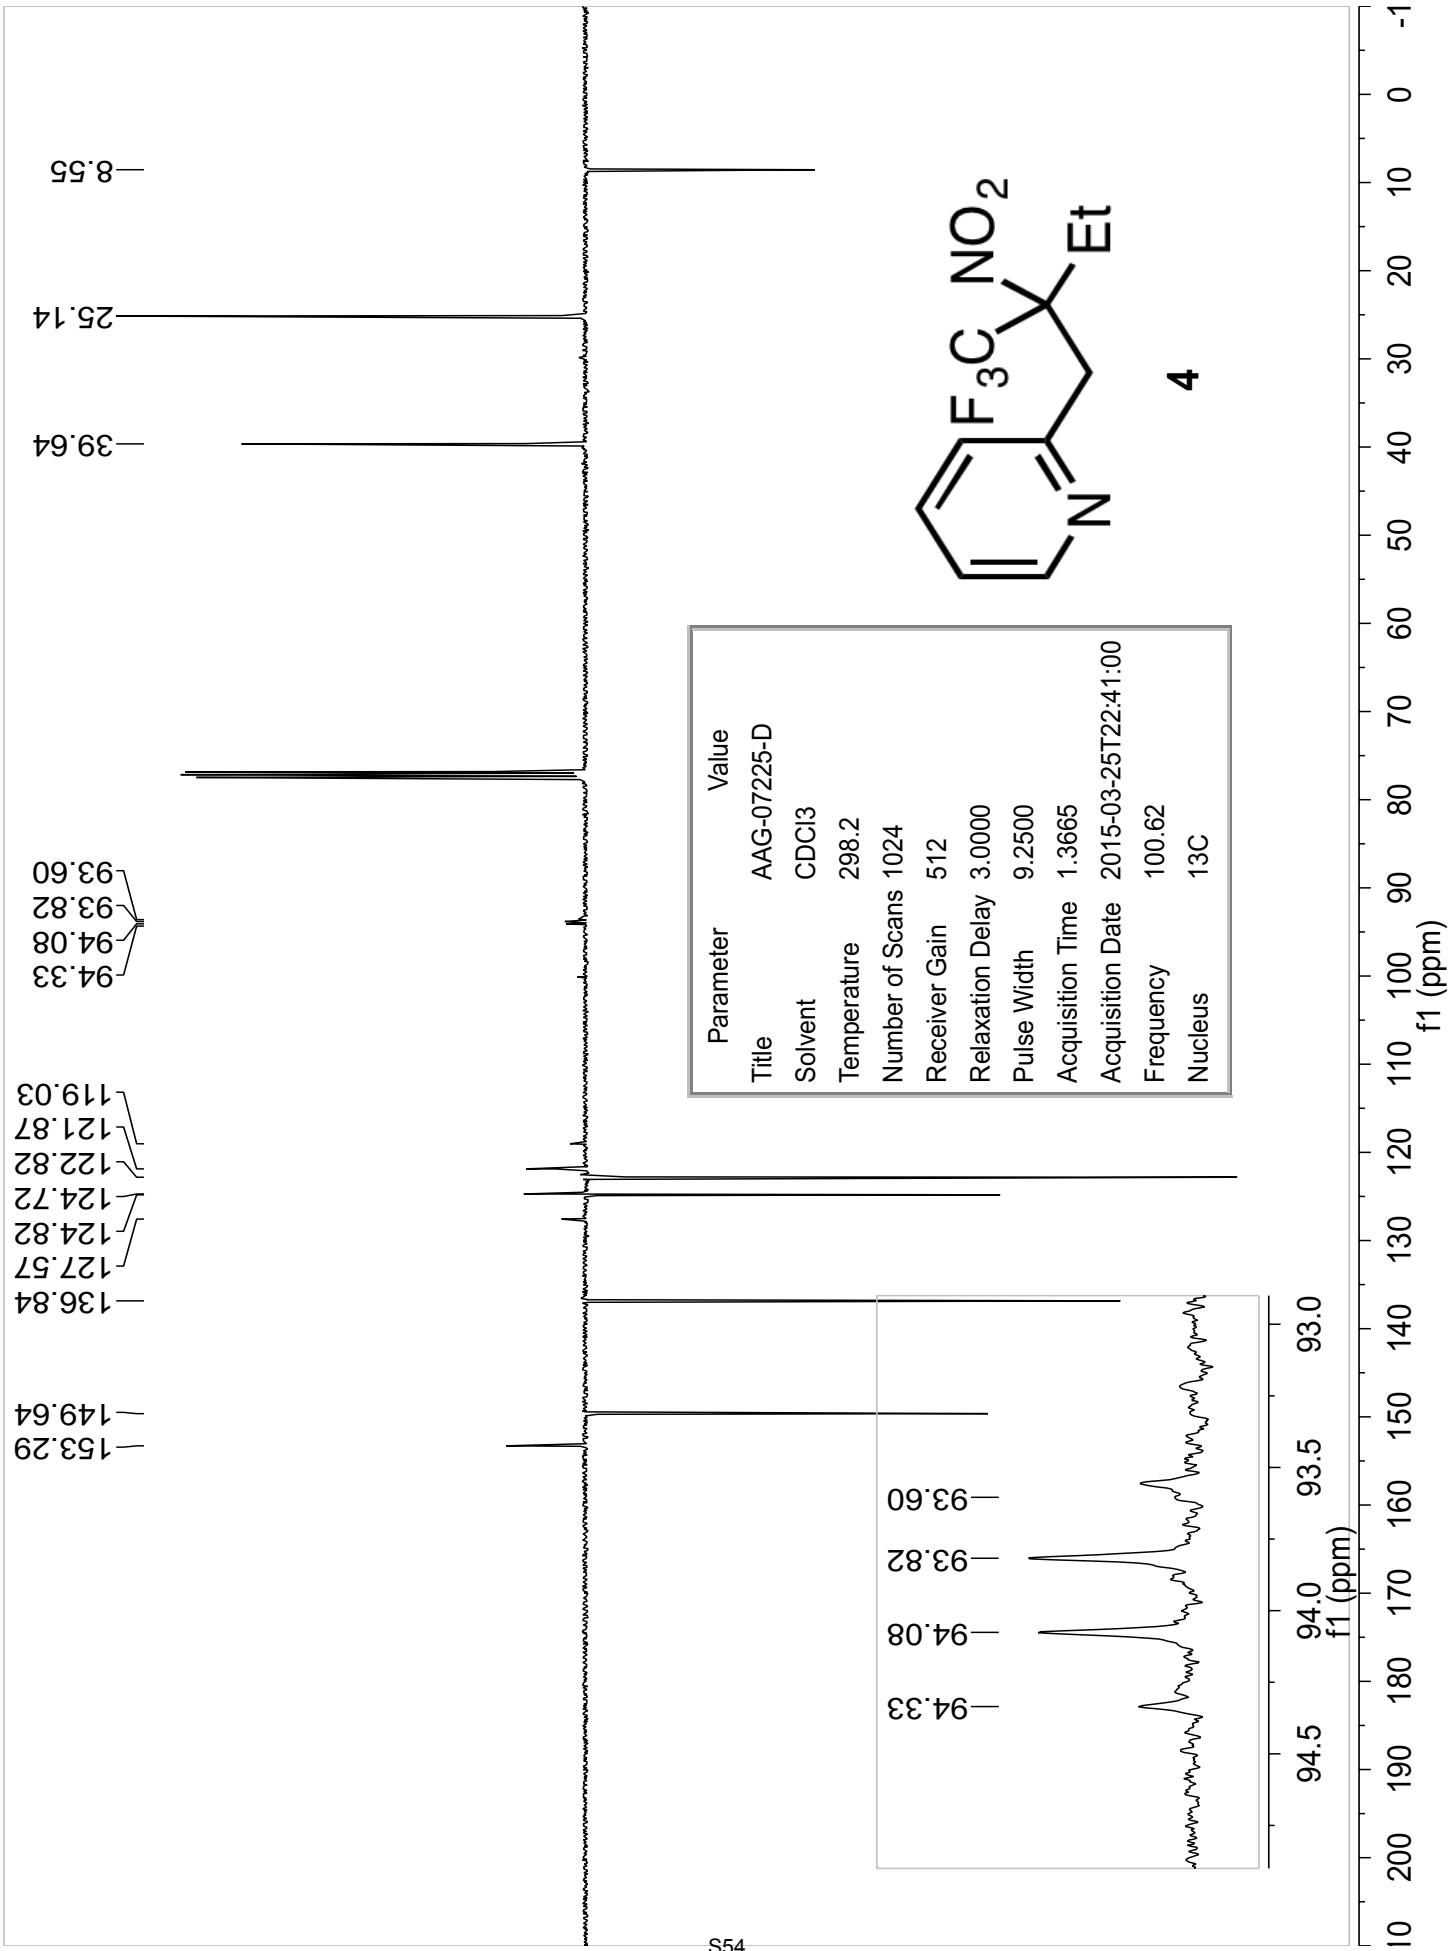

-71.34

| Parameter        | Value               |
|------------------|---------------------|
| Title            | AAG-07225-D/ 20     |
| Solvent          | CDCl <sub>3</sub>   |
| Temperature      | 298.0               |
| Number of Scans  | 16                  |
| Receiver Gain    | 362                 |
| Relaxation Delay | 3.0000              |
| Pulse Width      | 11.6200             |
| Acquisition Time | 0.4888              |
| Acquisition Date | 2015-03-23T22:03:27 |
| Frequency        | 564.81              |
| Nucleus          | <sup>19</sup> F     |

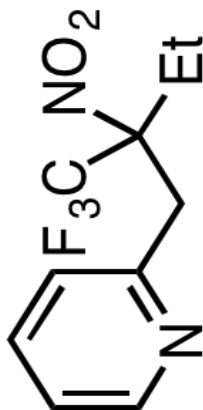

4

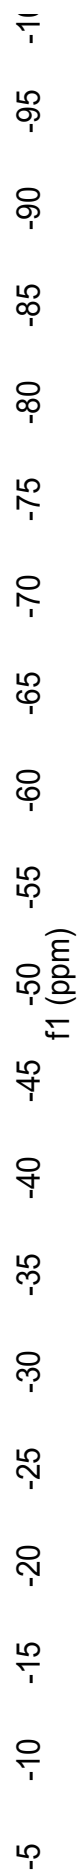

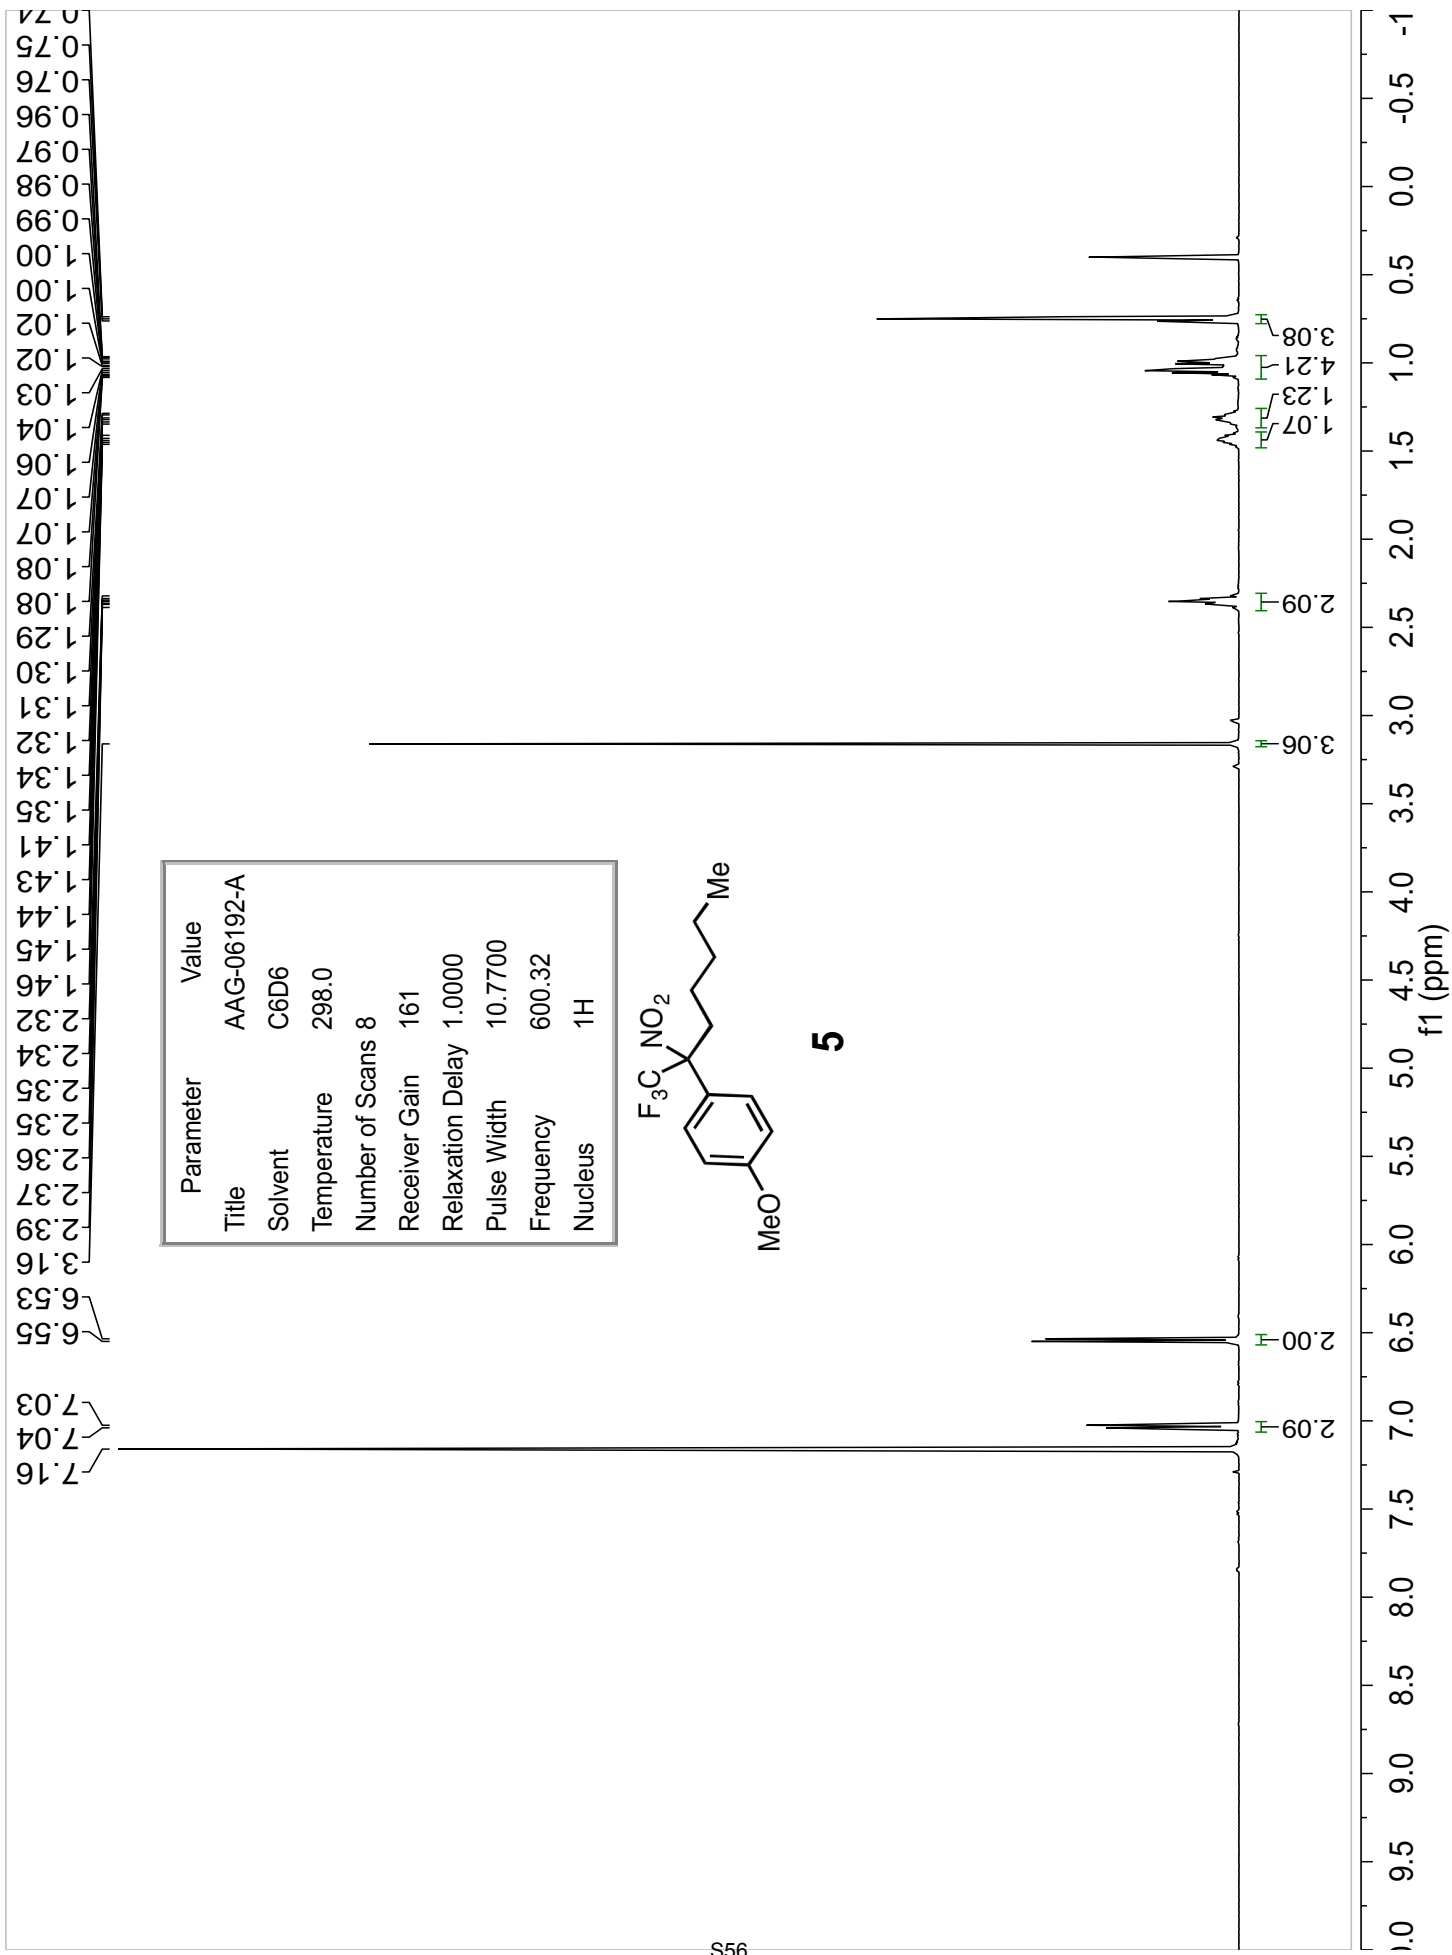



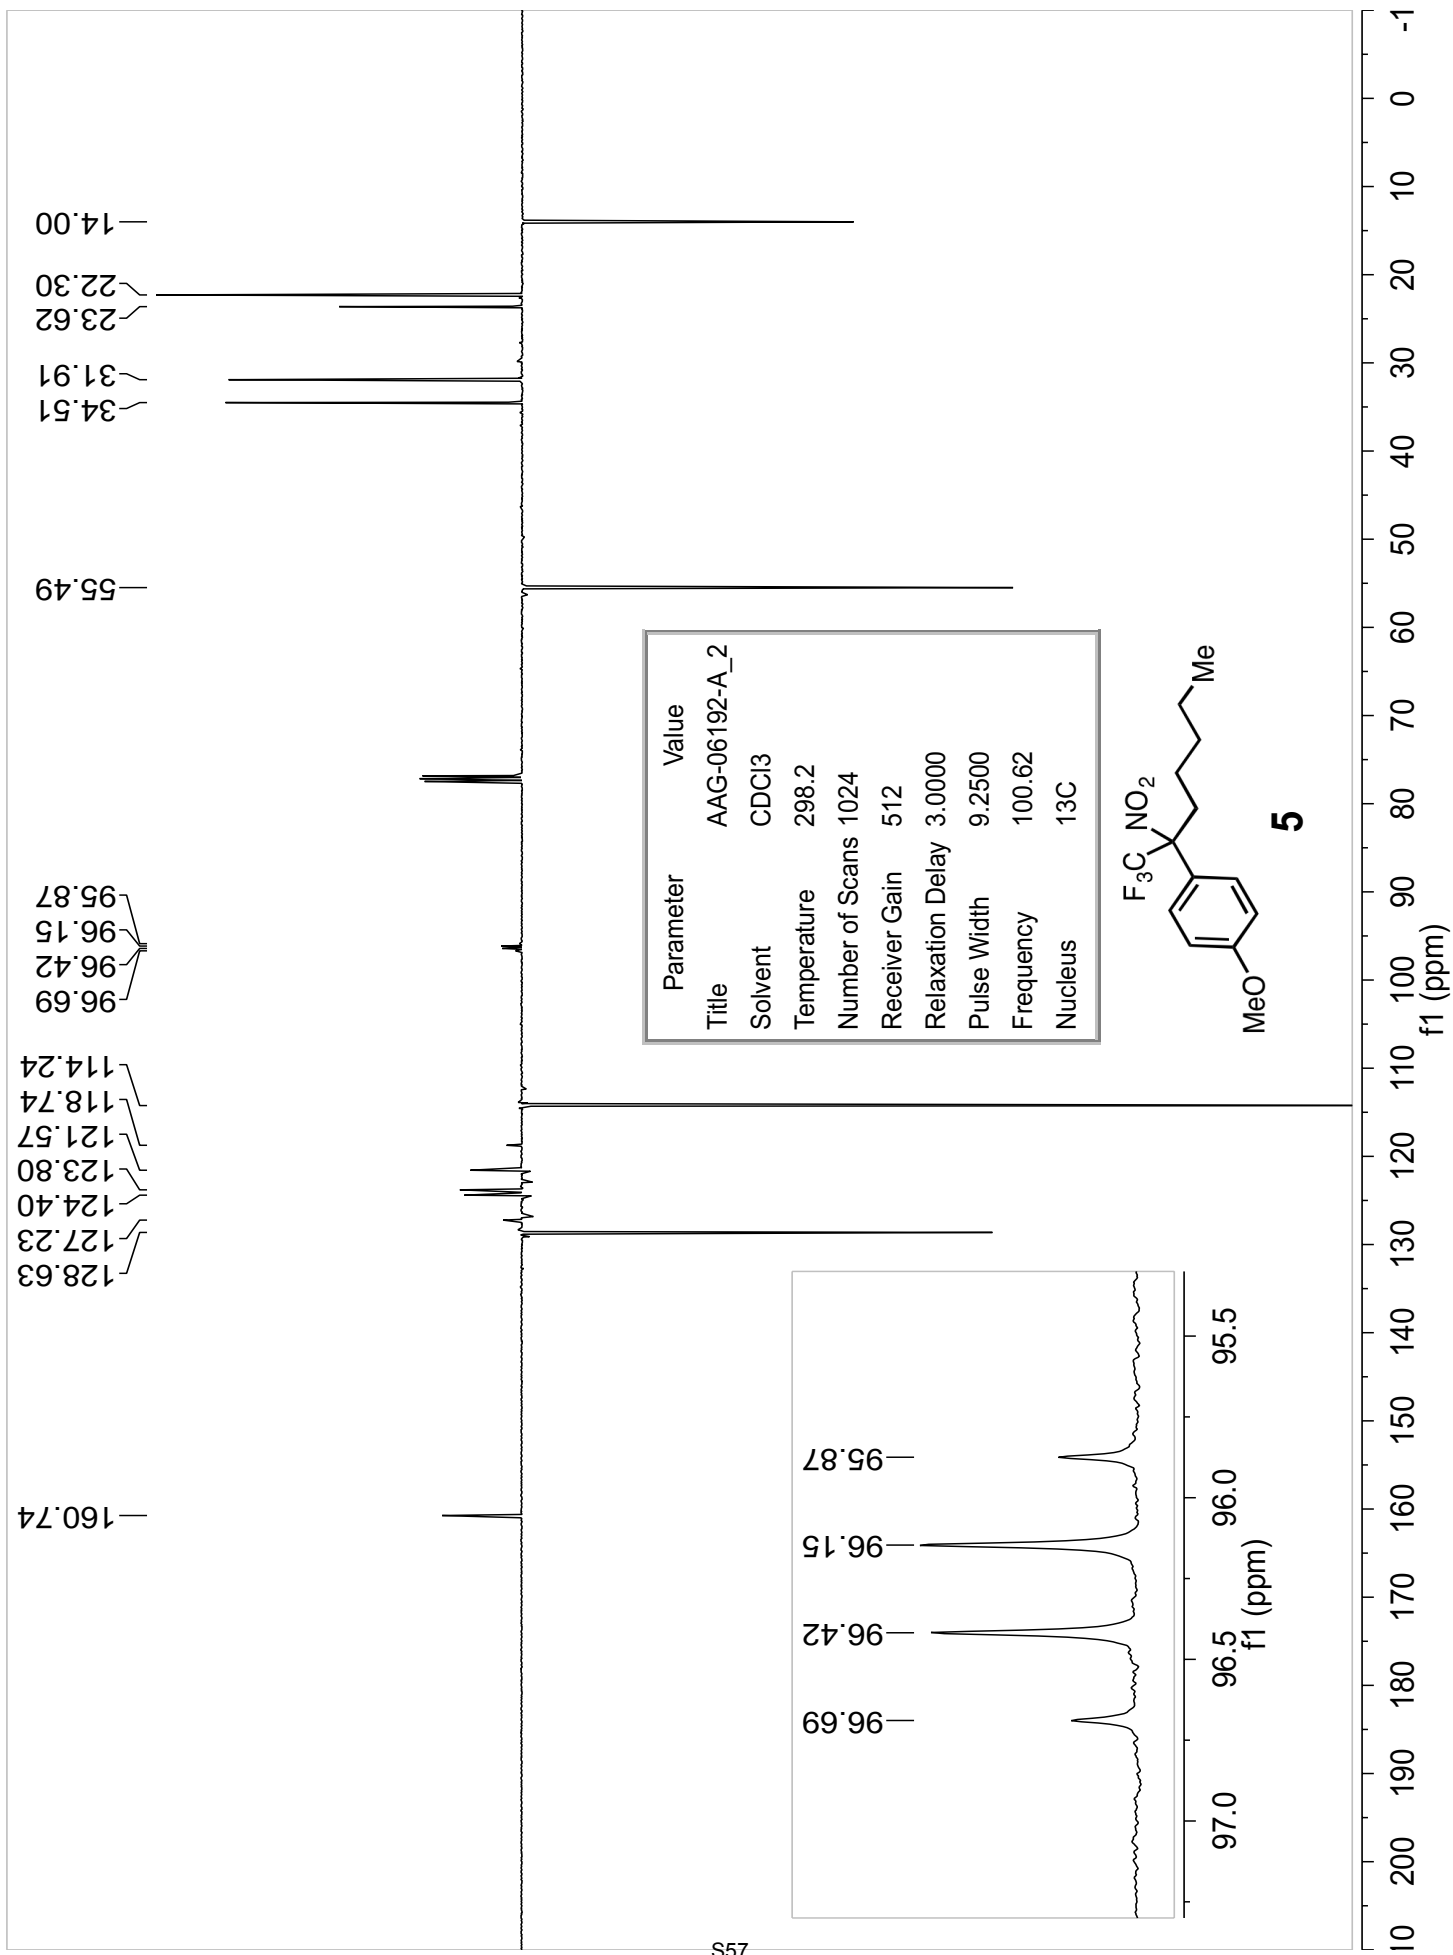

| Parameter        | Value             |
|------------------|-------------------|
| Title            | AAG-06192-A       |
| Solvent          | CDCl <sub>3</sub> |
| Temperature      | 298.0             |
| Number of Scans  | 16                |
| Receiver Gain    | 322               |
| Relaxation Delay | 3.0000            |
| Pulse Width      | 11.6200           |
| Frequency        | 564.81            |
| Nucleus          | <sup>19</sup> F   |

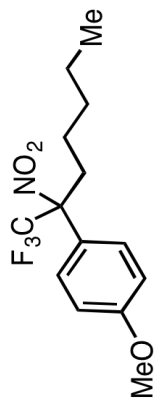

5

-69.18

-5 -10 -15 -20 -25 -30 -35 -40 -45 -50 -55 -60 -65 -70 -75 -80 -85 -90 -95 -100

f1 (ppm)



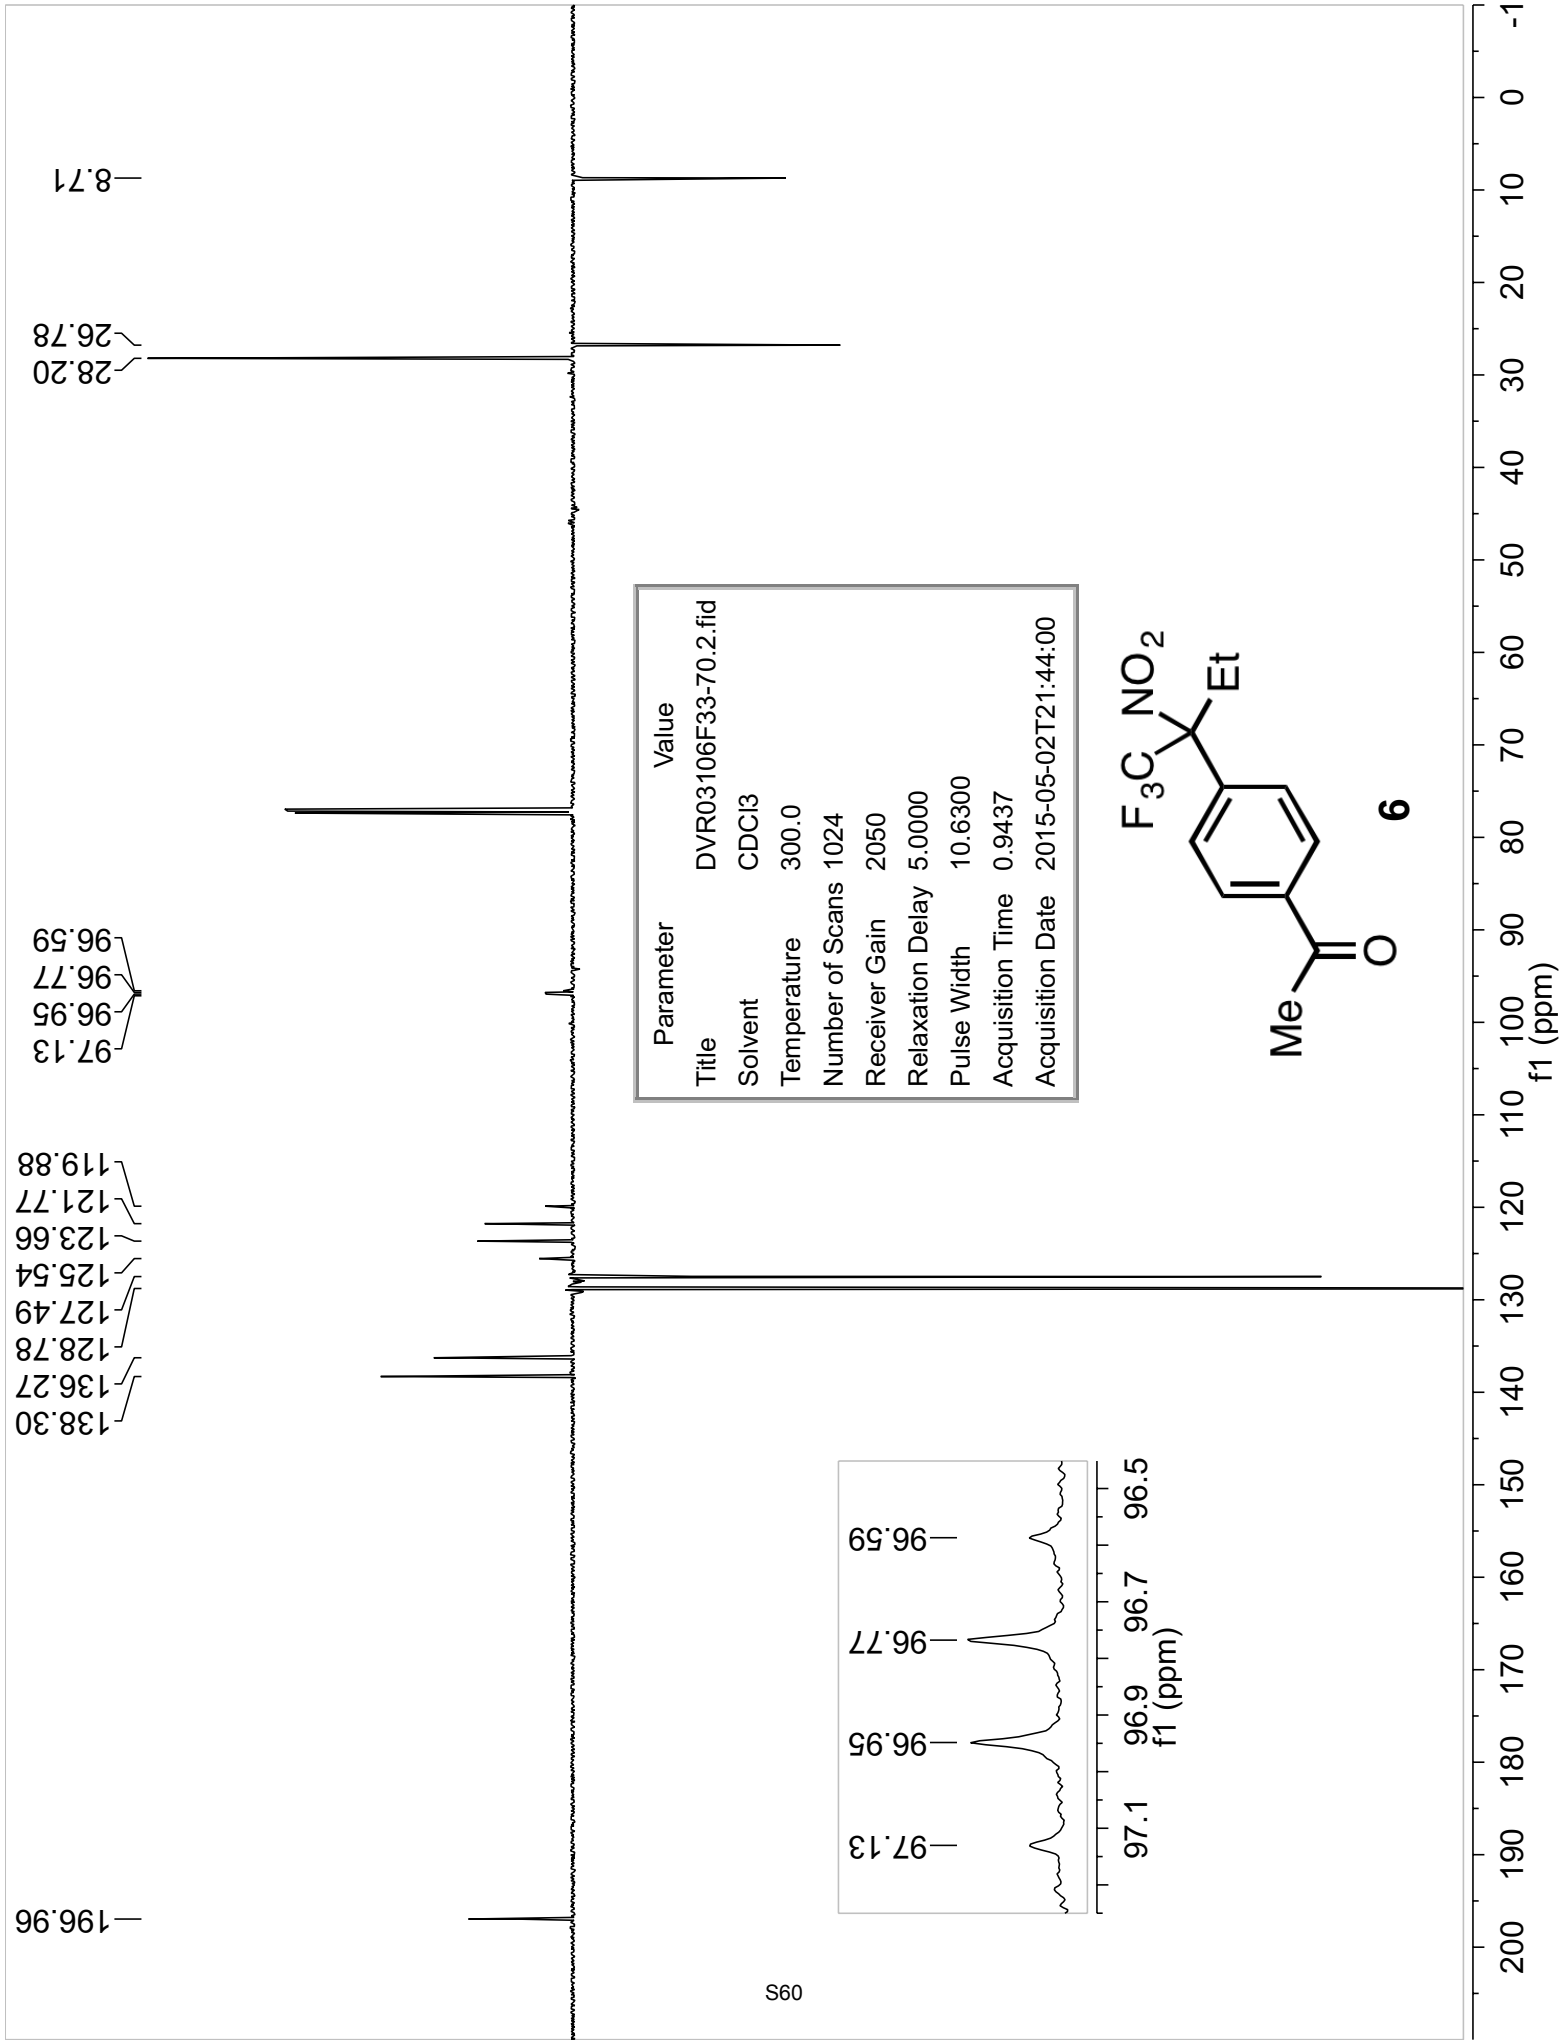



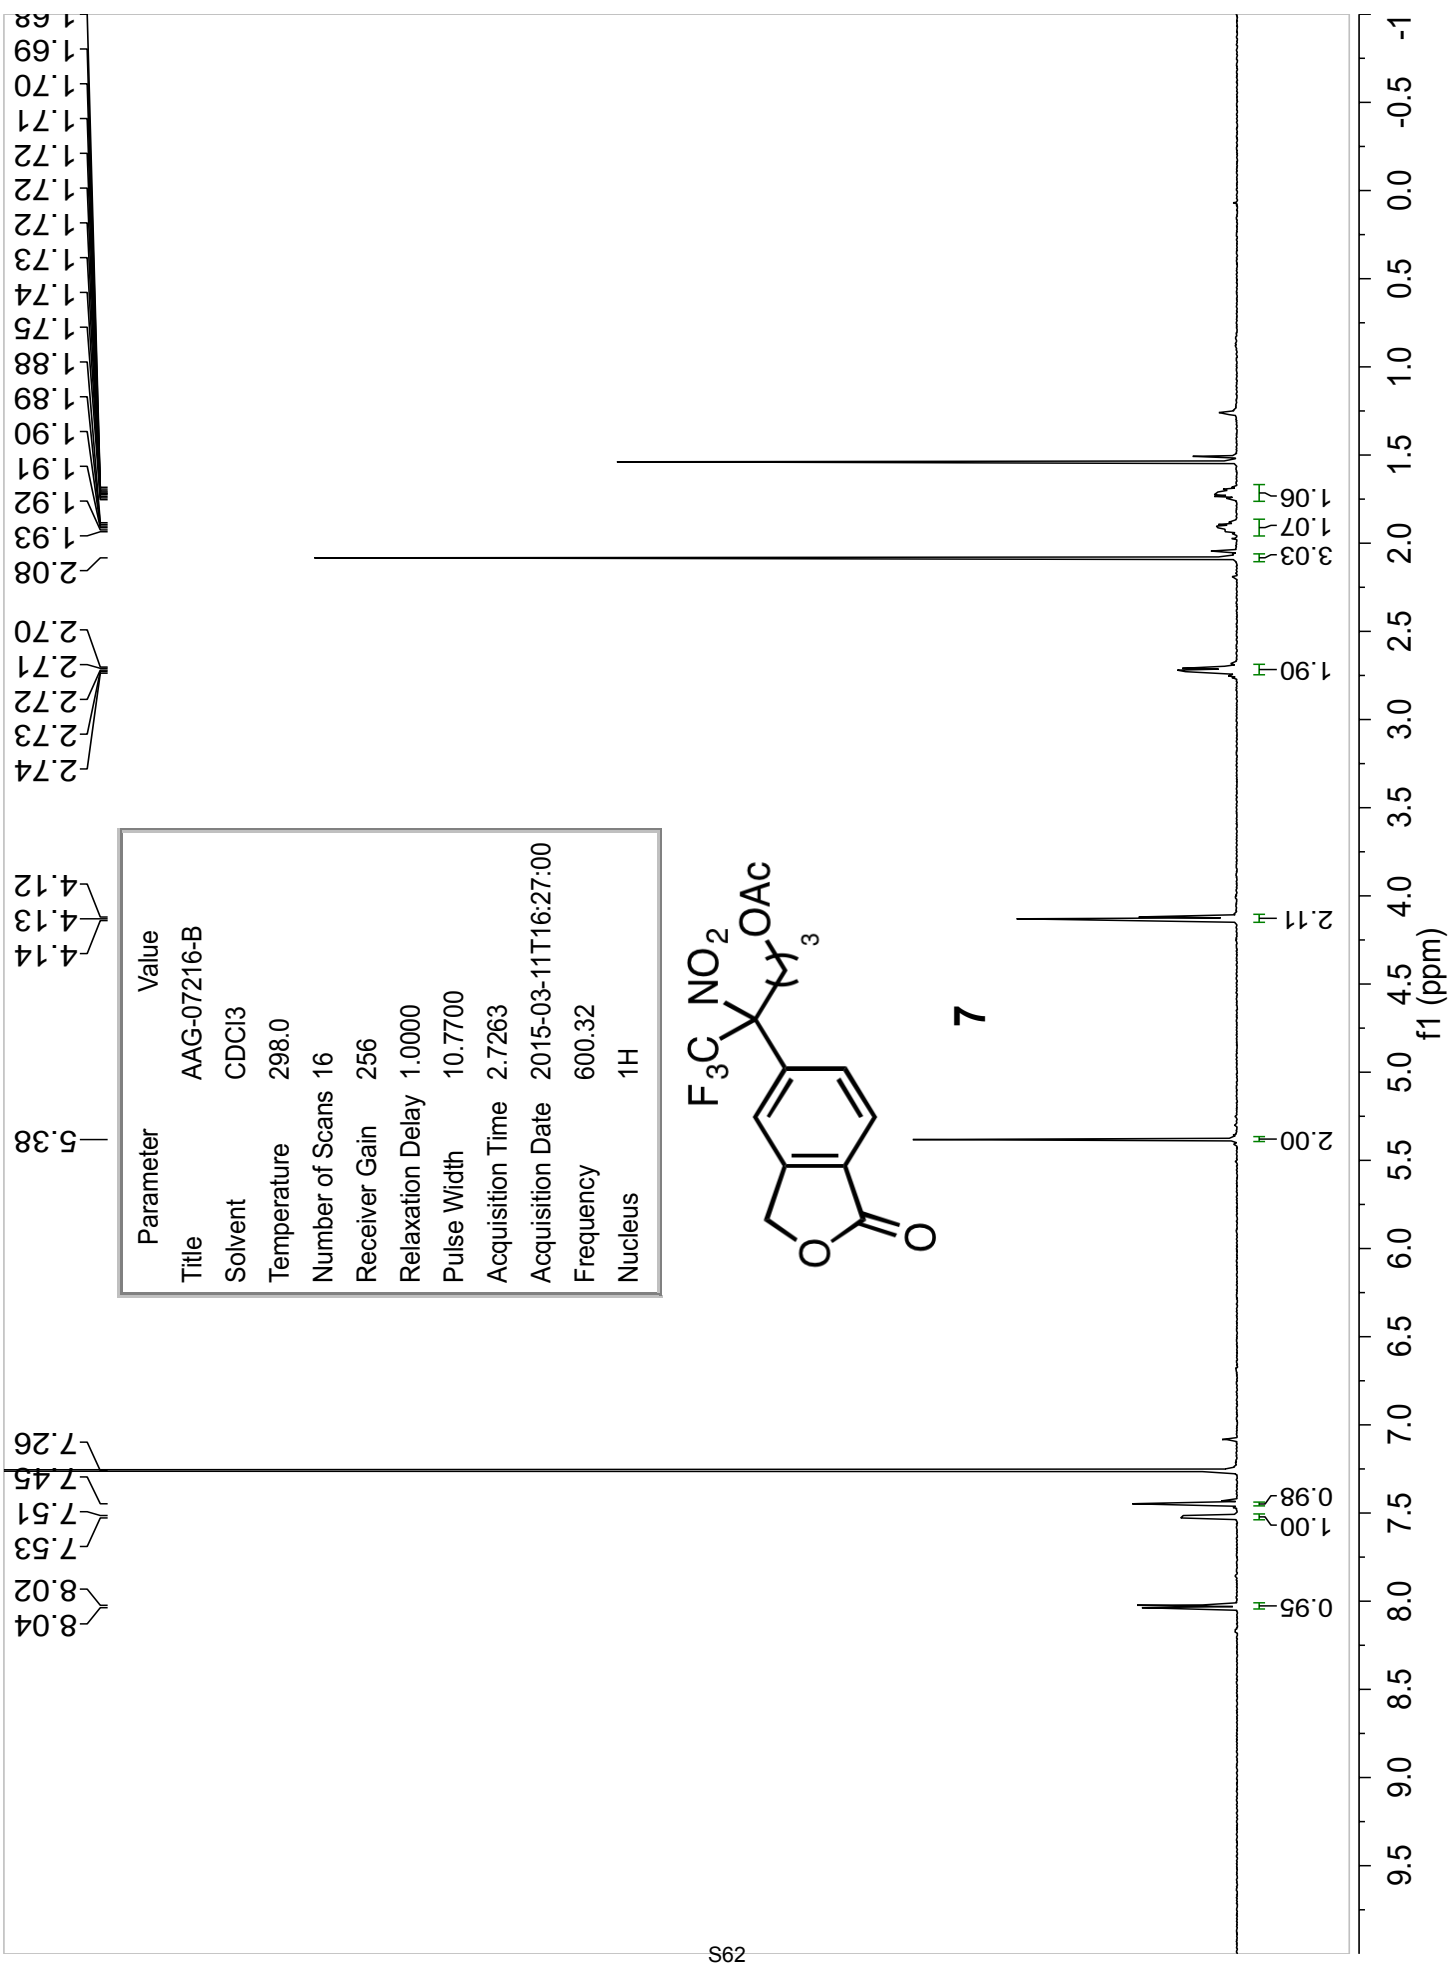

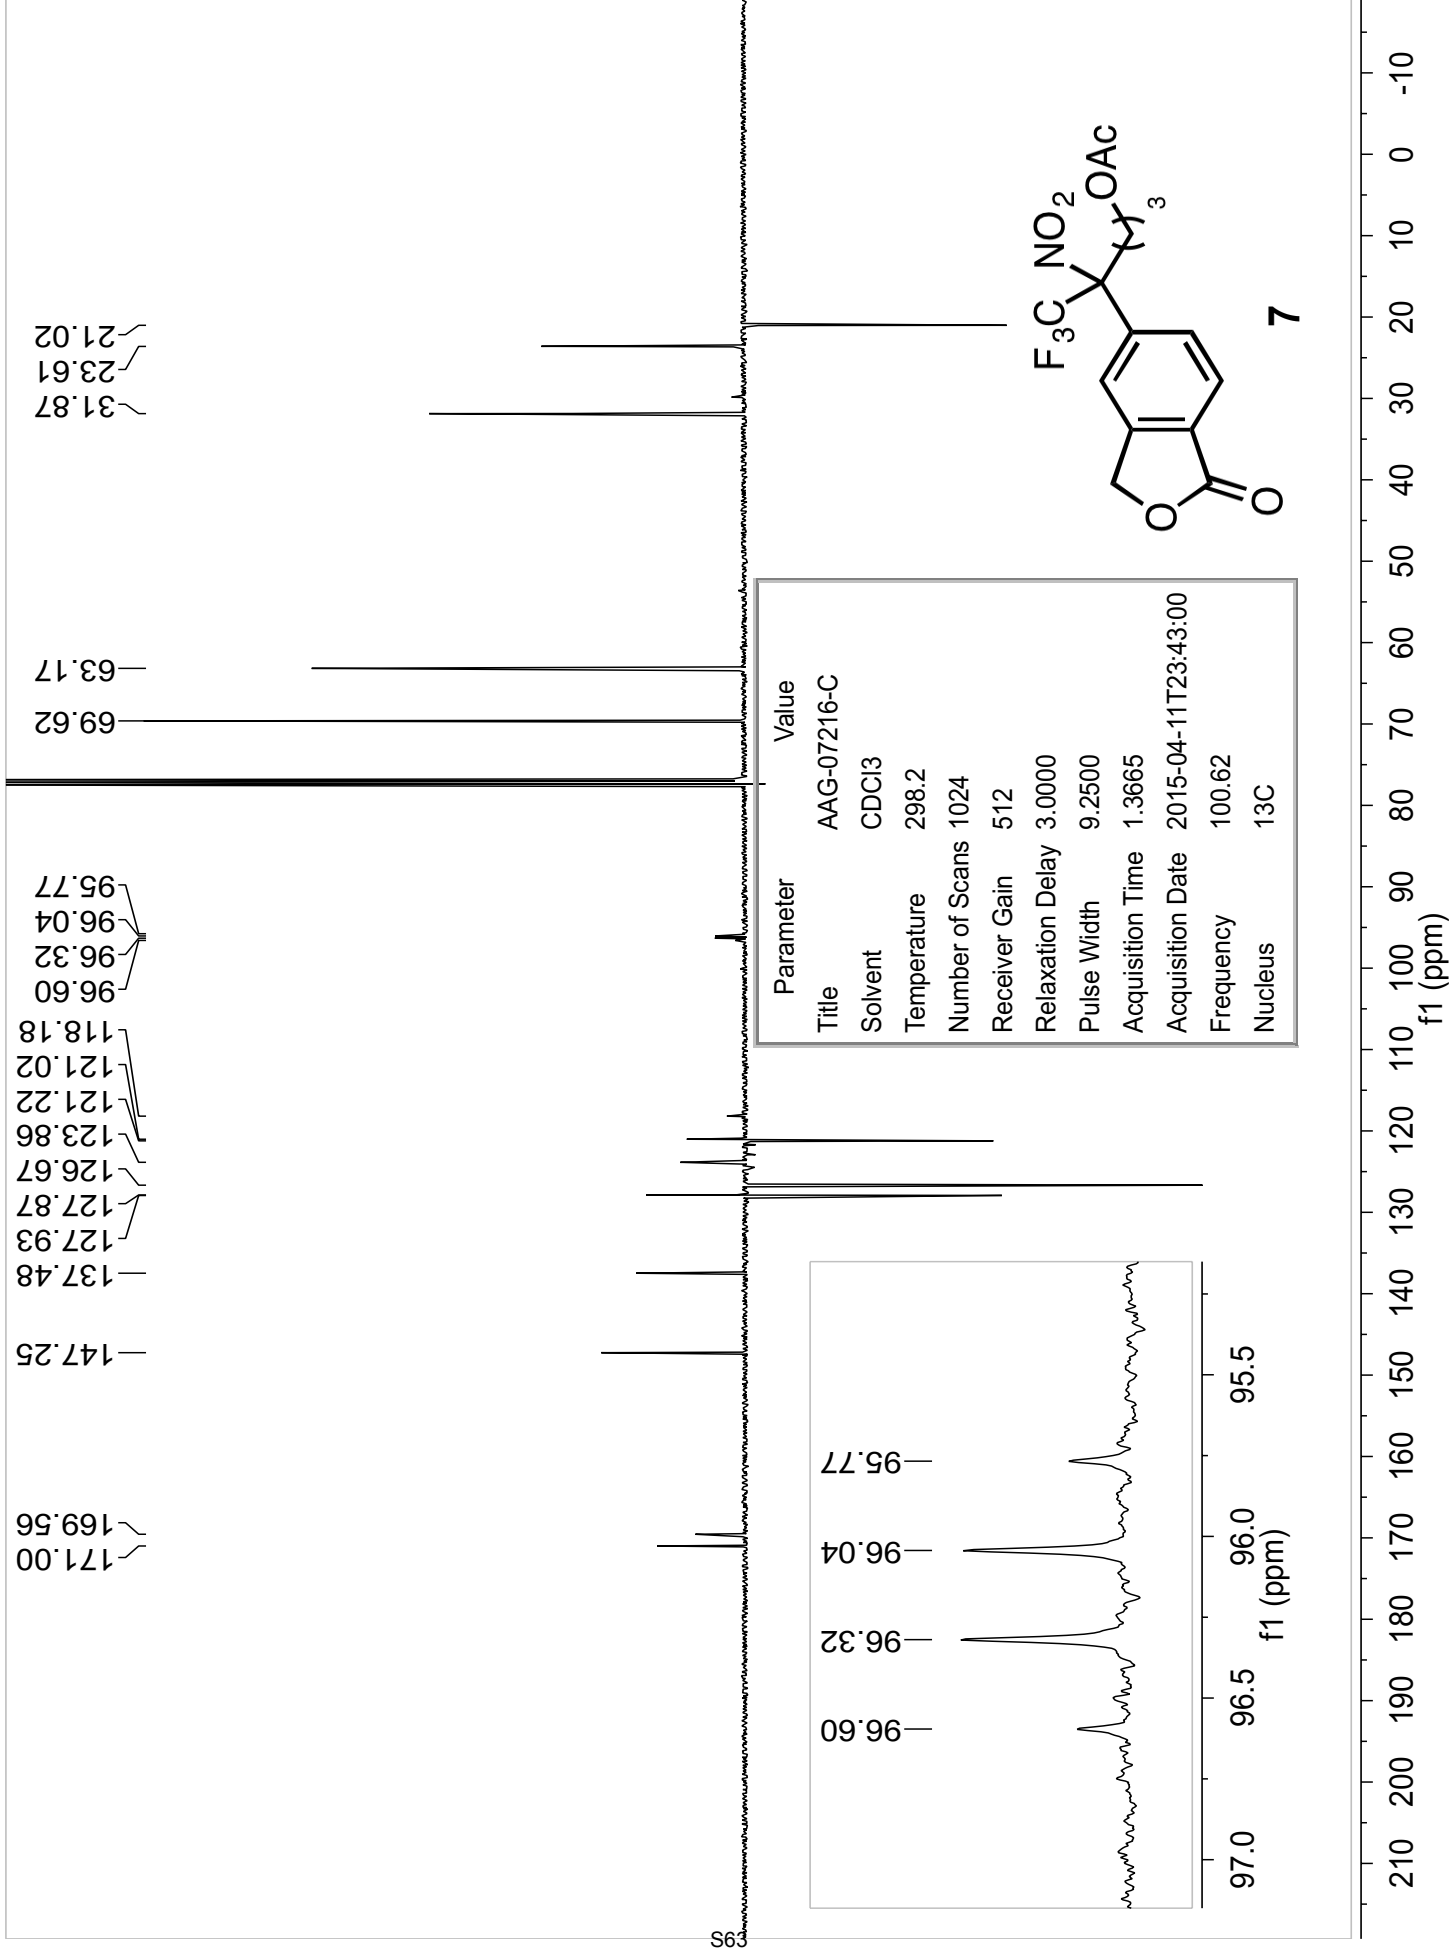

| Parameter        | Value               |
|------------------|---------------------|
| Title            | AAG-07216-B         |
| Solvent          | CDCl3               |
| Temperature      | 298.0               |
| Number of Scans  | 16                  |
| Receiver Gain    | 362                 |
| Relaxation Delay | 3.0000              |
| Pulse Width      | 11.6200             |
| Acquisition Time | 0.4893              |
| Acquisition Date | 2015-03-11T16:30:00 |
| Frequency        | 564.81              |
| Nucleus          | 19F                 |

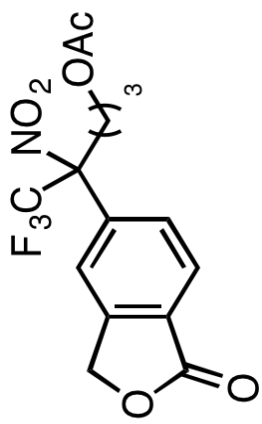

7

68.51

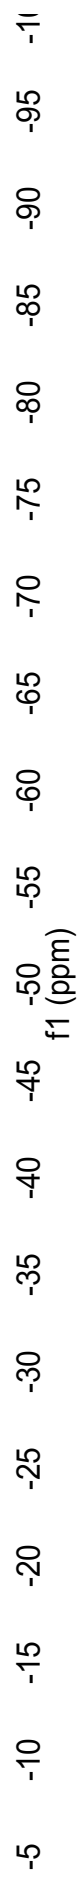



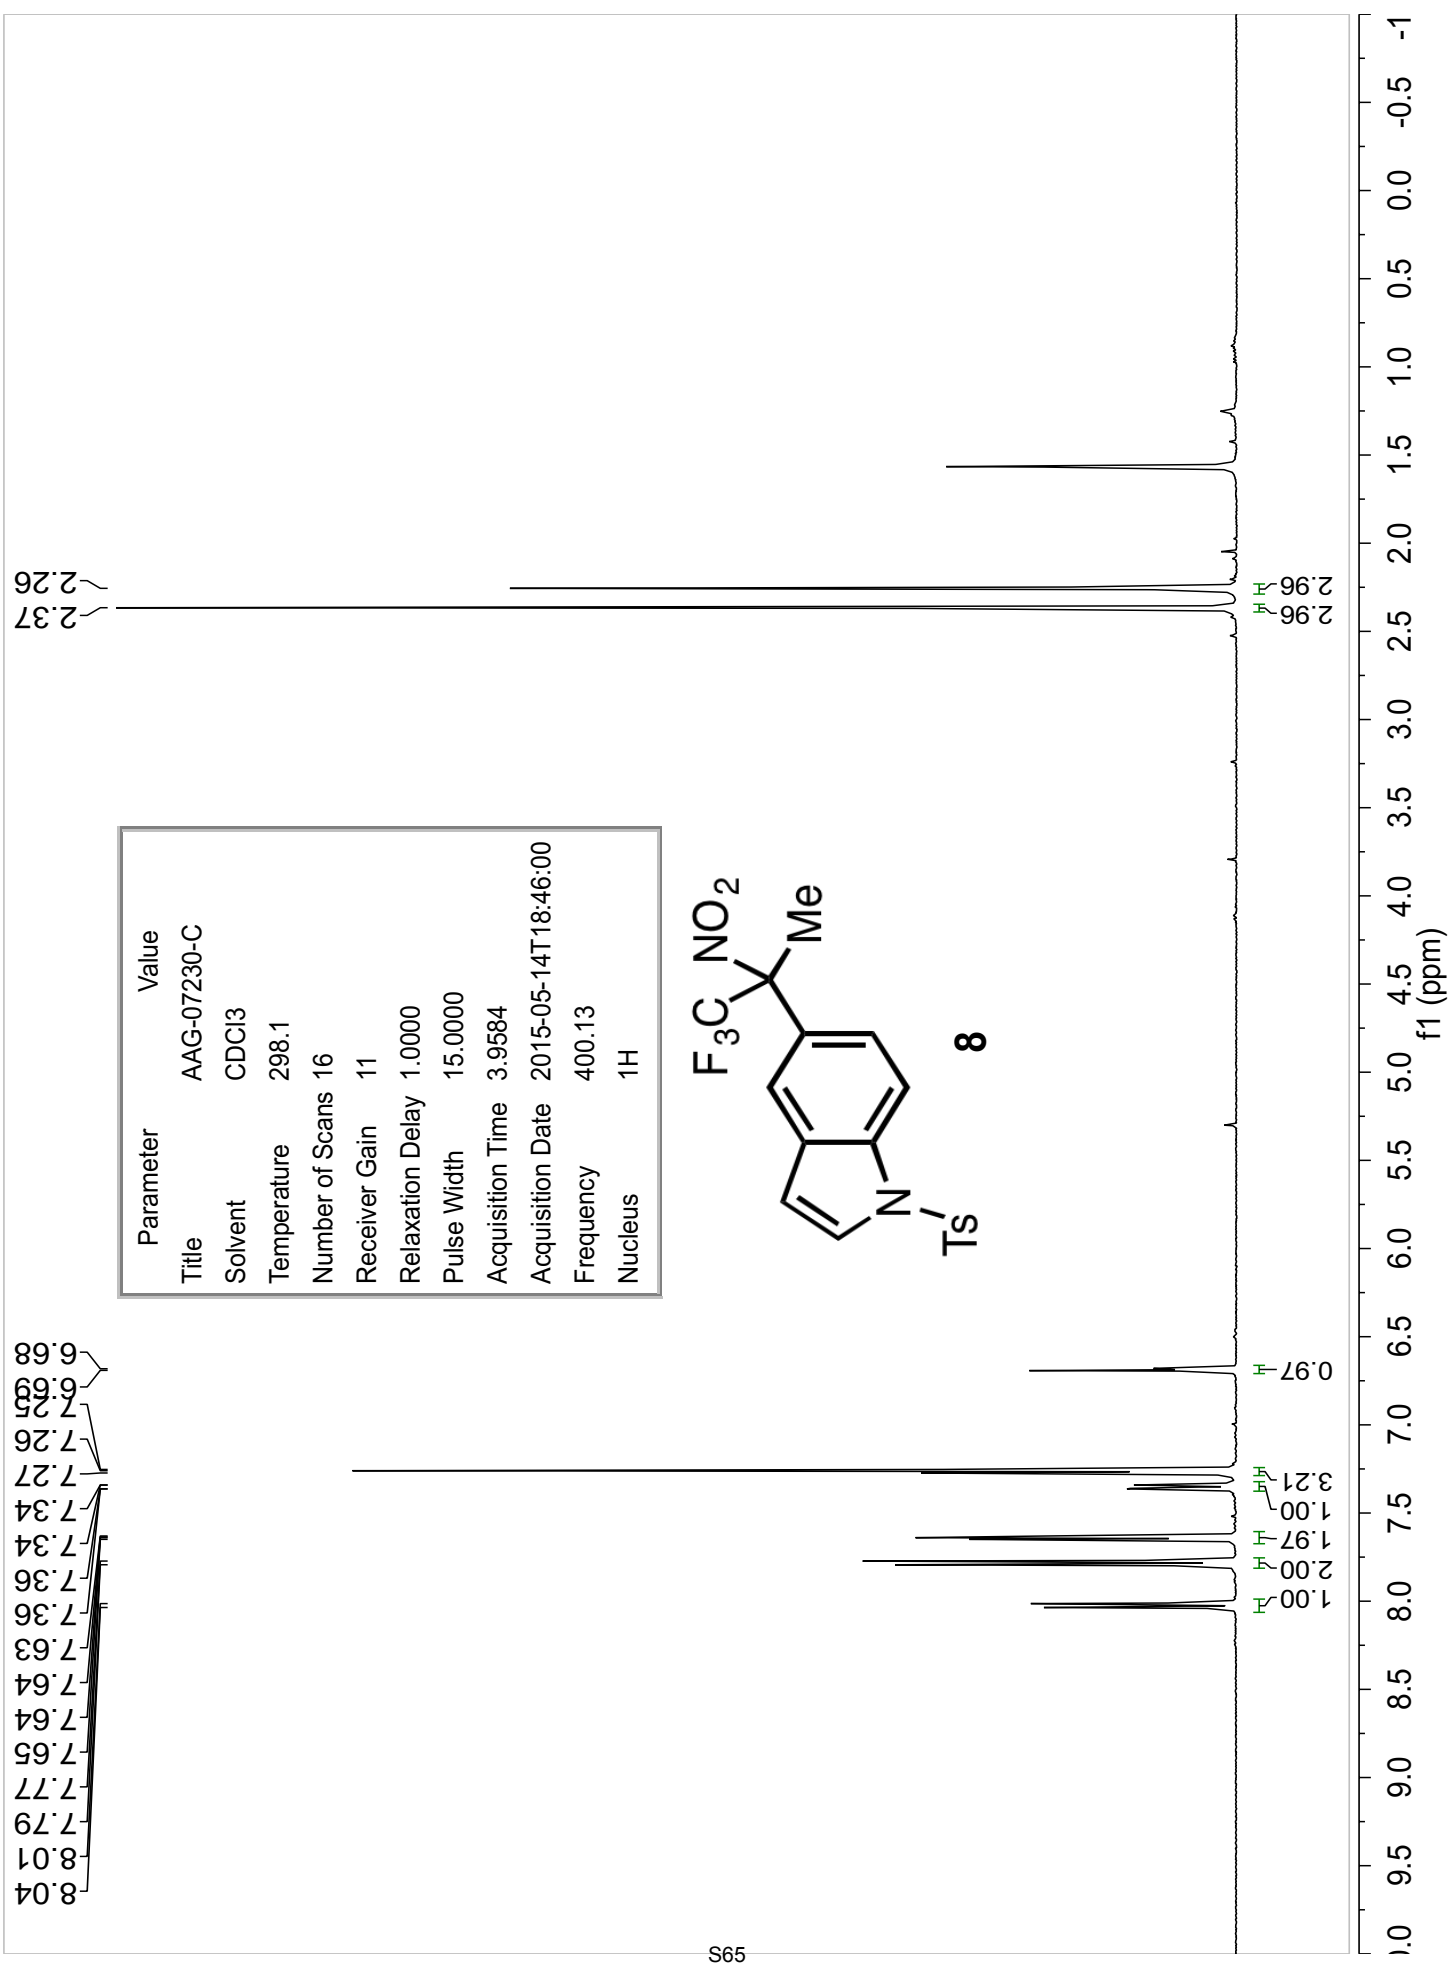

| Parameter        | Value               |
|------------------|---------------------|
| Title            | AAG-07230-C         |
| Solvent          | CDCl3               |
| Temperature      | 298.1               |
| Number of Scans  | 16                  |
| Receiver Gain    | 11                  |
| Relaxation Delay | 1.0000              |
| Pulse Width      | 15.0000             |
| Acquisition Time | 3.9584              |
| Acquisition Date | 2015-05-14T18:46:00 |
| Frequency        | 400.13              |
| Nucleus          | 1H                  |

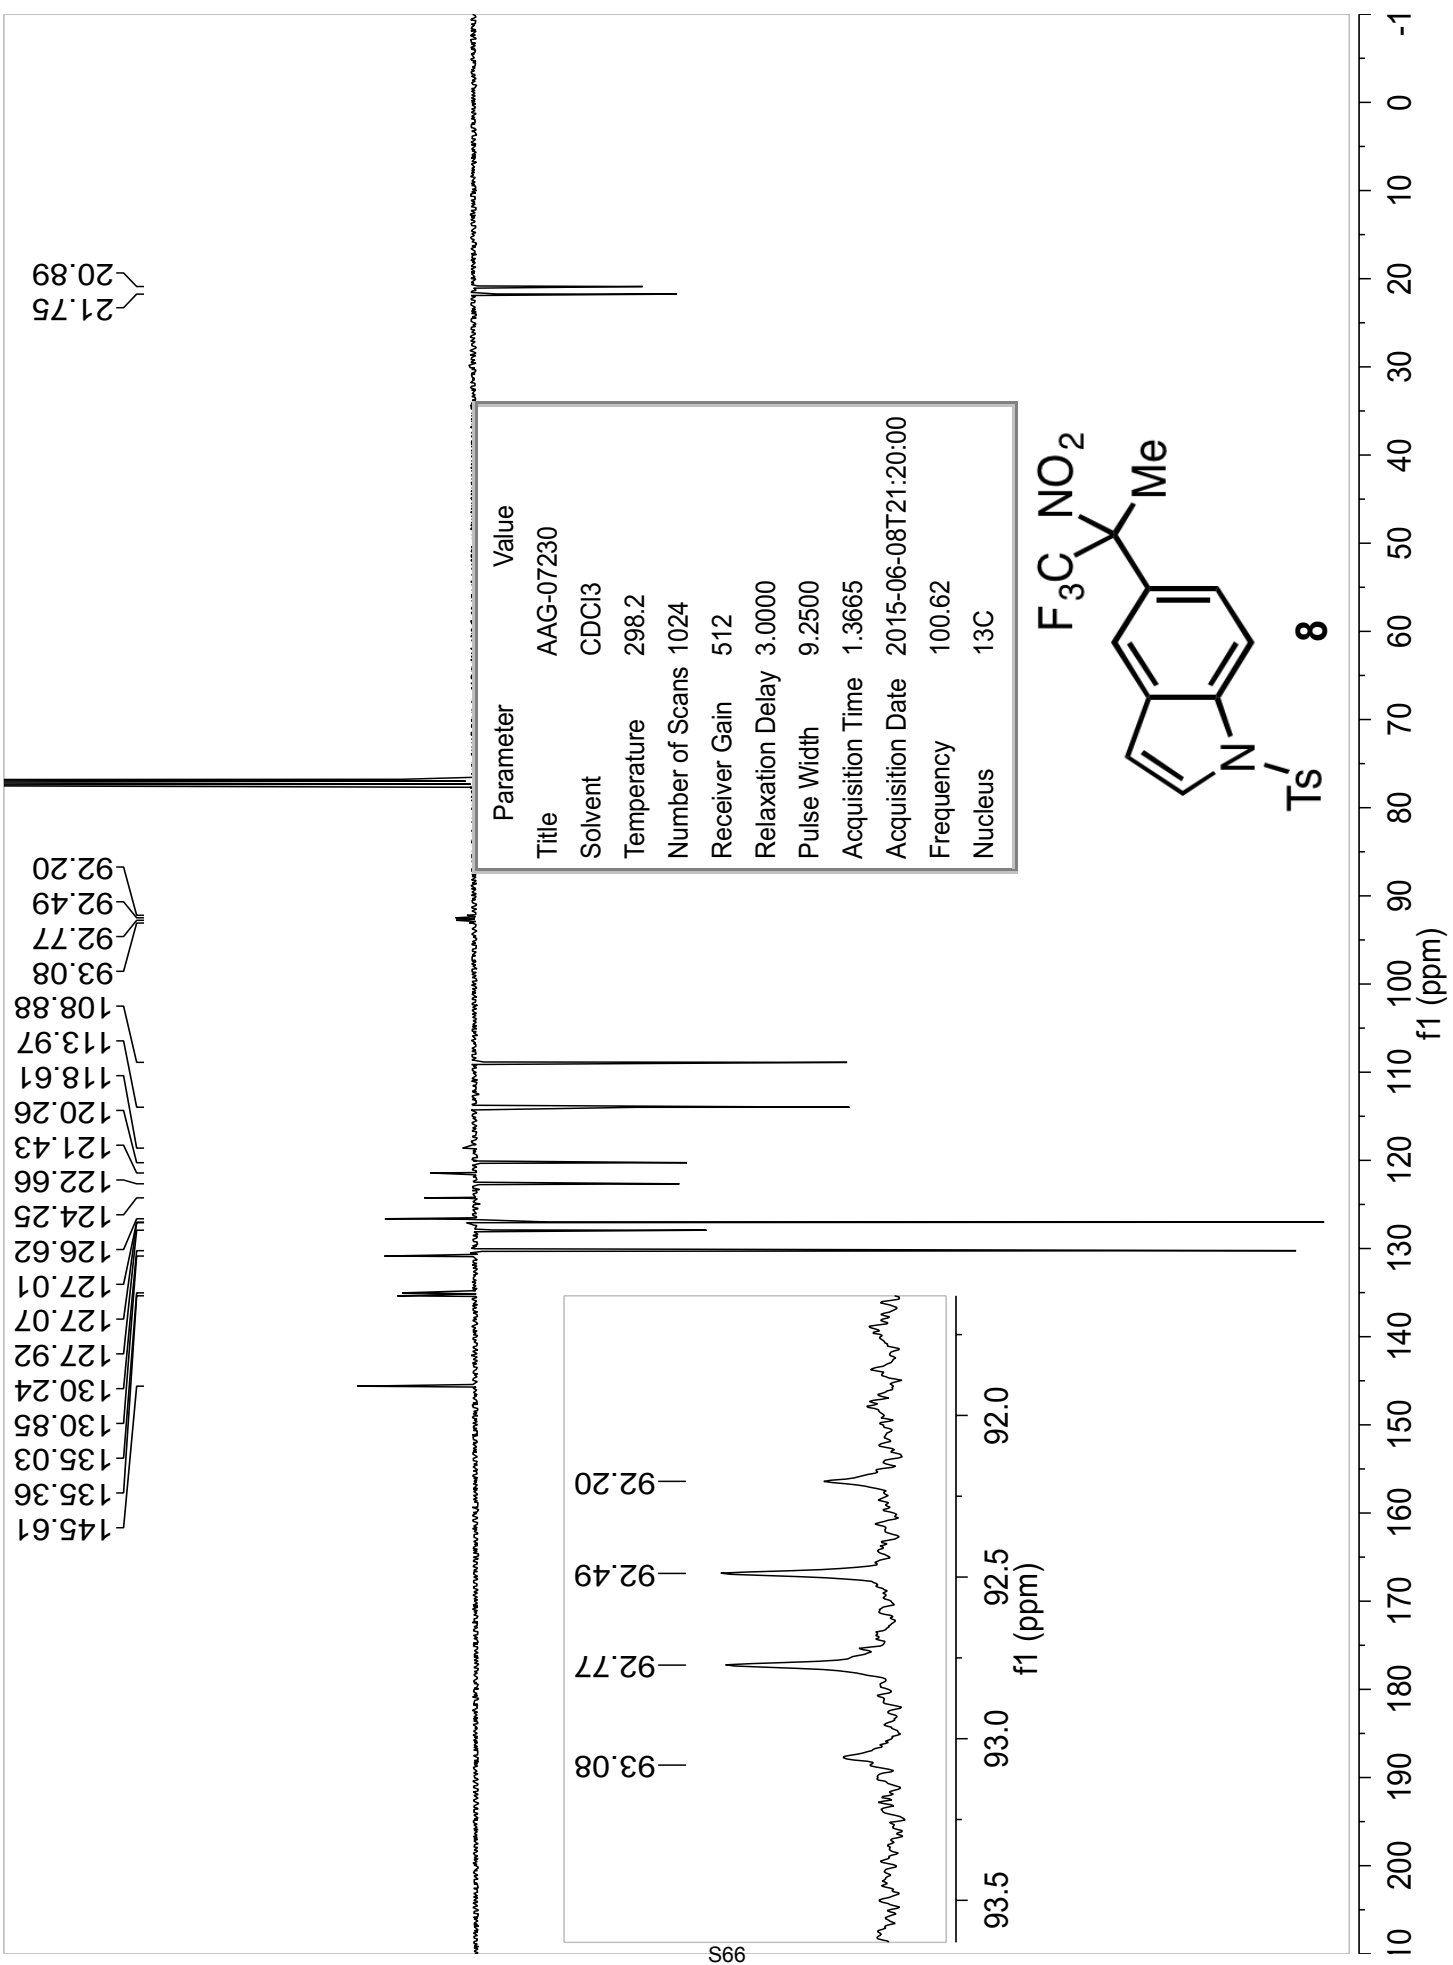

| Parameter        | Value               |
|------------------|---------------------|
| Title            | AAG-07230-C         |
| Solvent          | CDCl <sub>3</sub>   |
| Temperature      | 298.2               |
| Number of Scans  | 16                  |
| Receiver Gain    | 1626                |
| Relaxation Delay | 2.0000              |
| Pulse Width      | 15.0300             |
| Acquisition Time | 0.8717              |
| Acquisition Date | 2015-05-14T18:48:00 |
| Frequency        | 376.46              |
| Nucleus          | <sup>19</sup> F     |

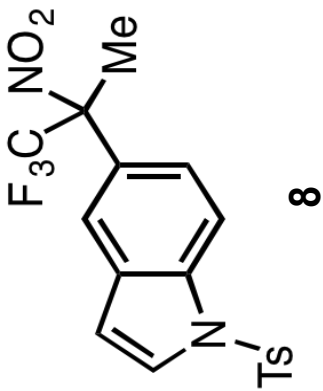

-72.33

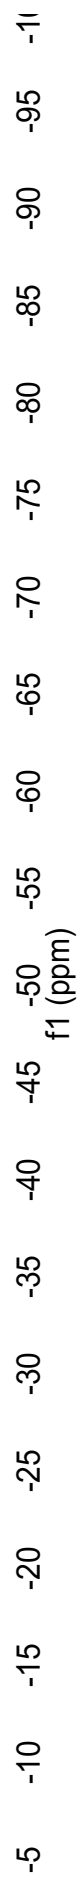

3.00  
2.97  
2.70  
2.69  
2.68  
2.68  
2.65  
2.65  
2.64  
2.64  
2.63  
2.62  
2.62  
2.61  
2.60  
2.59  
2.59  
2.58  
2.57  
2.56  
2.56  
2.55  
2.54  
2.53  
2.53  
2.52  
2.51  
2.41  
2.40  
2.39  
1.54

| Parameter        | Value               |
|------------------|---------------------|
| Title            | AAG-07254-B         |
| Solvent          | CDCl3               |
| Temperature      | 300.0               |
| Number of Scans  | 16                  |
| Receiver Gain    | 256                 |
| Relaxation Delay | 1.0000              |
| Pulse Width      | 10.7700             |
| Acquisition Time | 2.7263              |
| Acquisition Date | 2015-04-17T16:19:00 |
| Frequency        | 600.32              |
| Nucleus          | 1H                  |

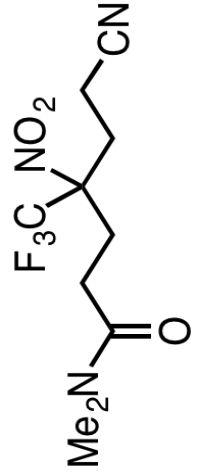

9

5.85  
6.16  
2.00

1.0 9.5 9.0 8.5 8.0 7.5 7.0 6.5 6.0 5.5 5.0 4.5 4.0 3.5 3.0 2.5 2.0 1.5 1.0 0.5 0.0 -0.5 -1

f1 (ppm)

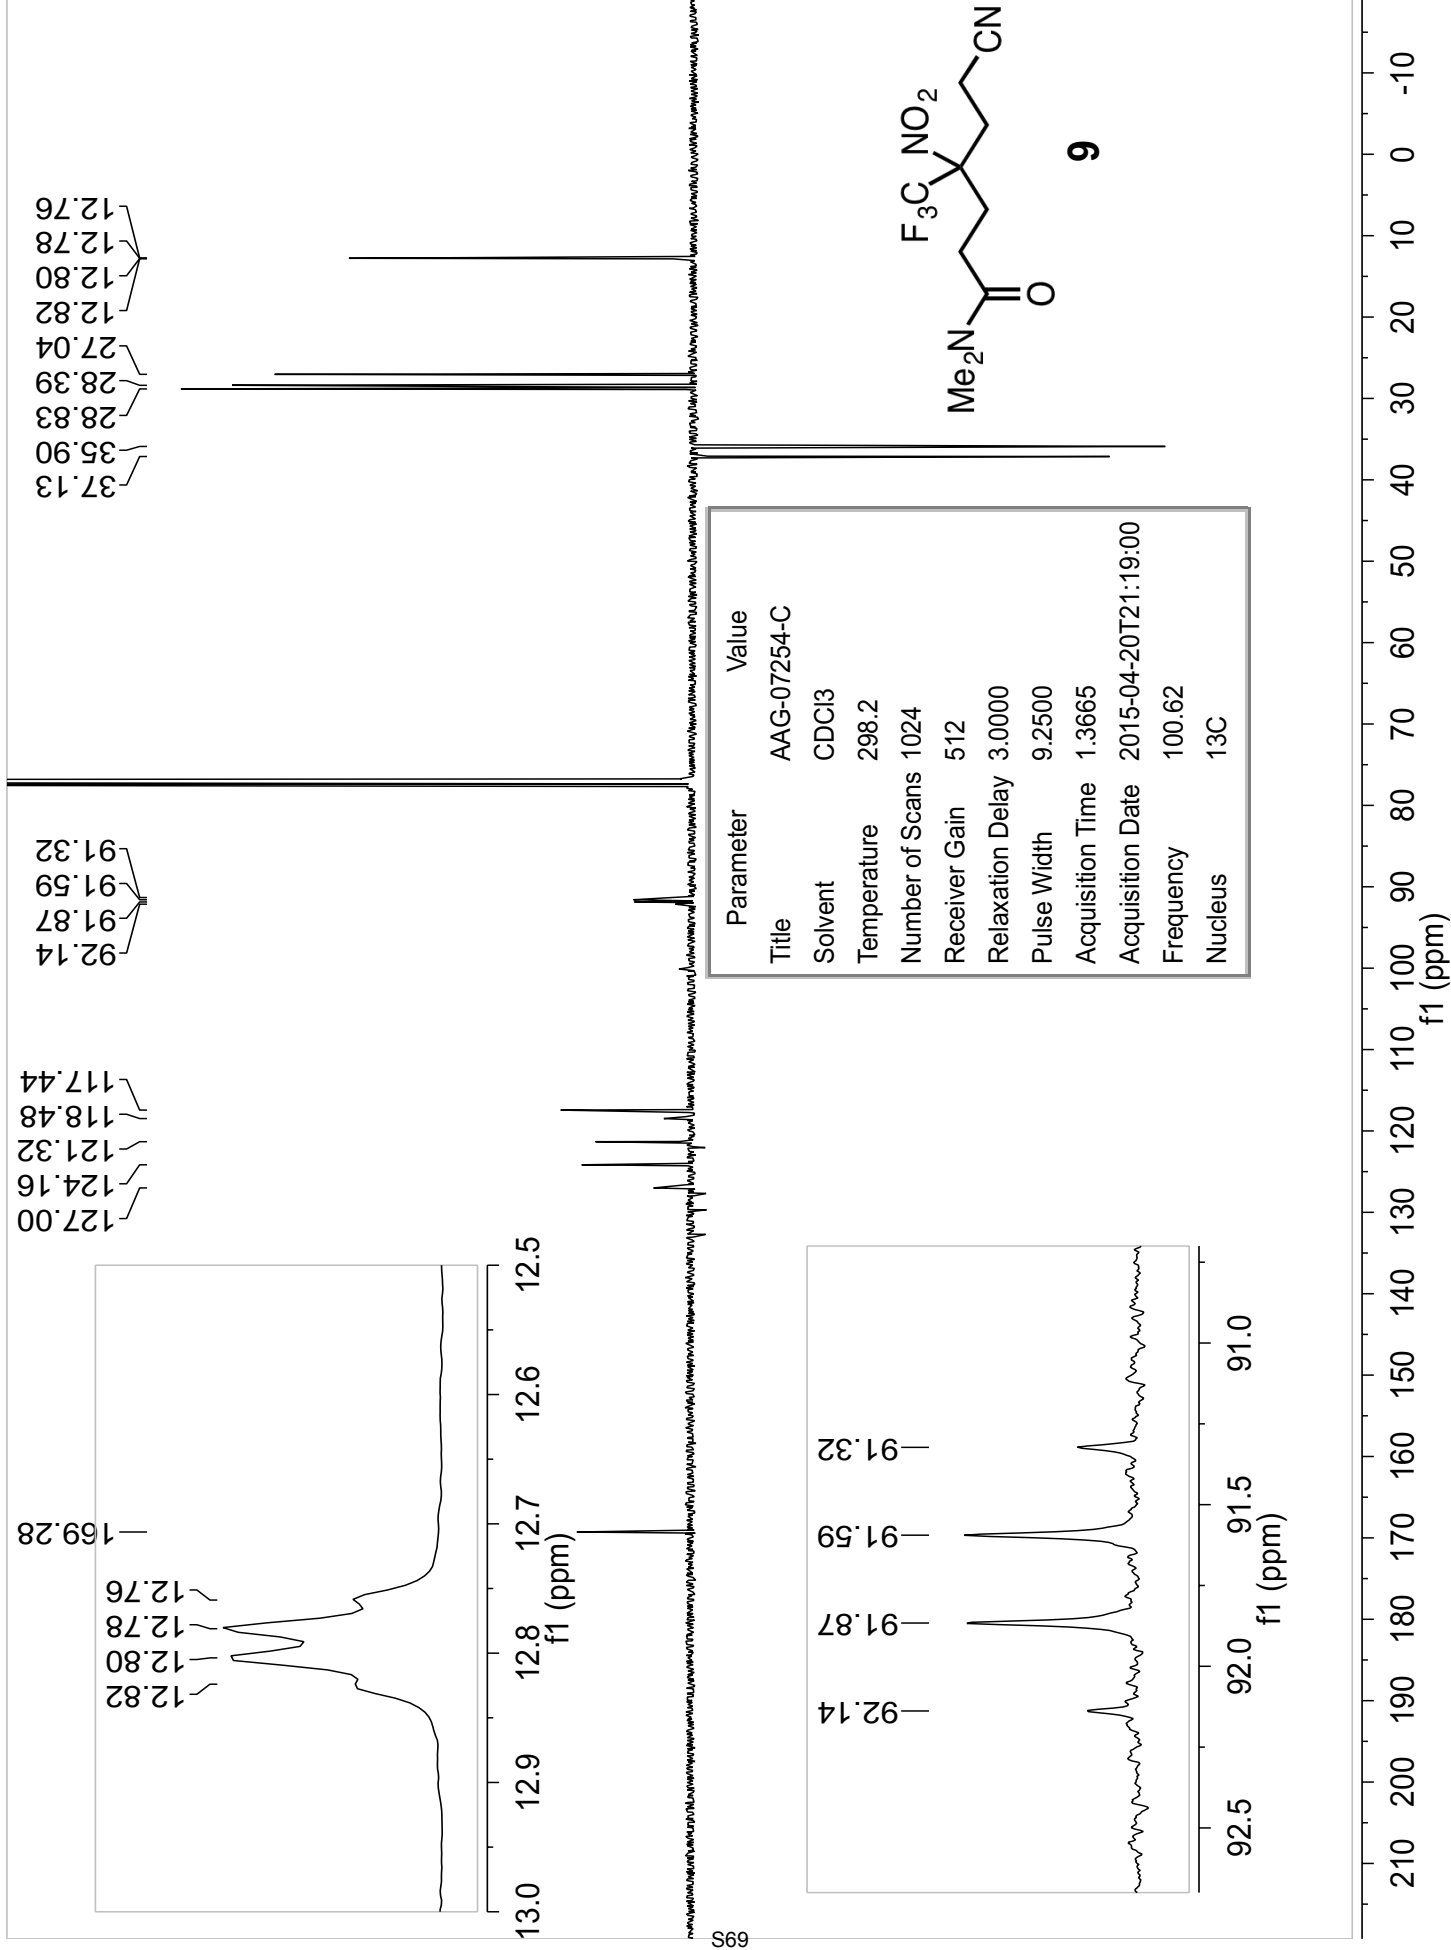

-70.57

| Parameter        | Value               |
|------------------|---------------------|
| Title            | AAG-07254-B         |
| Solvent          | CDCl <sub>3</sub>   |
| Temperature      | 300.0               |
| Number of Scans  | 16                  |
| Receiver Gain    | 362                 |
| Relaxation Delay | 3.0000              |
| Pulse Width      | 11.6200             |
| Acquisition Time | 0.4893              |
| Acquisition Date | 2015-04-16T18:22:00 |
| Frequency        | 564.81              |
| Nucleus          | <sup>19</sup> F     |

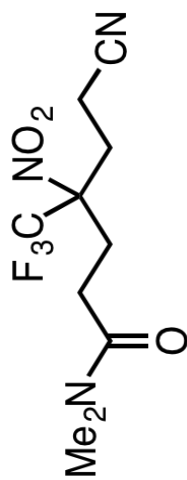

**9**



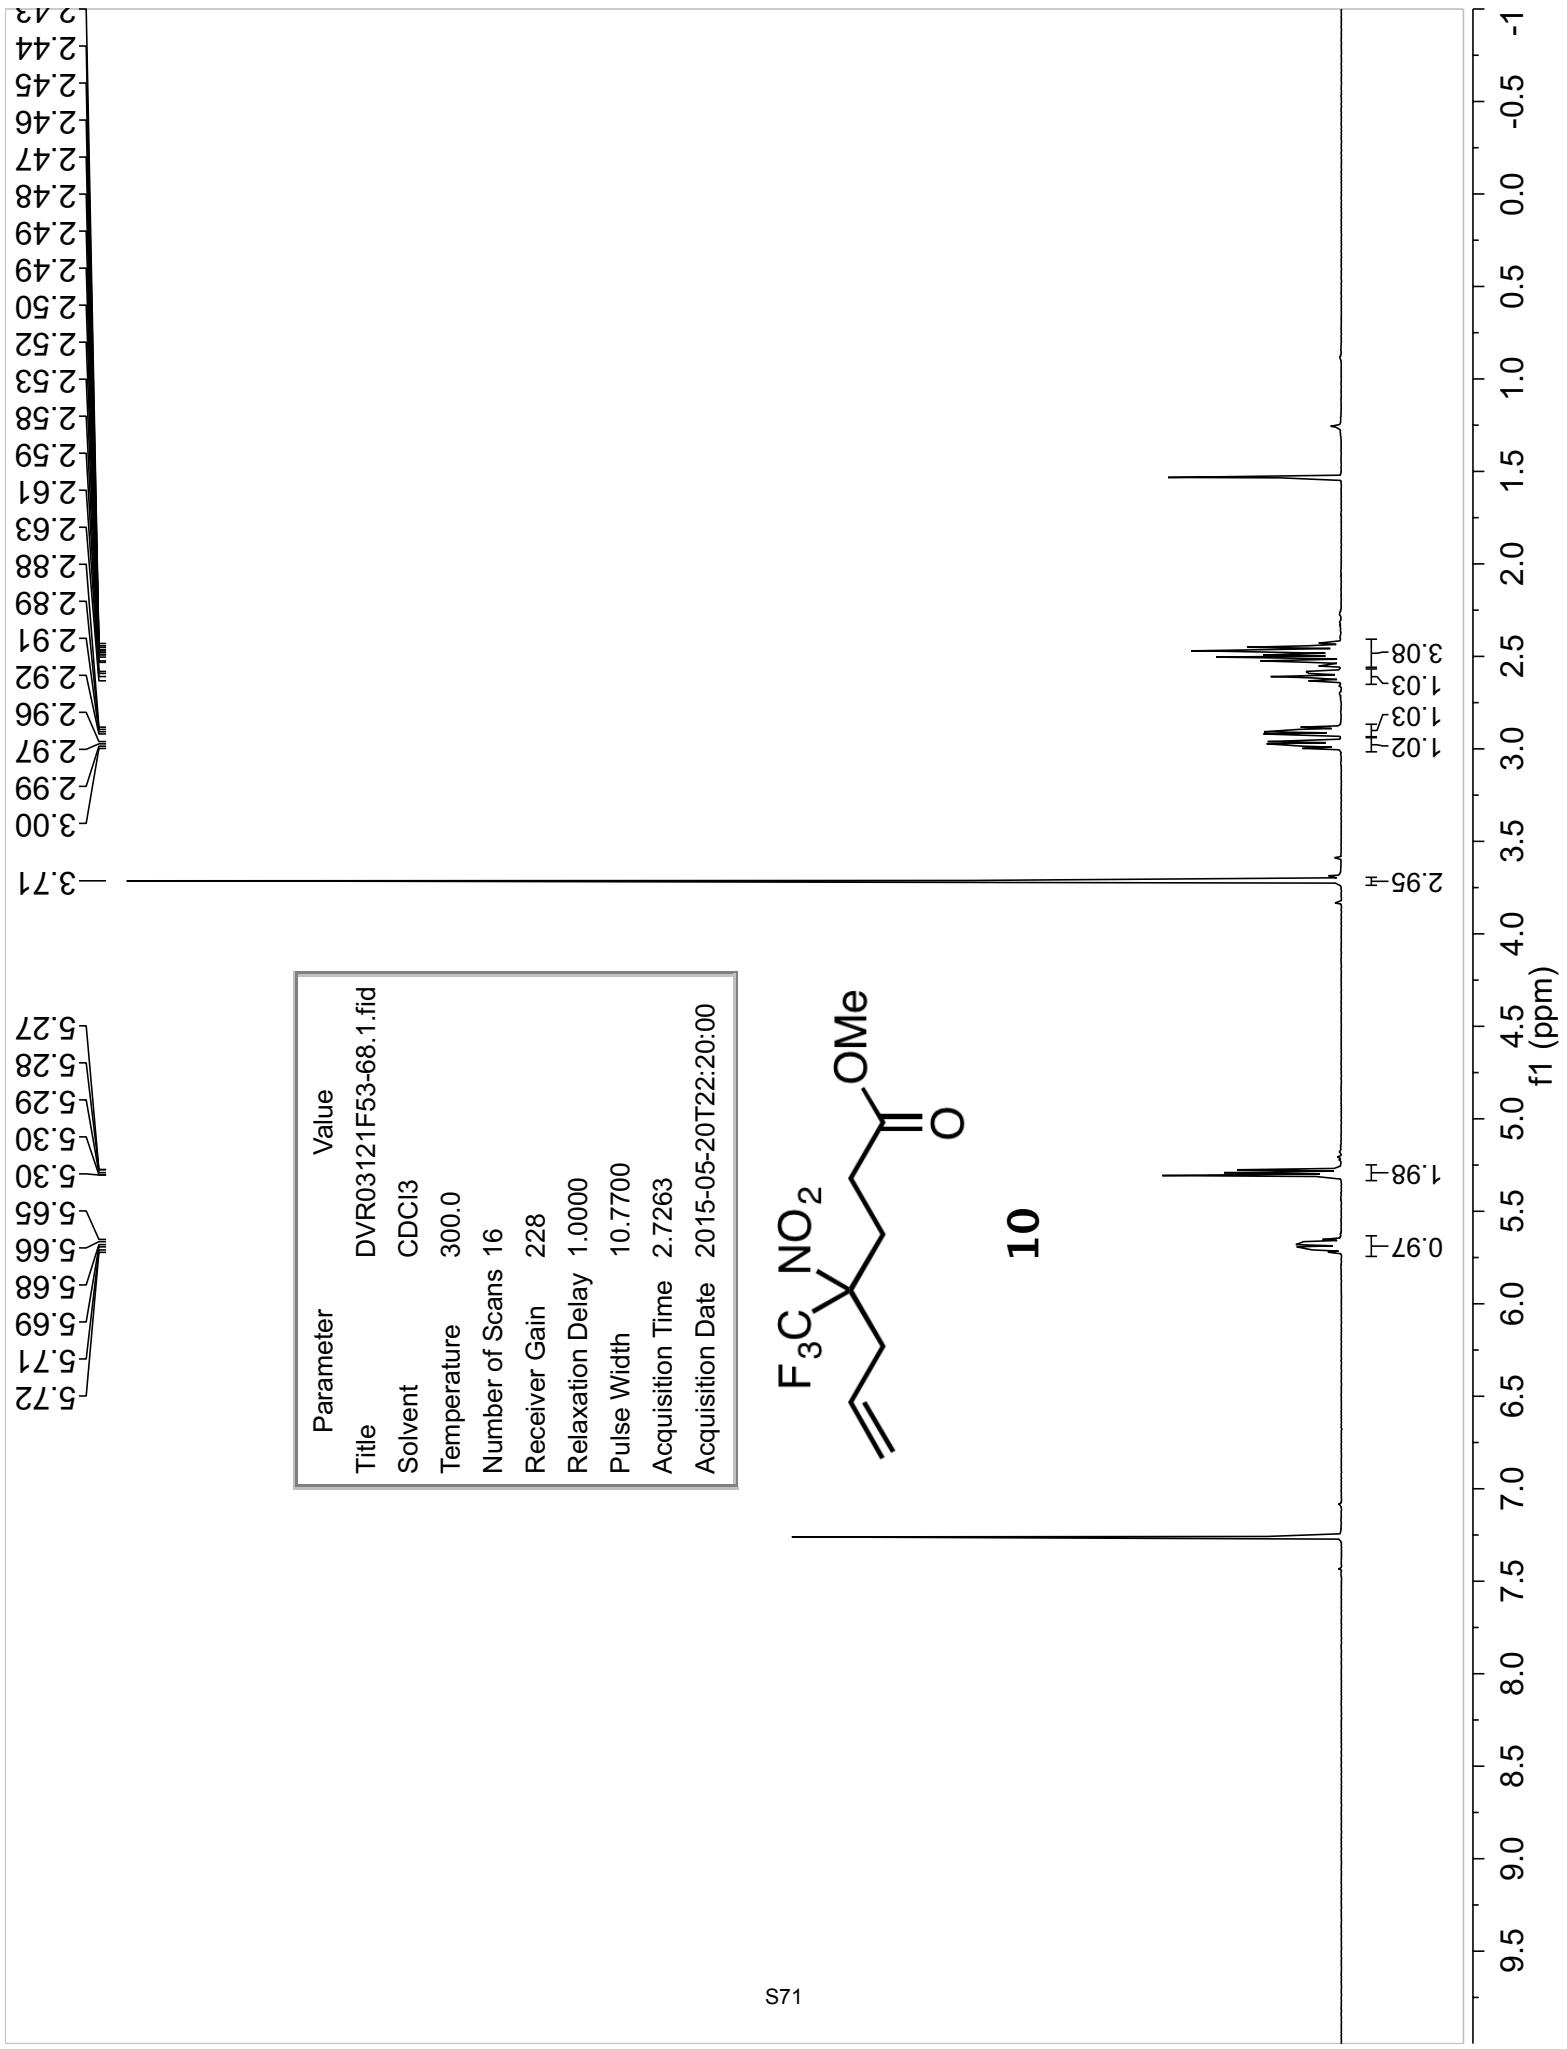

| Parameter        | Value                |
|------------------|----------------------|
| Title            | DVR03121F53-68.1.fid |
| Solvent          | CDCl3                |
| Temperature      | 300.0                |
| Number of Scans  | 16                   |
| Receiver Gain    | 228                  |
| Relaxation Delay | 1.0000               |
| Pulse Width      | 10.7700              |
| Acquisition Time | 2.7263               |
| Acquisition Date | 2015-05-20T22:20:00  |

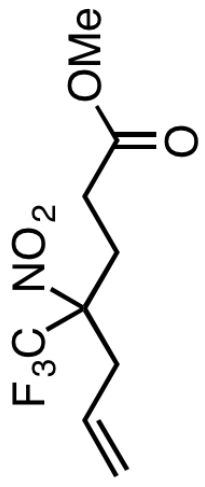

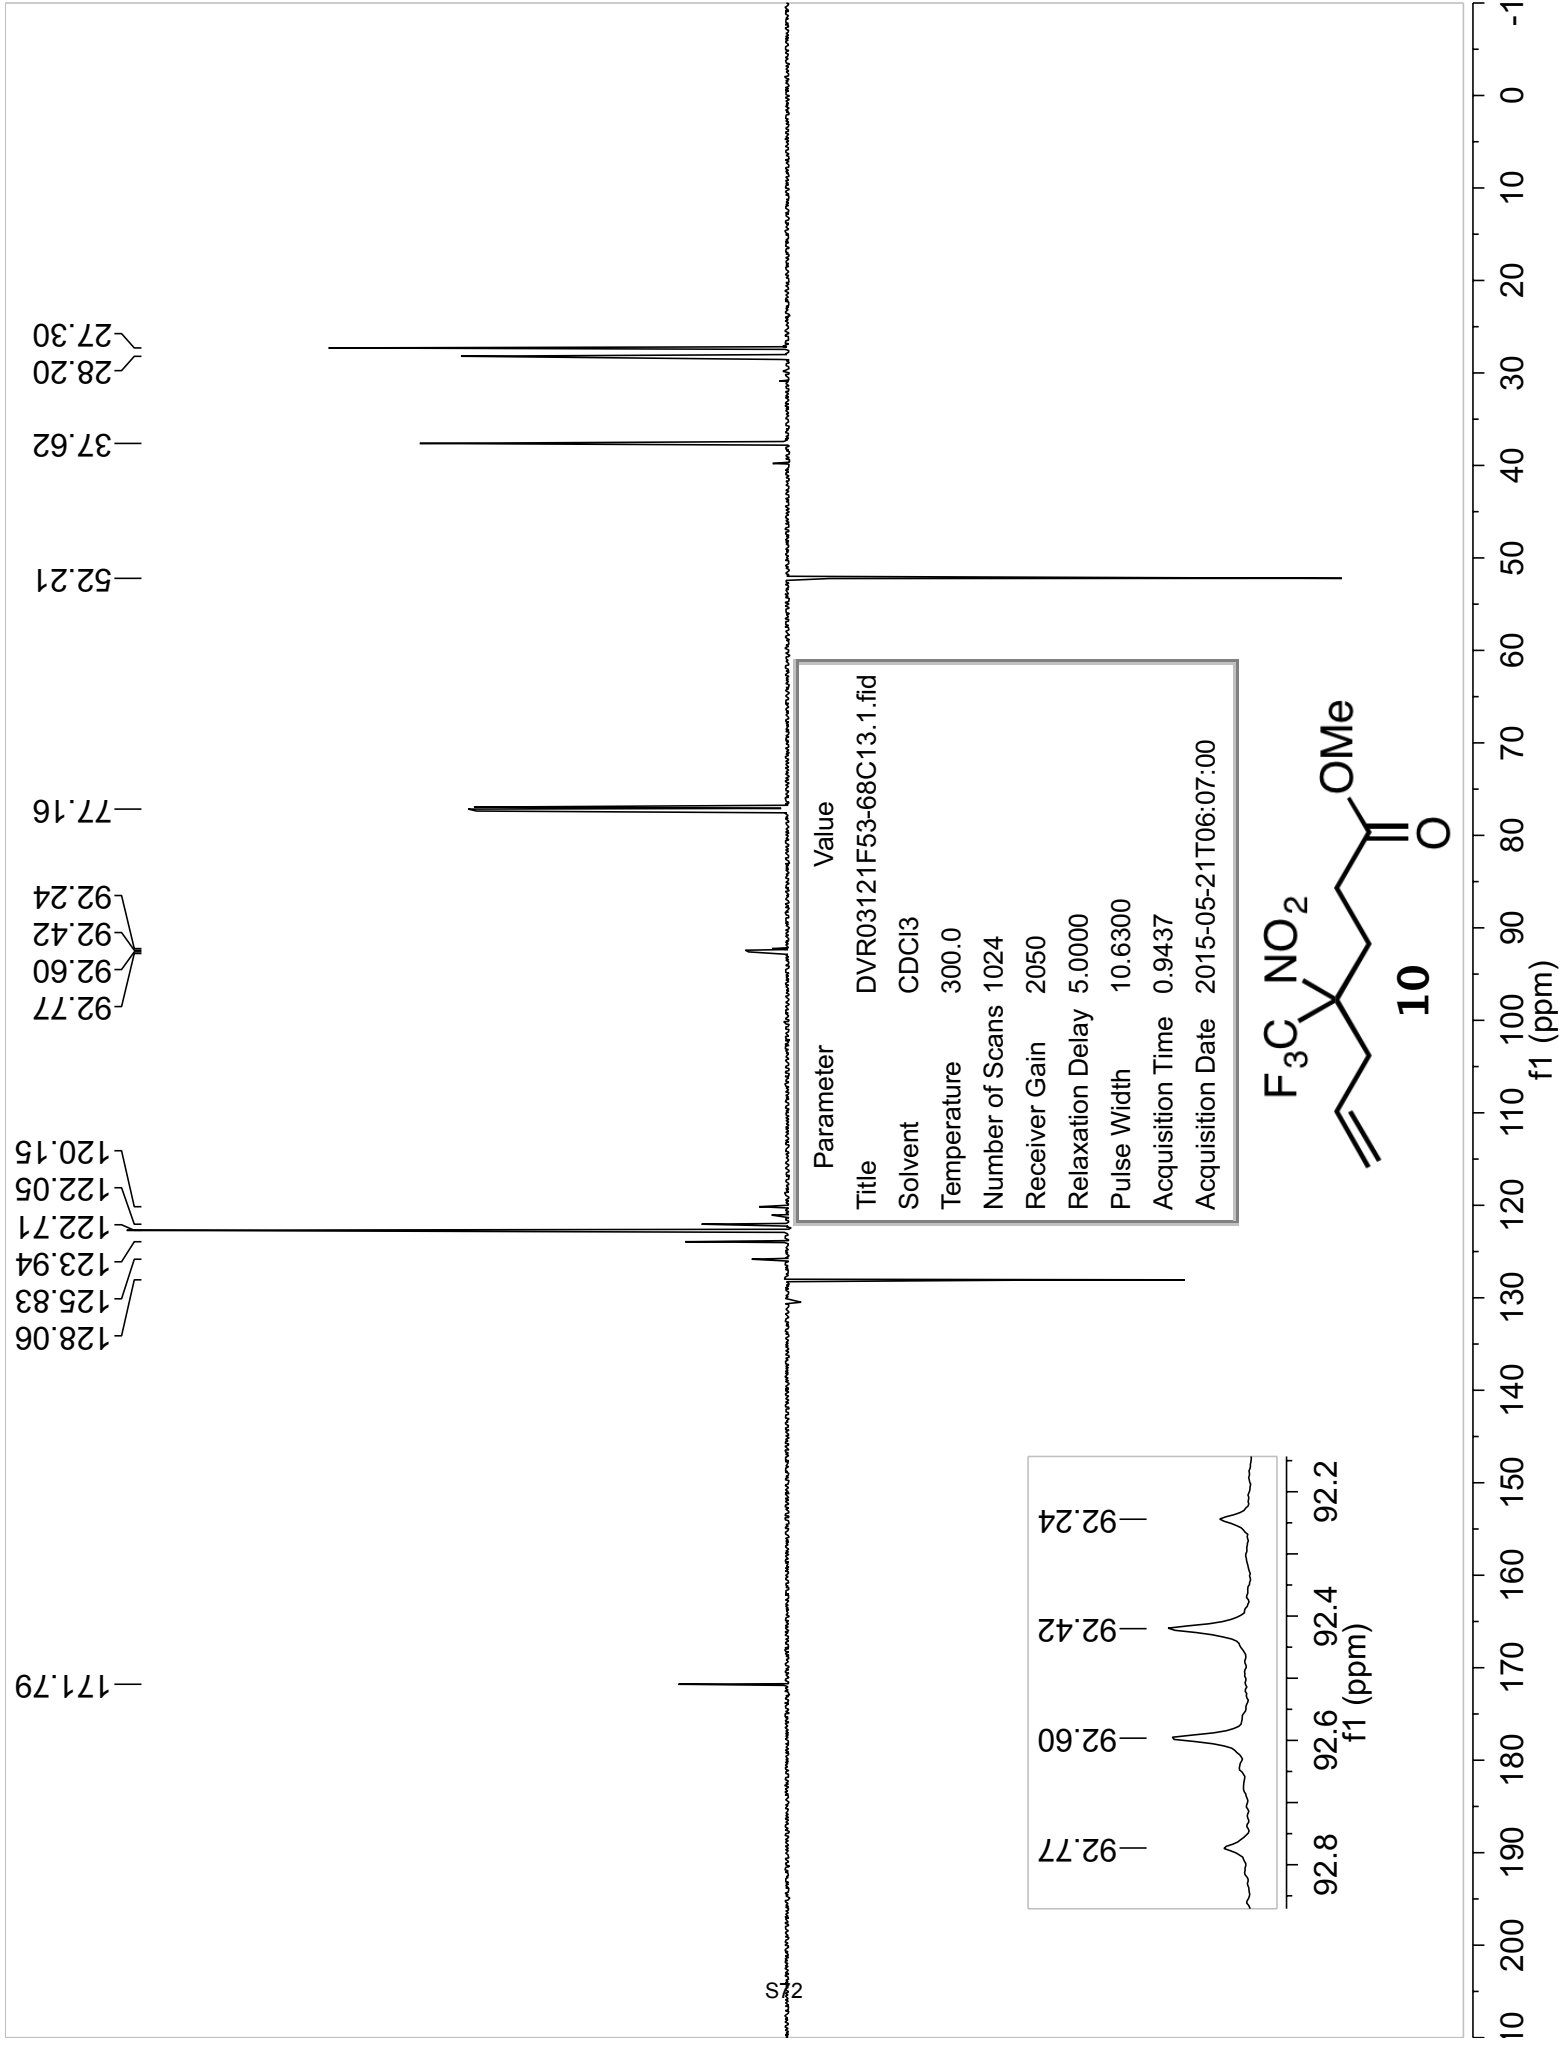



-71.06

| Parameter        | Value                |
|------------------|----------------------|
| Title            | DVR03121F53-68.2.fid |
| Solvent          | CDCl3                |
| Temperature      | 300.0                |
| Number of Scans  | 16                   |
| Receiver Gain    | 362                  |
| Relaxation Delay | 3.0000               |
| Pulse Width      | 11.6200              |
| Acquisition Time | 0.4893               |
| Acquisition Date | 2015-05-20T22:22:00  |

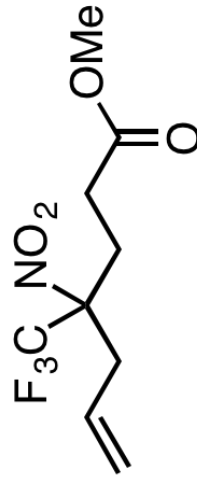

10

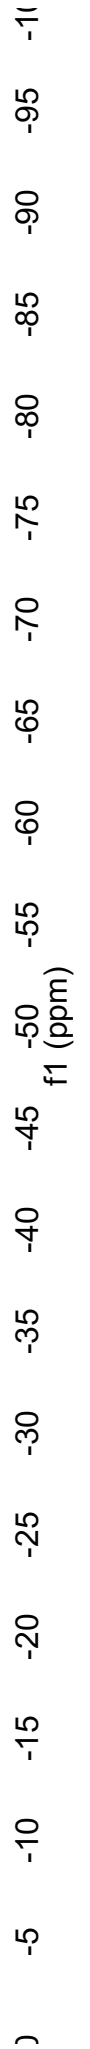

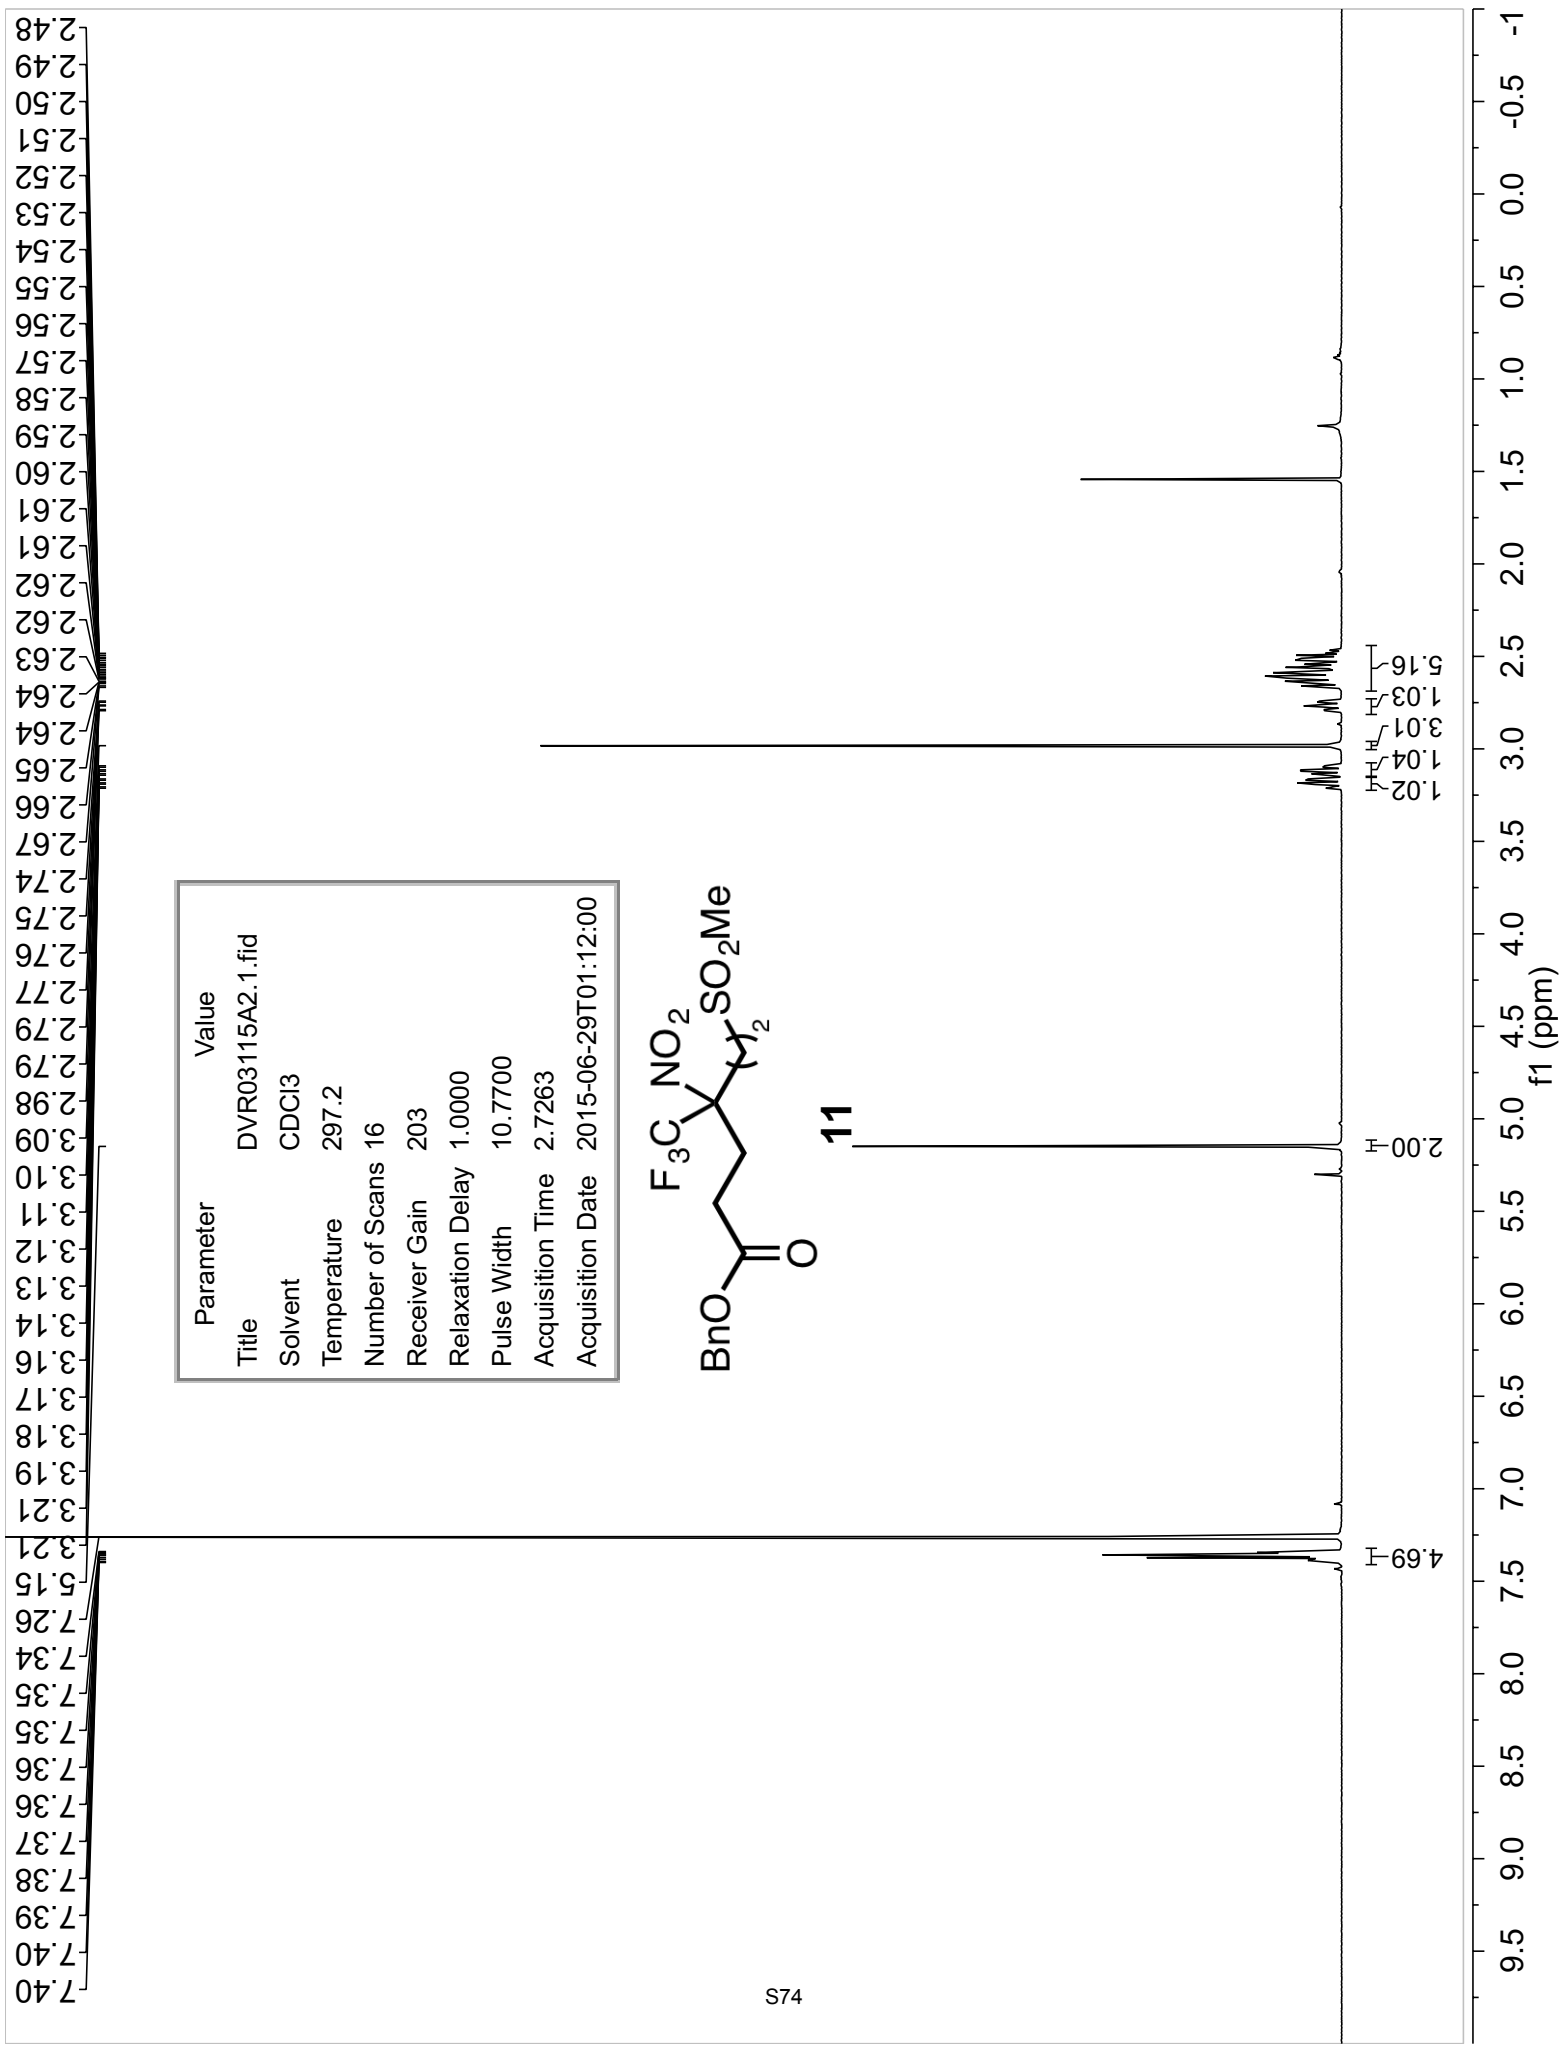

| Parameter        | Value               |
|------------------|---------------------|
| Title            | DVR03115A2.1.fid    |
| Solvent          | CDCl3               |
| Temperature      | 297.2               |
| Number of Scans  | 16                  |
| Receiver Gain    | 203                 |
| Relaxation Delay | 1.0000              |
| Pulse Width      | 10.7700             |
| Acquisition Time | 2.7263              |
| Acquisition Date | 2015-06-29T01:12:00 |

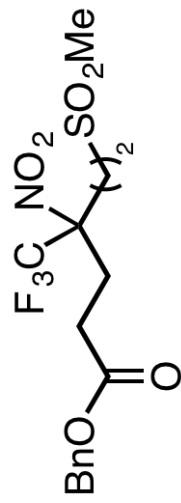

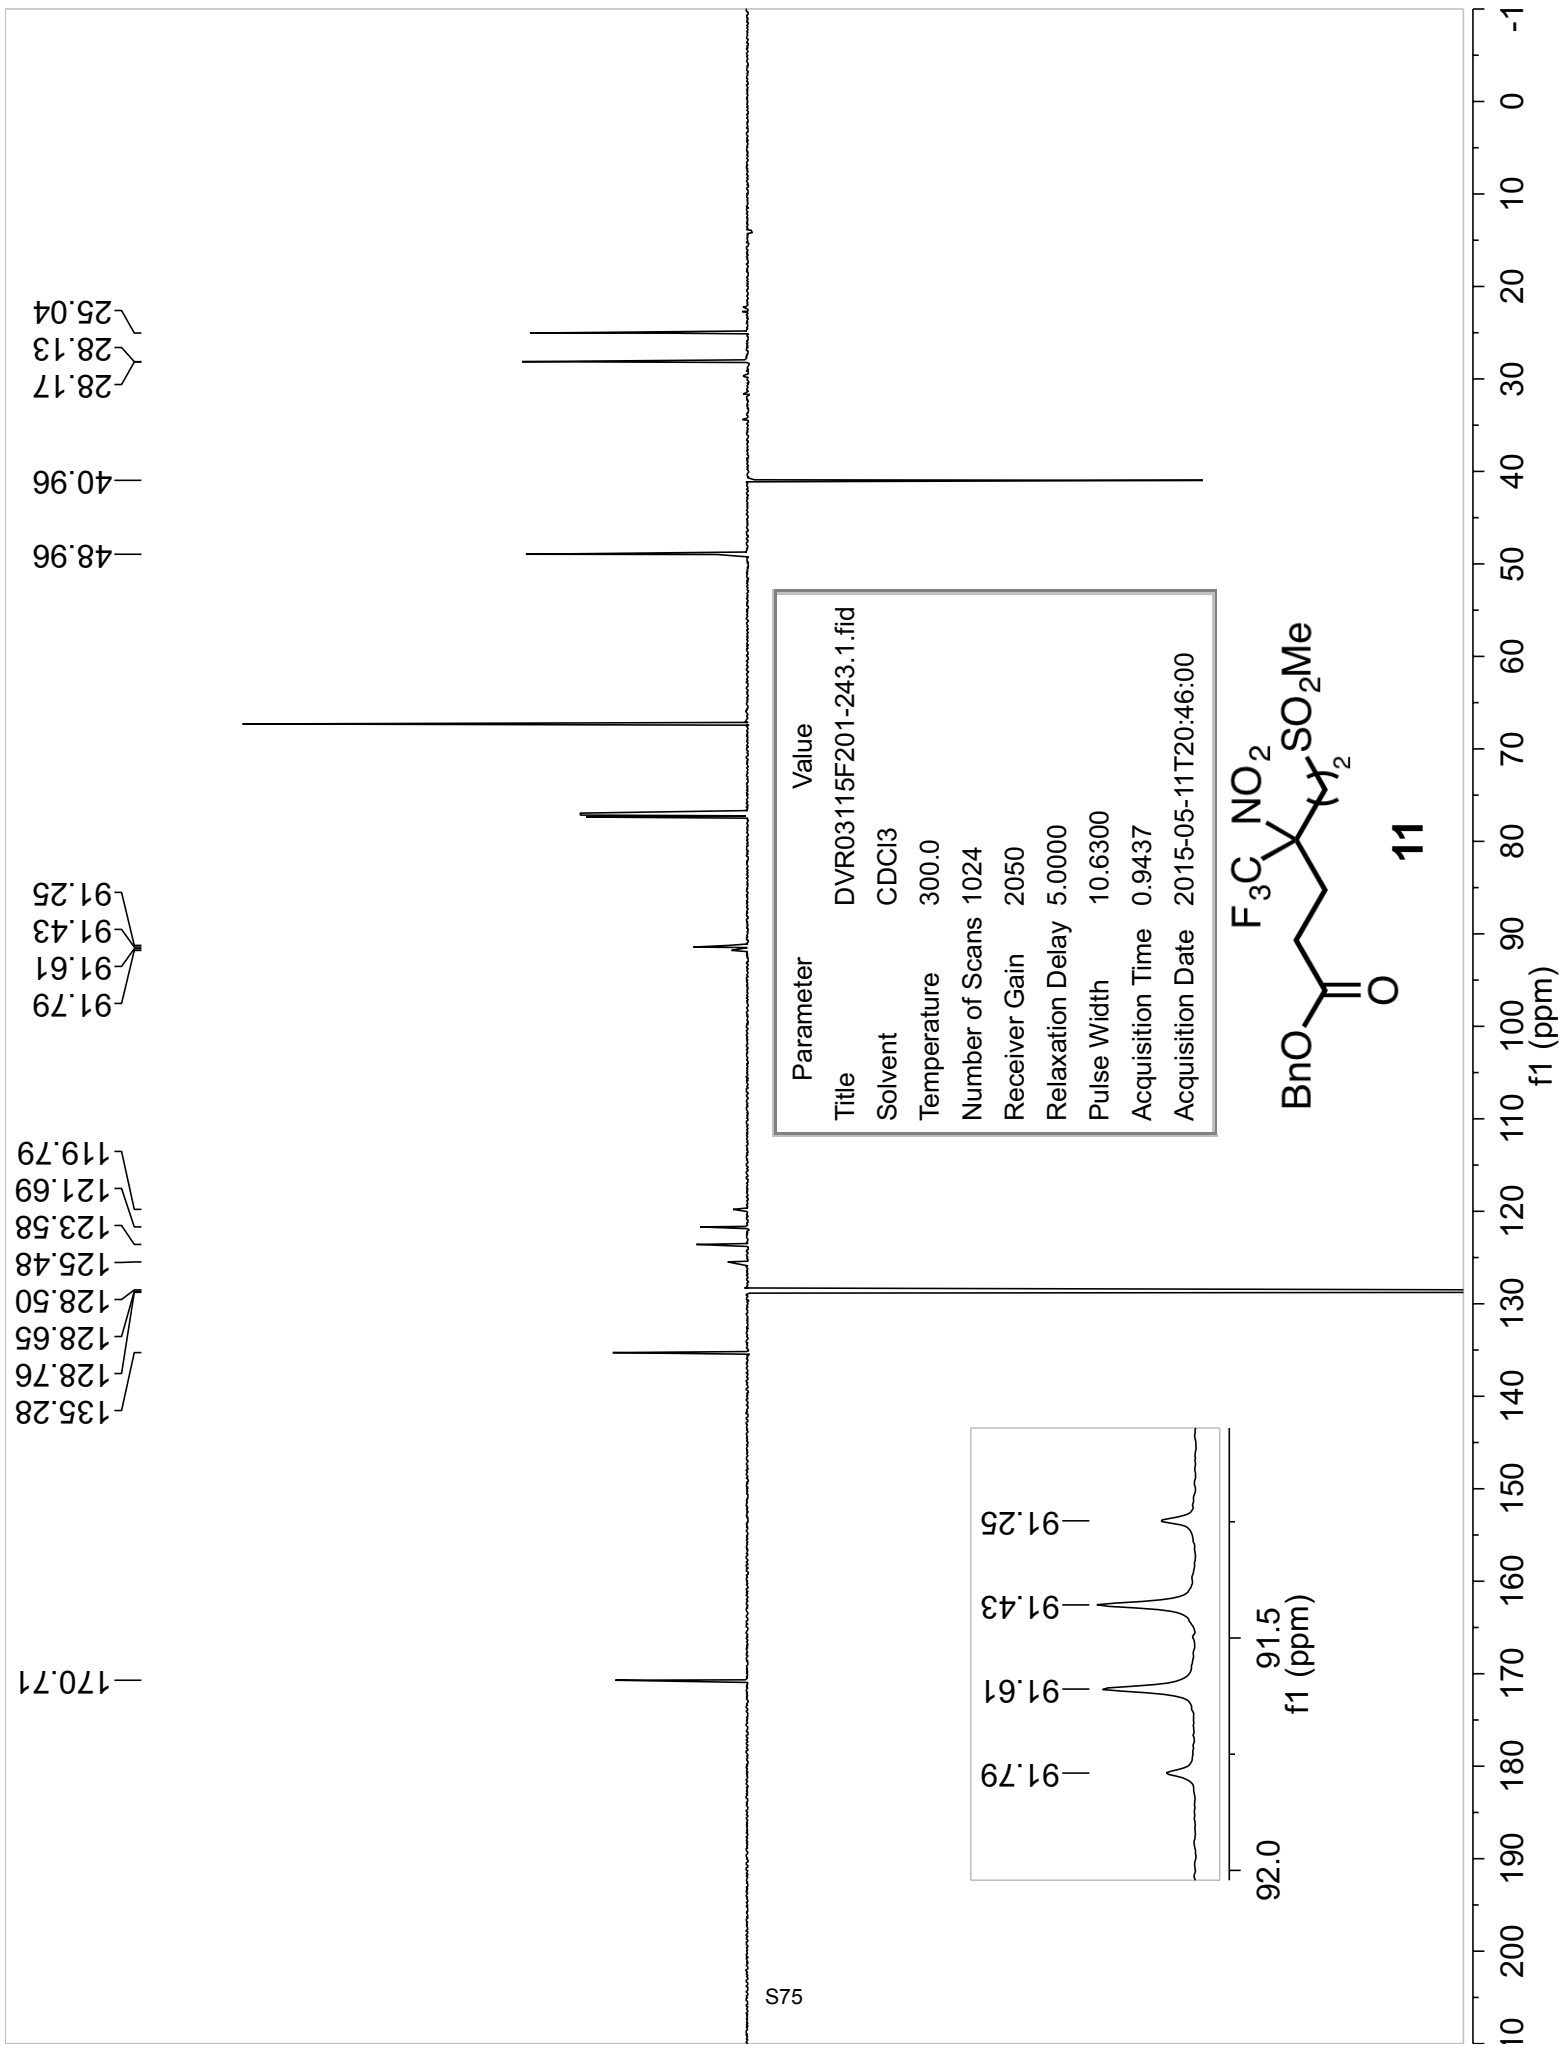

-70.82

| Parameter        | Value                  |
|------------------|------------------------|
| Title            | DVR03115F201-240.2.fid |
| Solvent          | CDCl <sub>3</sub>      |
| Temperature      | 300.0                  |
| Number of Scans  | 16                     |
| Receiver Gain    | 362                    |
| Relaxation Delay | 3.0000                 |
| Pulse Width      | 11.6200                |
| Acquisition Time | 0.4893                 |
| Acquisition Date | 2015-05-11T12:38:00    |

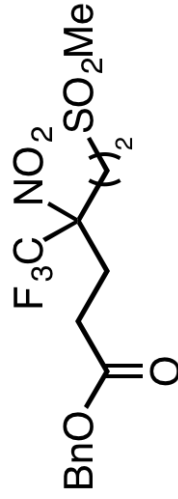

**11**



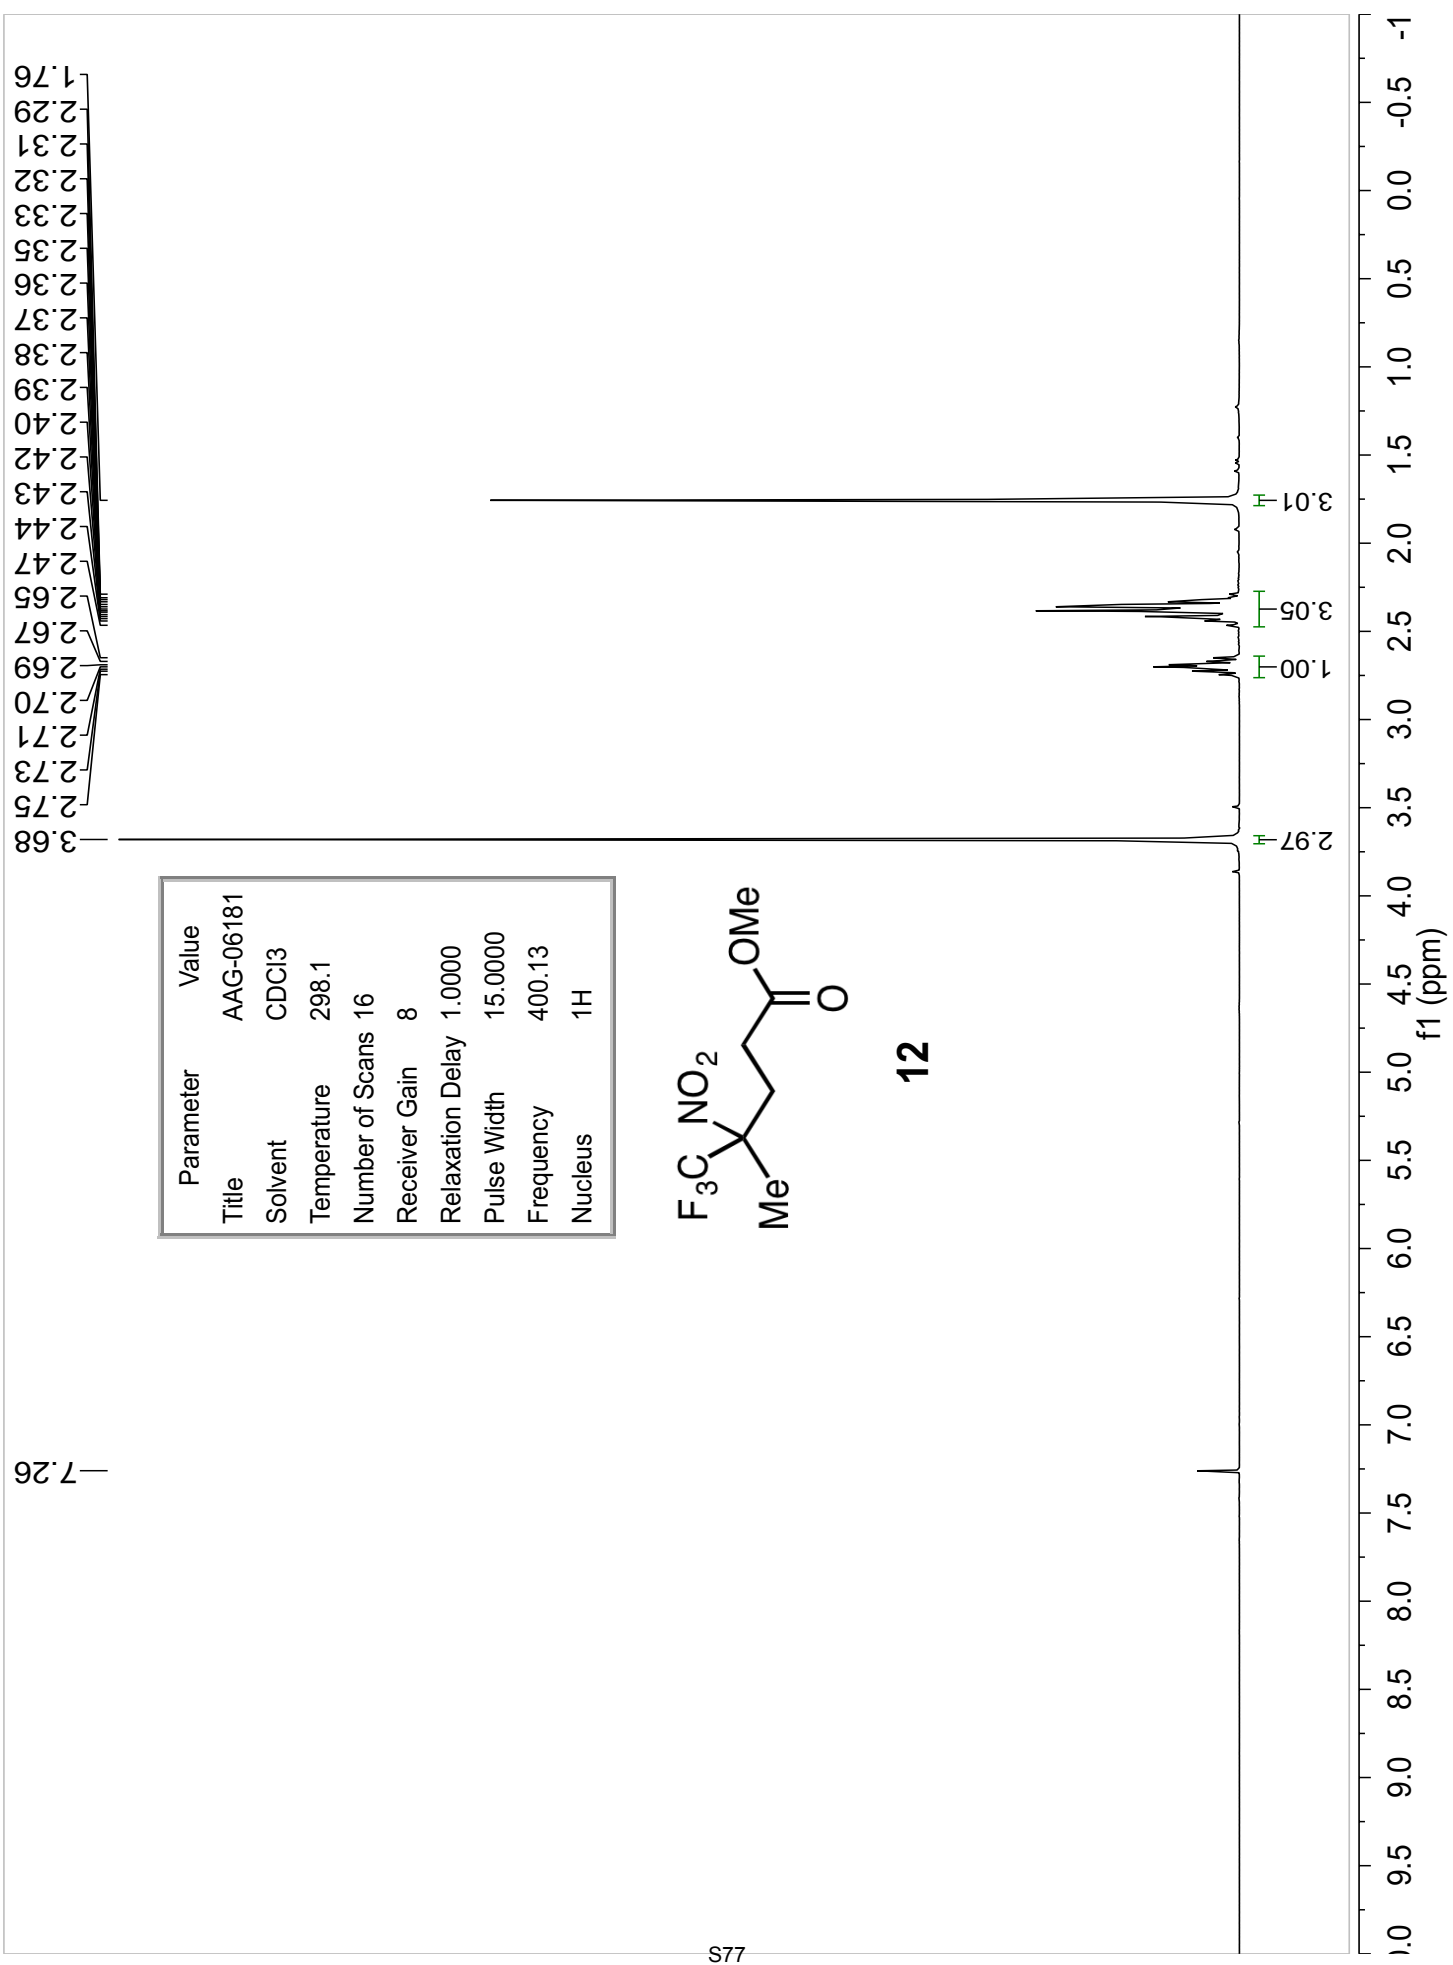

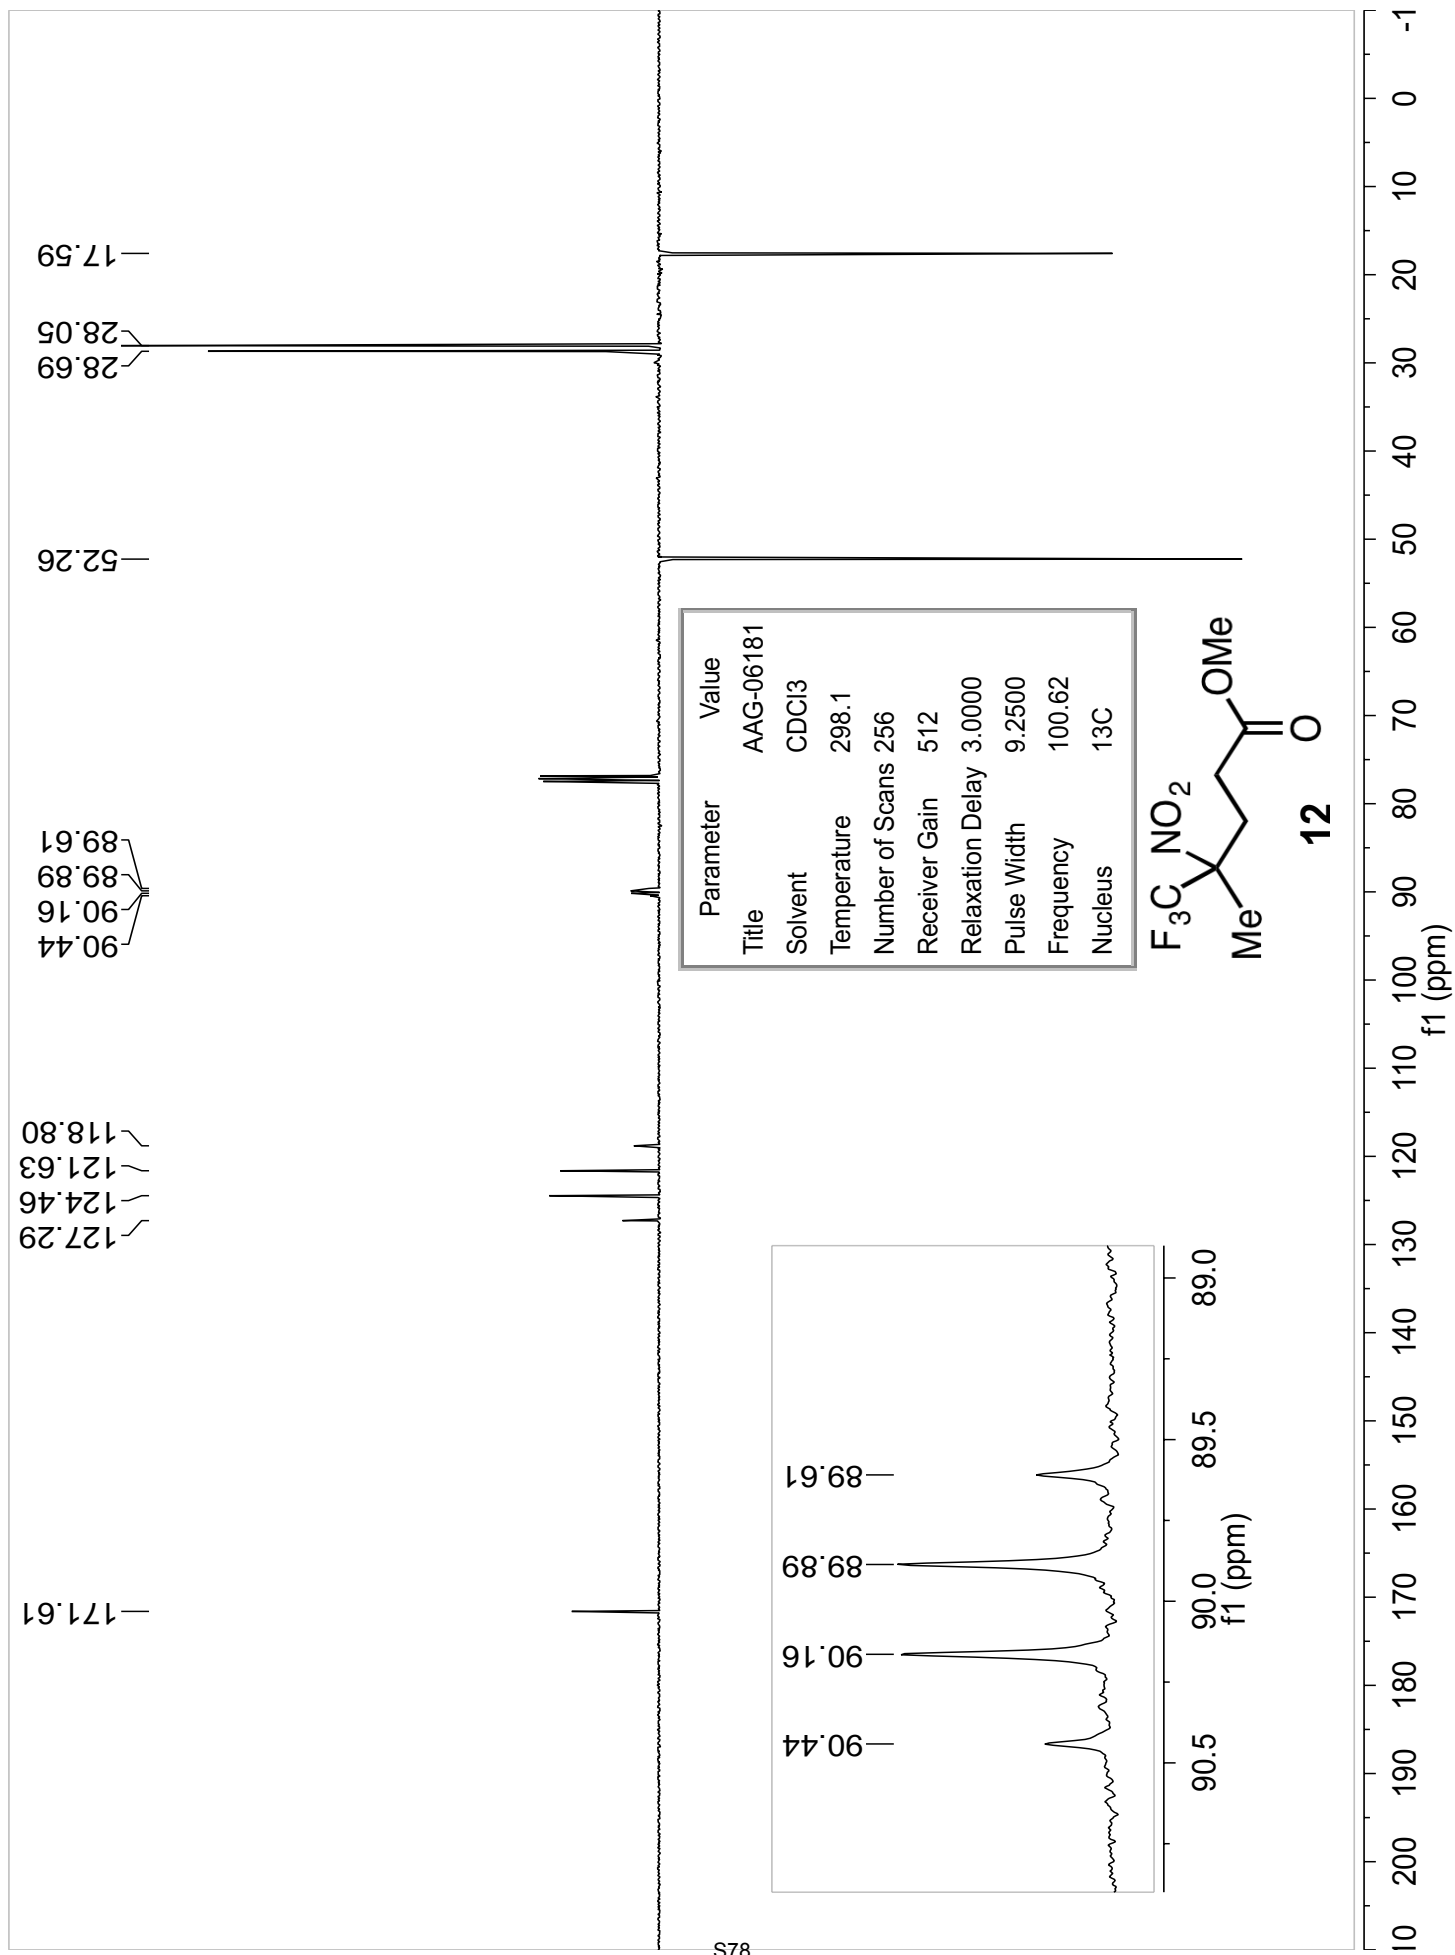

-75.71

| Parameter        | Value       |
|------------------|-------------|
| Title            | AAG-06181-B |
| Solvent          | CDCl3       |
| Temperature      | 298.0       |
| Number of Scans  | 16          |
| Receiver Gain    | 322         |
| Relaxation Delay | 3.0000      |
| Pulse Width      | 11.6200     |
| Frequency        | 564.81      |
| Nucleus          | 19F         |

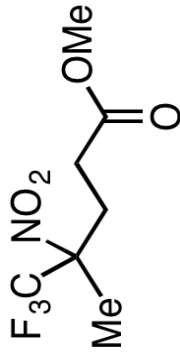

12

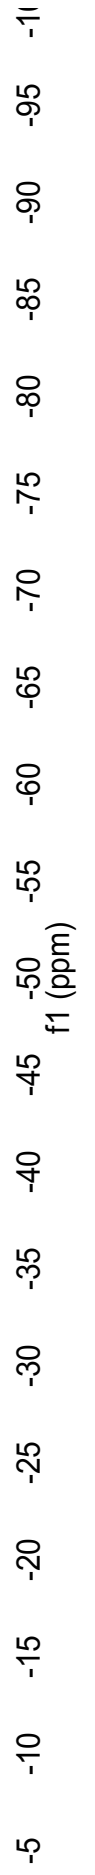

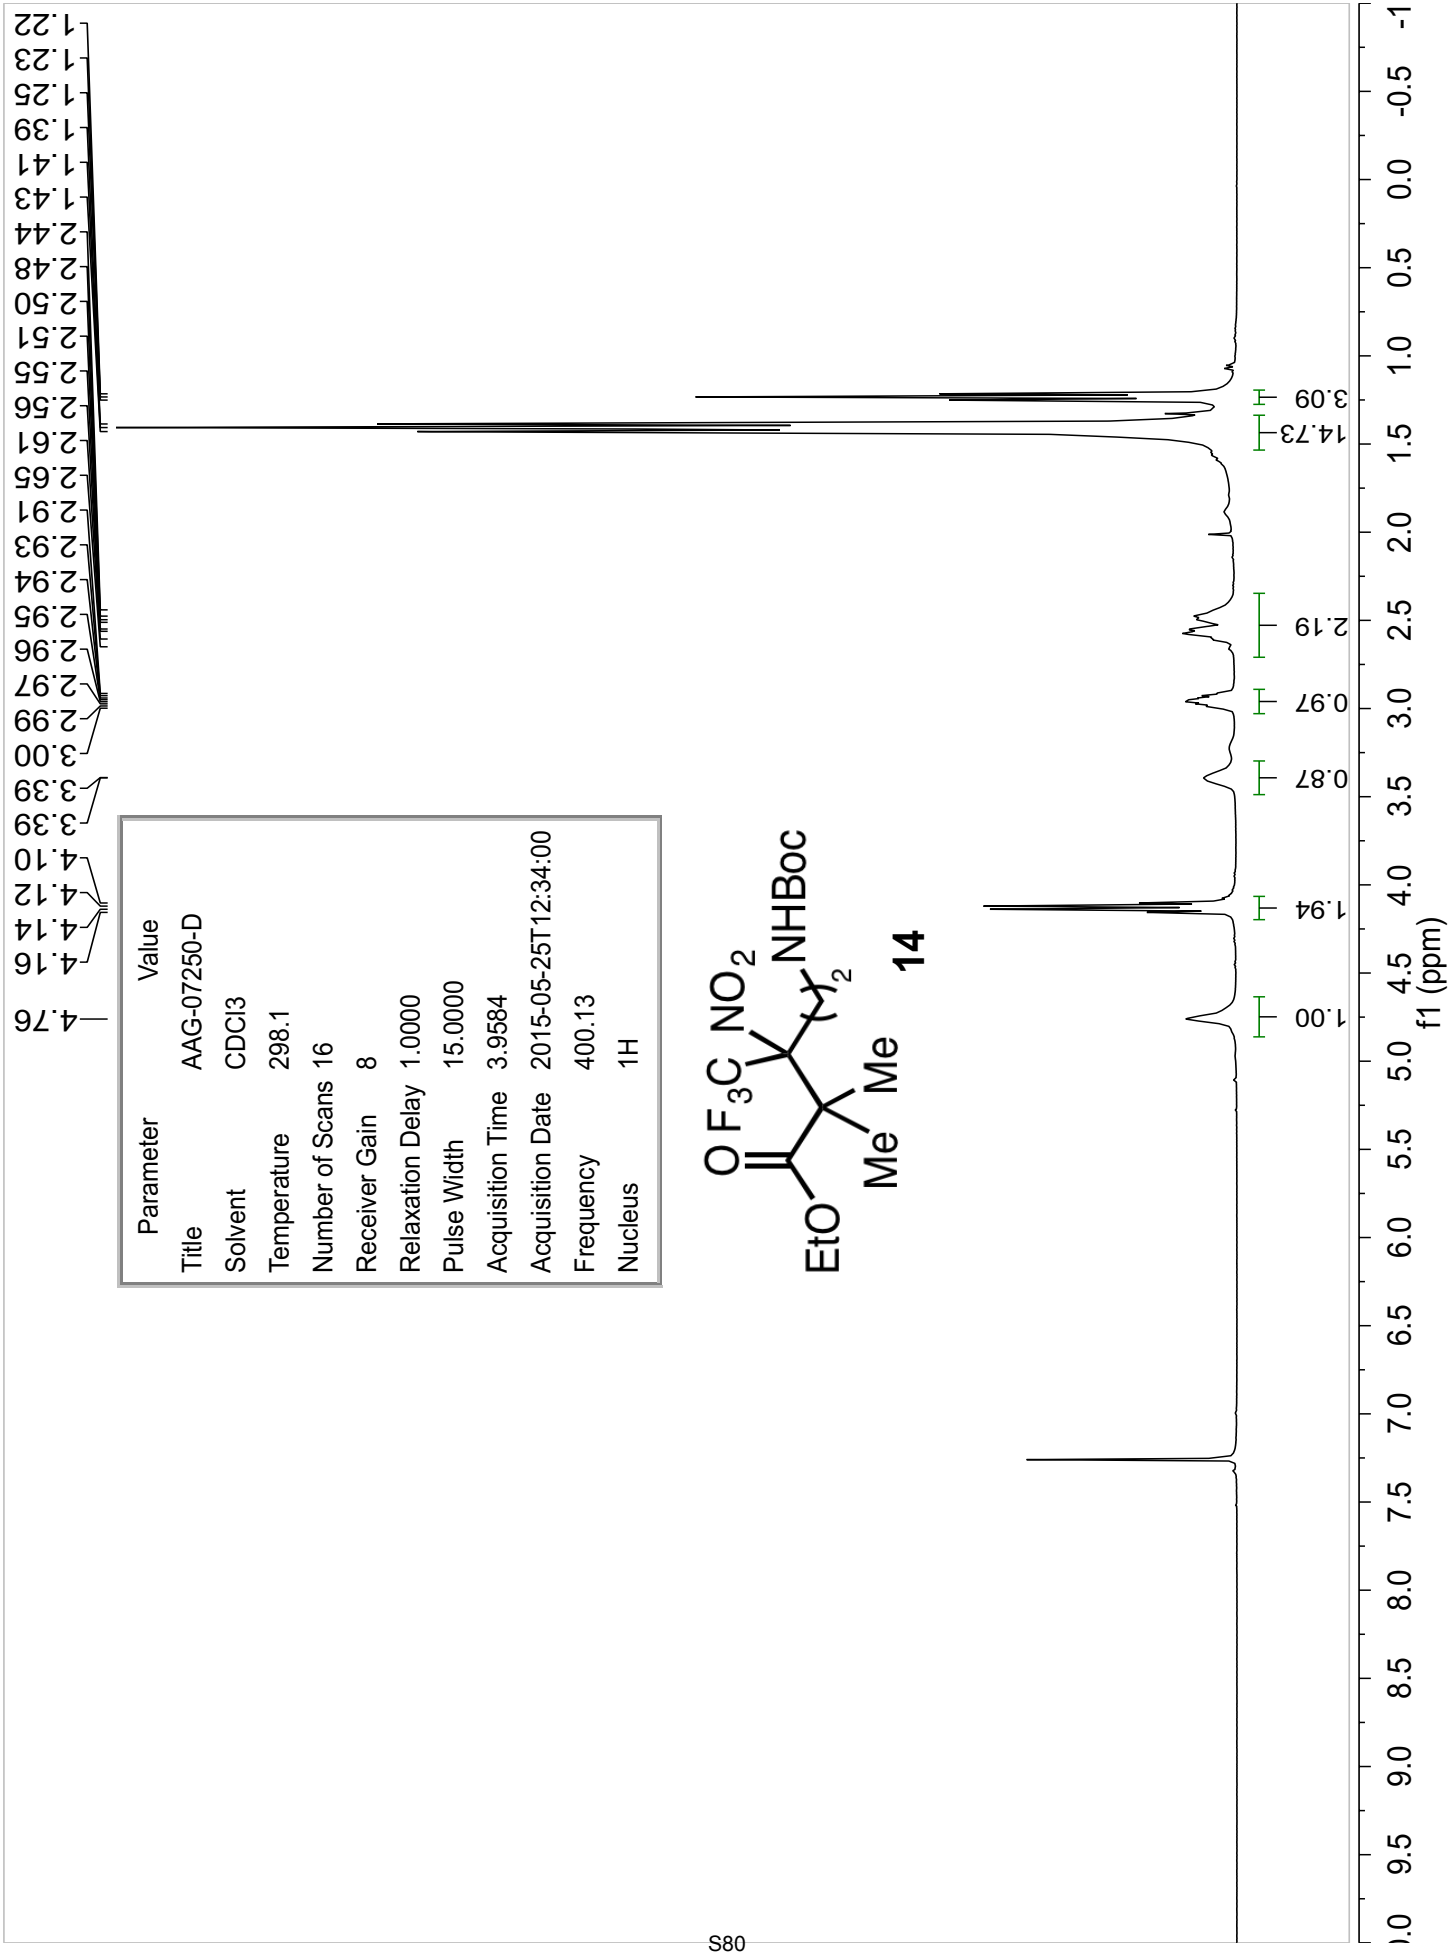

| Parameter        | Value               |
|------------------|---------------------|
| Title            | AAG-07250-D         |
| Solvent          | CDCl3               |
| Temperature      | 298.1               |
| Number of Scans  | 16                  |
| Receiver Gain    | 8                   |
| Relaxation Delay | 1.0000              |
| Pulse Width      | 15.0000             |
| Acquisition Time | 3.9584              |
| Acquisition Date | 2015-05-25T12:34:00 |
| Frequency        | 400.13              |
| Nucleus          | 1H                  |

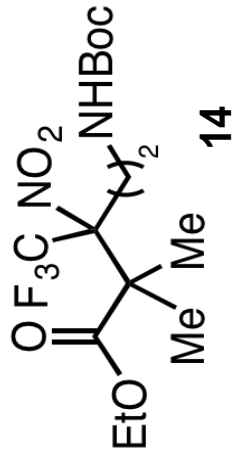



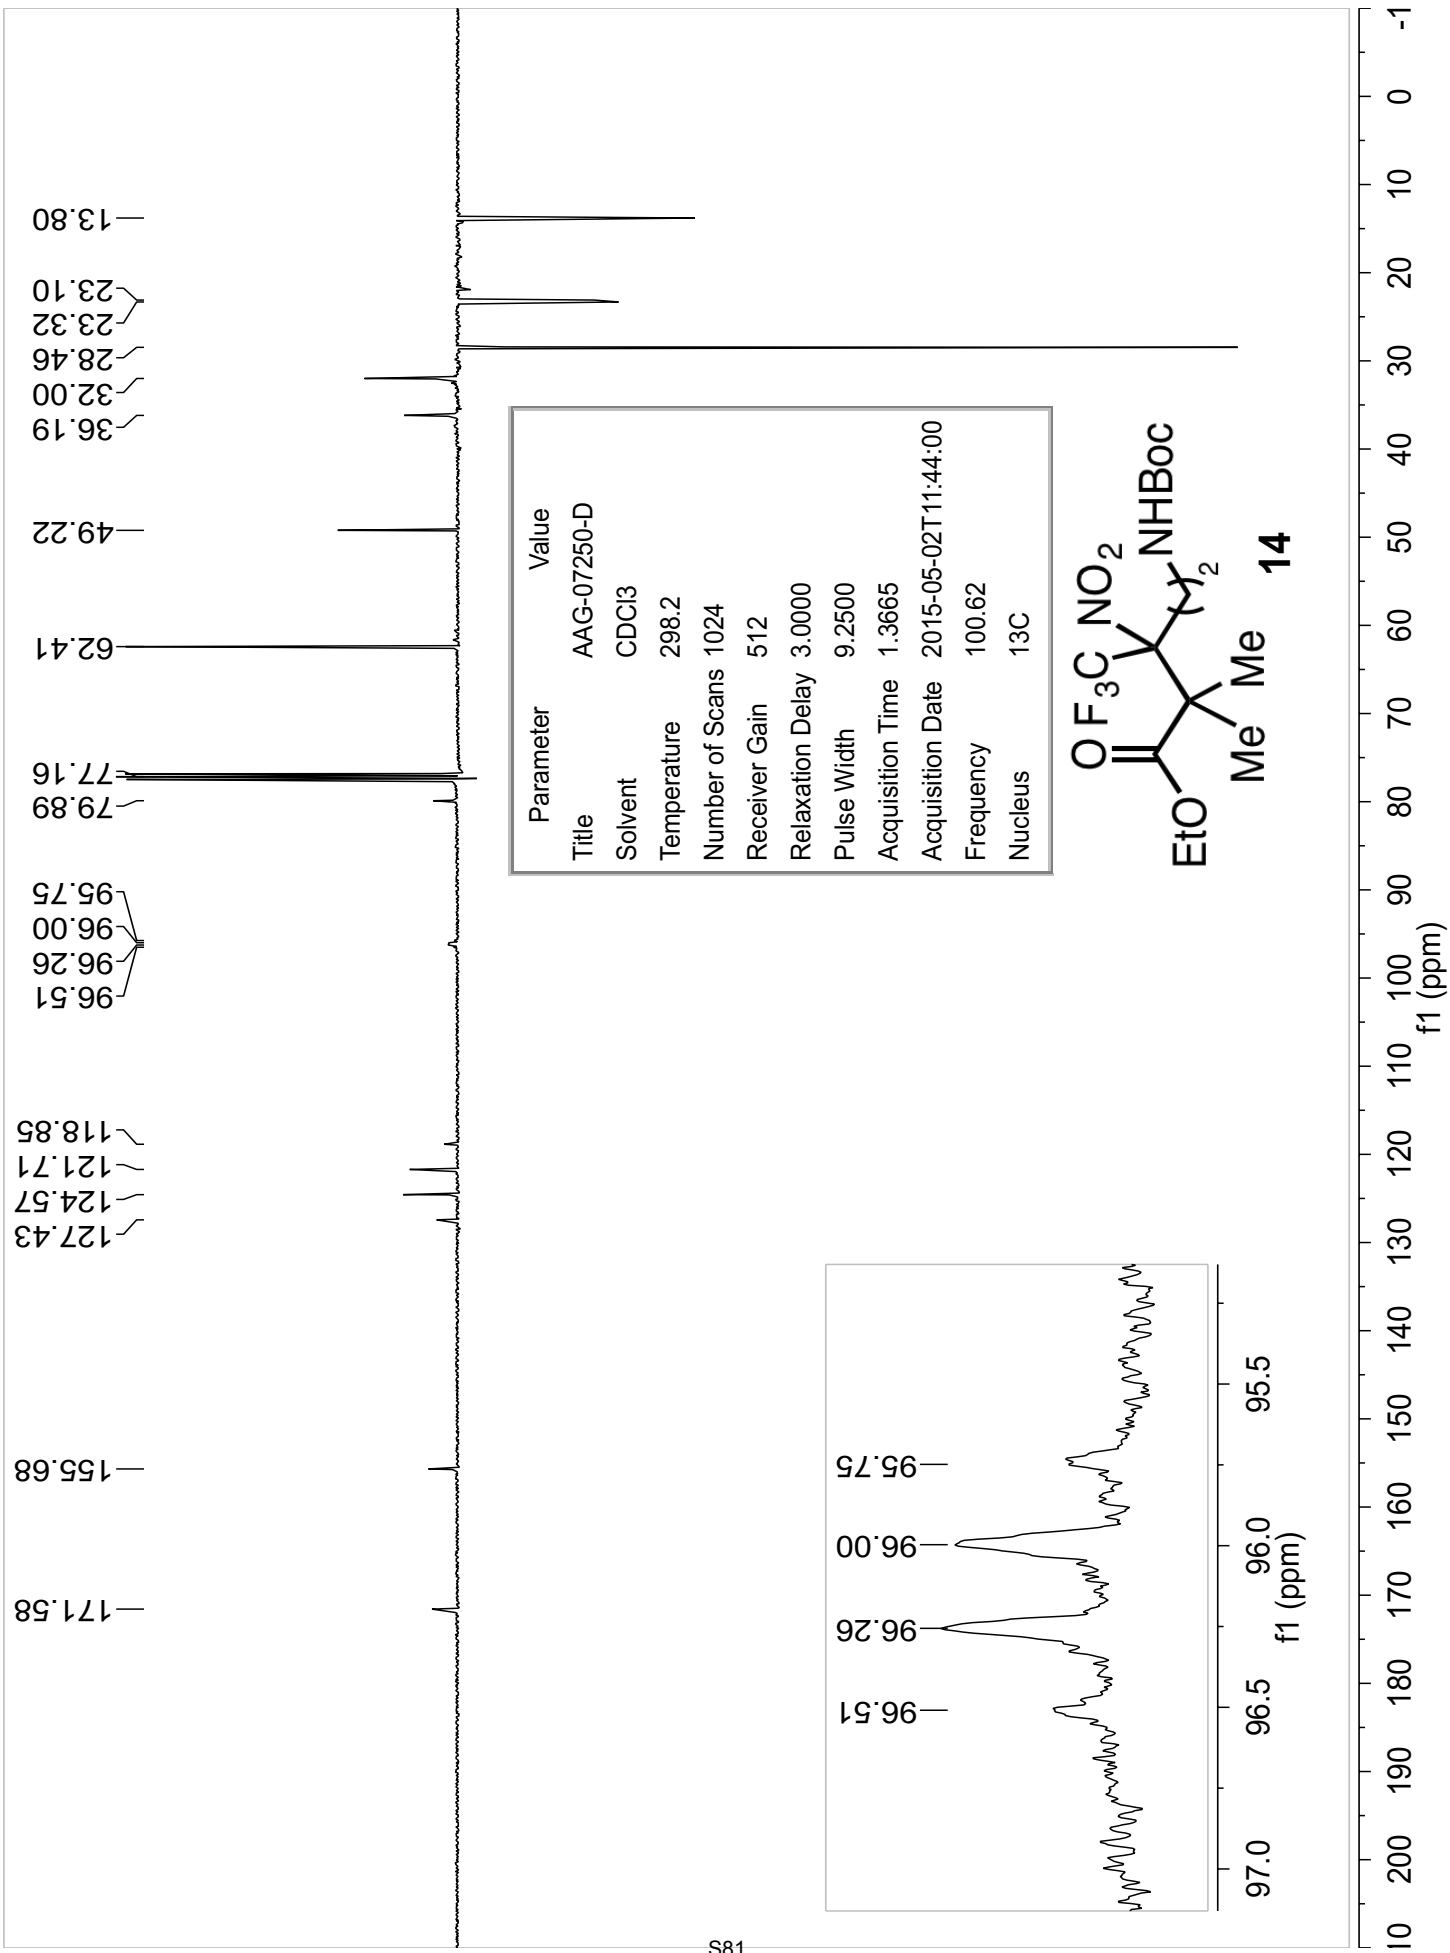

| Parameter        | Value               |
|------------------|---------------------|
| Title            | AAG-07250-D         |
| Solvent          | CDCl3               |
| Temperature      | 300.0               |
| Number of Scans  | 16                  |
| Receiver Gain    | 362                 |
| Relaxation Delay | 3.0000              |
| Pulse Width      | 11.6200             |
| Acquisition Time | 0.4893              |
| Acquisition Date | 2015-05-01T11:43:00 |
| Frequency        | 564.81              |
| Nucleus          | <sup>19</sup> F     |

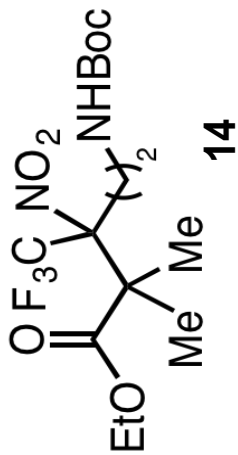

-62.60



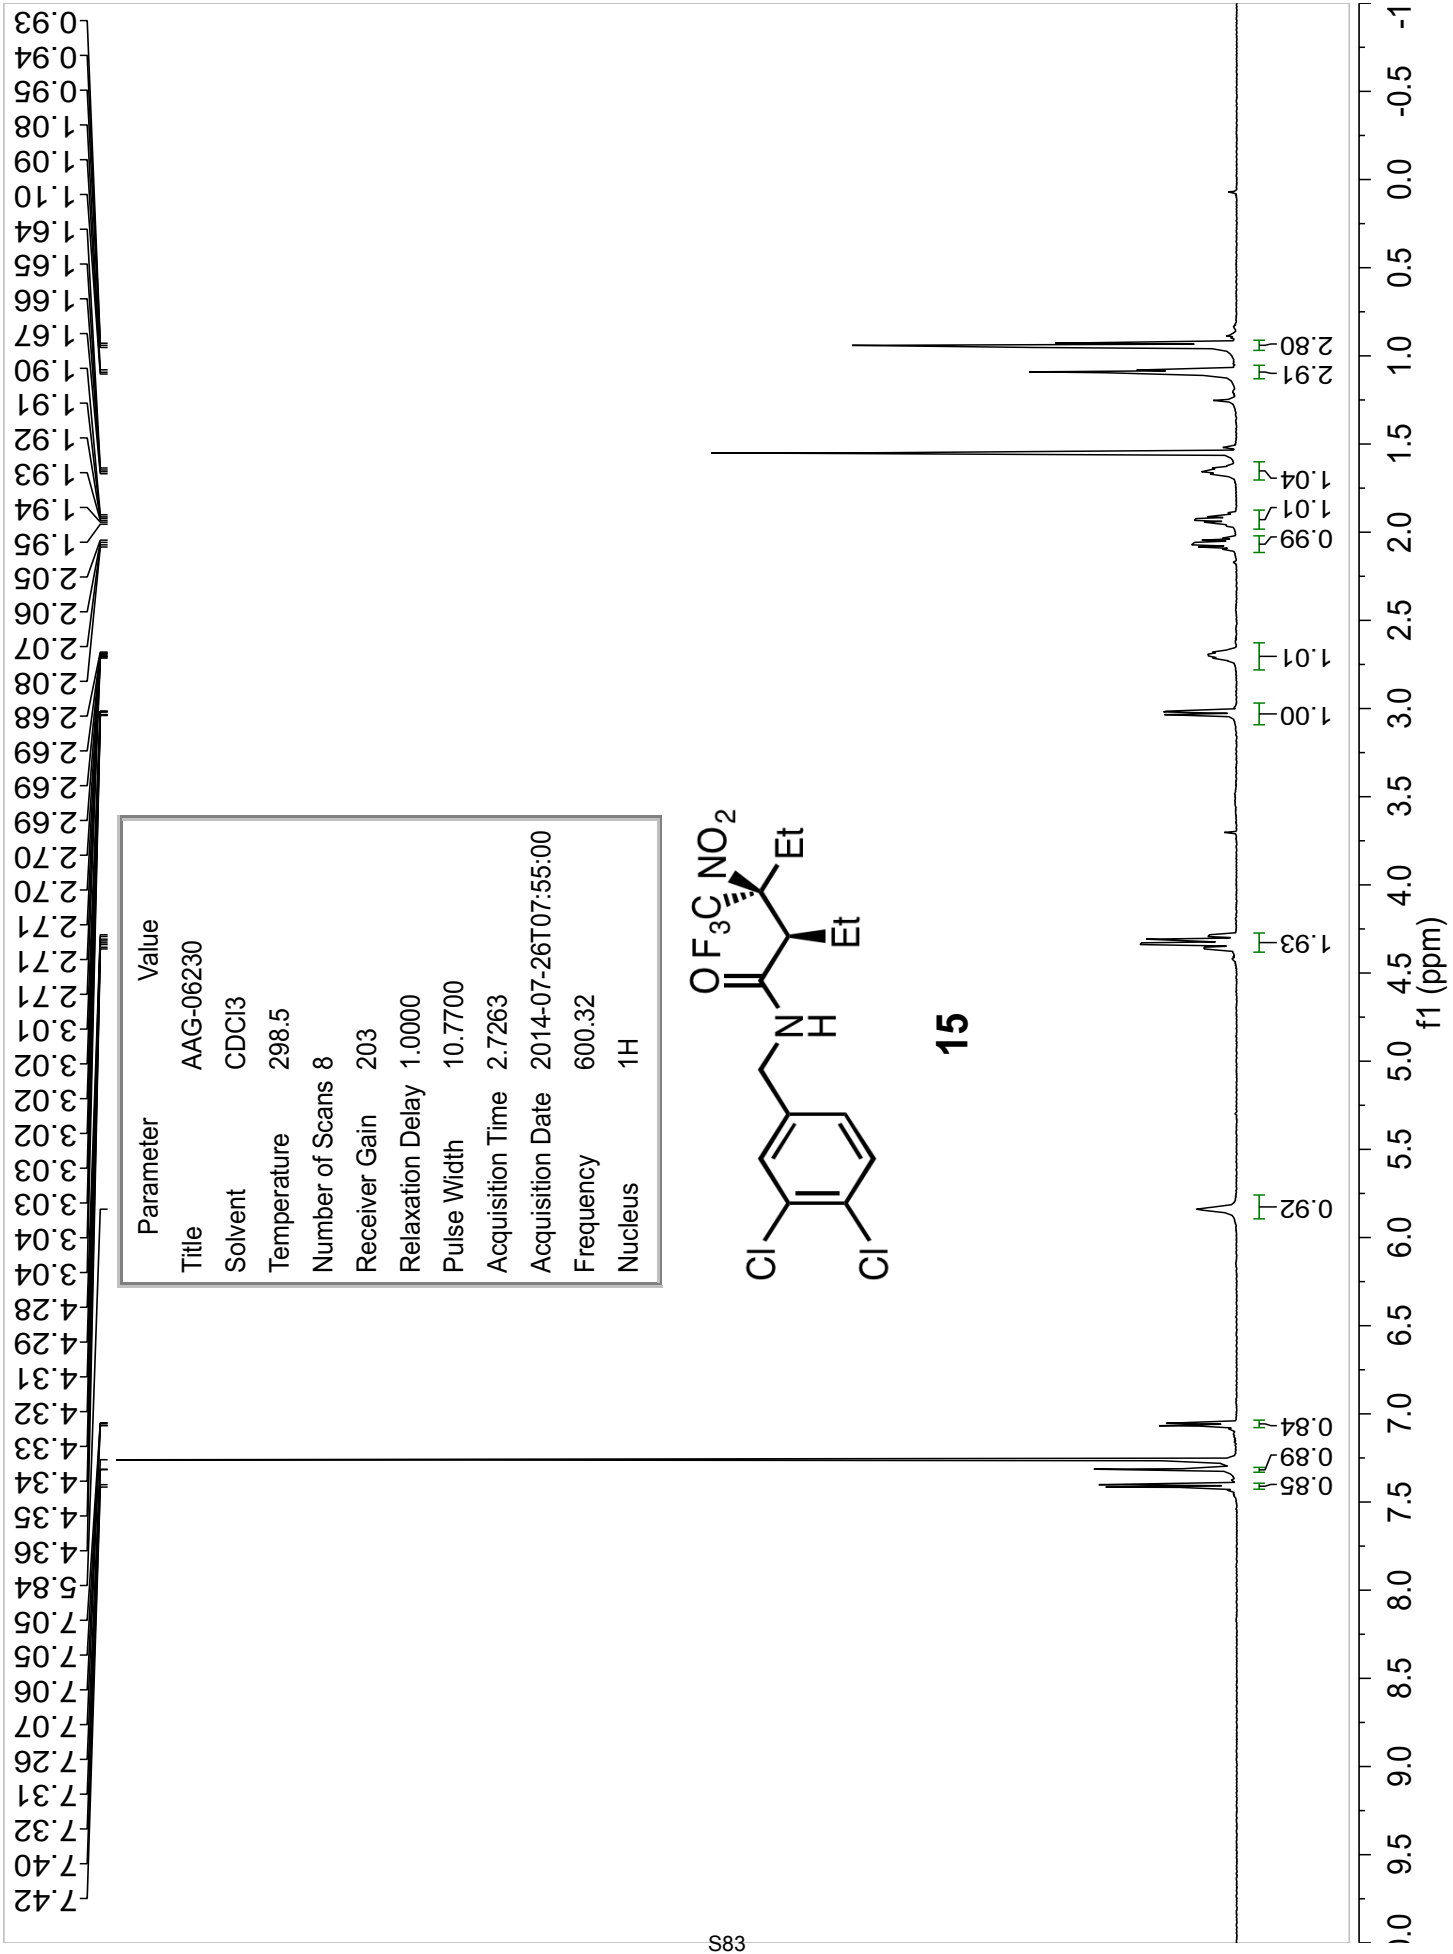

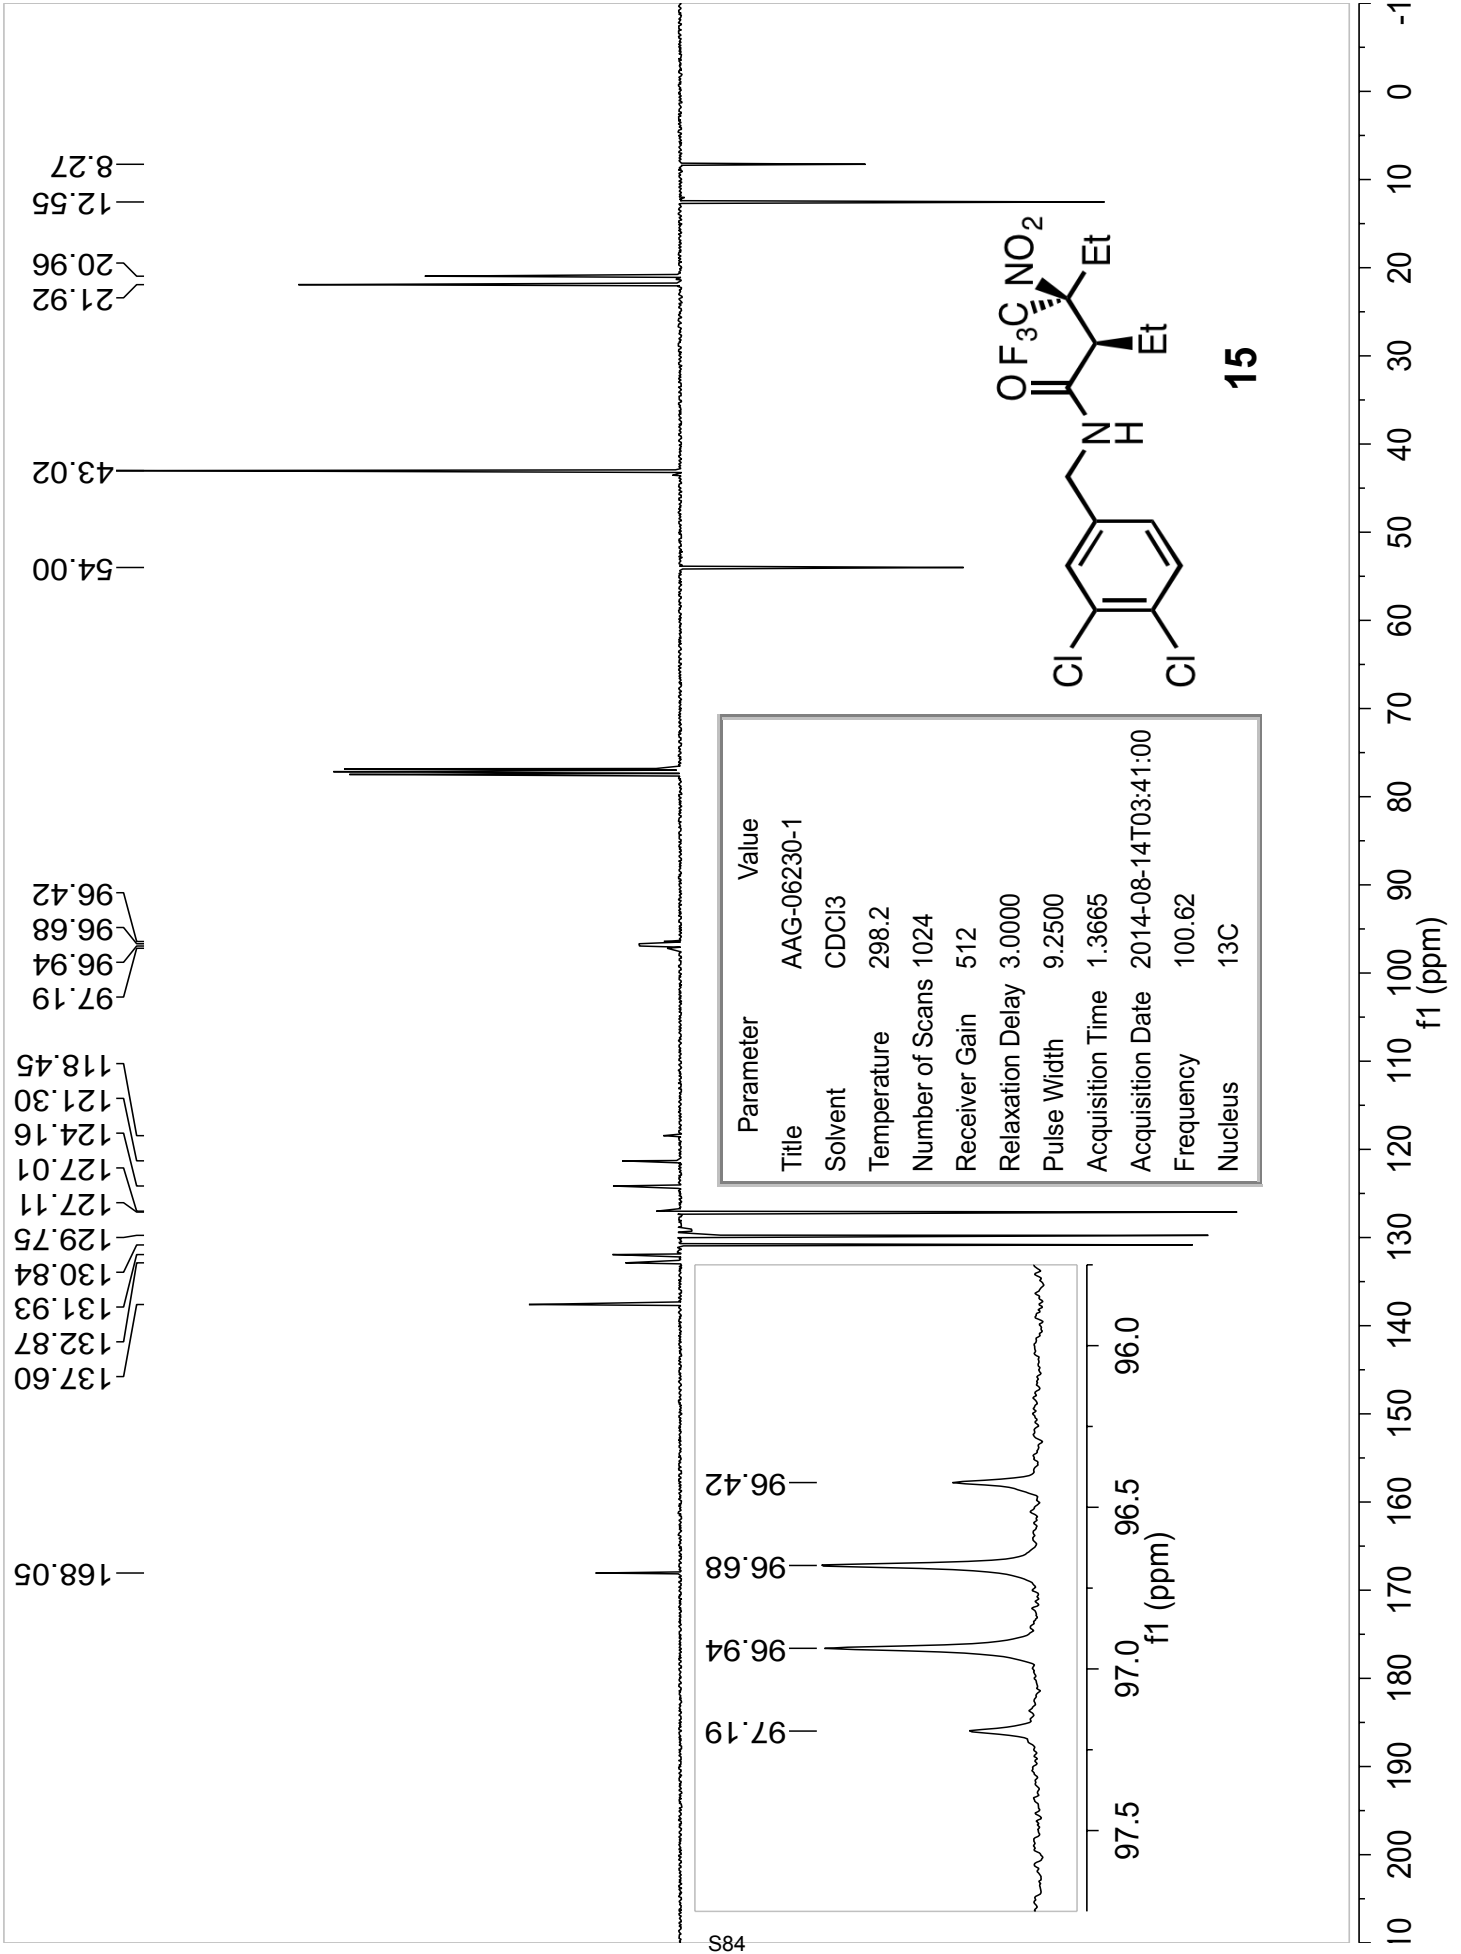

| Parameter        | Value               |
|------------------|---------------------|
| Title            | AAG-06230           |
| Solvent          | CDCl <sub>3</sub>   |
| Temperature      | 298.4               |
| Number of Scans  | 16                  |
| Receiver Gain    | 362                 |
| Relaxation Delay | 3.0000              |
| Pulse Width      | 11.6200             |
| Acquisition Time | 0.4893              |
| Acquisition Date | 2014-07-26T07:58:00 |
| Frequency        | 564.81              |
| Nucleus          | <sup>19</sup> F     |

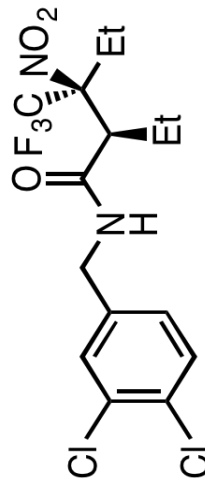

**15**

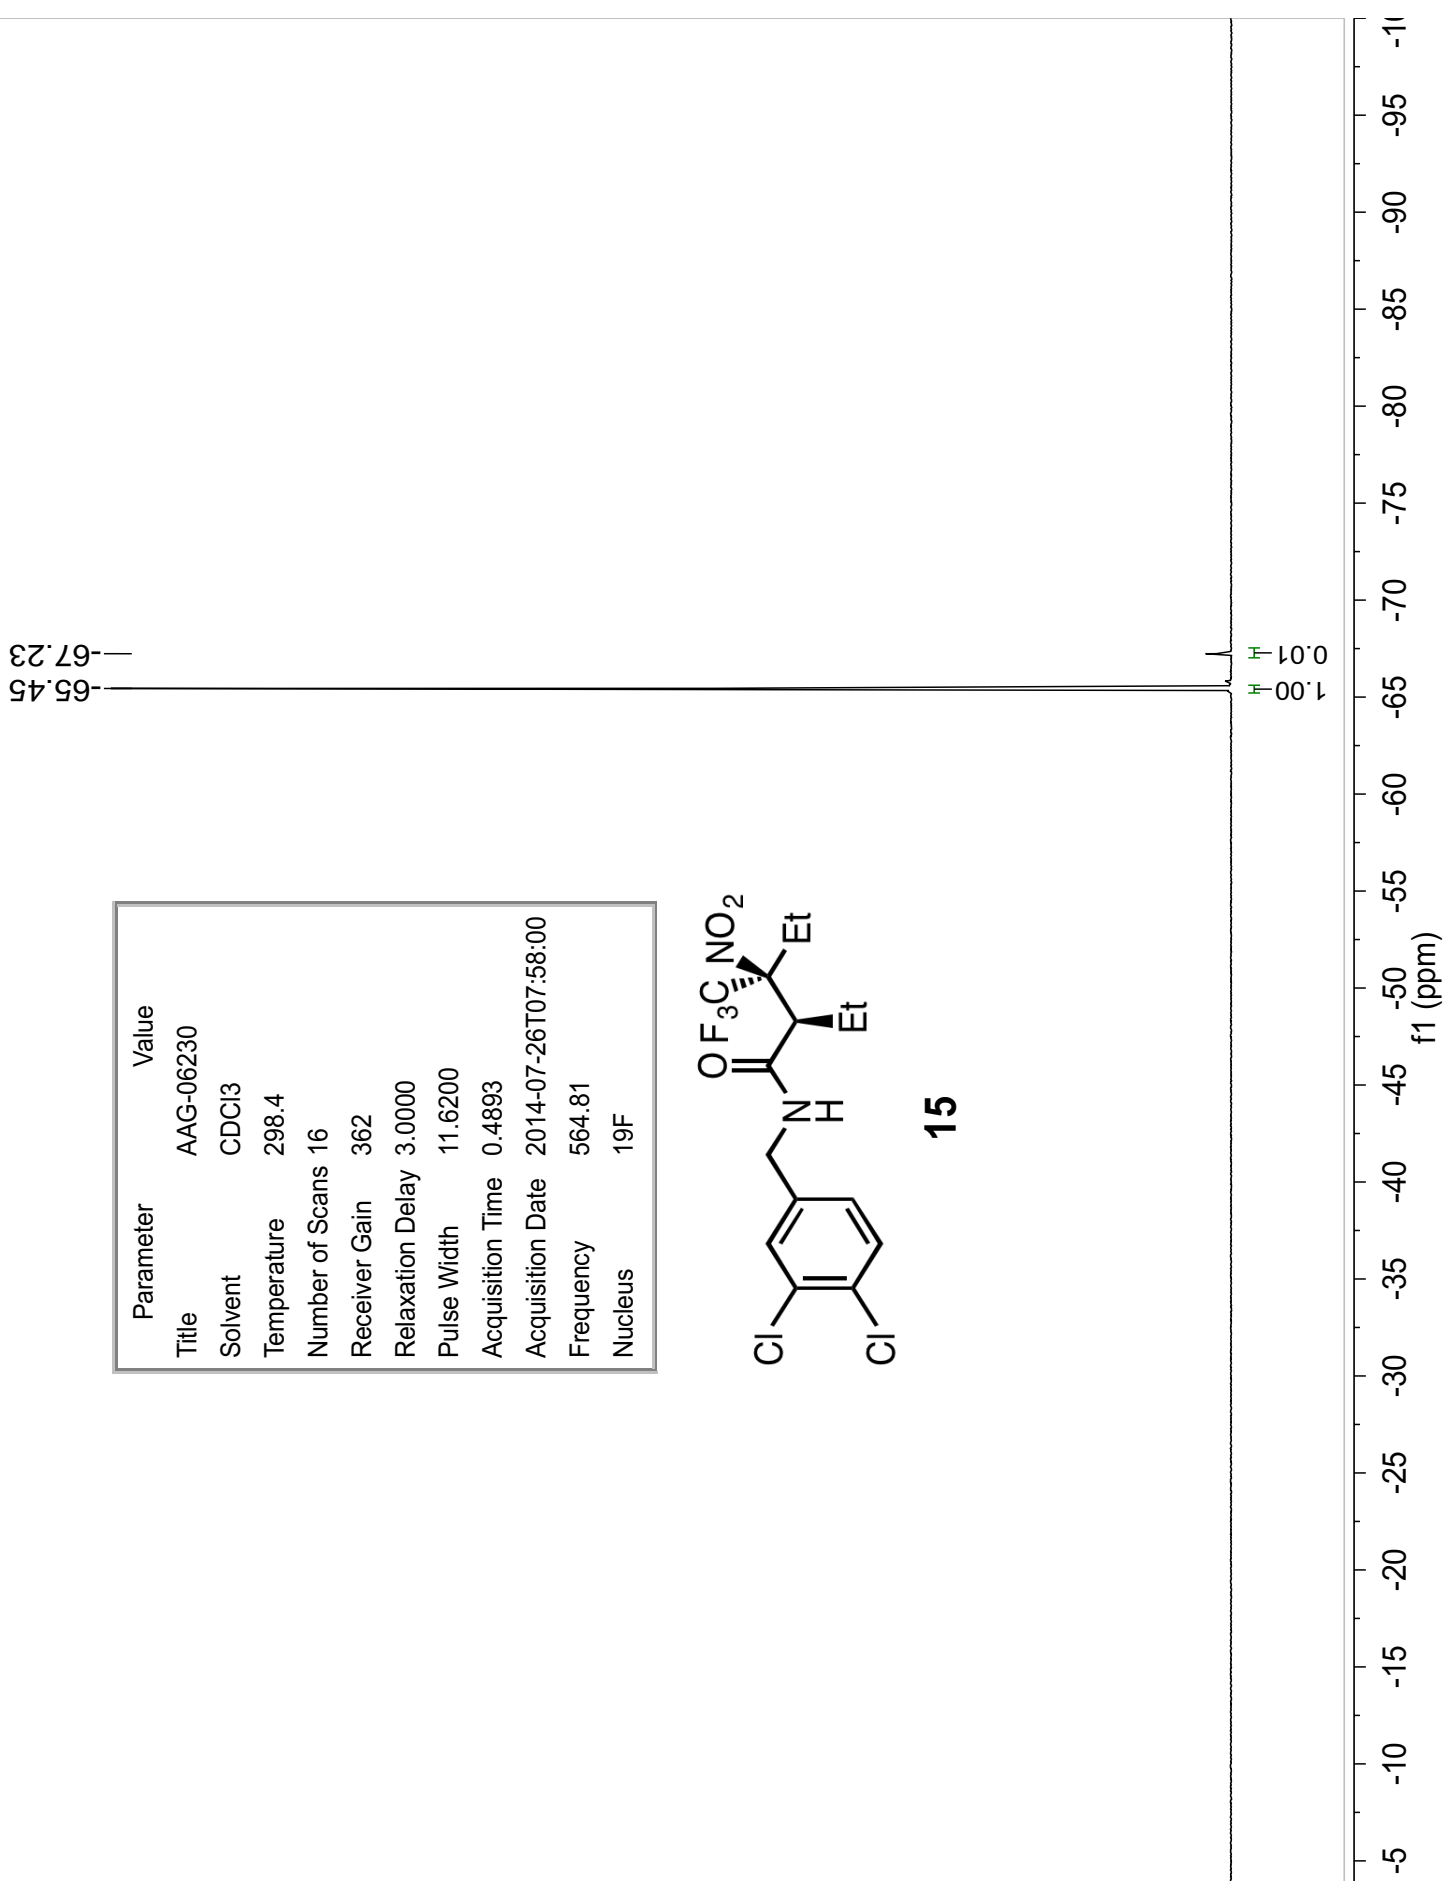

4.07  
4.05  
4.04  
4.02  
3.71  
3.15  
2.95  
2.94  
2.94  
2.92  
2.92  
2.92  
2.91  
2.90  
2.90  
2.89  
2.88  
2.88  
2.87  
2.86  
2.86  
2.85  
2.85  
2.21  
2.19  
2.17  
2.15  
2.13  
2.11  
1.37  
1.35  
1.13  
1.13  
1.12  
1.11  
1.10  
1.09

| Parameter        | Value                 |
|------------------|-----------------------|
| Title            | DVR03104F95-161.1.fid |
| Solvent          | CDCl3                 |
| Temperature      | 298.2                 |
| Number of Scans  | 16                    |
| Receiver Gain    | 10                    |
| Relaxation Delay | 1.0000                |
| Pulse Width      | 15.0000               |
| Acquisition Time | 3.9584                |
| Acquisition Date | 2015-04-30T22:59:00   |

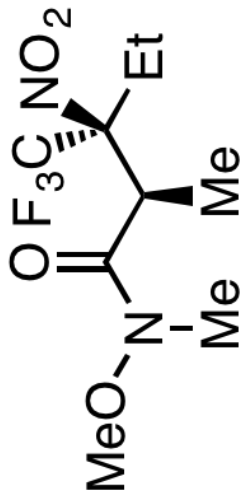

16

0.93  
3.07  
3.00  
0.95  
0.91  
3.08  
3.18

9.5 9.0 8.5 8.0 7.5 7.0 6.5 6.0 5.5 5.0 4.5 4.0 3.5 3.0 2.5 2.0 1.5 1.0 0.5 0.0 -0.5

f1 (ppm)

171.12

125.99  
124.09  
122.19  
120.29

95.53  
95.36  
95.20  
95.03

| Parameter        | Value                 |
|------------------|-----------------------|
| Title            | DVR03106F95-161.1.fid |
| Solvent          | CDCl3                 |
| Temperature      | 300.0                 |
| Number of Scans  | 1024                  |
| Receiver Gain    | 2050                  |
| Relaxation Delay | 5.0000                |
| Pulse Width      | 10.6300               |
| Acquisition Time | 0.9437                |
| Acquisition Date | 2015-05-01T23:53:00   |

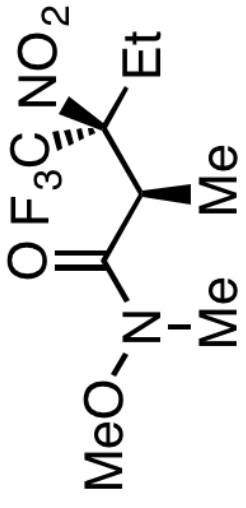

16

39.15  
32.36  
22.73  
13.77  
8.54

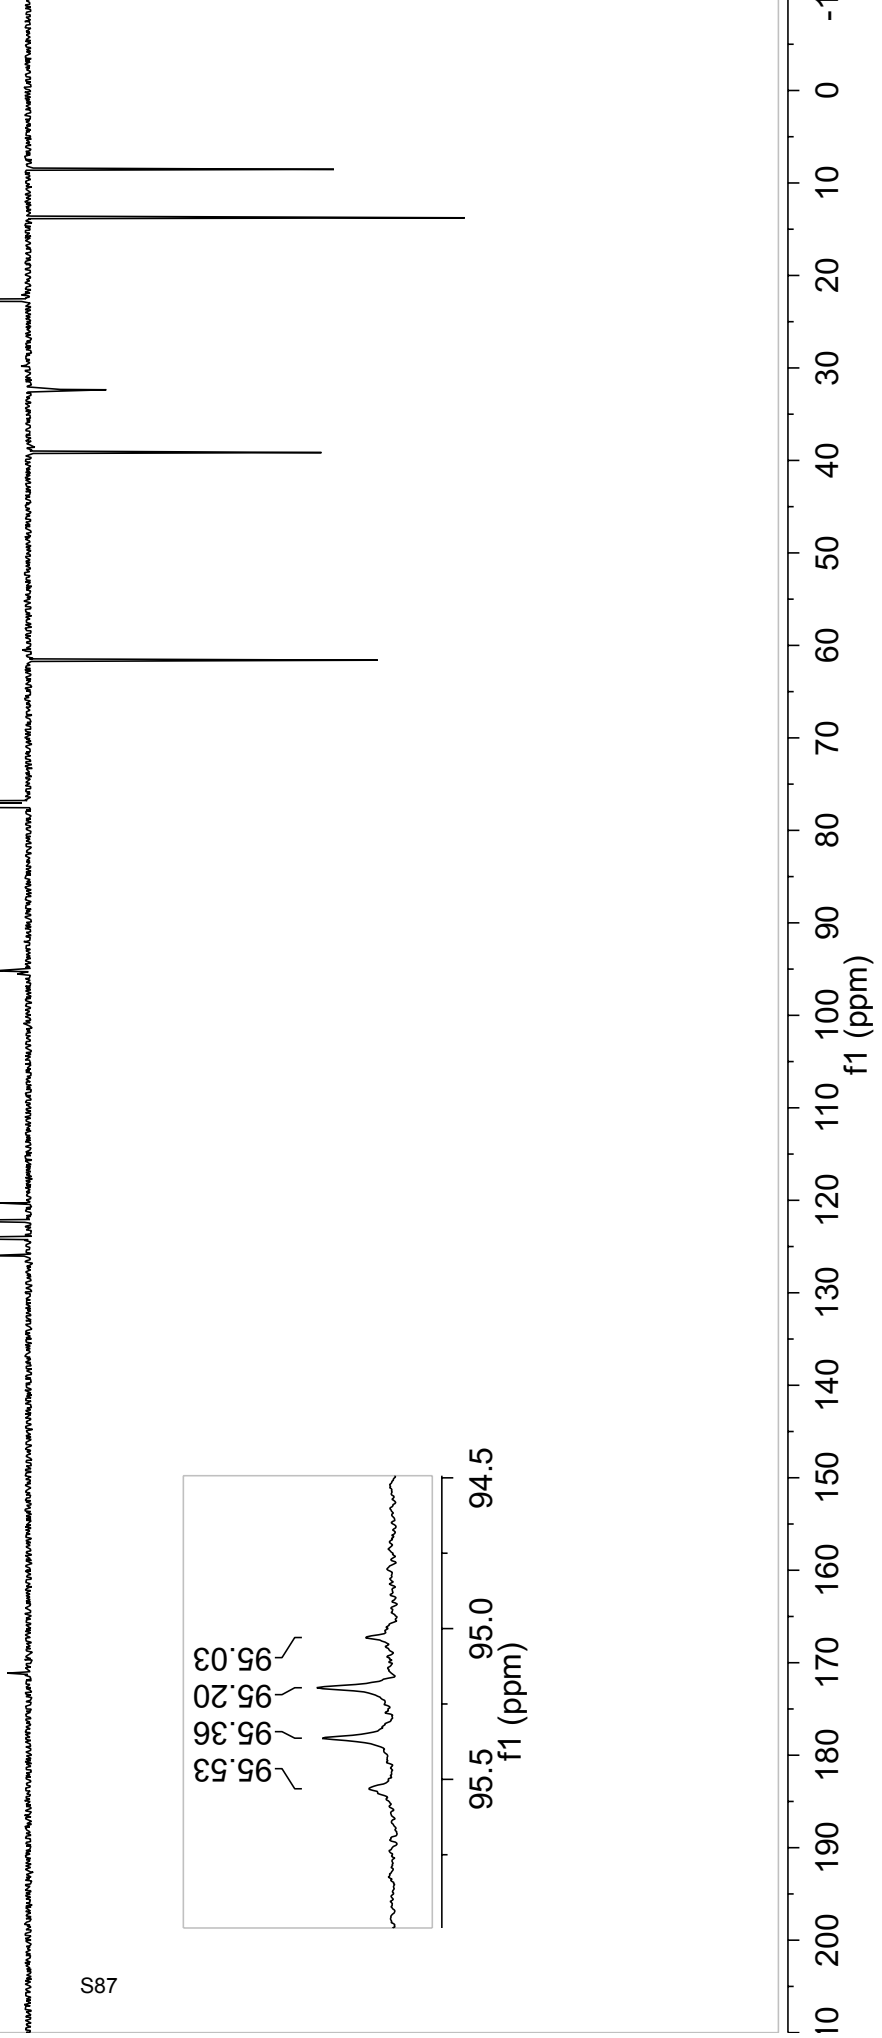

66.88  
67.21

| Parameter        | Value                 |
|------------------|-----------------------|
| Title            | DVR03106F95-161.2.fid |
| Solvent          | CDCl <sub>3</sub>     |
| Temperature      | 300.0                 |
| Number of Scans  | 16                    |
| Receiver Gain    | 203                   |
| Relaxation Delay | 3.0000                |
| Pulse Width      | 11.6200               |
| Acquisition Time | 0.4893                |
| Acquisition Date | 2015-05-01T23:56:00   |

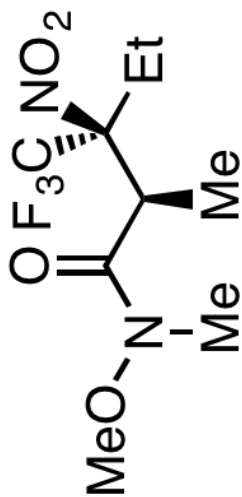

16





| Parameter                | Value             |
|--------------------------|-------------------|
| 1 Title                  | DVR03126CRD.1.fid |
| 2 Solvent                | CDCl3             |
| 3 Temperature            | 300.0             |
| 4 Number of Scans        | 16                |
| 5 Receiver Gain          | 203               |
| 6 Relaxation Delay       | 1.0000            |
| 7 Pulse Width            | 10.7700           |
| 8 Spectrometer Frequency | 600.32            |
| 9 Nucleus                | <sup>1</sup> H    |

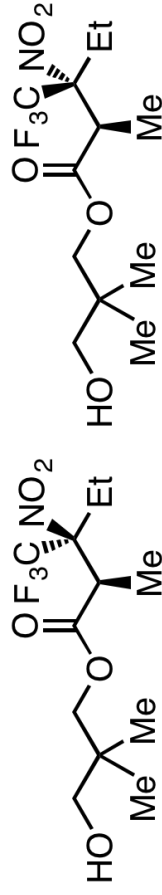

**Crude**  
**17A dr: 83:17**    **17B**

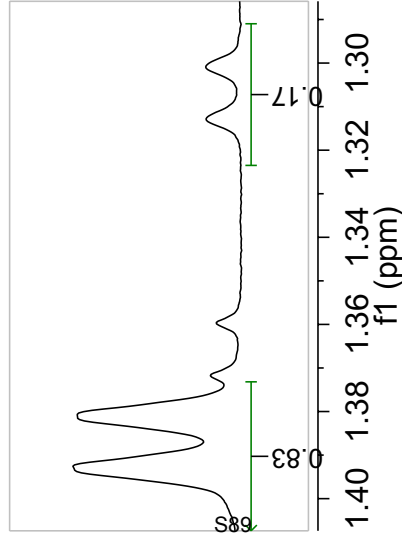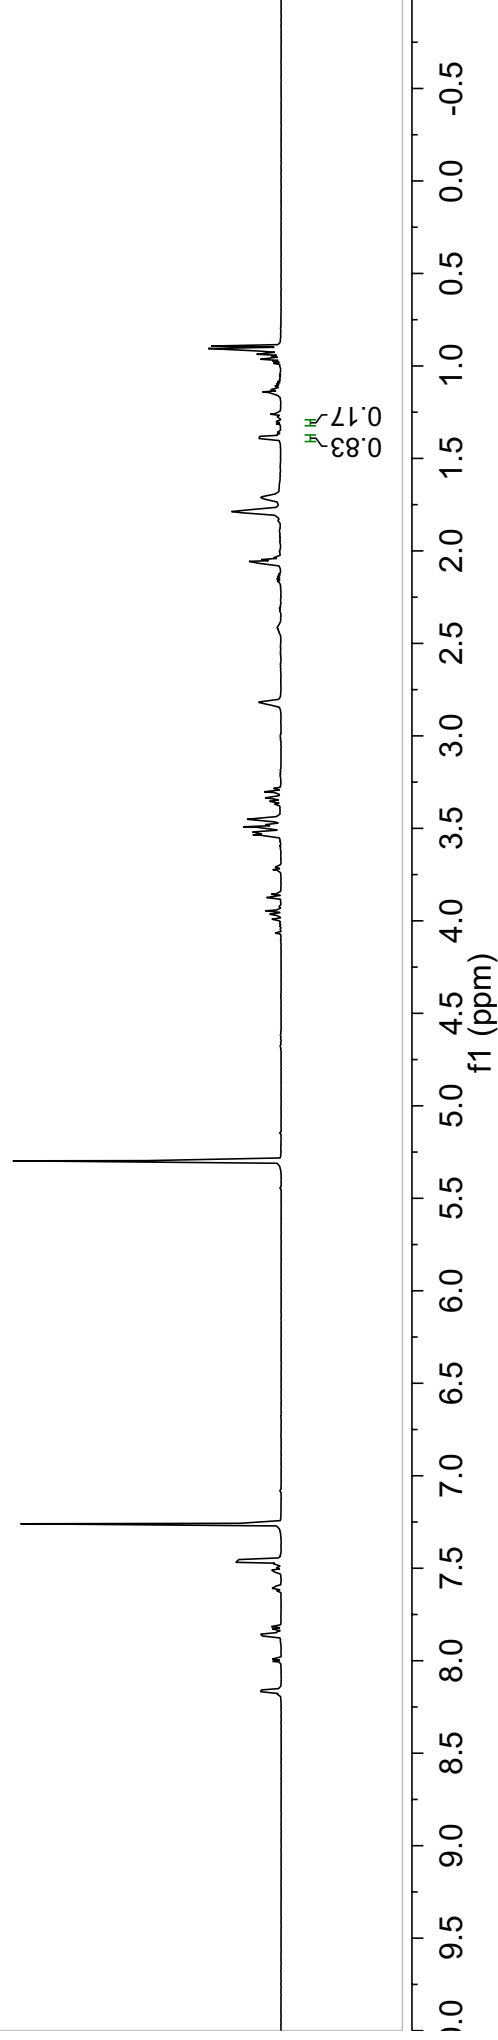



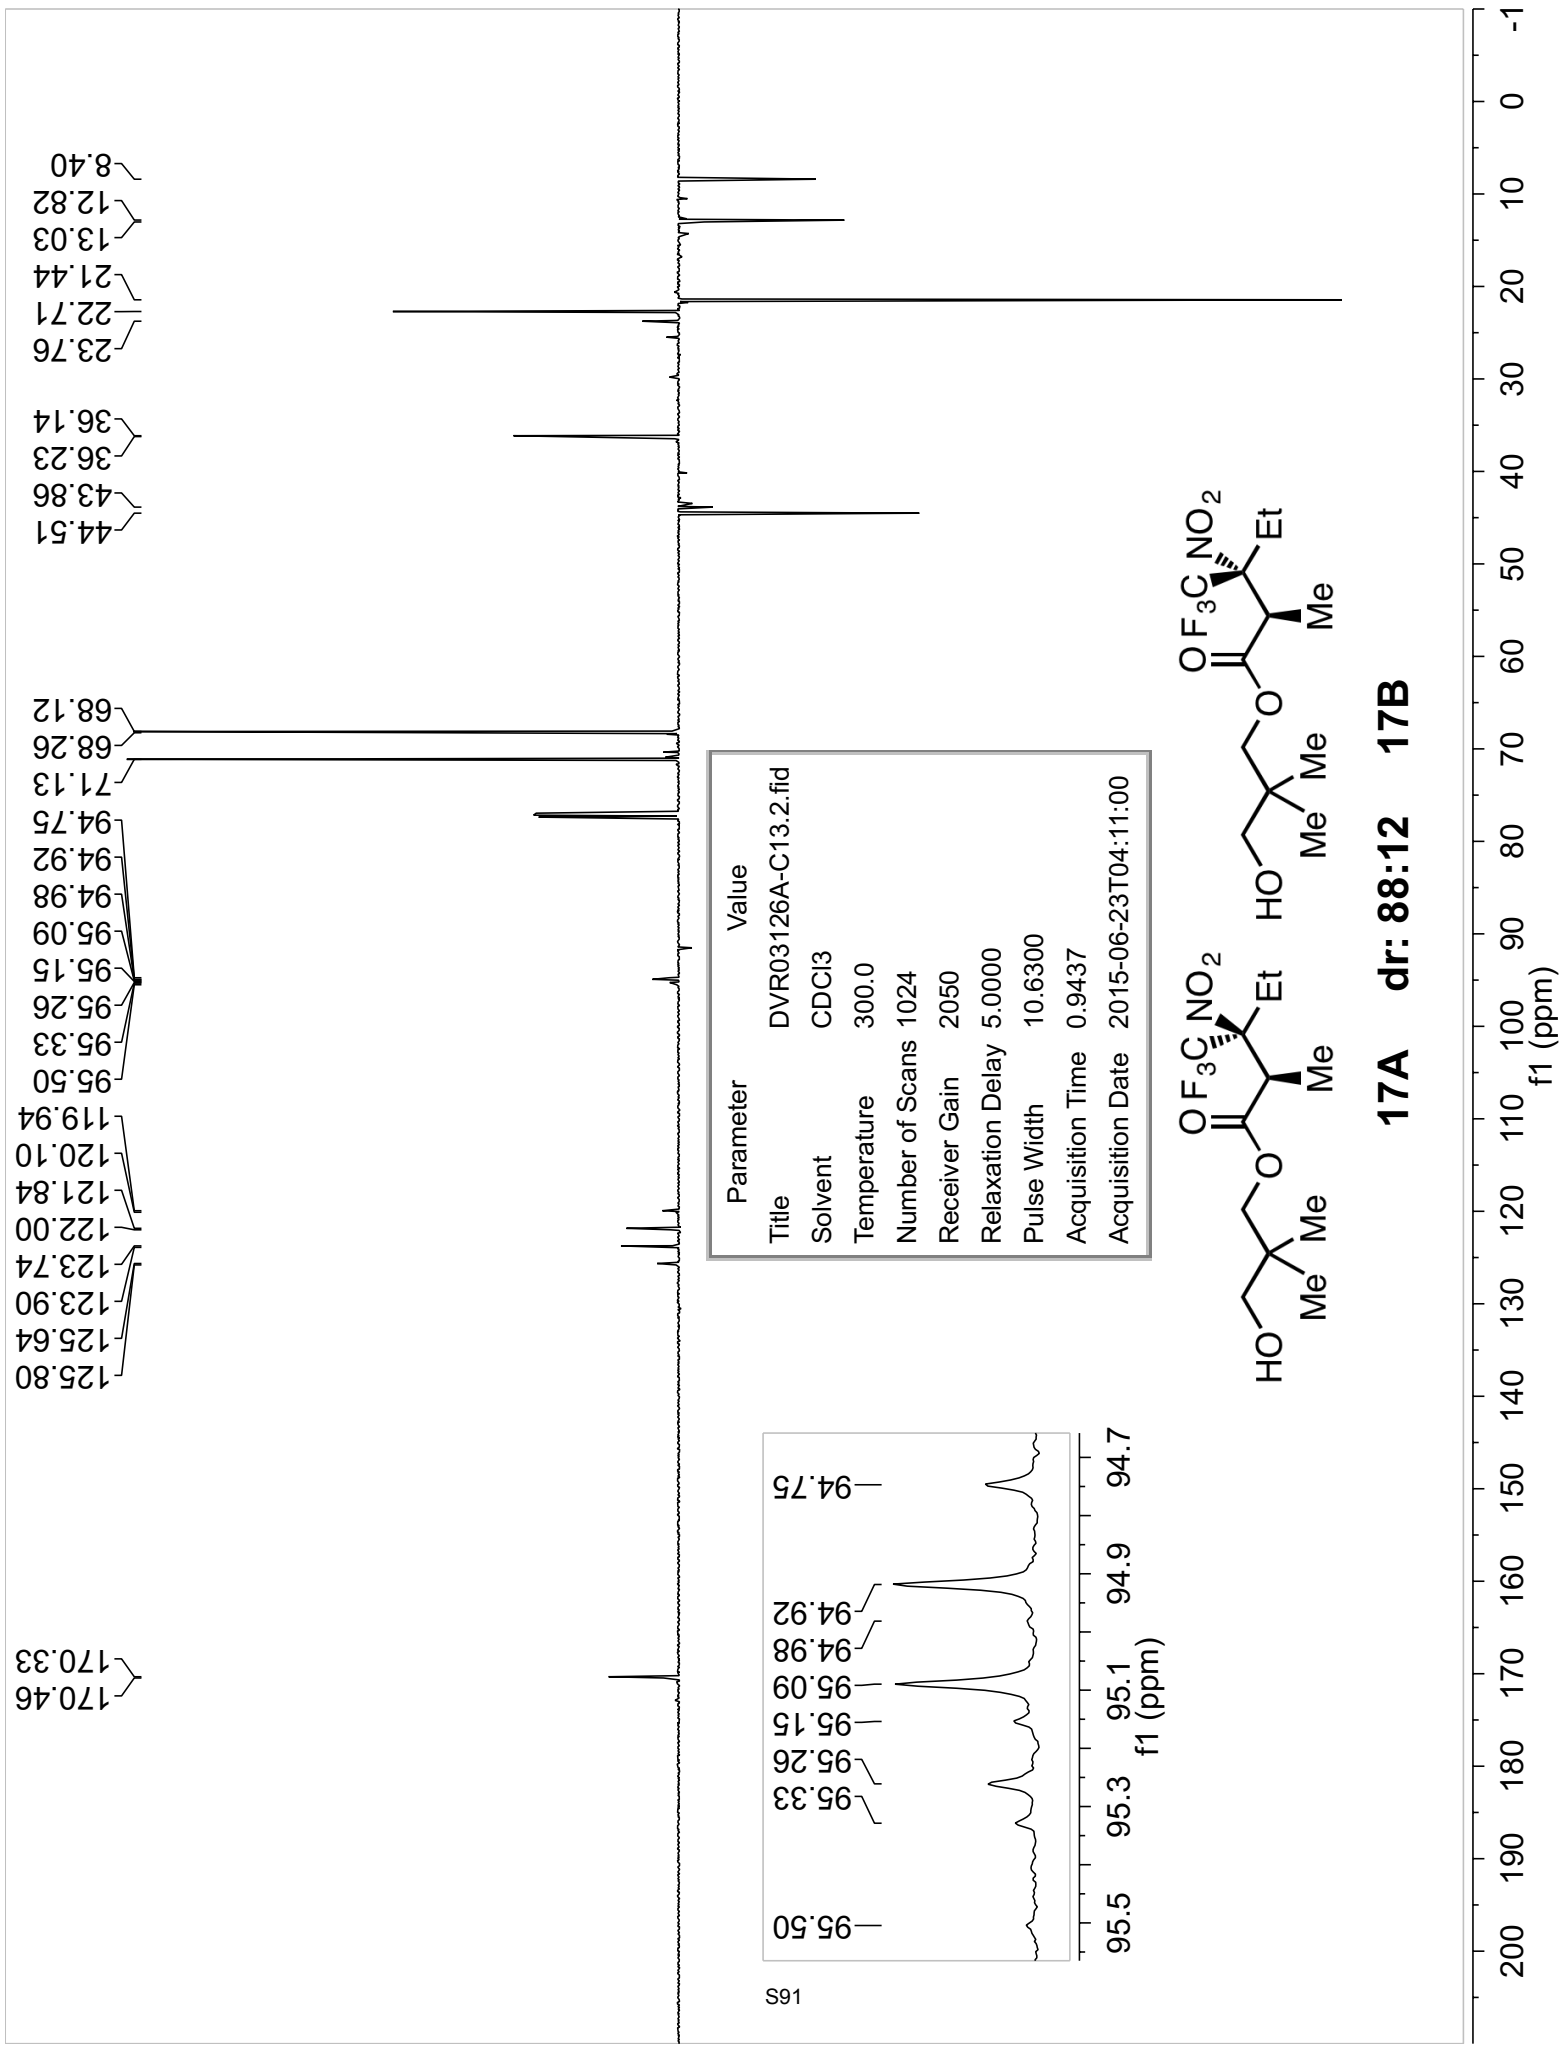

67.07  
66.83

| Parameter        | Value               |
|------------------|---------------------|
| Title            | DVR03126A.2.fid     |
| Solvent          | CDCl3               |
| Temperature      | 300.0               |
| Number of Scans  | 16                  |
| Receiver Gain    | 362                 |
| Relaxation Delay | 3.0000              |
| Pulse Width      | 11.6200             |
| Acquisition Time | 0.4893              |
| Acquisition Date | 2015-06-03T23:55:00 |

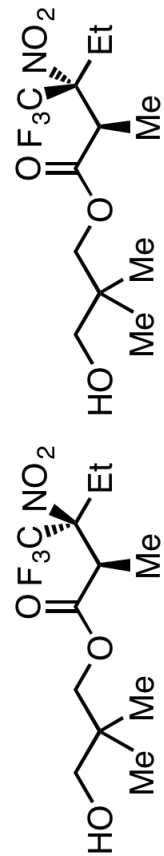

17A dr: 88:12 17B

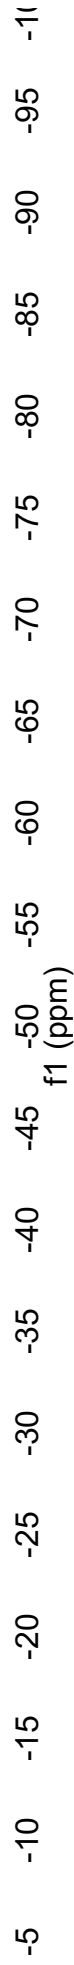

| Parameter                | Value             |
|--------------------------|-------------------|
| 1 Title                  | DVR03122CRD.1.fid |
| 2 Solvent                | CDCl3             |
| 3 Temperature            | 300.0             |
| 4 Number of Scans        | 16                |
| 5 Receiver Gain          | 144               |
| 6 Relaxation Delay       | 1.0000            |
| 7 Pulse Width            | 10.7700           |
| 8 Spectrometer Frequency | 600.32            |
| 9 Nucleus                | <sup>1</sup> H    |

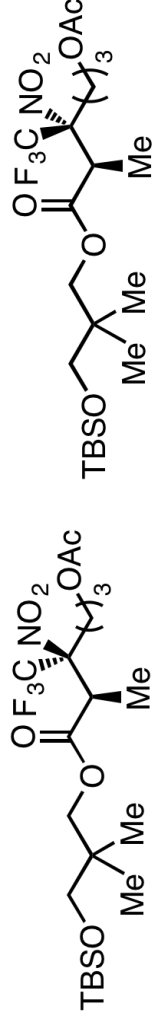

**Crude**  
**18A dr: 85:15 18B**

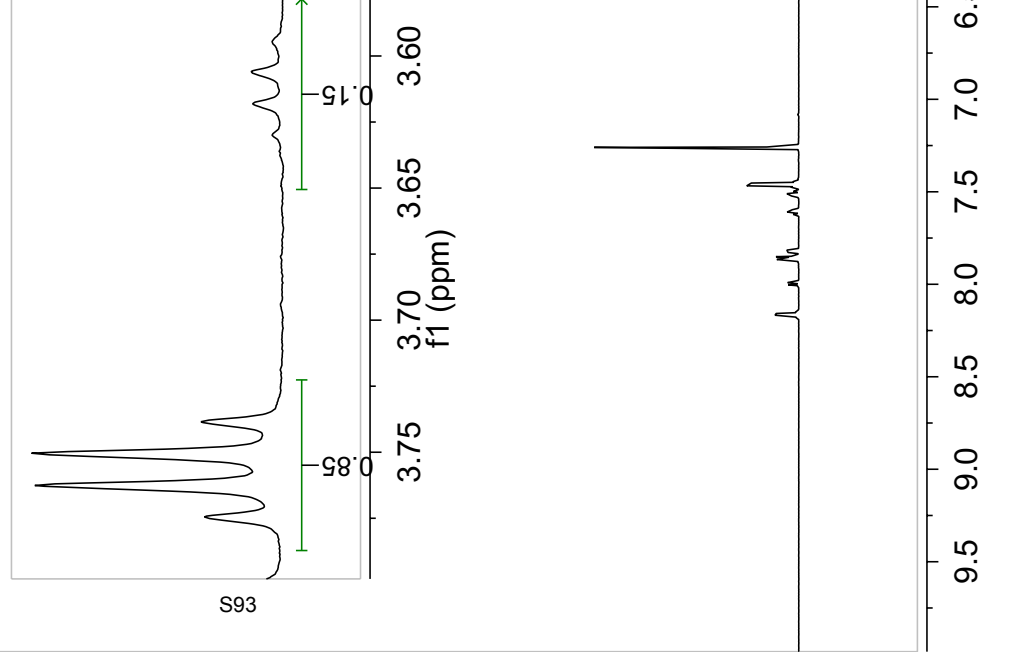

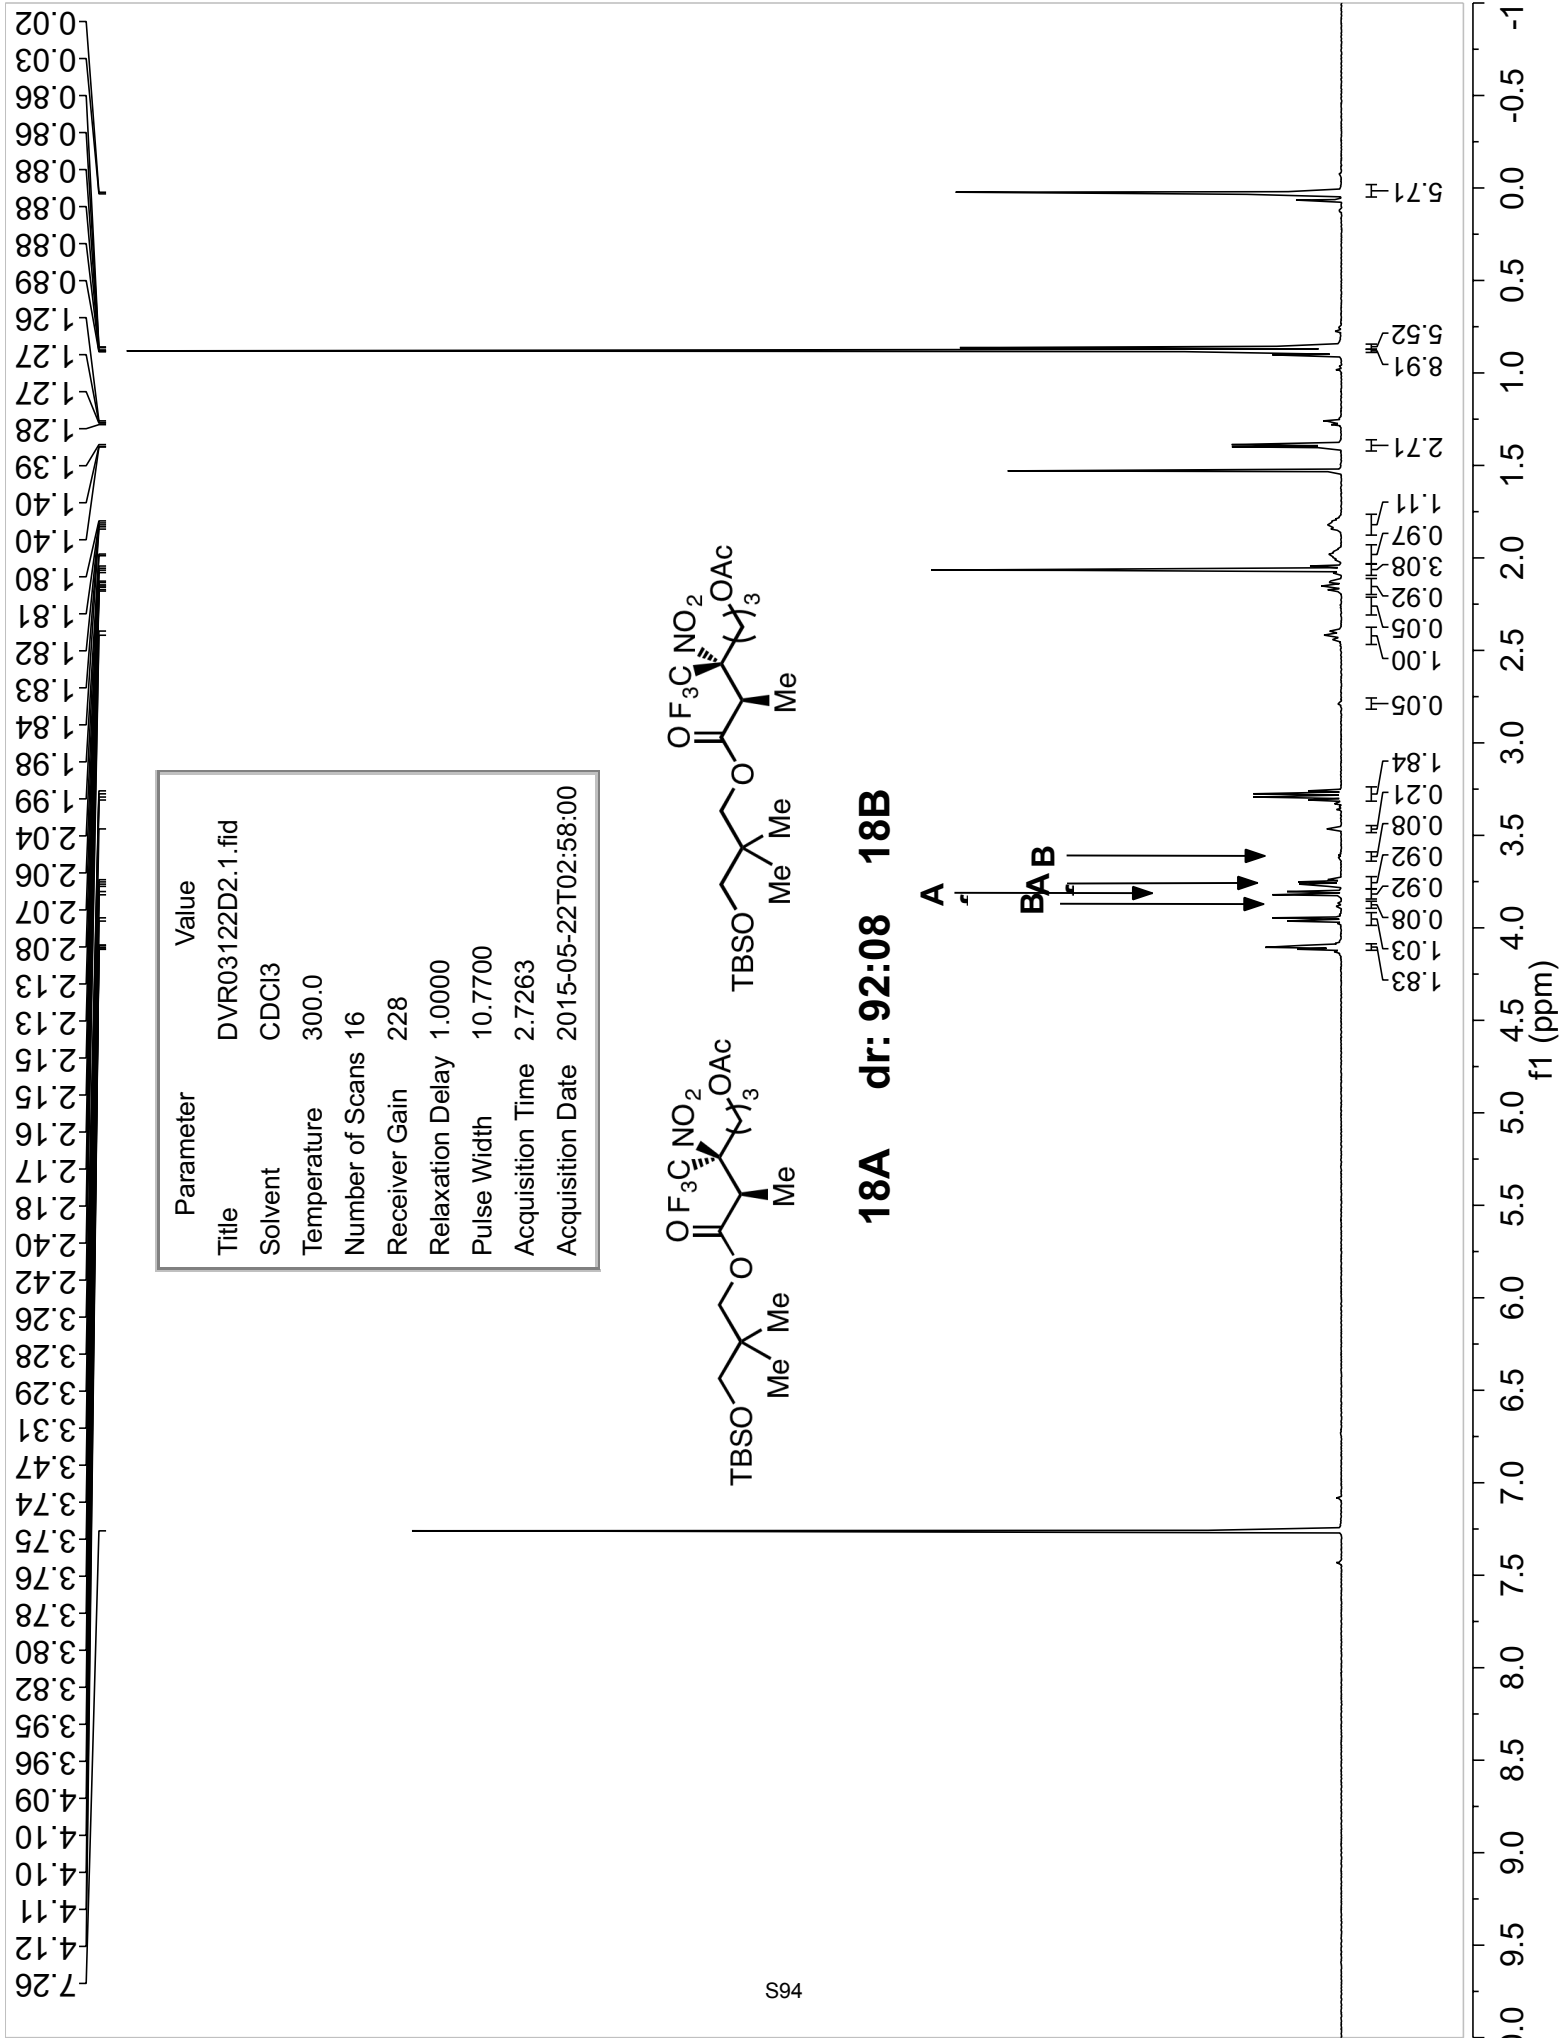

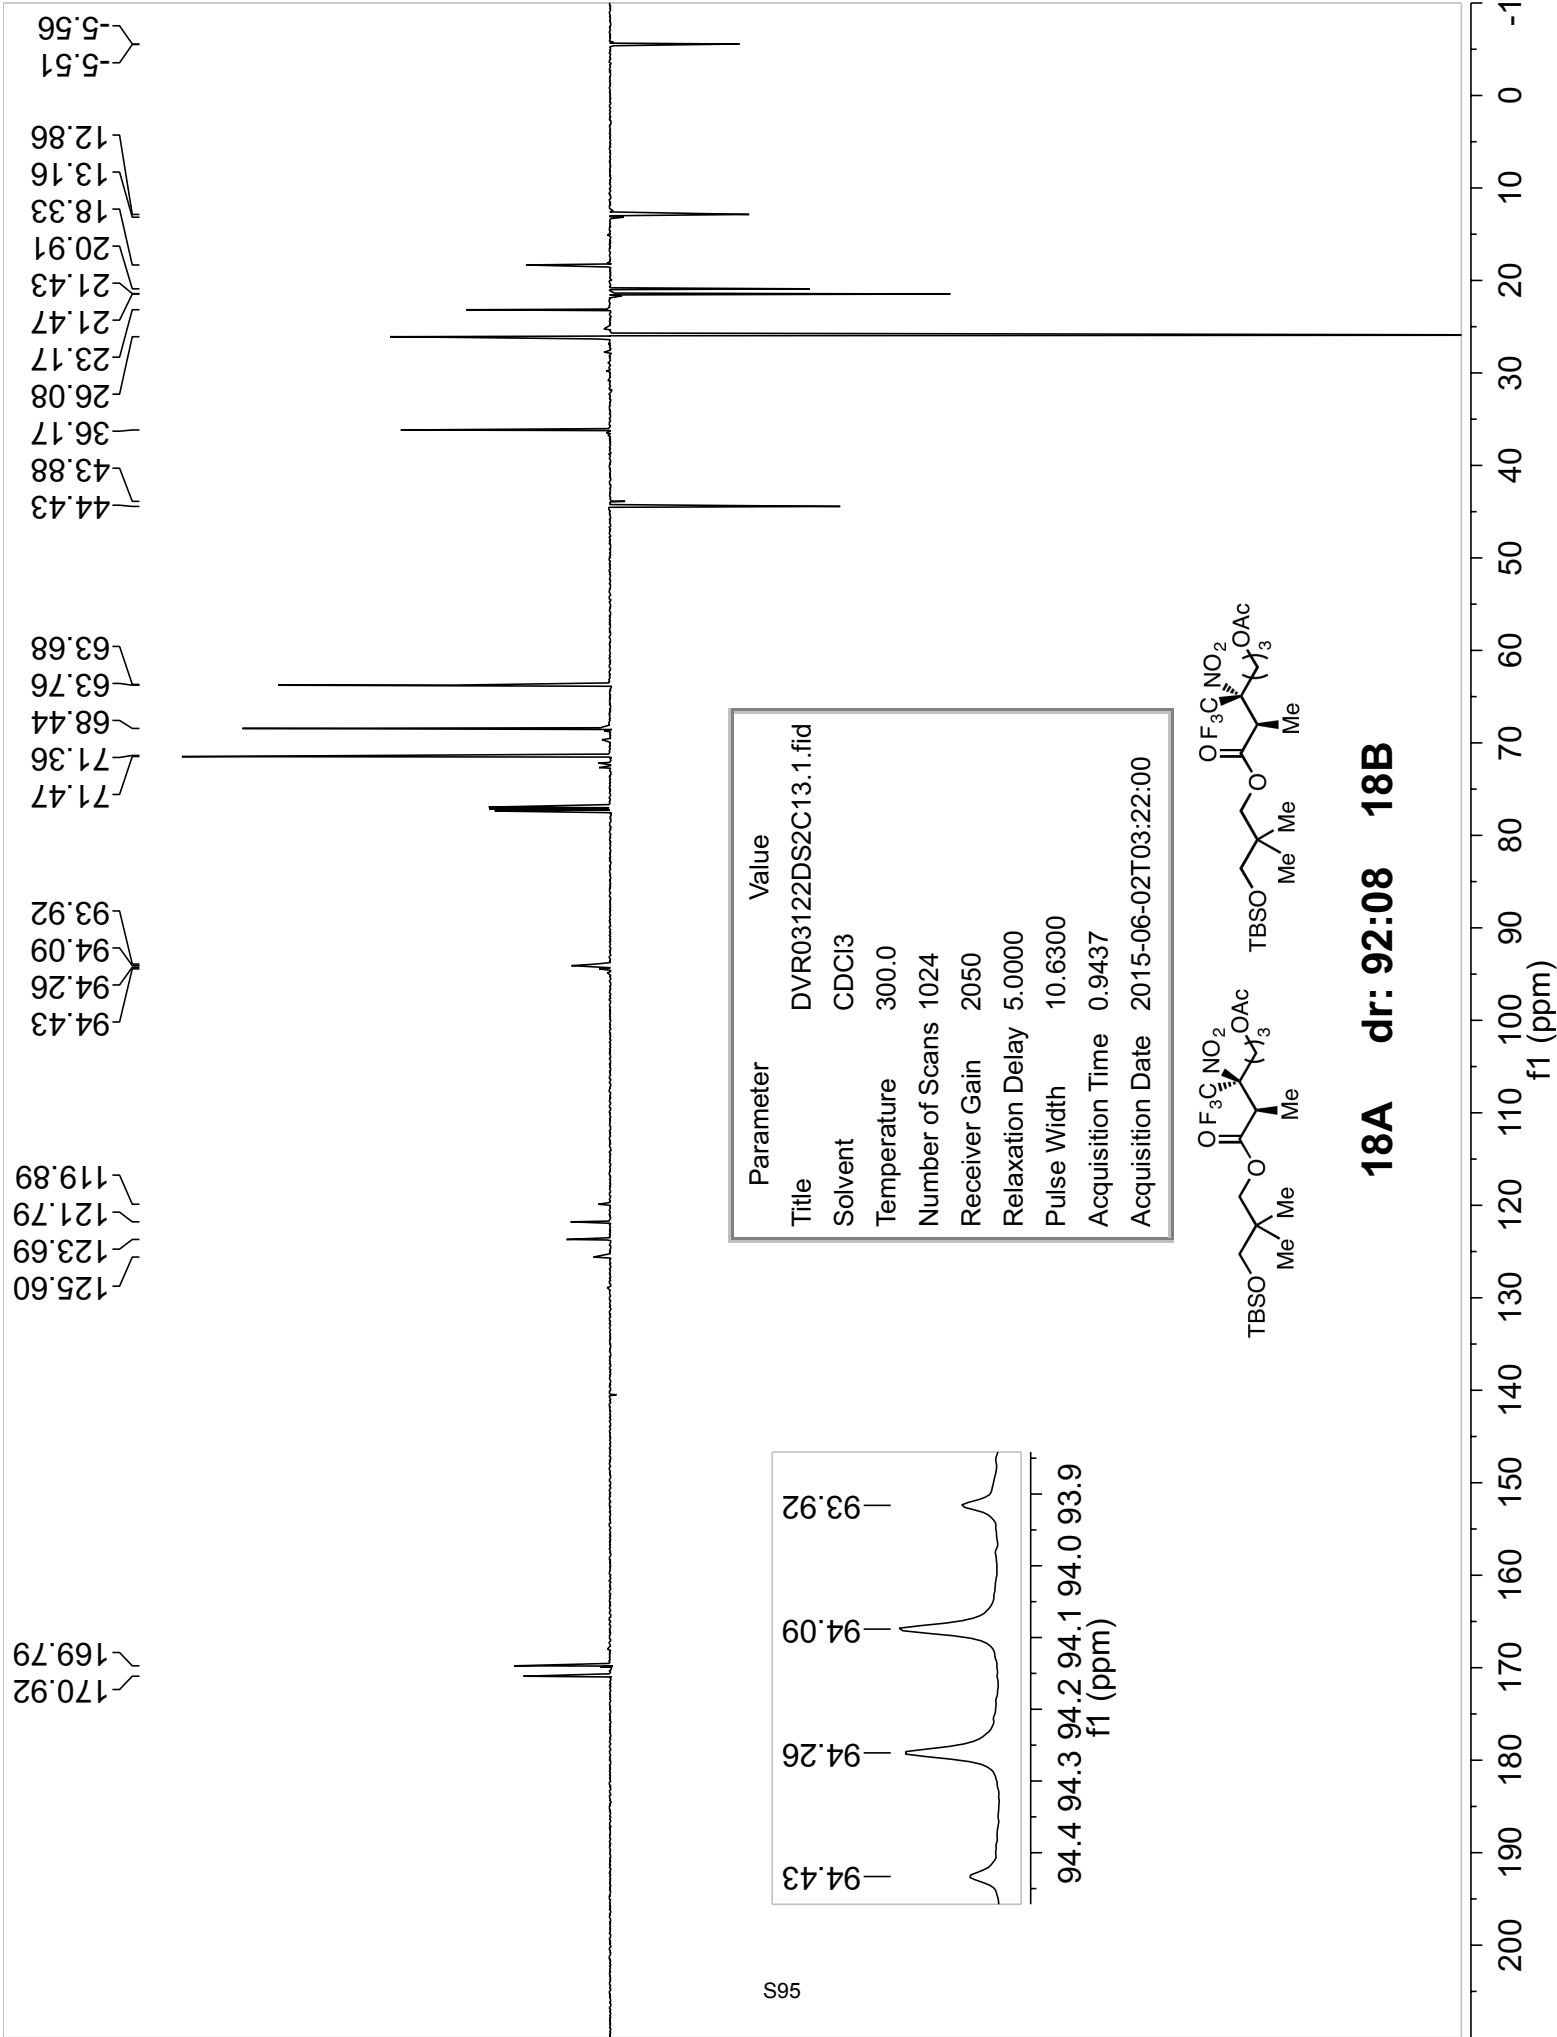

67.22  
67.46

| Parameter        | Value               |
|------------------|---------------------|
| Title            | DVR03122D2.2.fid    |
| Solvent          | CDCl3               |
| Temperature      | 300.0               |
| Number of Scans  | 16                  |
| Receiver Gain    | 362                 |
| Relaxation Delay | 3.0000              |
| Pulse Width      | 11.6200             |
| Acquisition Time | 0.4893              |
| Acquisition Date | 2015-05-22T03:22:00 |

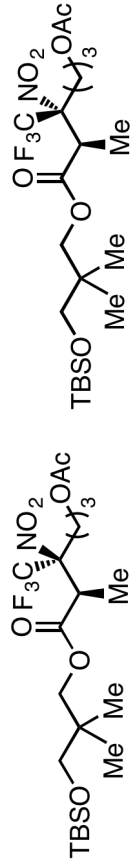

18A dr: 92:08 18B

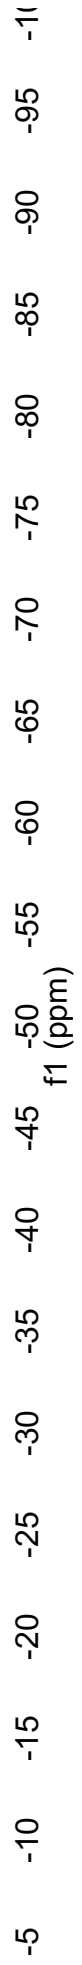



| Parameter                | Value             |
|--------------------------|-------------------|
| 1 Title                  | DVR03108CRD.1.fid |
| 2 Solvent                | CDCI3             |
| 3 Temperature            | 298.2             |
| 4 Number of Scans        | 16                |
| 5 Receiver Gain          | 10                |
| 6 Relaxation Delay       | 1.0000            |
| 7 Pulse Width            | 15.0000           |
| 8 Spectrometer Frequency | 400.13            |
| 9 Nucleus                | <sup>1</sup> H    |

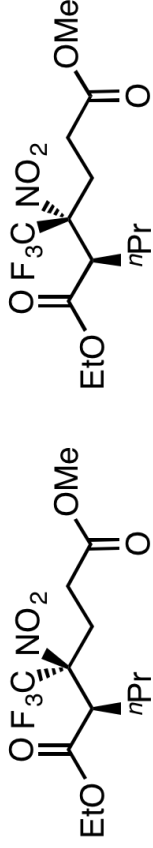

**Crude**  
**19A dr = 67:33 19B**

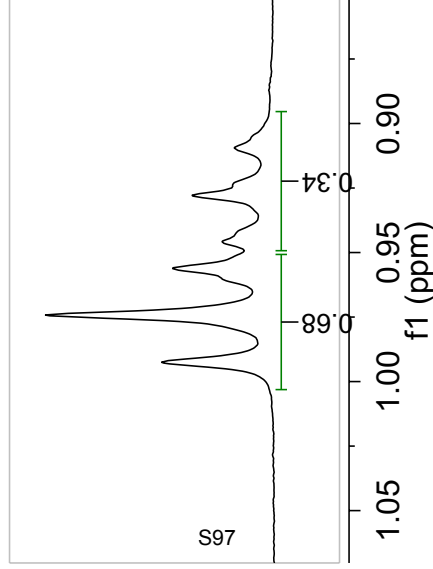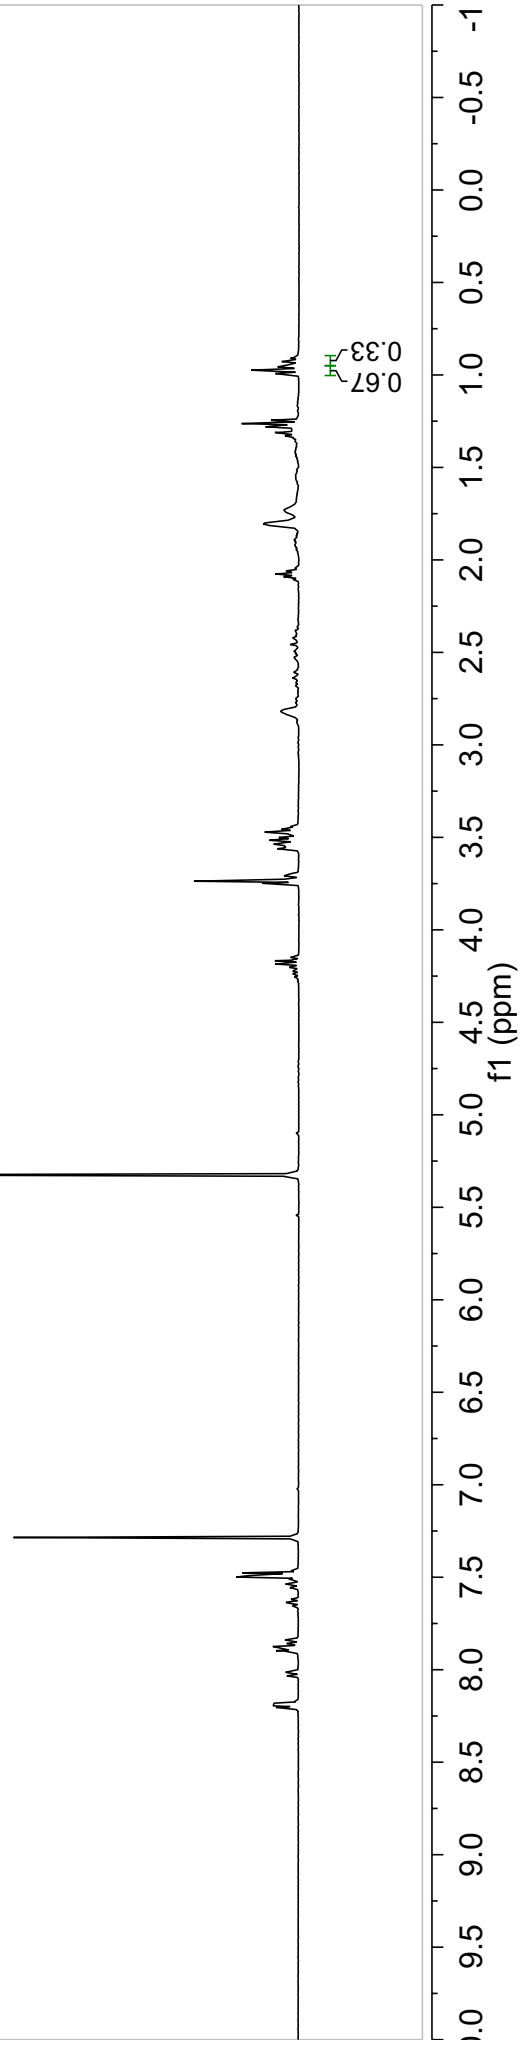

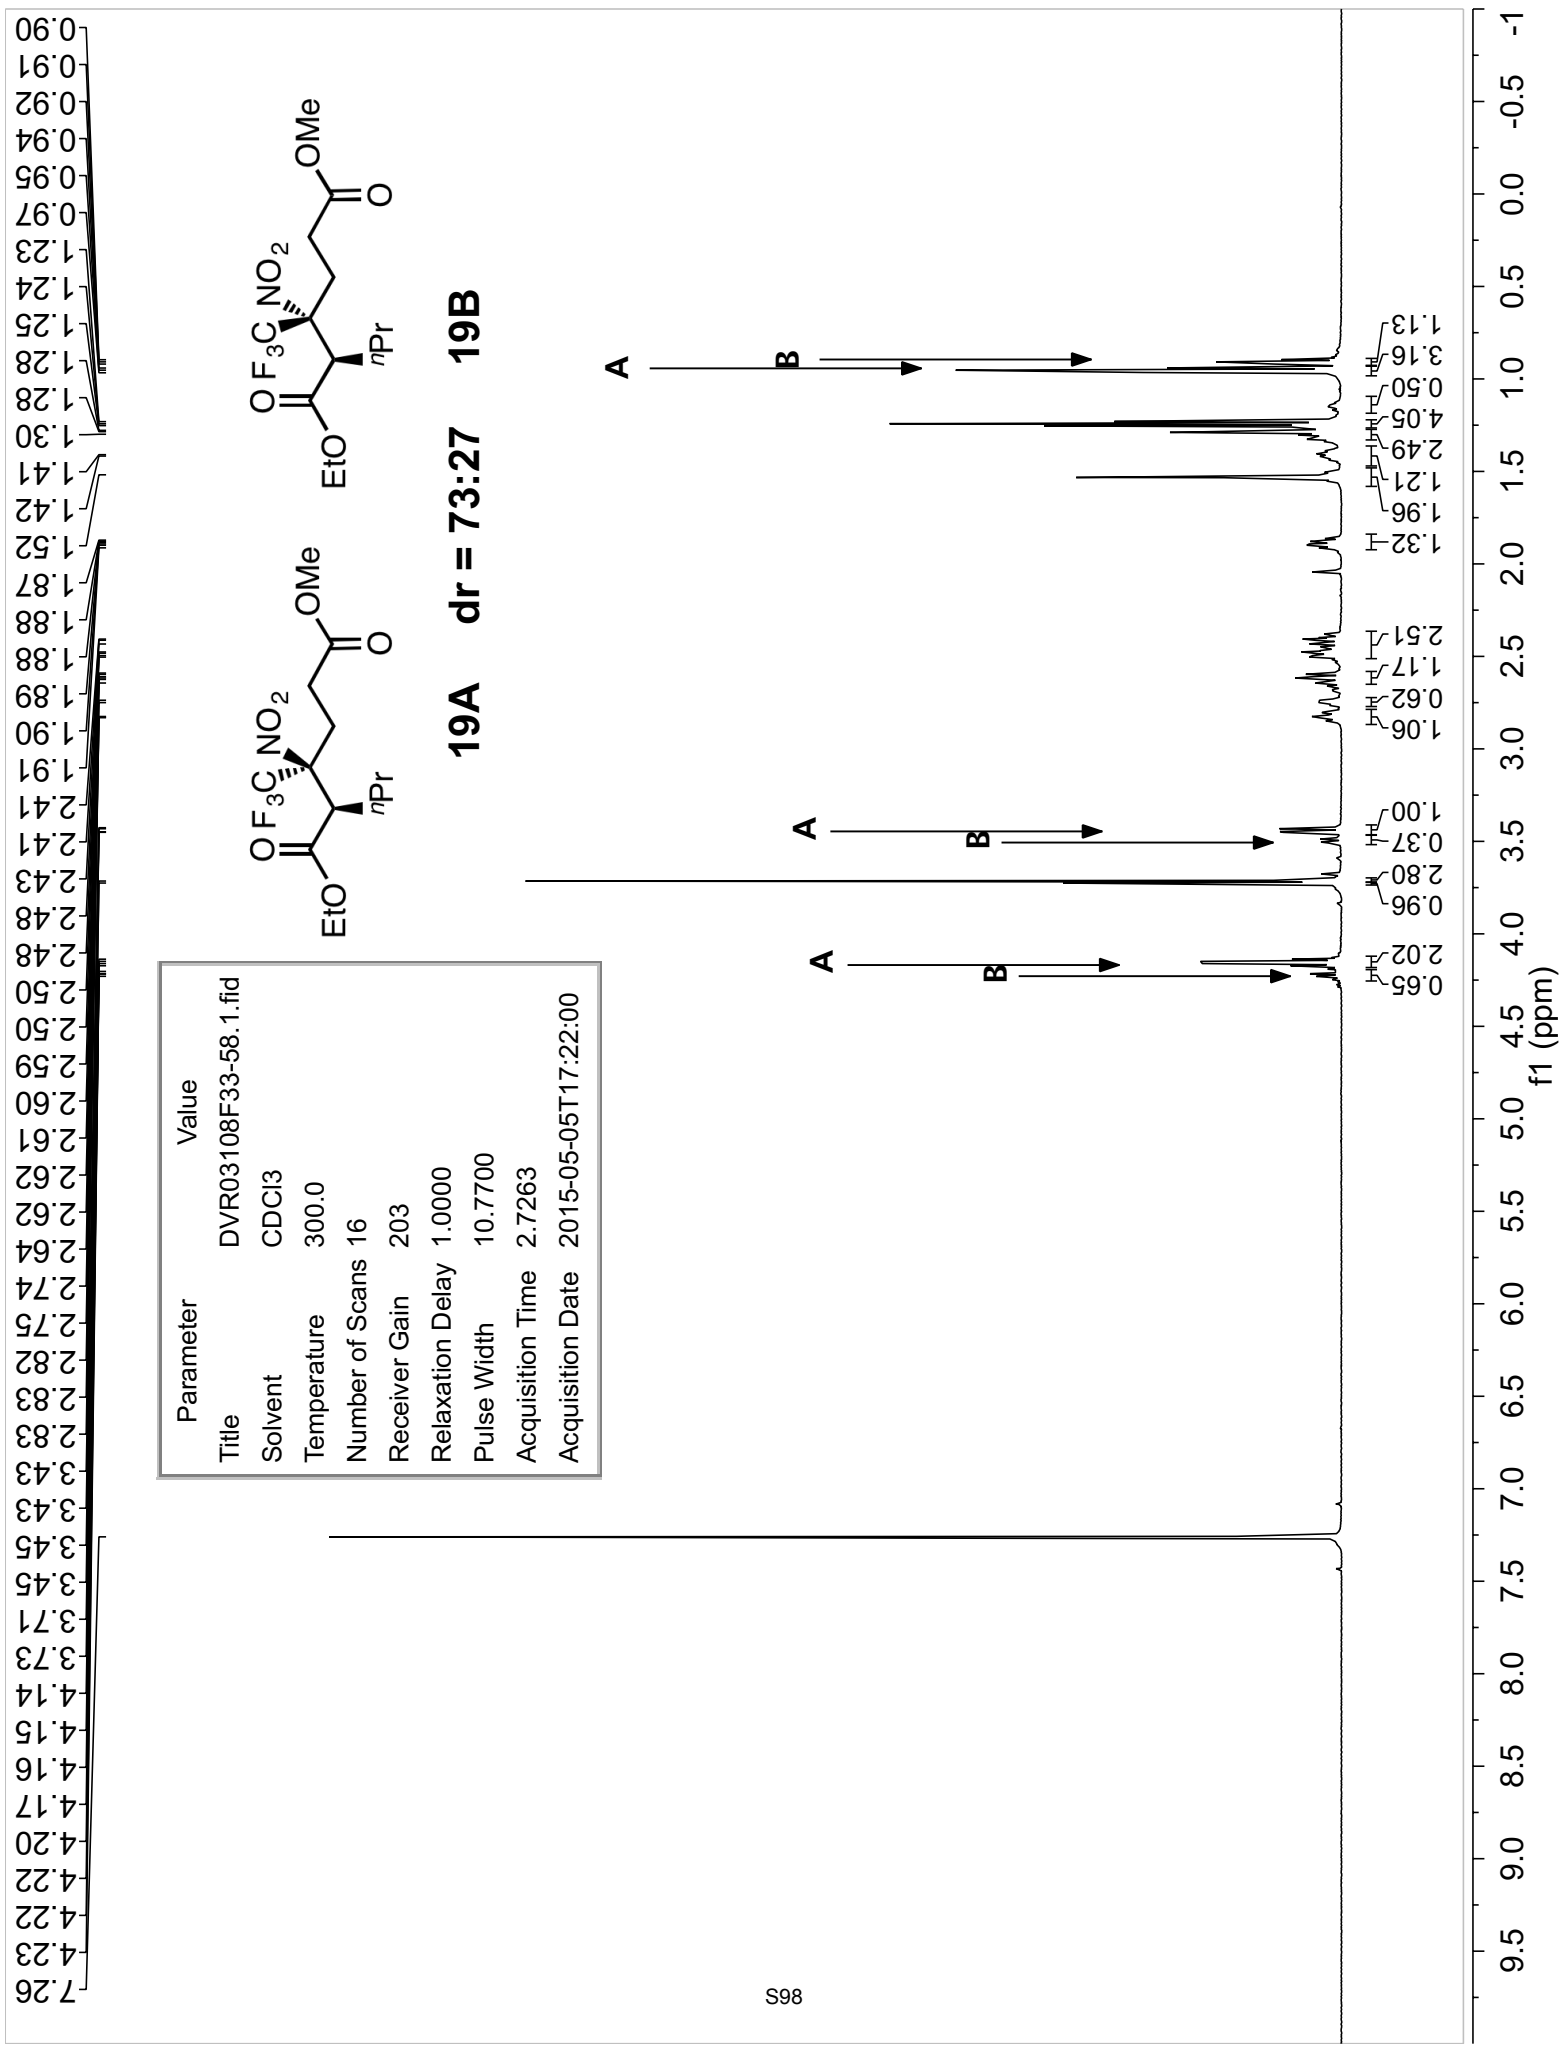

| Parameter        | Value                |
|------------------|----------------------|
| Title            | DVR03108F33-58.1.fid |
| Solvent          | CDCl3                |
| Temperature      | 300.0                |
| Number of Scans  | 16                   |
| Receiver Gain    | 203                  |
| Relaxation Delay | 1.0000               |
| Pulse Width      | 10.7700              |
| Acquisition Time | 2.7263               |
| Acquisition Date | 2015-05-05T17:22:00  |

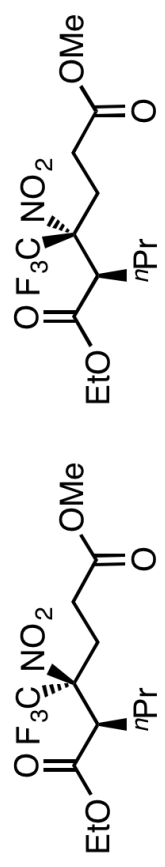

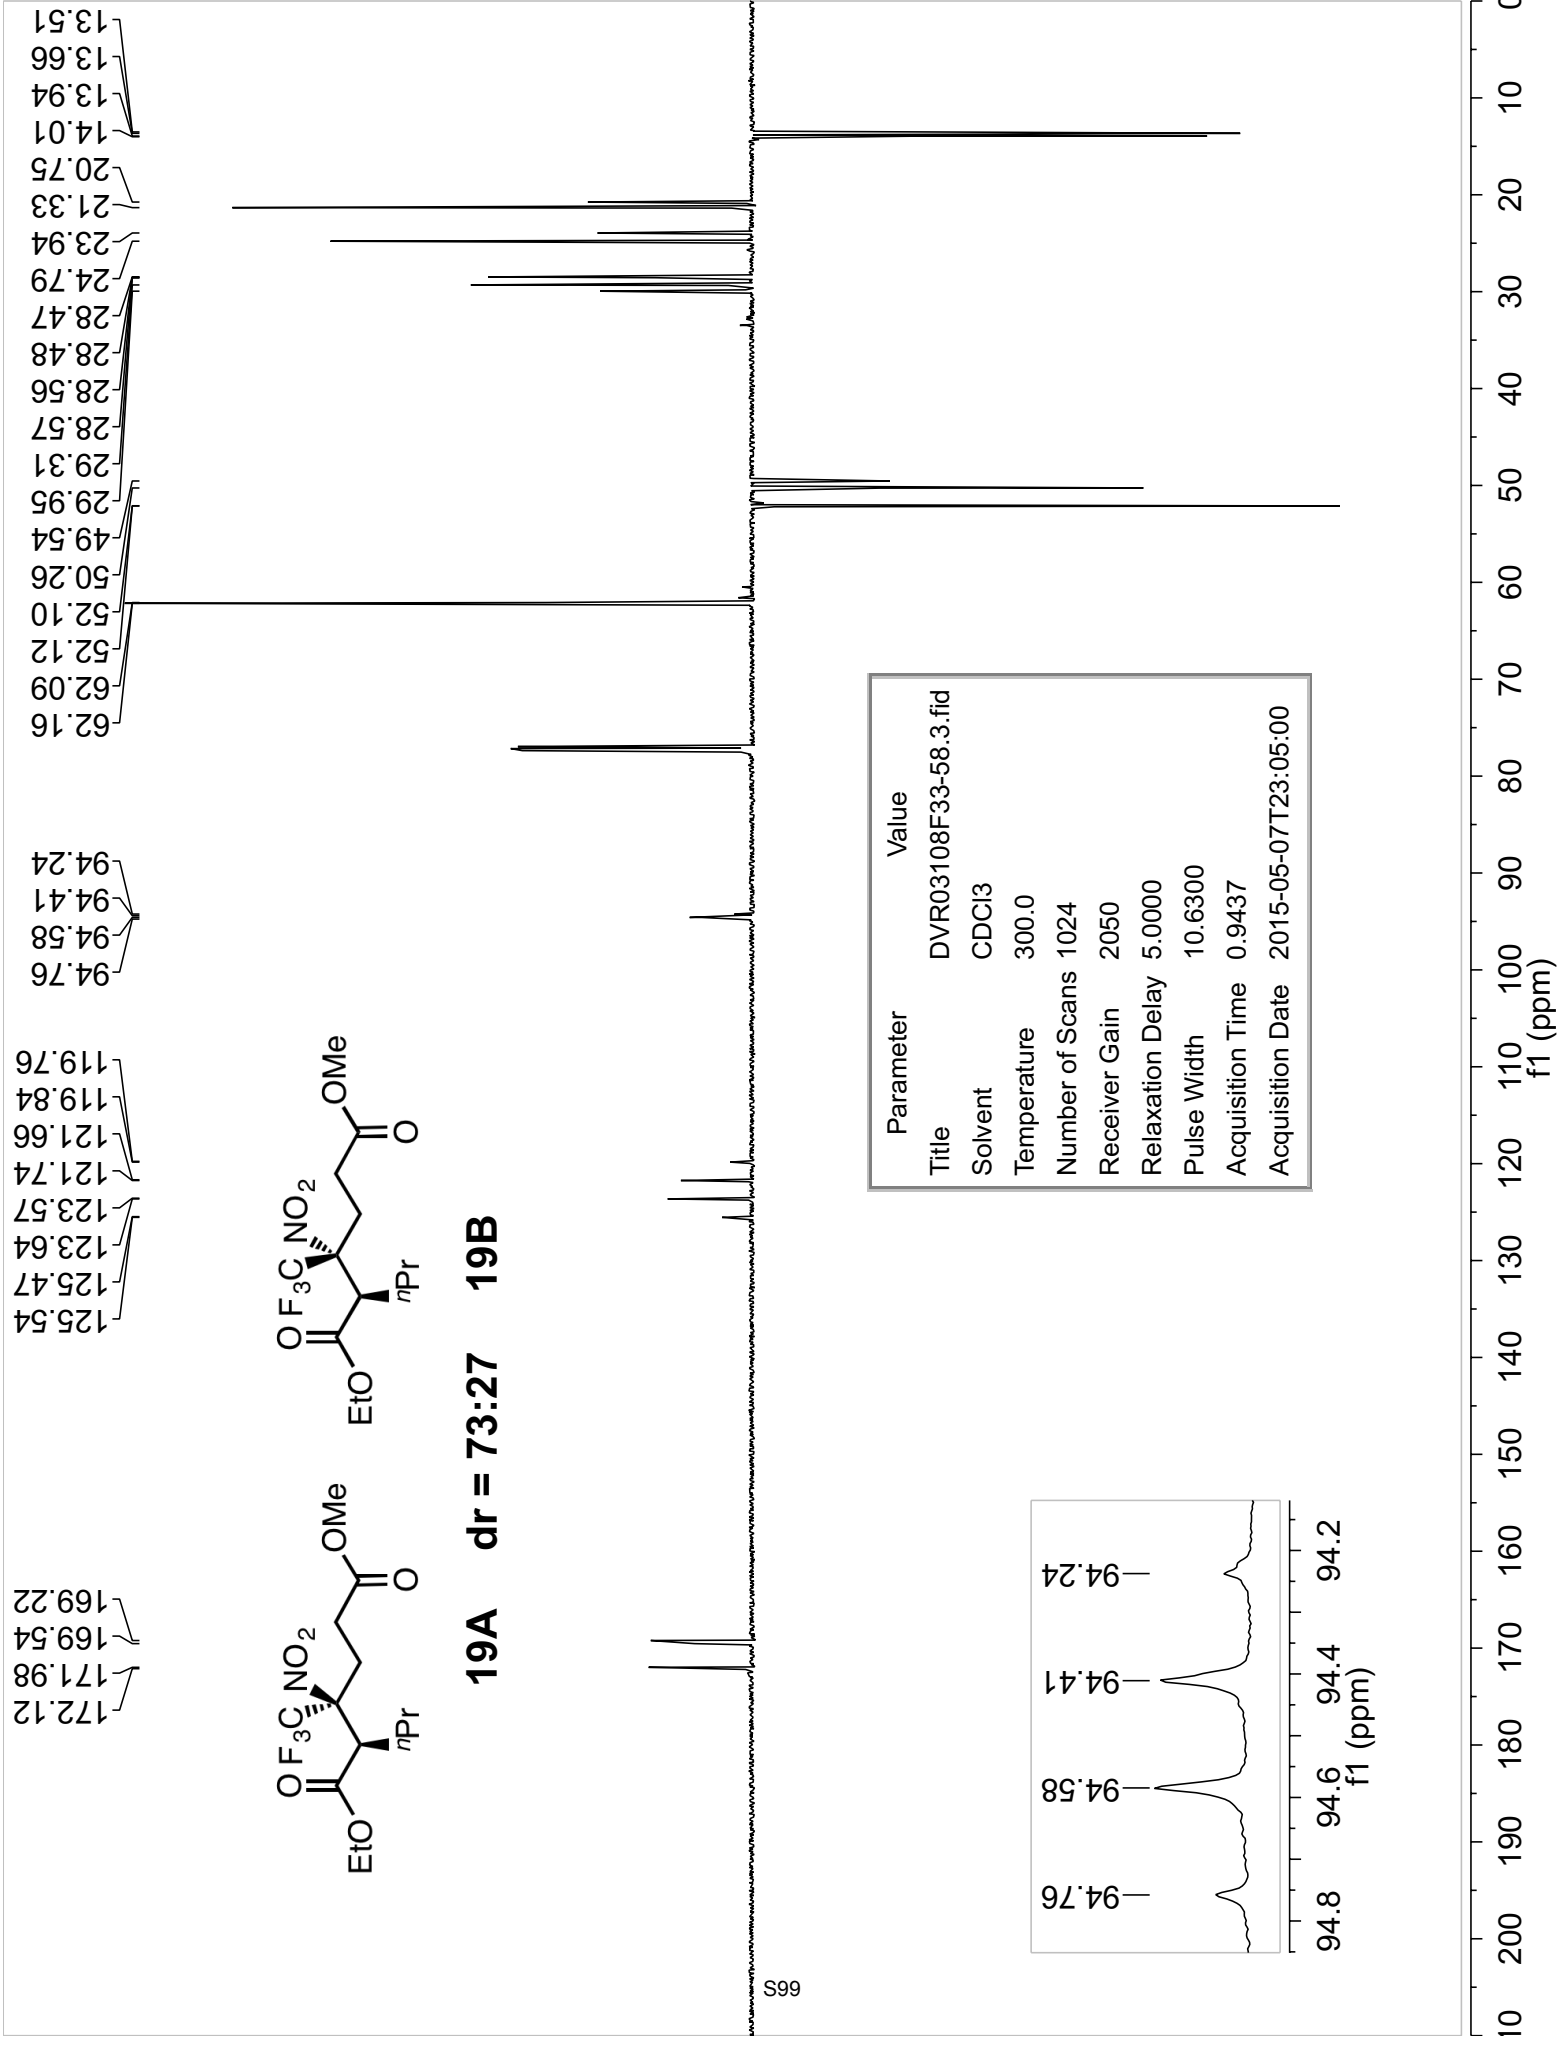

66.18  
68.15

| Parameter        | Value                |
|------------------|----------------------|
| Title            | DVR03108F33-58.2.fid |
| Solvent          | CDCl <sub>3</sub>    |
| Temperature      | 300.0                |
| Number of Scans  | 16                   |
| Receiver Gain    | 362                  |
| Relaxation Delay | 3.0000               |
| Pulse Width      | 11.6200              |
| Acquisition Time | 0.4893               |
| Acquisition Date | 2015-05-05T18:08:00  |

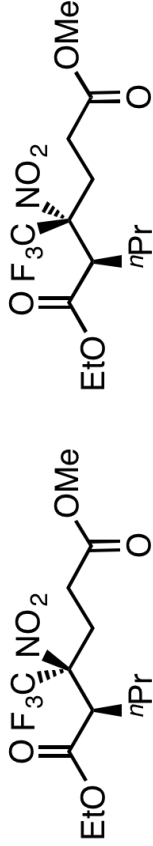

**19A dr = 73:27 19B**

0 -5 -10 -15 -20 -25 -30 -35 -40 -45 -50 -55 -60 -65 -70 -75 -80 -85 -90 -95 -100  
f1 (ppm)

| Parameter                | Value             |
|--------------------------|-------------------|
| 1 Title                  | DVR03127CRD.1.fid |
| 2 Solvent                | CDCl3             |
| 3 Temperature            | 300.0             |
| 4 Number of Scans        | 16                |
| 5 Receiver Gain          | 228               |
| 6 Relaxation Delay       | 1.0000            |
| 7 Pulse Width            | 10.7700           |
| 8 Spectrometer Frequency | 600.32            |
| 9 Nucleus                | <sup>1</sup> H    |

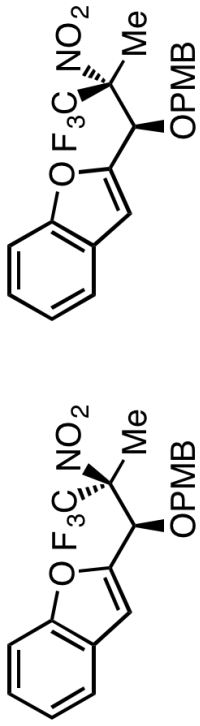

**Crude**  
**20A dr: 89:11 20B**

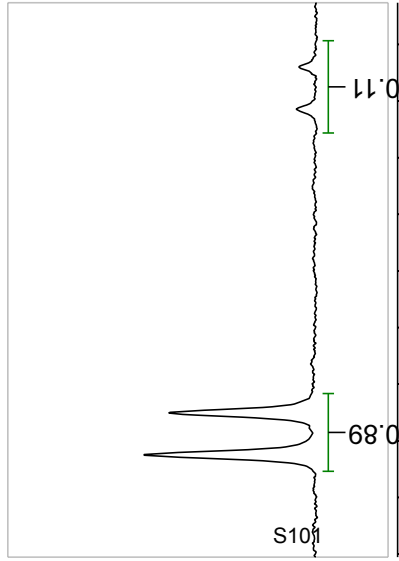

4.45 4.40 4.35 4.30 4.25  
 f1 (ppm)

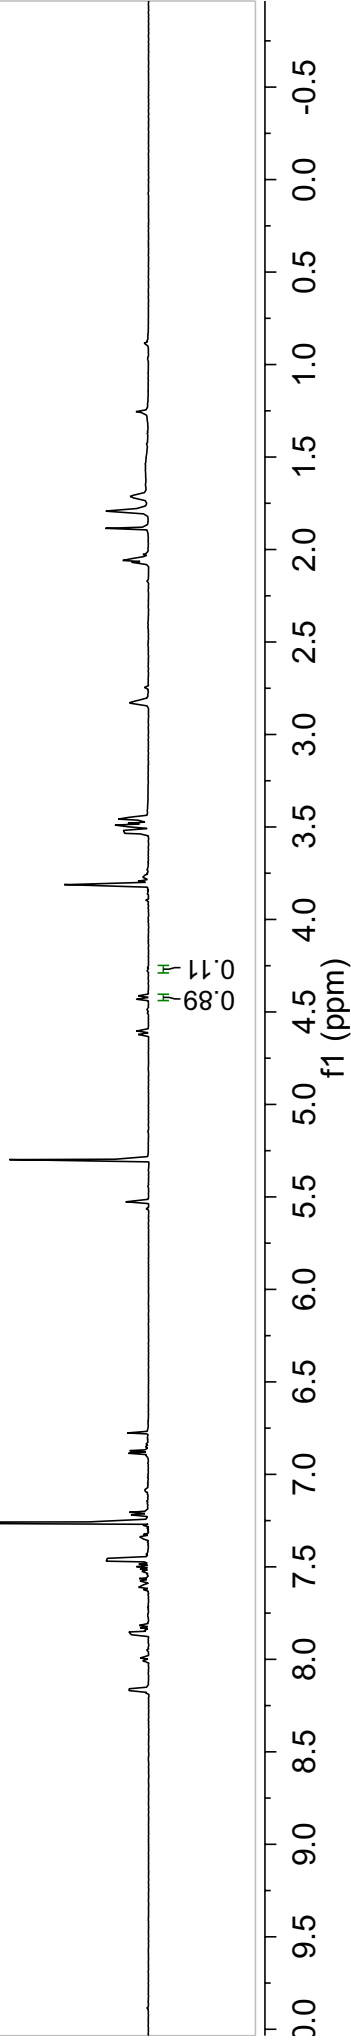

0.88  
 0.88  
 0.11  
 0.11

3.0 9.5 9.0 8.5 8.0 7.5 7.0 6.5 6.0 5.5 5.0 4.5 4.0 3.5 3.0 2.5 2.0 1.5 1.0 0.5 0.0 -0.5  
 f1 (ppm)



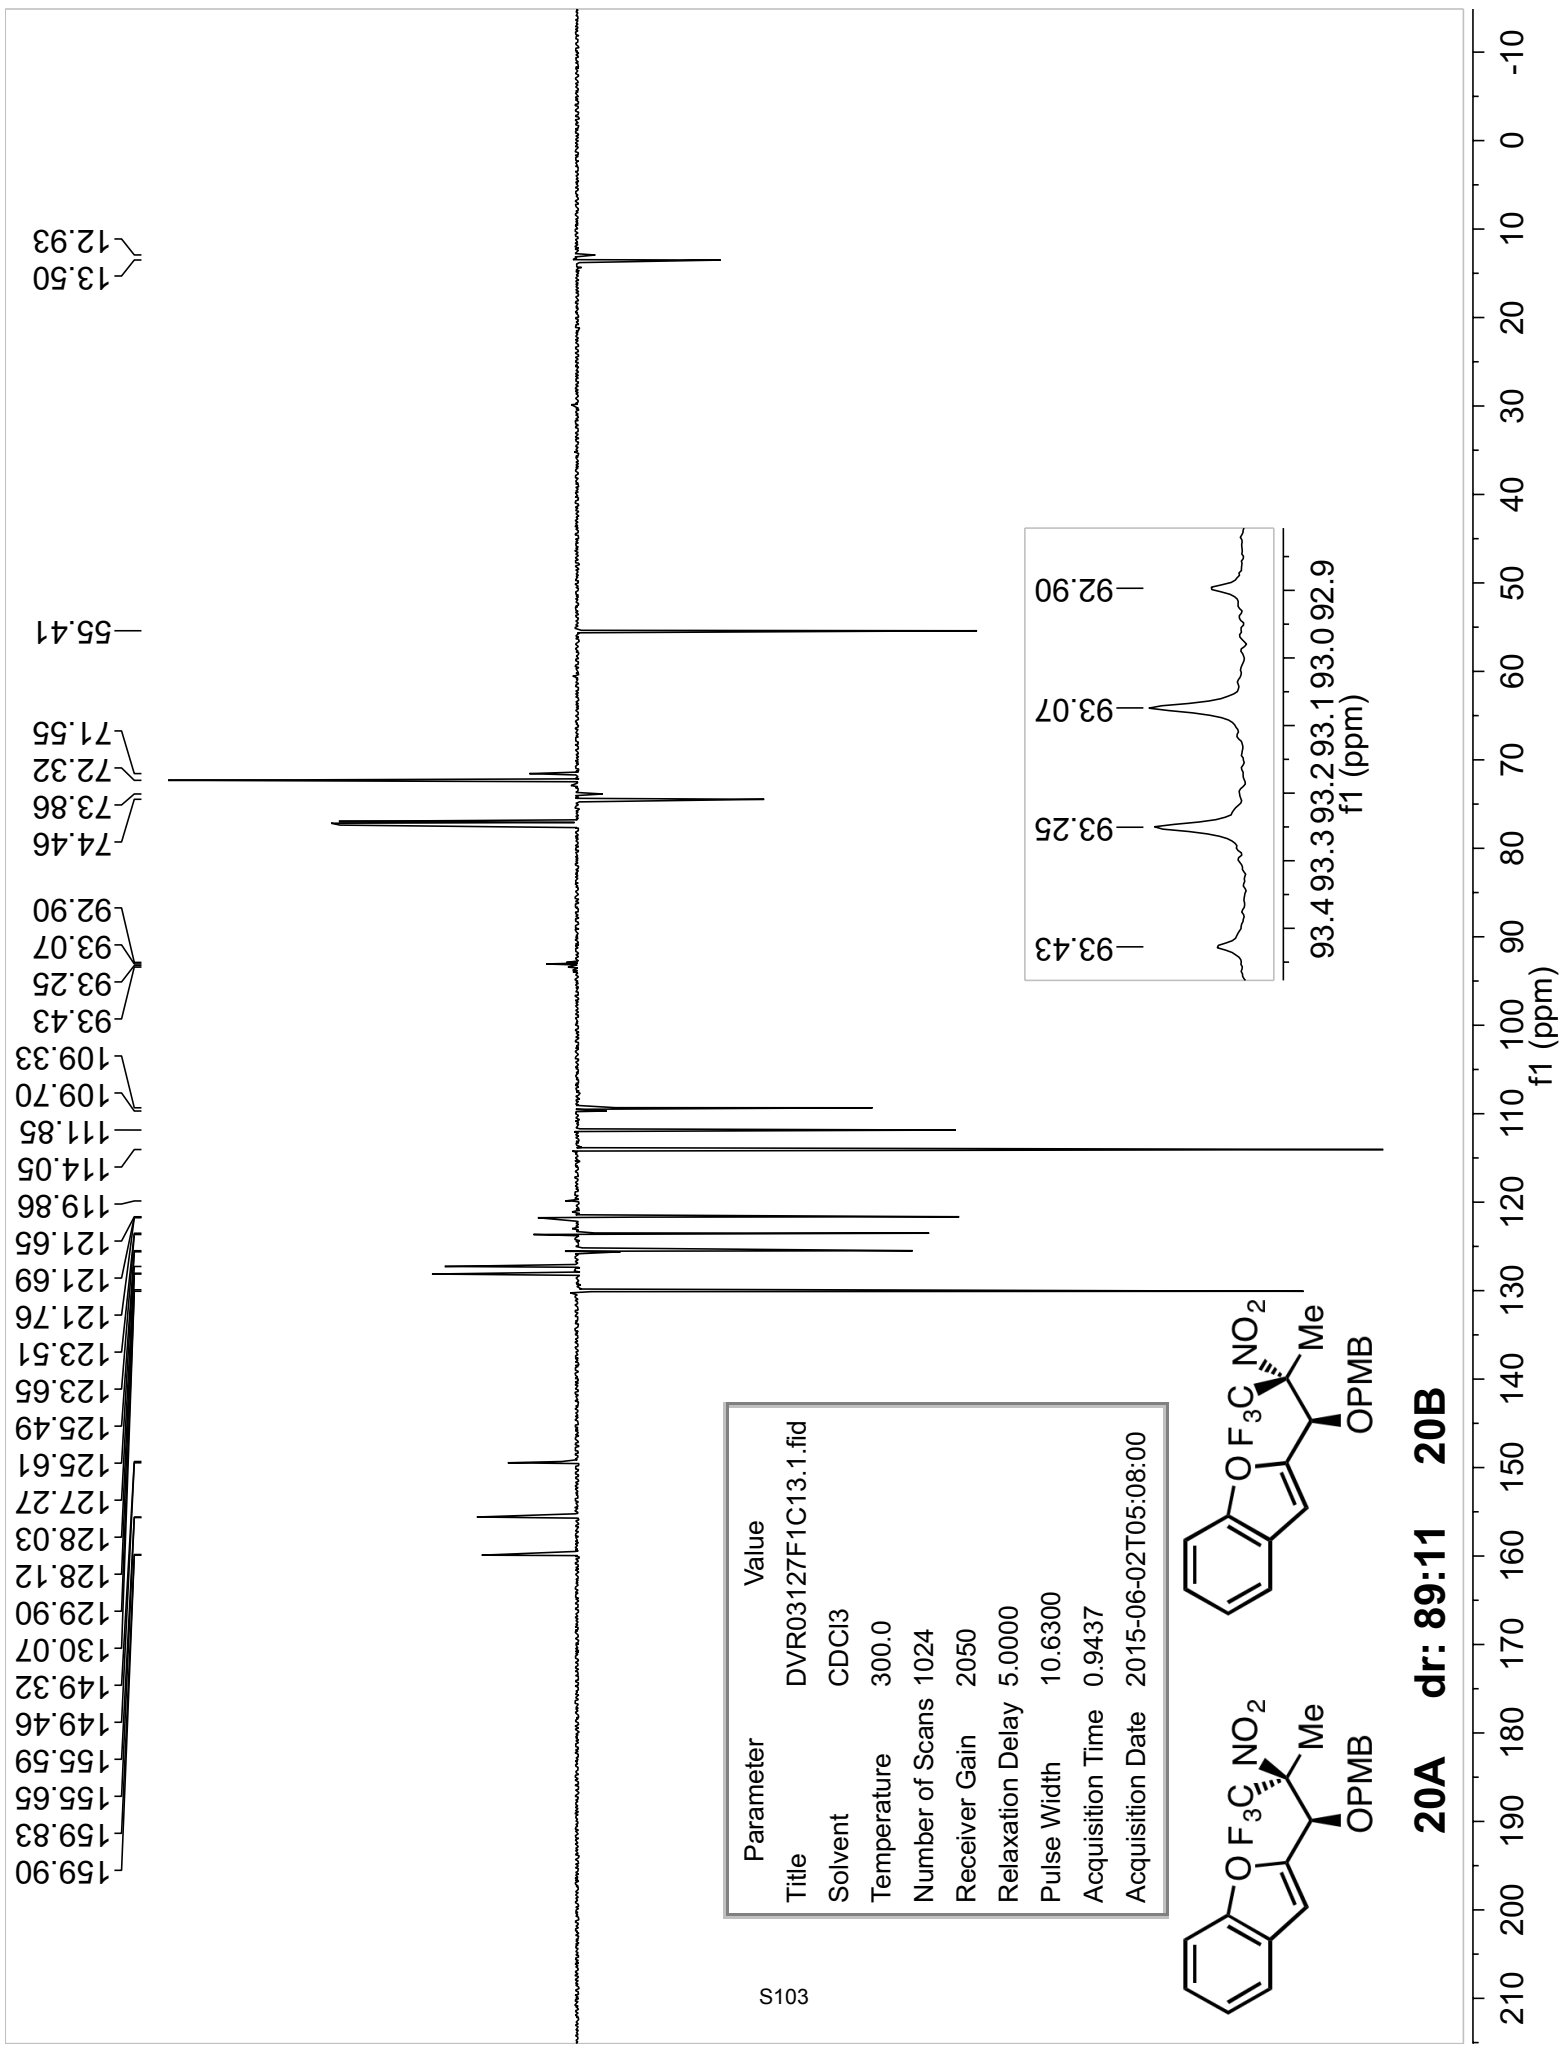

| Parameter        | Value               |
|------------------|---------------------|
| Title            | DVR03127F1C13.1.fid |
| Solvent          | CDCl3               |
| Temperature      | 300.0               |
| Number of Scans  | 1024                |
| Receiver Gain    | 2050                |
| Relaxation Delay | 5.0000              |
| Pulse Width      | 10.6300             |
| Acquisition Time | 0.9437              |
| Acquisition Date | 2015-06-02T05:08:00 |

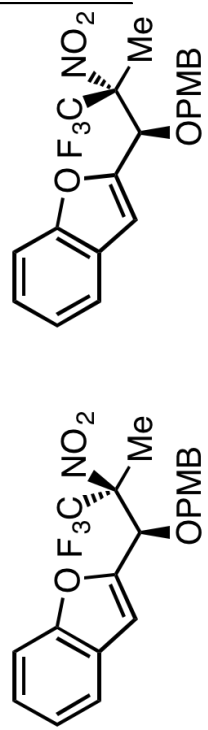

**20A dr: 89:11 20B**

-72.05  
-73.16

| Parameter        | Value               |
|------------------|---------------------|
| Title            | DVR03127F1.3.fid    |
| Solvent          | CDCl3               |
| Temperature      | 300.0               |
| Number of Scans  | 16                  |
| Receiver Gain    | 362                 |
| Relaxation Delay | 3.0000              |
| Pulse Width      | 11.6200             |
| Acquisition Time | 0.4893              |
| Acquisition Date | 2015-05-26T02:12:00 |

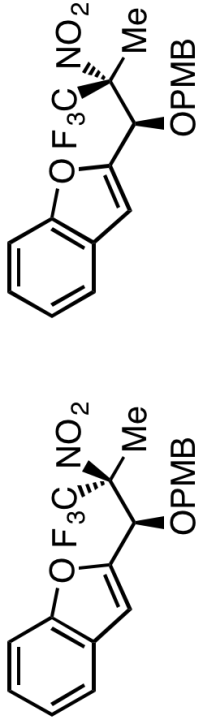

20A dr: 89:11 20B





7.57  
7.54  
7.41  
7.39  
7.26  
3.35  
3.34  
3.32  
3.31  
2.68  
2.65  
2.44  
2.43  
2.40  
2.40  
2.37  
2.36  
2.34  
2.33  
2.09  
2.07  
2.05  
2.04  
2.04  
2.02  
2.01  
1.99  
1.98  
1.98  
1.91  
1.90  
1.89  
1.87  
1.86  
1.85  
1.84  
1.82  
1.81  
1.80  
1.79  
1.78  
1.76  
1.75  
1.57  
1.56  
1.55  
1.54  
1.53  
1.52  
1.51  
1.50  
1.49  
1.48  
1.47  
1.45

| Parameter        | Value               |
|------------------|---------------------|
| Title            | AAG-07275-B         |
| Solvent          | CDCl3               |
| Temperature      | 298.2               |
| Number of Scans  | 16                  |
| Receiver Gain    | 6                   |
| Relaxation Delay | 1.0000              |
| Pulse Width      | 15.0000             |
| Acquisition Time | 3.9584              |
| Acquisition Date | 2015-04-28T18:33:00 |
| Frequency        | 400.13              |
| Nucleus          | 1H                  |

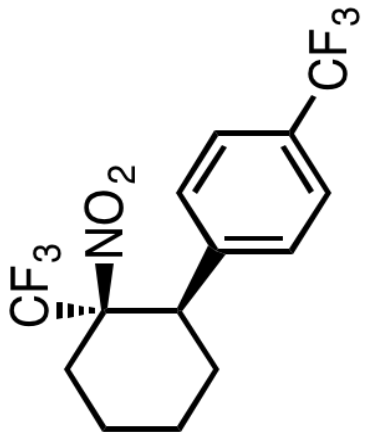

21

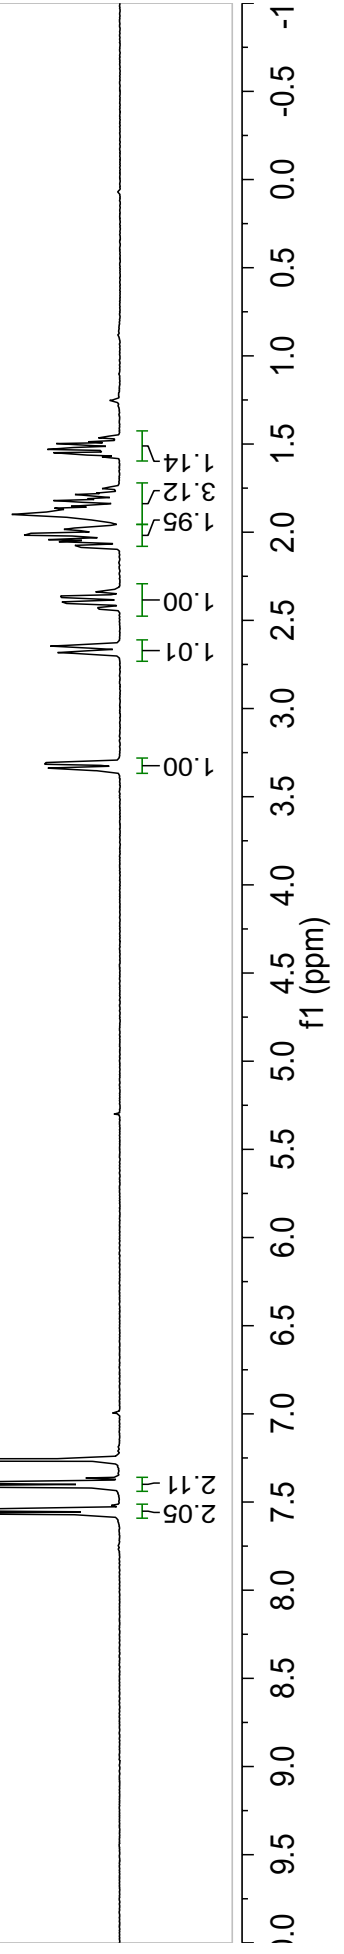

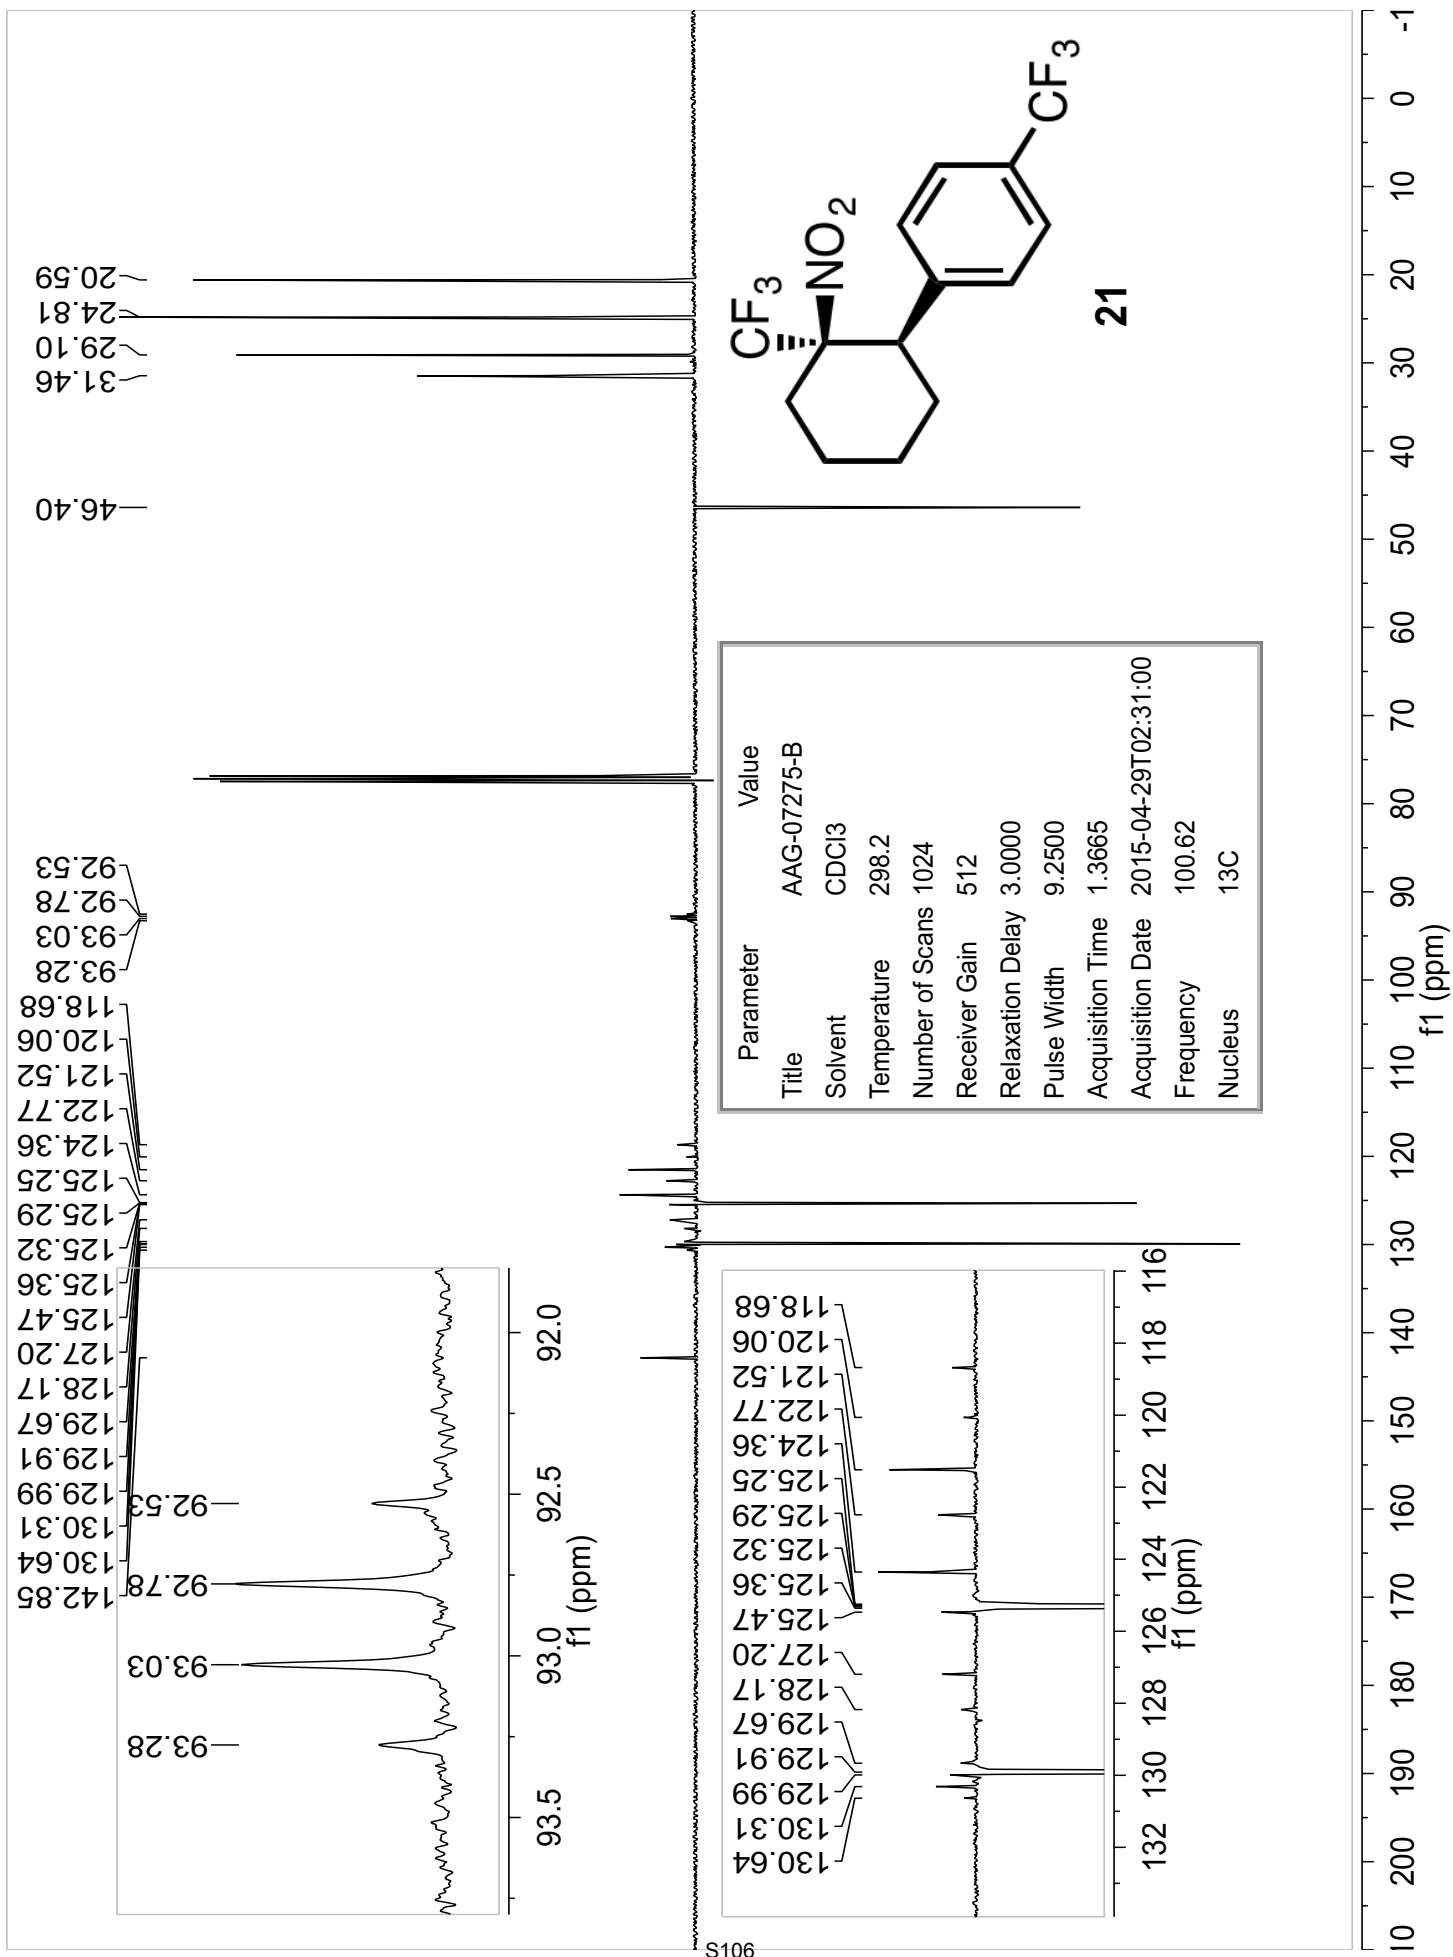

| Parameter        | Value               |
|------------------|---------------------|
| Title            | AAG-07275-B         |
| Solvent          | CDCl <sub>3</sub>   |
| Temperature      | 298.2               |
| Number of Scans  | 16                  |
| Receiver Gain    | 575                 |
| Relaxation Delay | 2.0000              |
| Pulse Width      | 15.0300             |
| Acquisition Time | 0.8717              |
| Acquisition Date | 2015-04-29T03:04:00 |
| Frequency        | 376.46              |
| Nucleus          | <sup>19</sup> F     |

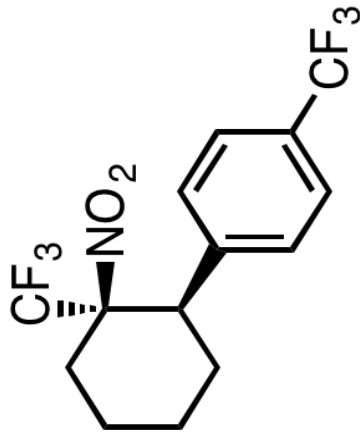

21

-62.67

-70.86

-5 -10 -15 -20 -25 -30 -35 -40 -45 -50 -55 -60 -65 -70 -75 -80 -85 -90 -95 -100

f1 (ppm)

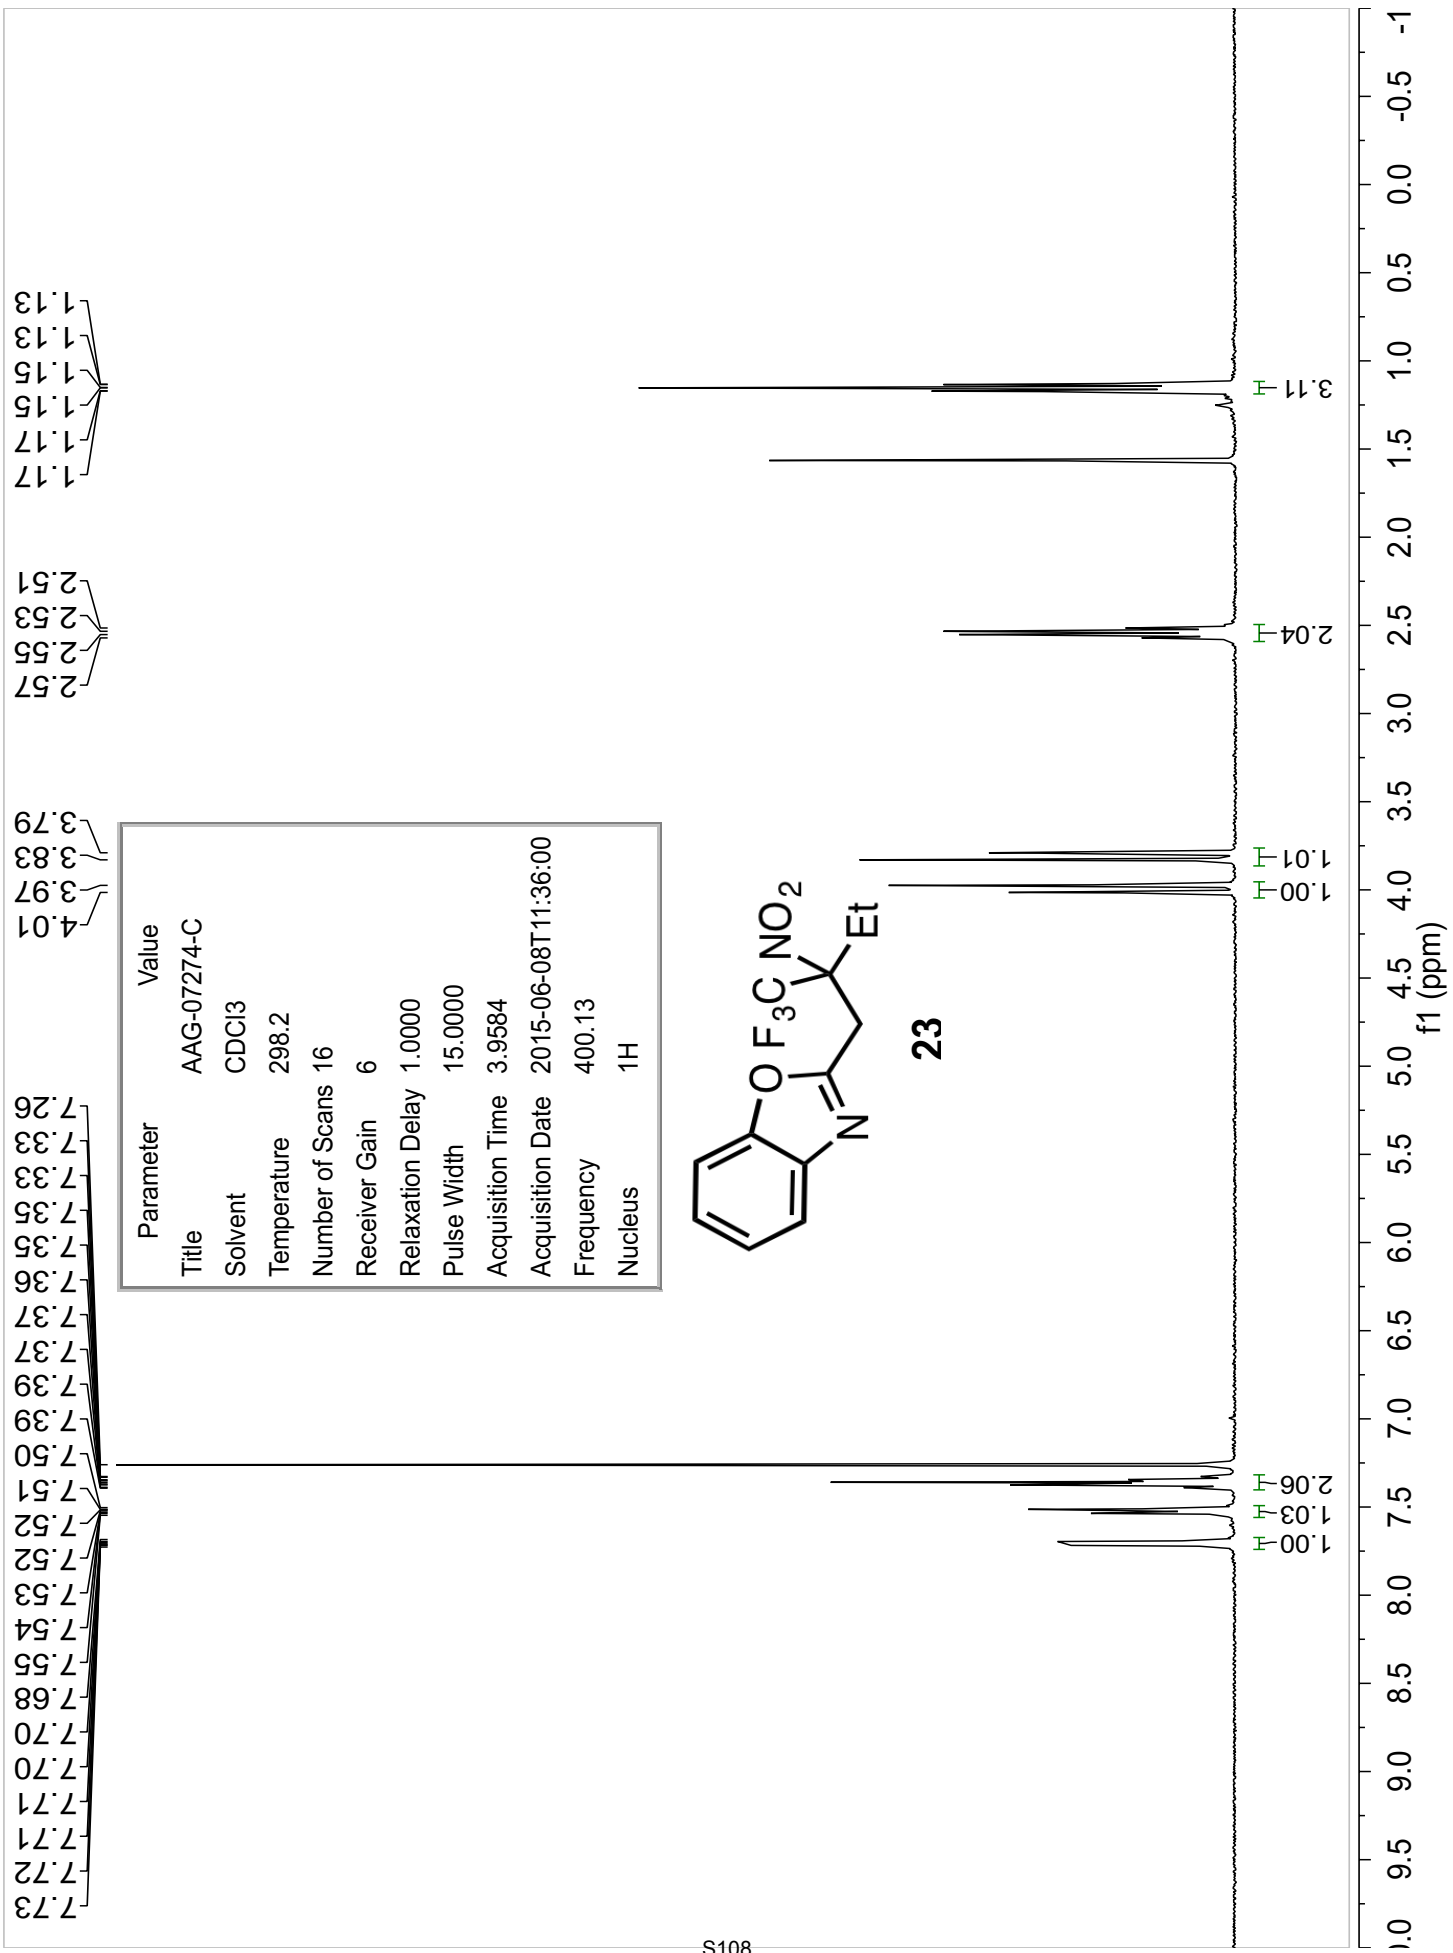

| Parameter        | Value               |
|------------------|---------------------|
| Title            | AAG-07274-C         |
| Solvent          | CDCl <sub>3</sub>   |
| Temperature      | 298.2               |
| Number of Scans  | 16                  |
| Receiver Gain    | 6                   |
| Relaxation Delay | 1.0000              |
| Pulse Width      | 15.0000             |
| Acquisition Time | 3.9584              |
| Acquisition Date | 2015-06-08T11:36:00 |
| Frequency        | 400.13              |
| Nucleus          | <sup>1</sup> H      |

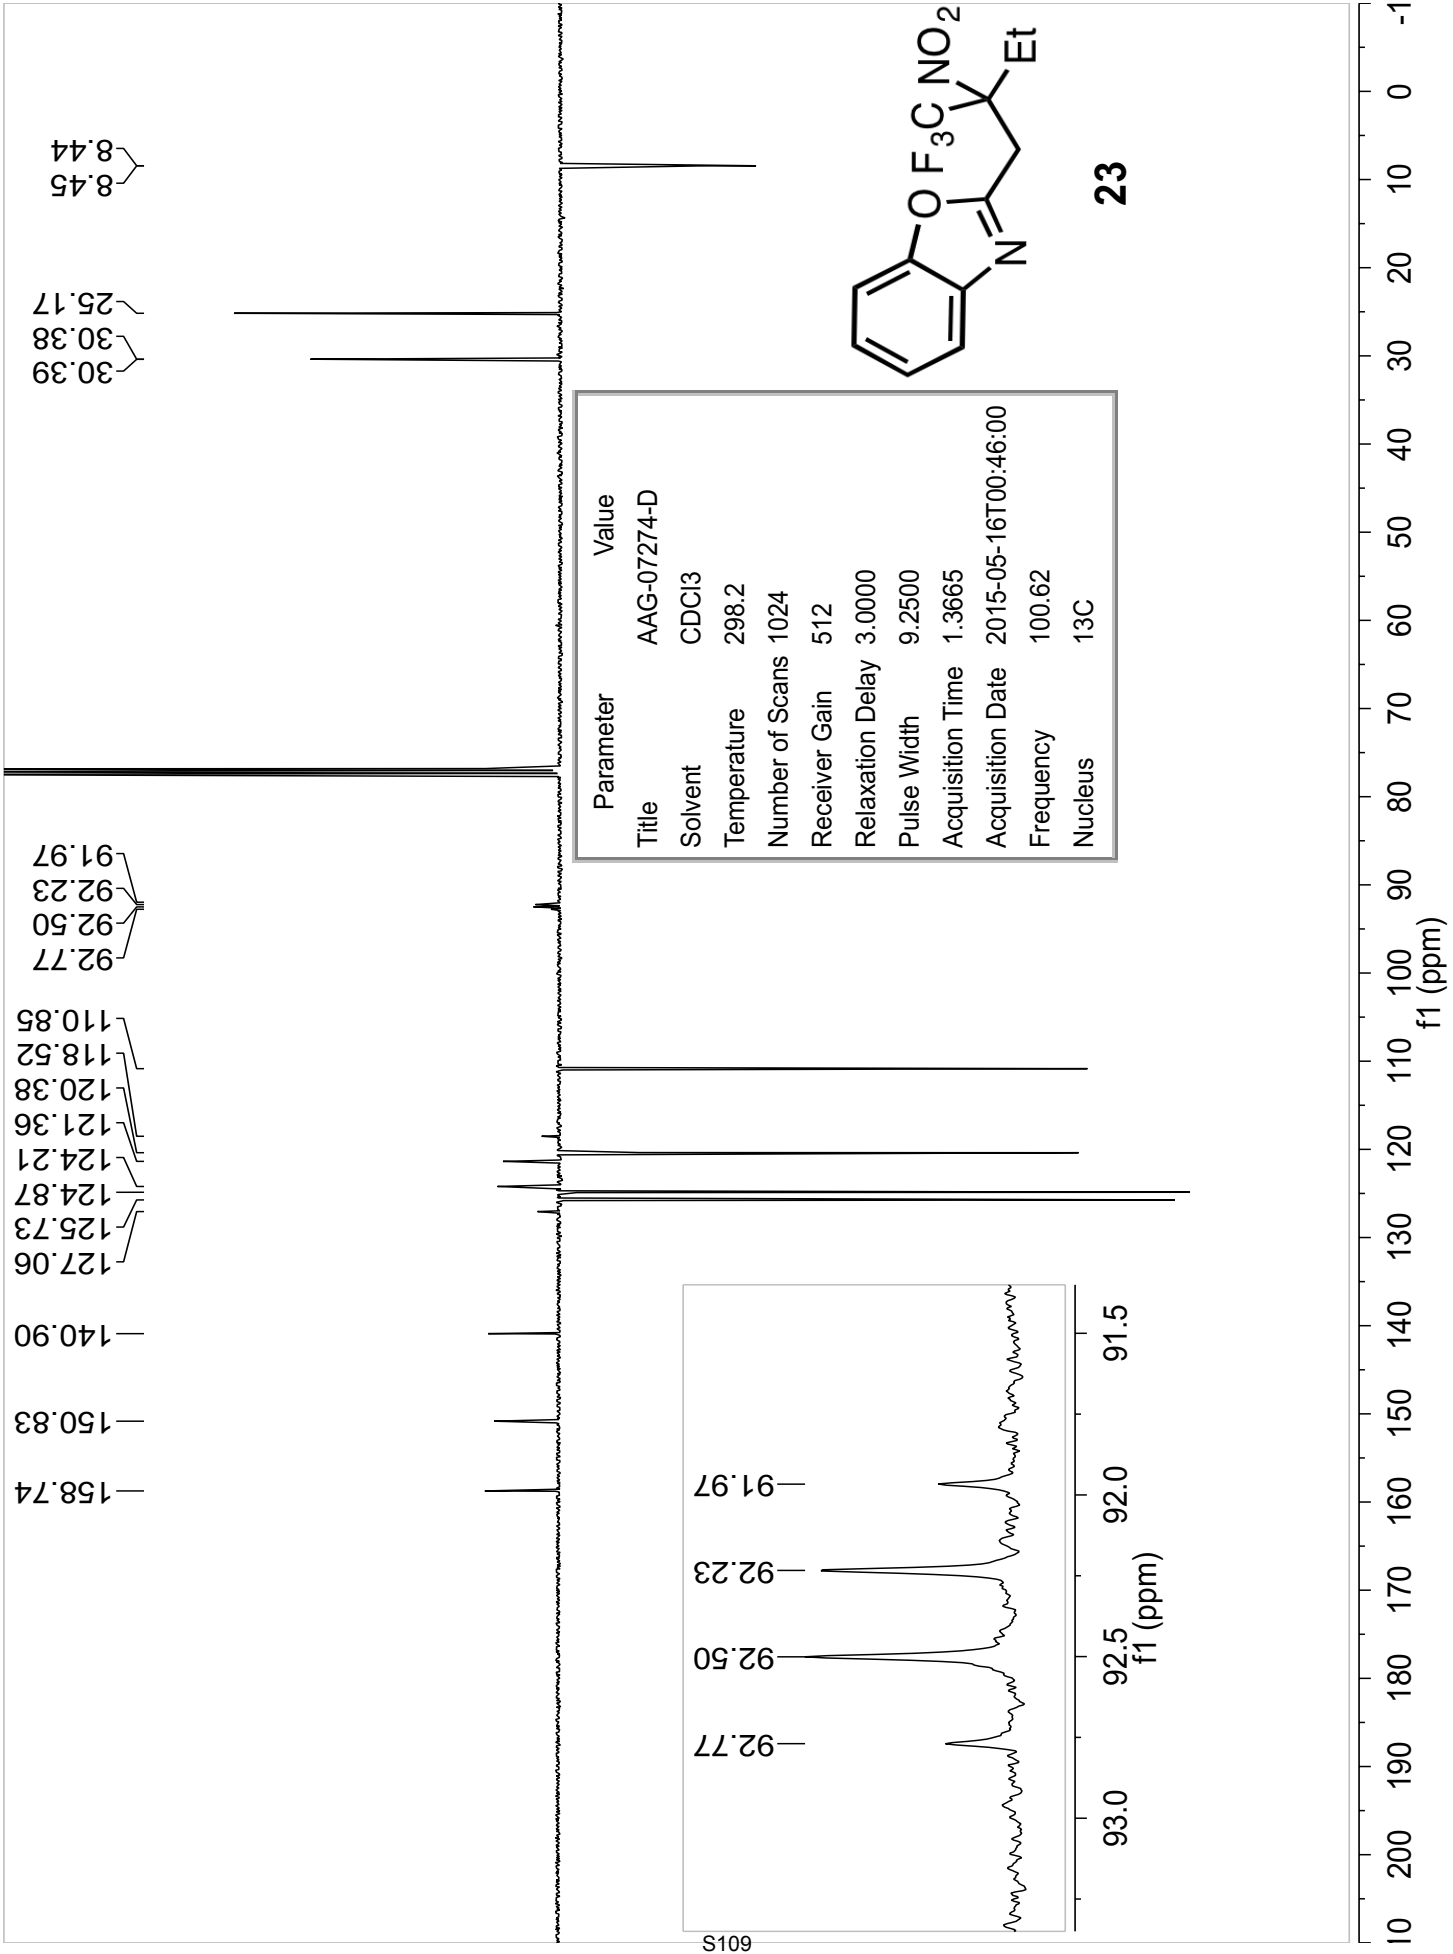

6015

-72.86

| Parameter        | Value               |
|------------------|---------------------|
| Title            | AAG-07274-D         |
| Solvent          | CDCl3               |
| Temperature      | 298.1               |
| Number of Scans  | 16                  |
| Receiver Gain    | 1024                |
| Relaxation Delay | 2.0000              |
| Pulse Width      | 15.0300             |
| Acquisition Time | 0.8717              |
| Acquisition Date | 2015-05-14T19:01:00 |
| Frequency        | 376.46              |
| Nucleus          | 19F                 |

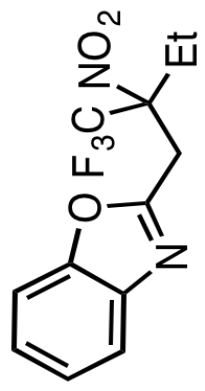

23



1.32  
1.30  
1.29

2.99  
2.98  
2.96  
2.95

7.80  
7.79  
7.78  
7.78  
7.78  
7.57  
7.57  
7.56  
7.42  
7.42  
7.41  
7.41  
7.40  
7.39  
7.38  
7.38  
7.37  
7.37  
7.26  
6.96

| Parameter        | Value               |
|------------------|---------------------|
| Title            | DVR03132A.1.fid     |
| Solvent          | CDCl3               |
| Temperature      | 300.0               |
| Number of Scans  | 16                  |
| Receiver Gain    | 181                 |
| Relaxation Delay | 1.0000              |
| Pulse Width      | 10.7700             |
| Acquisition Time | 2.7263              |
| Acquisition Date | 2015-06-22T22:11:00 |

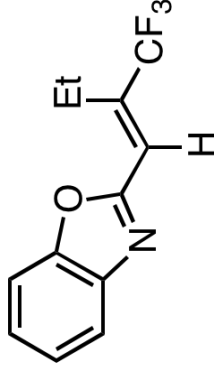

24

3.23 H

2.09 H

0.94 H

2.00 H

0.94 H

0.93 H

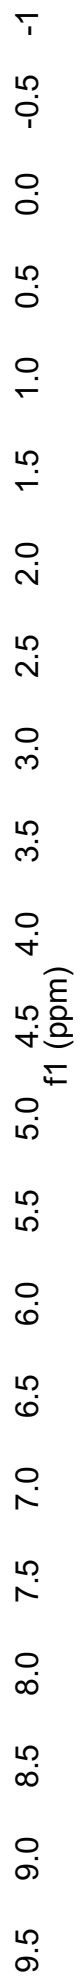

159.62  
150.38  
142.92  
142.73  
142.54  
142.35  
141.86  
126.31  
125.06  
123.24  
120.82  
117.33  
117.28  
117.24  
117.19  
110.87

21.03  
13.23

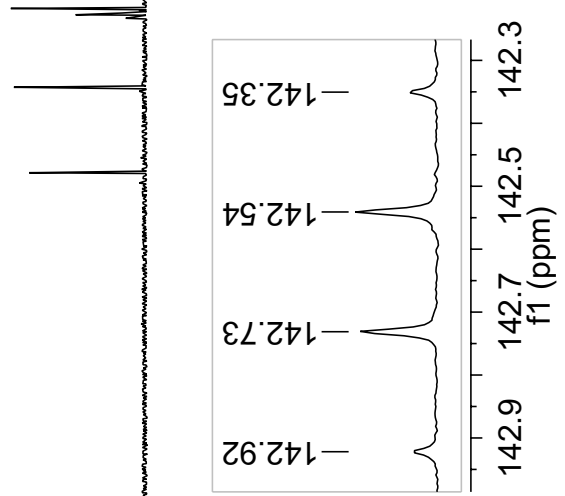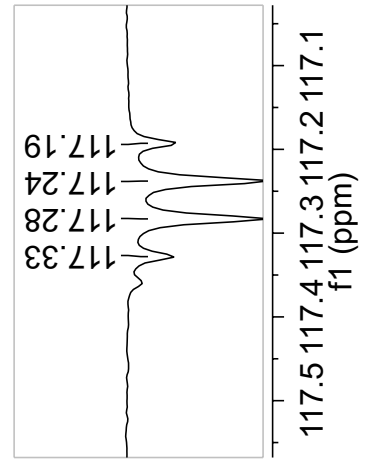

| Parameter        | Value               |
|------------------|---------------------|
| Title            | DVR03132F2C13.1.fid |
| Solvent          | CDCl3               |
| Temperature      | 300.0               |
| Number of Scans  | 1024                |
| Receiver Gain    | 2050                |
| Relaxation Delay | 5.0000              |
| Pulse Width      | 10.6300             |
| Acquisition Time | 0.9437              |
| Acquisition Date | 2015-06-02T22:10:00 |

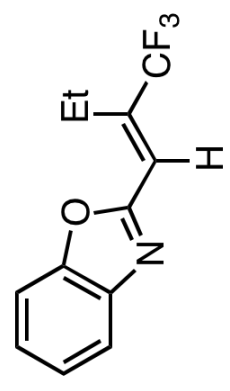

24

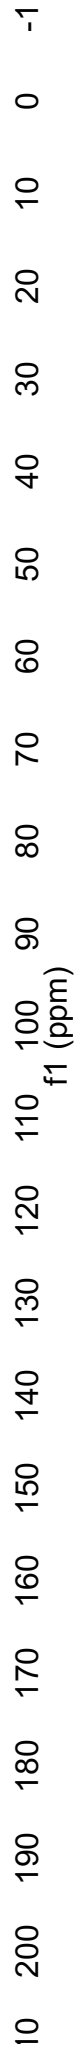



-68.26

| Parameter        | Value               |
|------------------|---------------------|
| Title            | DVR03132F2.2.fid    |
| Solvent          | CDCl3               |
| Temperature      | 300.0               |
| Number of Scans  | 16                  |
| Receiver Gain    | 362                 |
| Relaxation Delay | 3.0000              |
| Pulse Width      | 11.6200             |
| Acquisition Time | 0.4893              |
| Acquisition Date | 2015-06-02T16:25:00 |

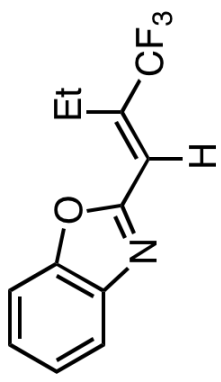

24

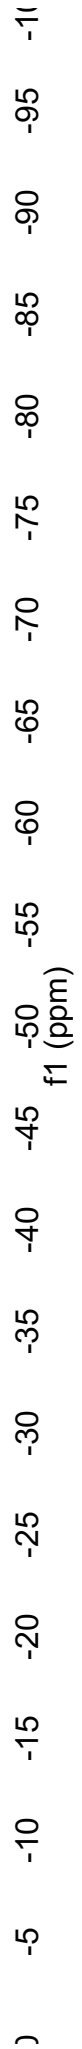

| Parameter        | Value                |
|------------------|----------------------|
| Title            | DVER03132A1NOE.2.fid |
| Solvent          | CDCl3                |
| Temperature      | 298.2                |
| Number of Scans  | 64                   |
| Receiver Gain    | 18                   |
| Relaxation Delay | 2.0000               |
| Pulse Width      | 15.0000              |
| Acquisition Time | 2.0448               |
| Acquisition Date | 2015-06-26T19:37:00  |

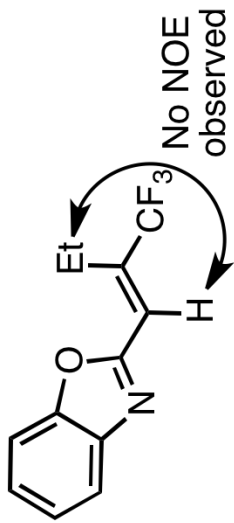

24

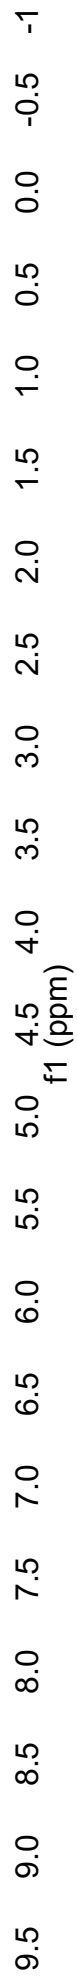

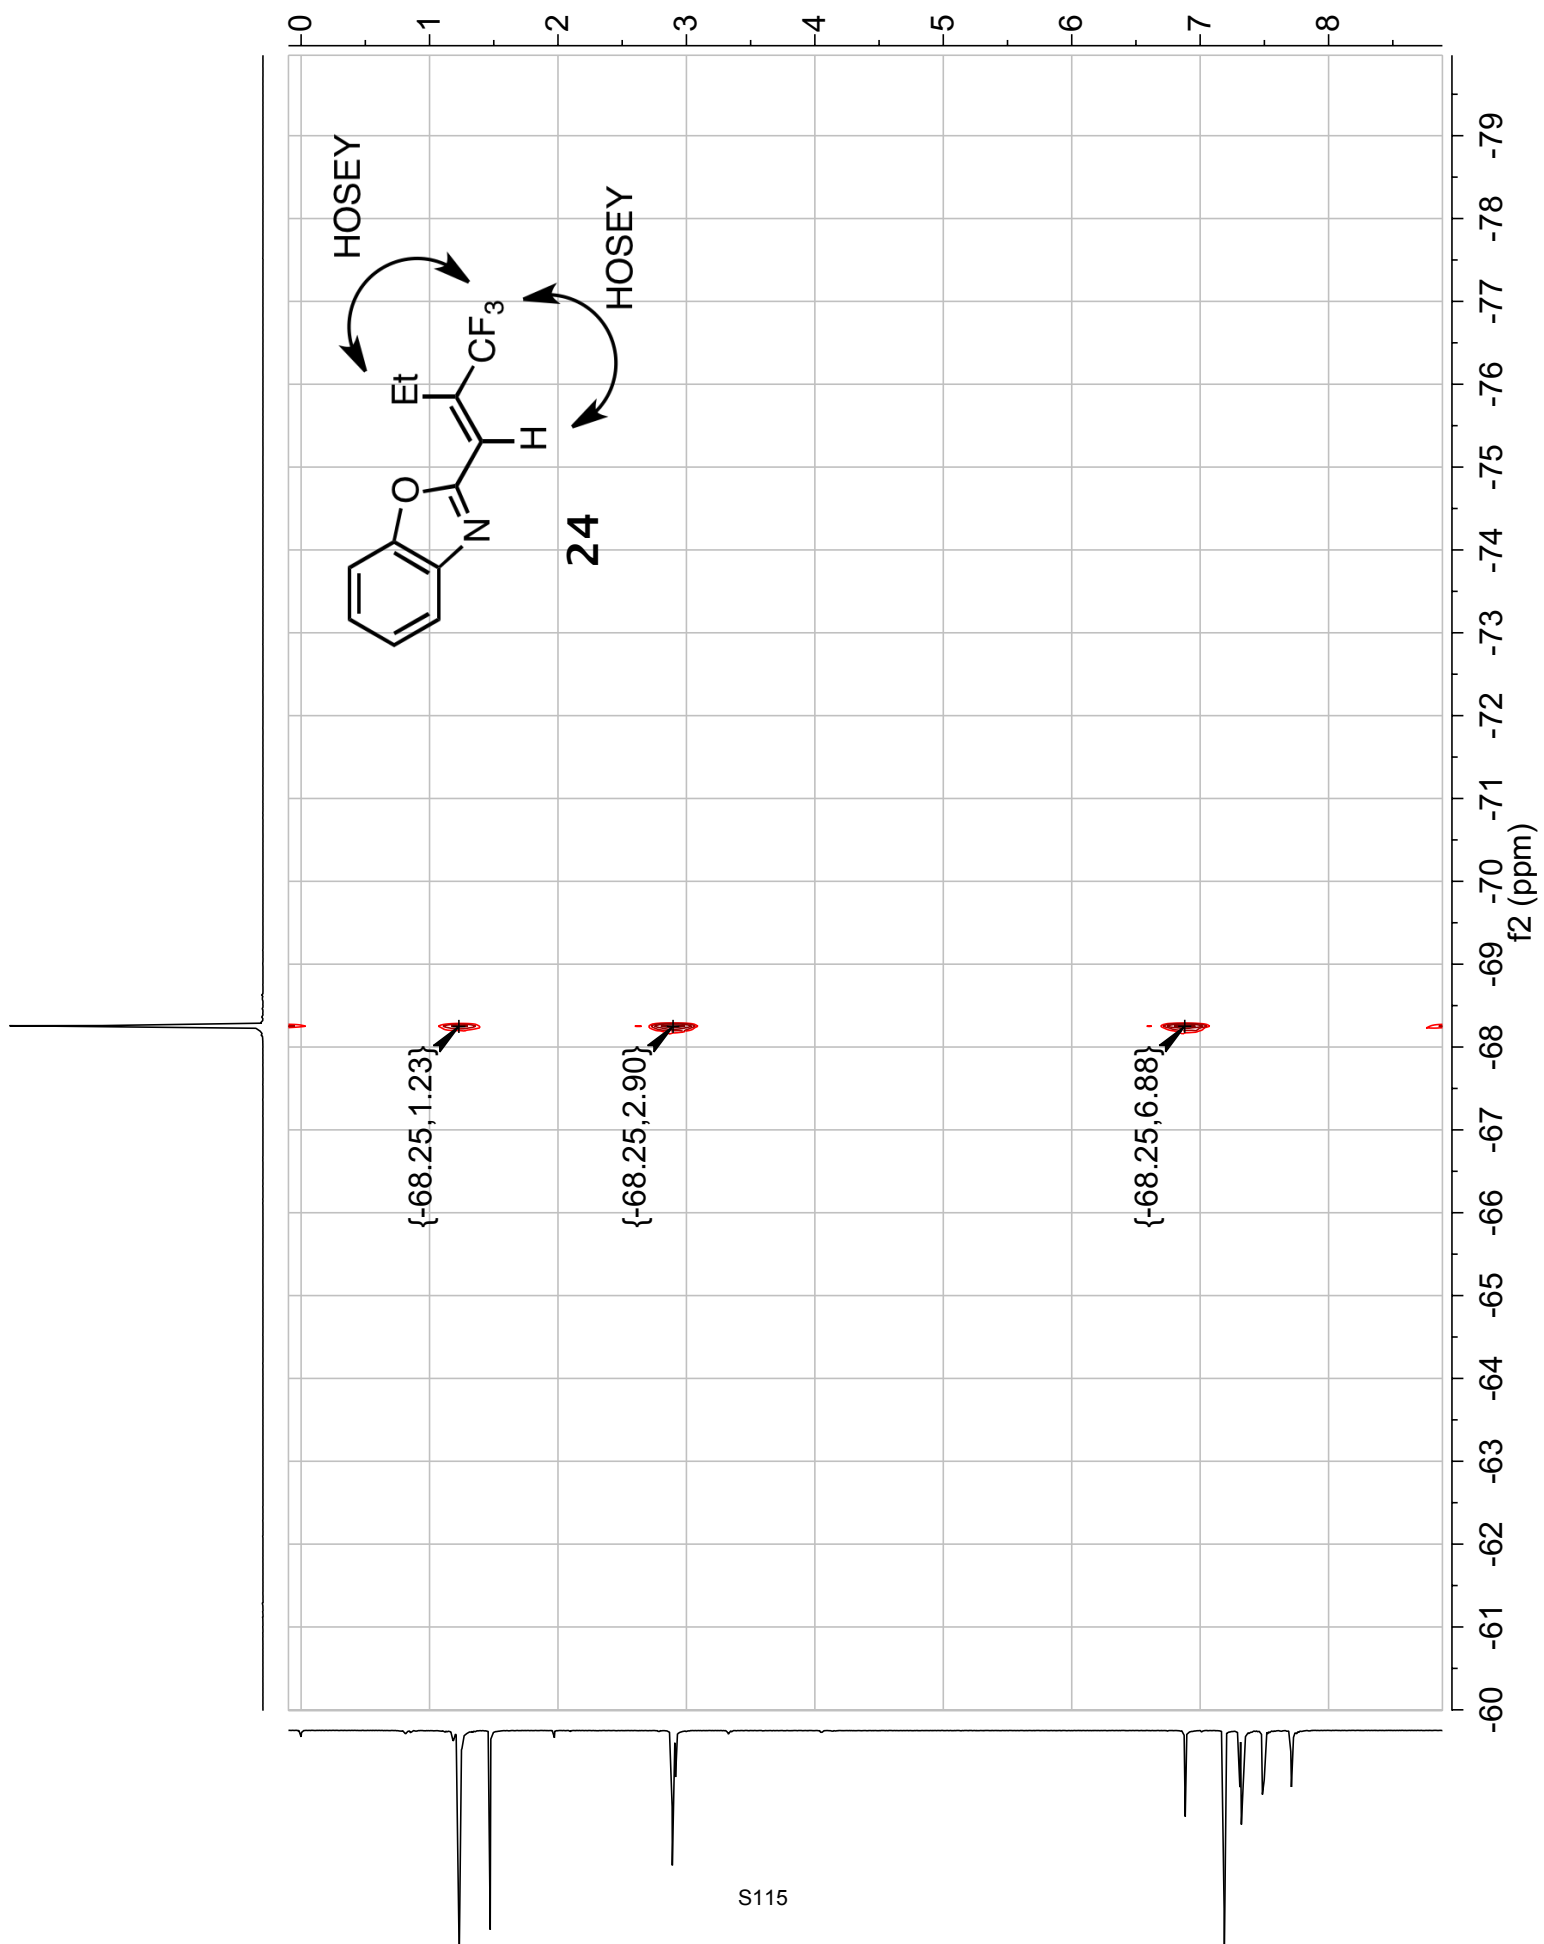

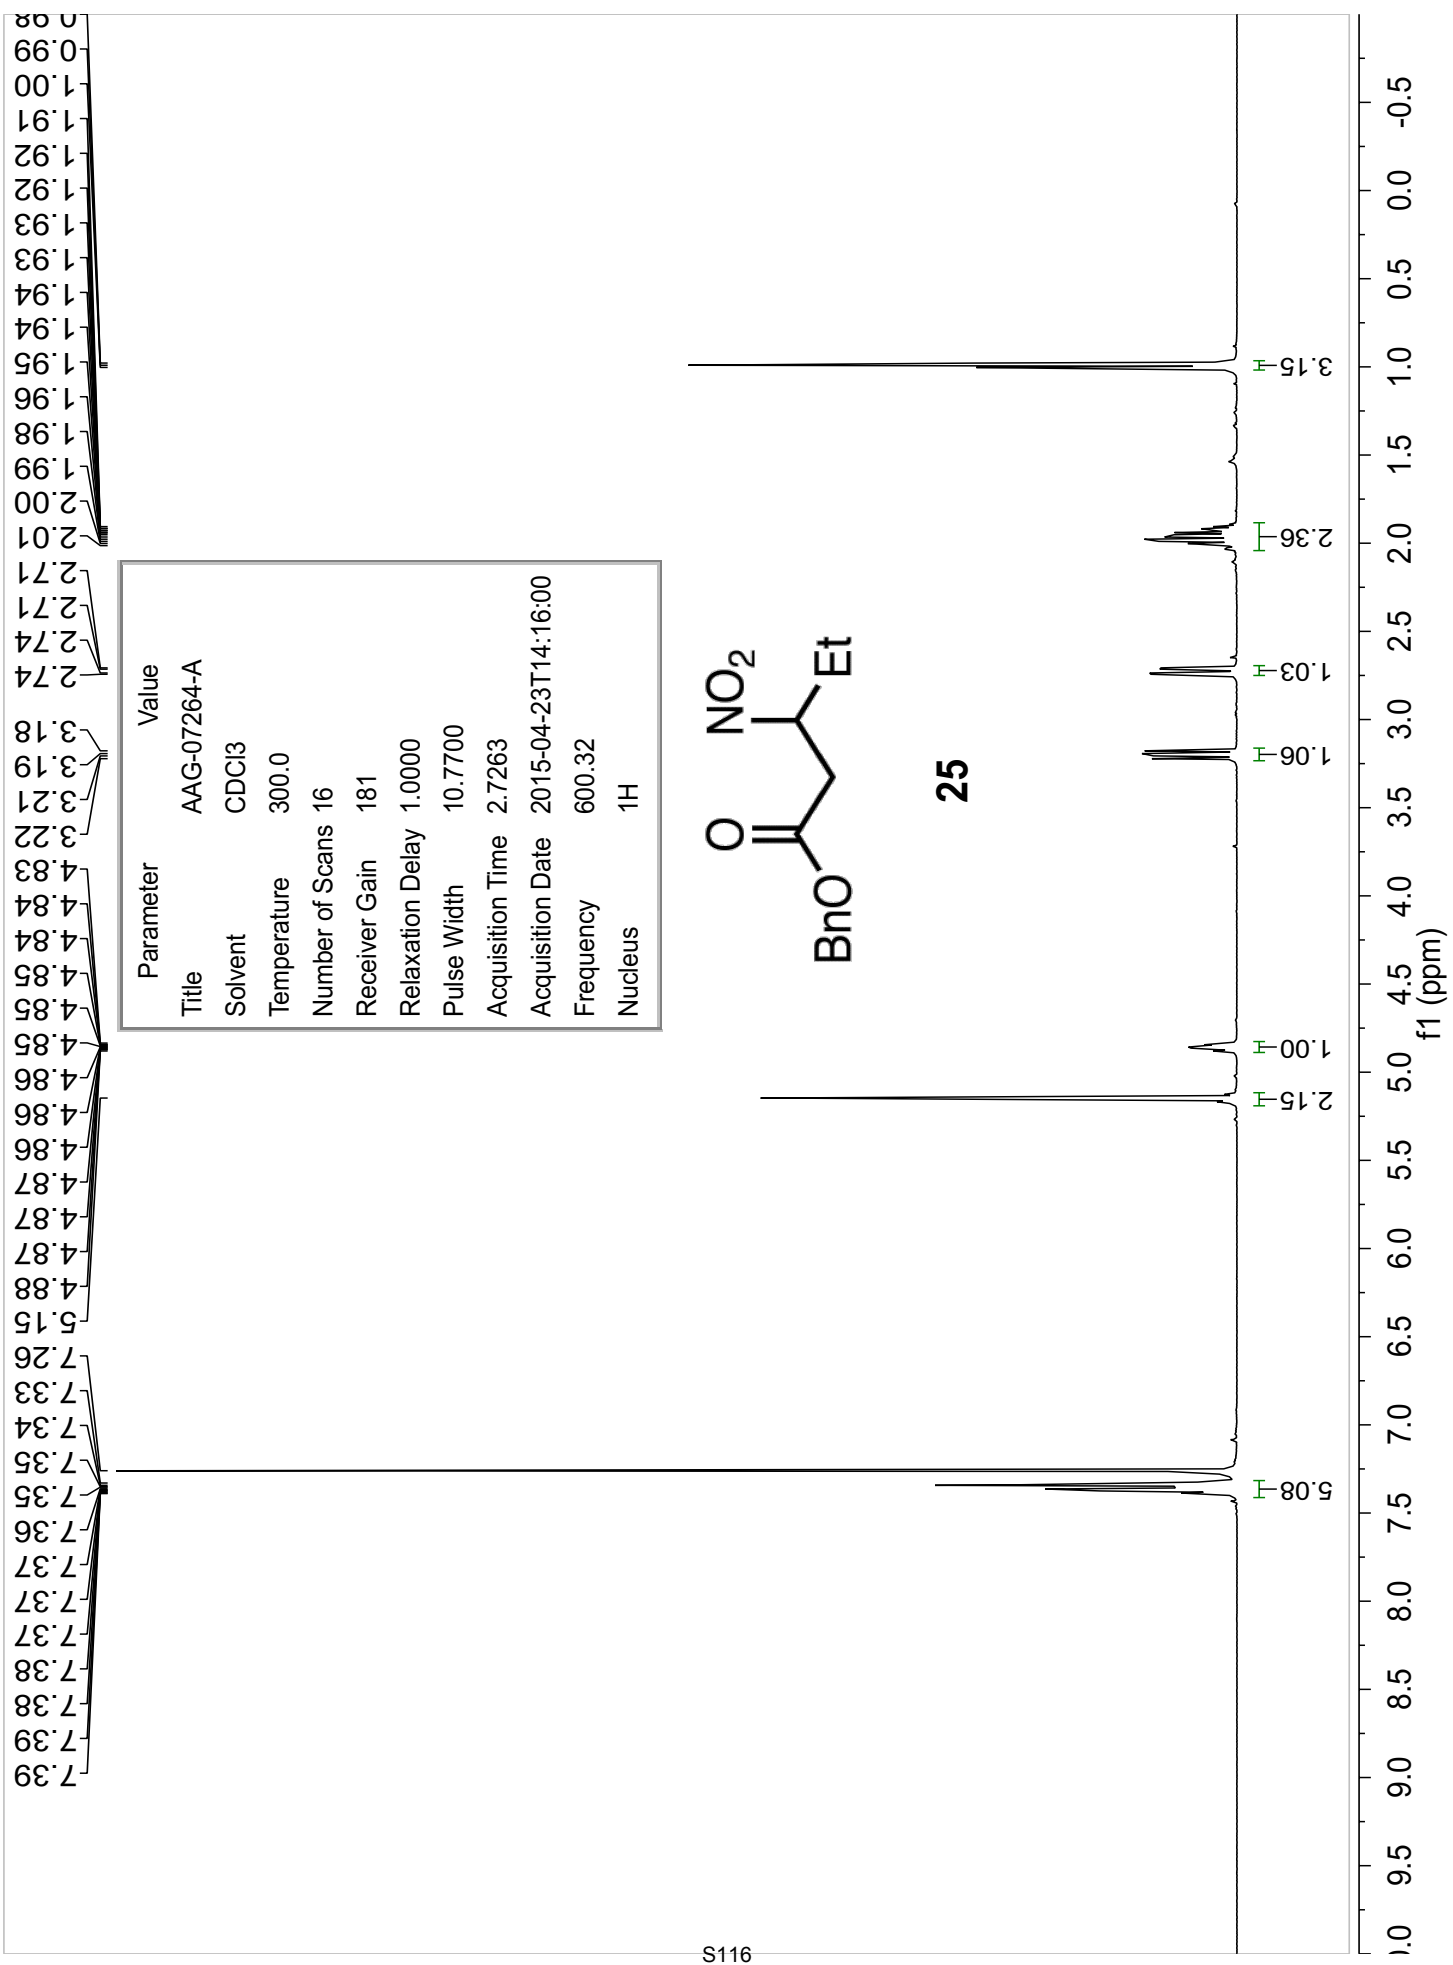

| Parameter        | Value               |
|------------------|---------------------|
| Title            | AAG-07264-A         |
| Solvent          | CDCl3               |
| Temperature      | 300.0               |
| Number of Scans  | 16                  |
| Receiver Gain    | 181                 |
| Relaxation Delay | 1.0000              |
| Pulse Width      | 10.7700             |
| Acquisition Time | 2.7263              |
| Acquisition Date | 2015-04-23T14:16:00 |
| Frequency        | 600.32              |
| Nucleus          | <sup>1</sup> H      |

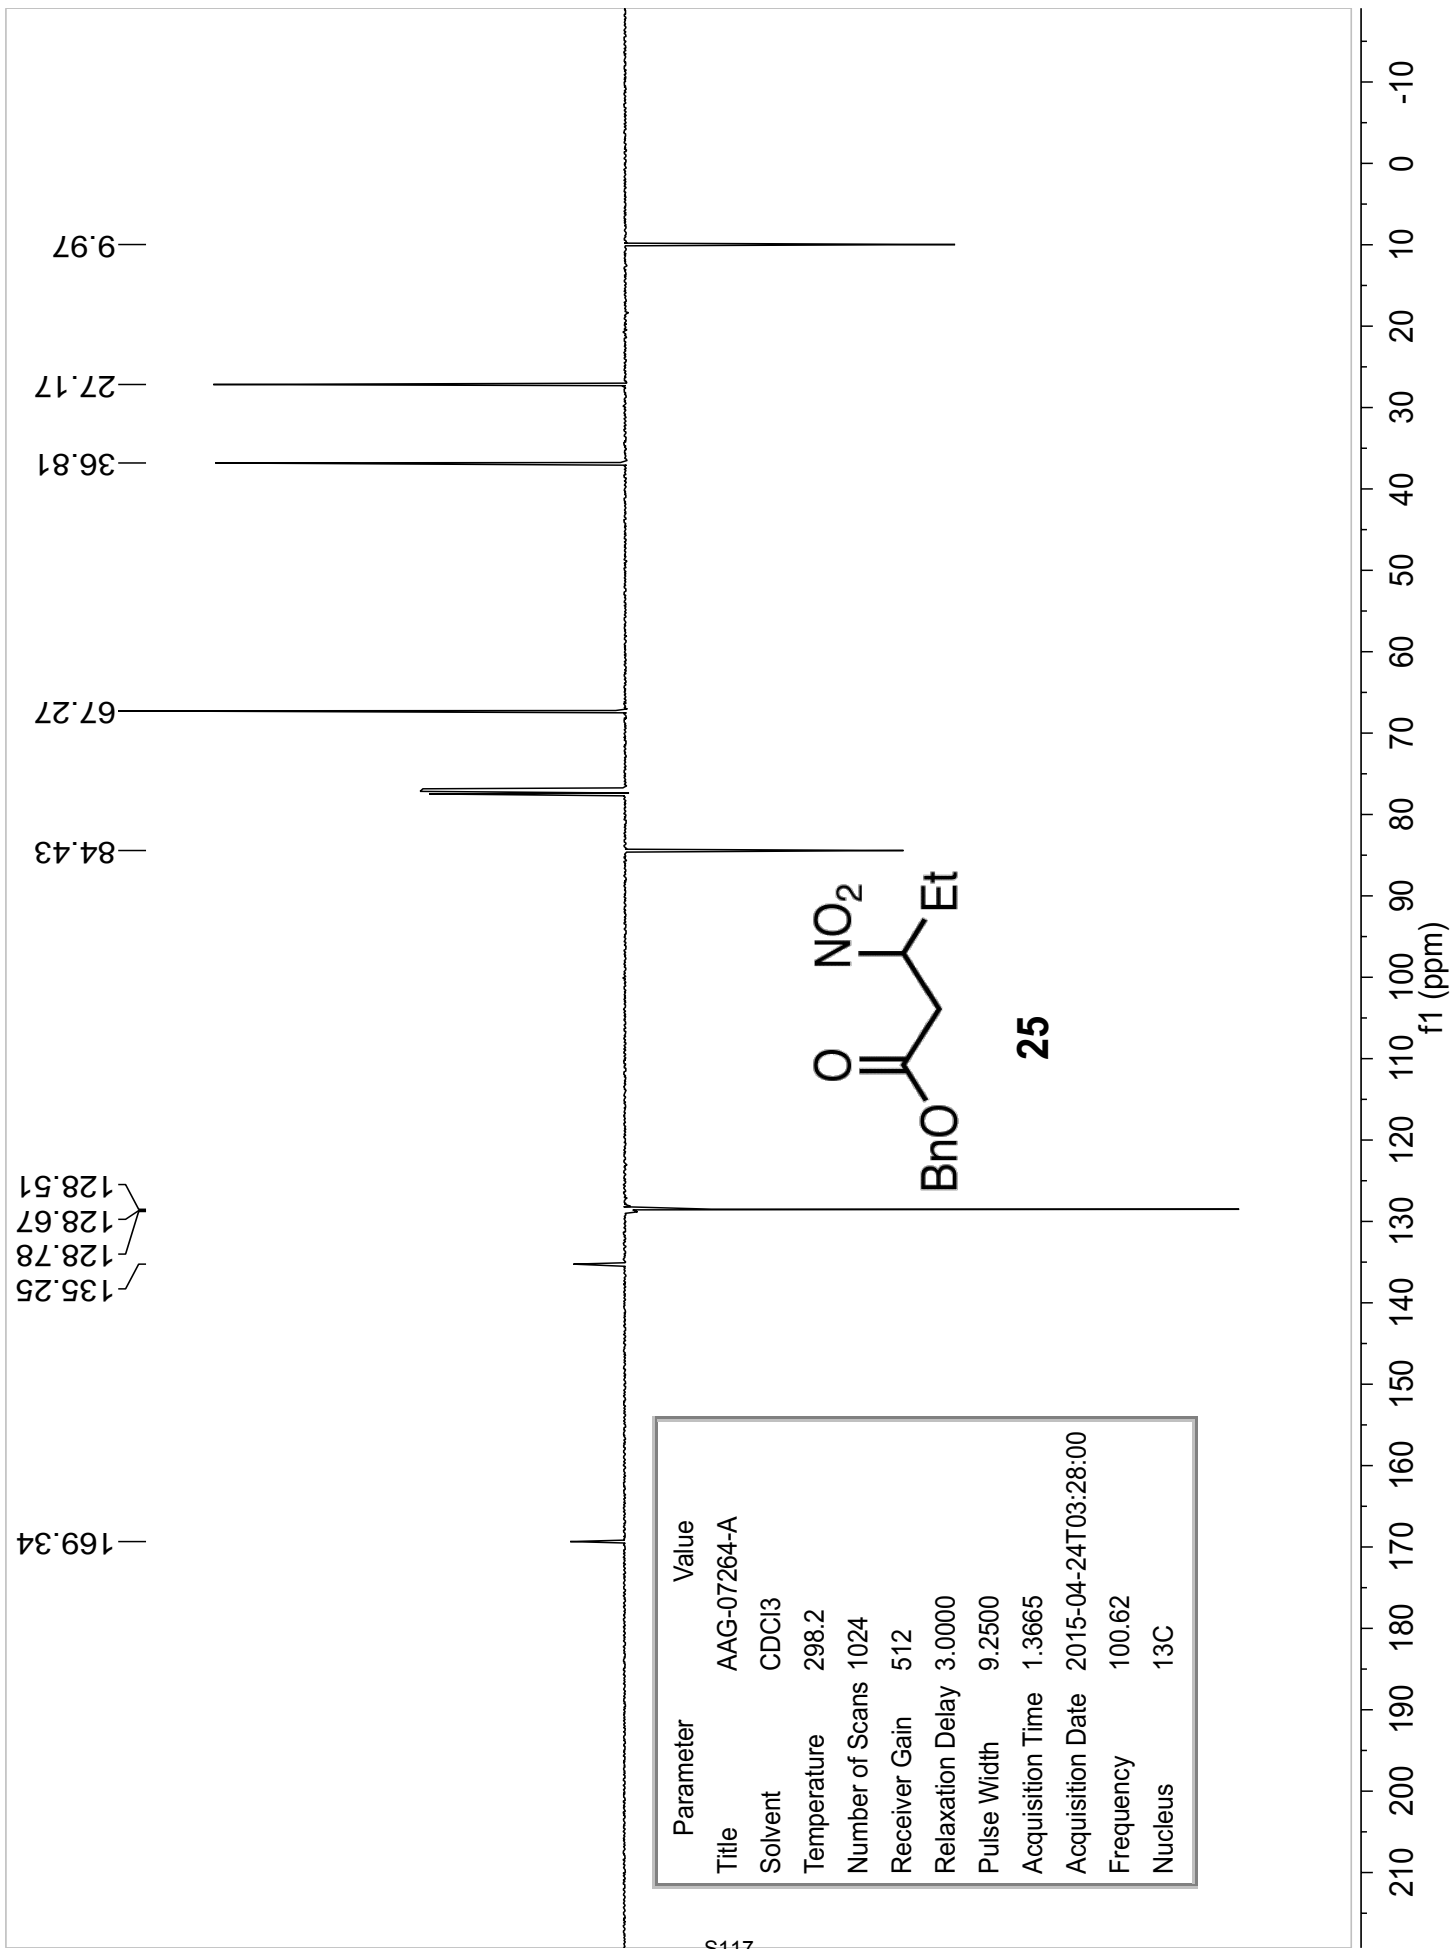

| Parameter        | Value               |
|------------------|---------------------|
| Title            | AAG-07264-A         |
| Solvent          | CDCl3               |
| Temperature      | 298.2               |
| Number of Scans  | 1024                |
| Receiver Gain    | 512                 |
| Relaxation Delay | 3.0000              |
| Pulse Width      | 9.2500              |
| Acquisition Time | 1.3665              |
| Acquisition Date | 2015-04-24T03:28:00 |
| Frequency        | 100.62              |
| Nucleus          | 13C                 |

| Parameter                | Value             |
|--------------------------|-------------------|
| 1 Title                  | DVR03134CRD.1.fid |
| 2 Solvent                | CDCl3             |
| 3 Temperature            | 300.0             |
| 4 Number of Scans        | 16                |
| 5 Receiver Gain          | 161               |
| 6 Relaxation Delay       | 1.0000            |
| 7 Pulse Width            | 10.7700           |
| 8 Spectrometer Frequency | 600.32            |
| 9 Nucleus                | <sup>1</sup> H    |

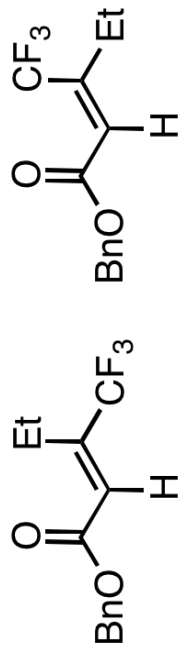

**Crude**  
**27A E:Z = 88:12**    **27B**

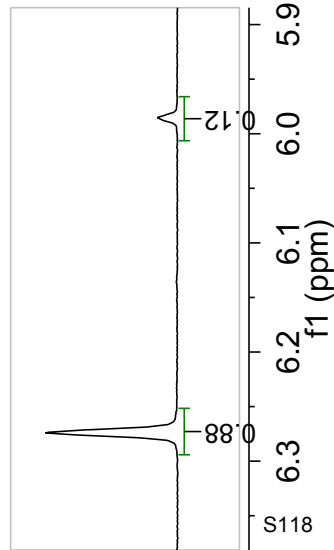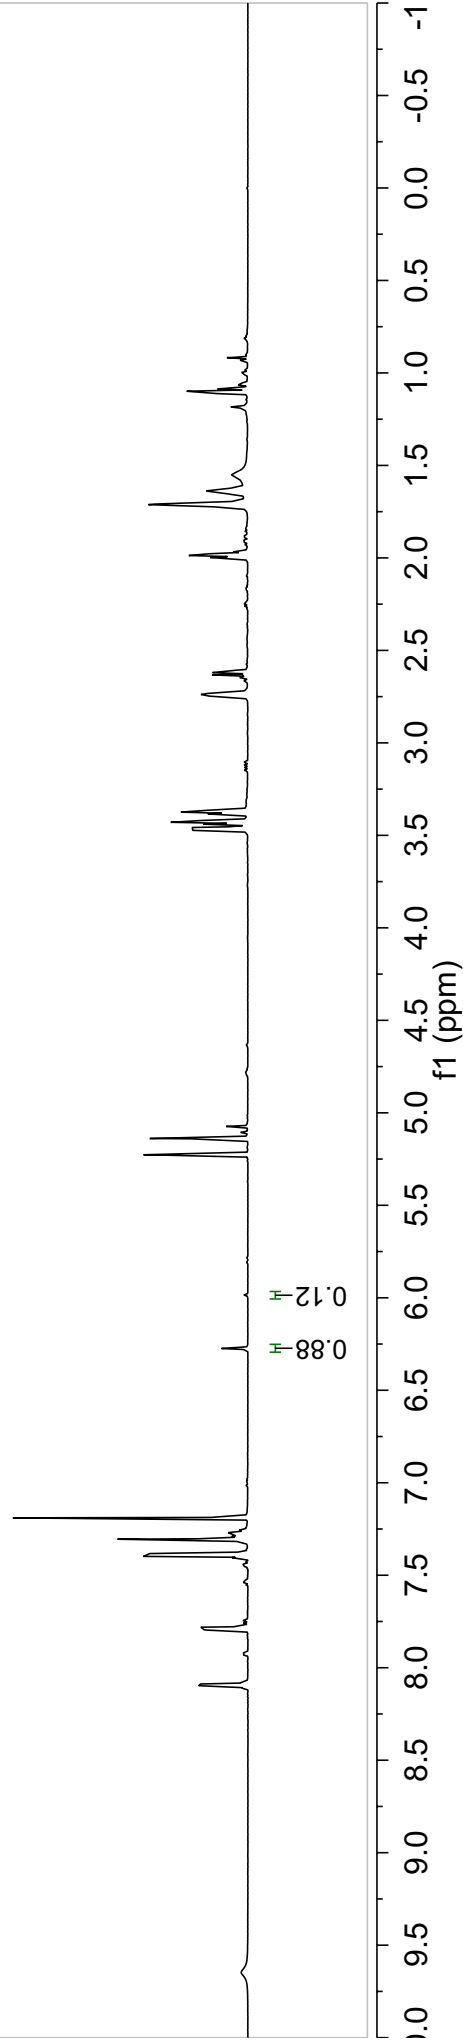

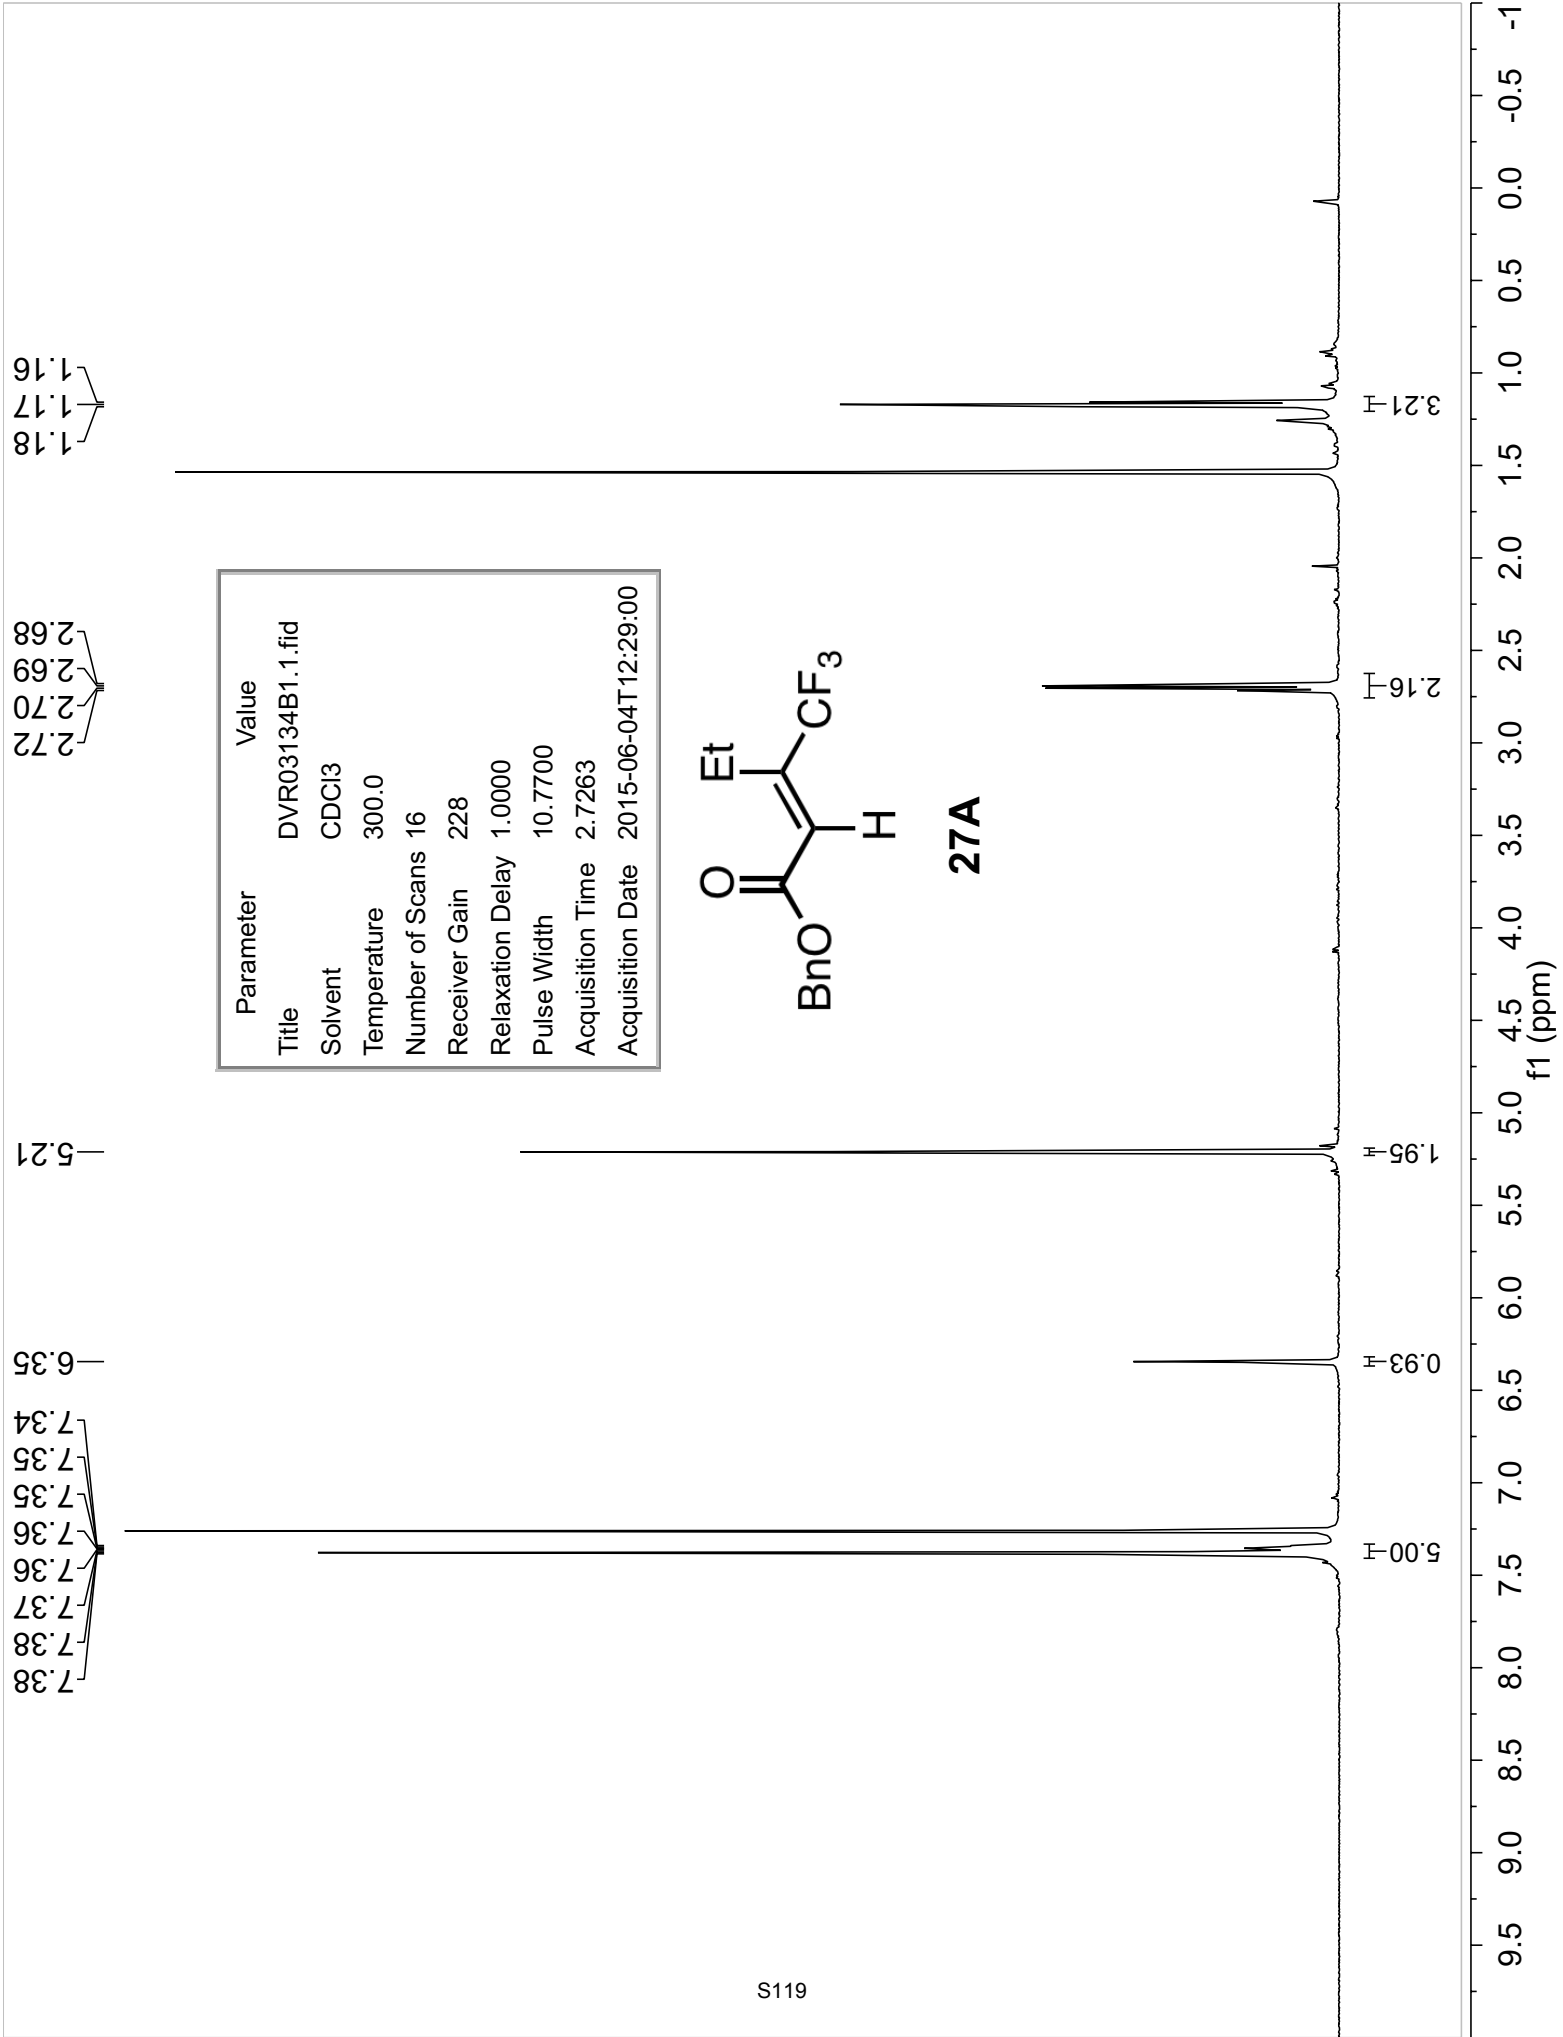

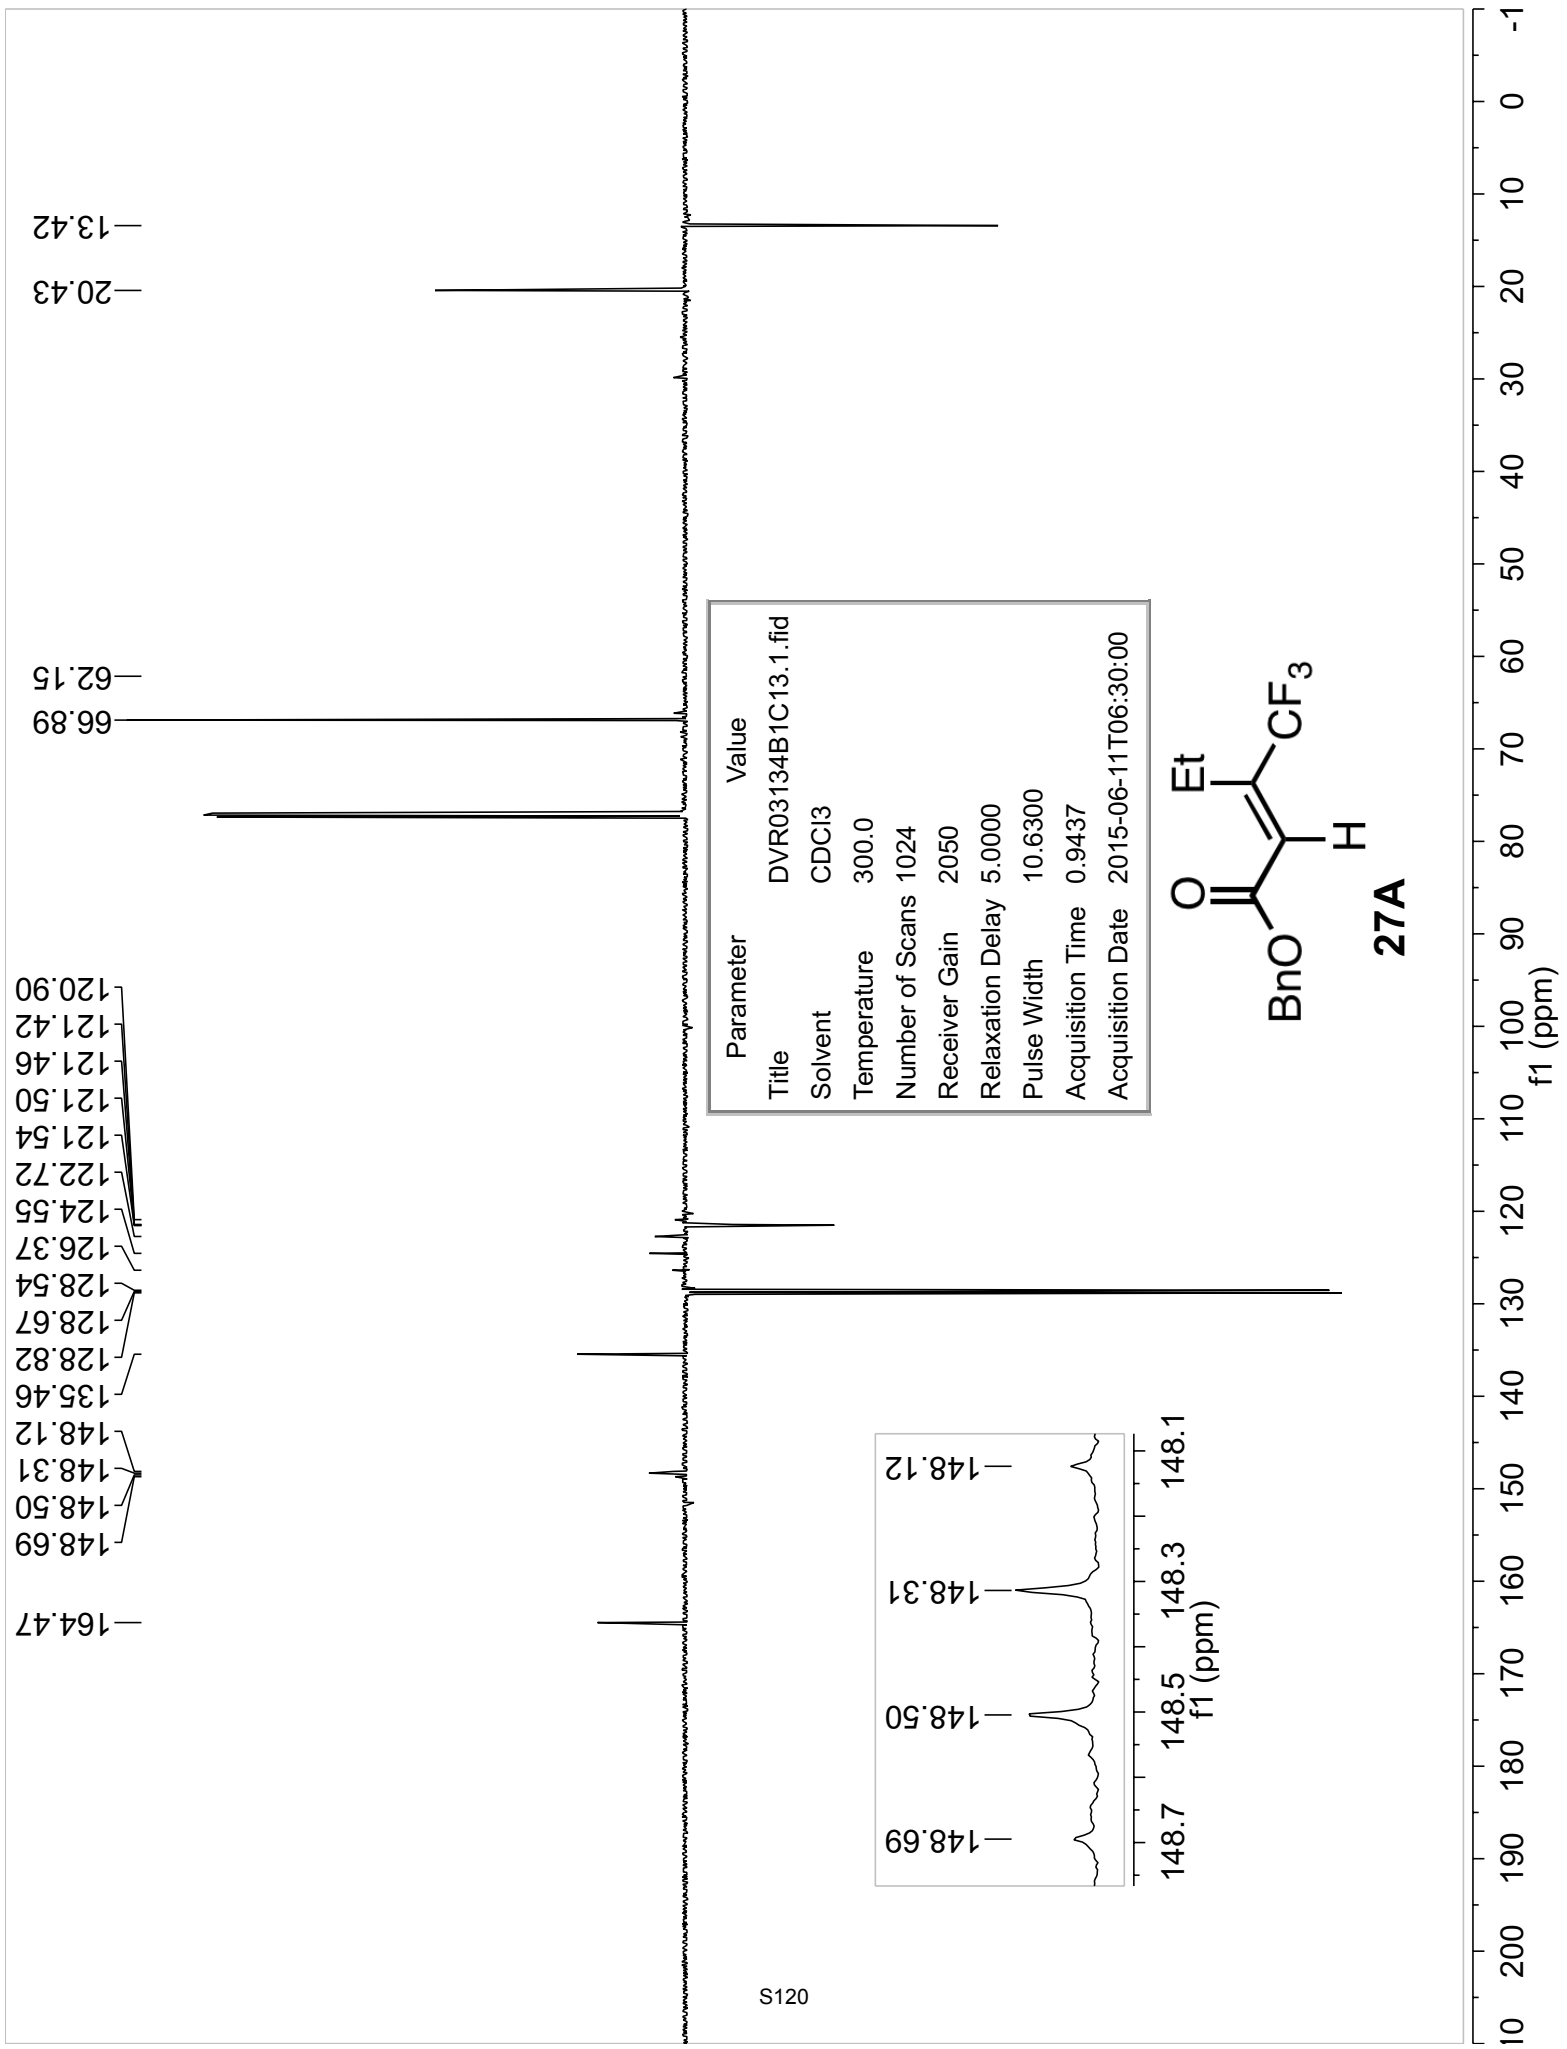



-69.17

| Parameter        | Value               |
|------------------|---------------------|
| Title            | DVR03134B1.2.fid    |
| Solvent          | CDCl3               |
| Temperature      | 300.0               |
| Number of Scans  | 16                  |
| Receiver Gain    | 362                 |
| Relaxation Delay | 3.0000              |
| Pulse Width      | 11.6200             |
| Acquisition Time | 0.4893              |
| Acquisition Date | 2015-06-04T12:32:00 |

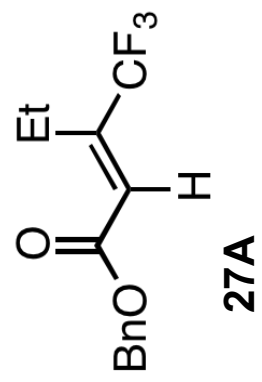

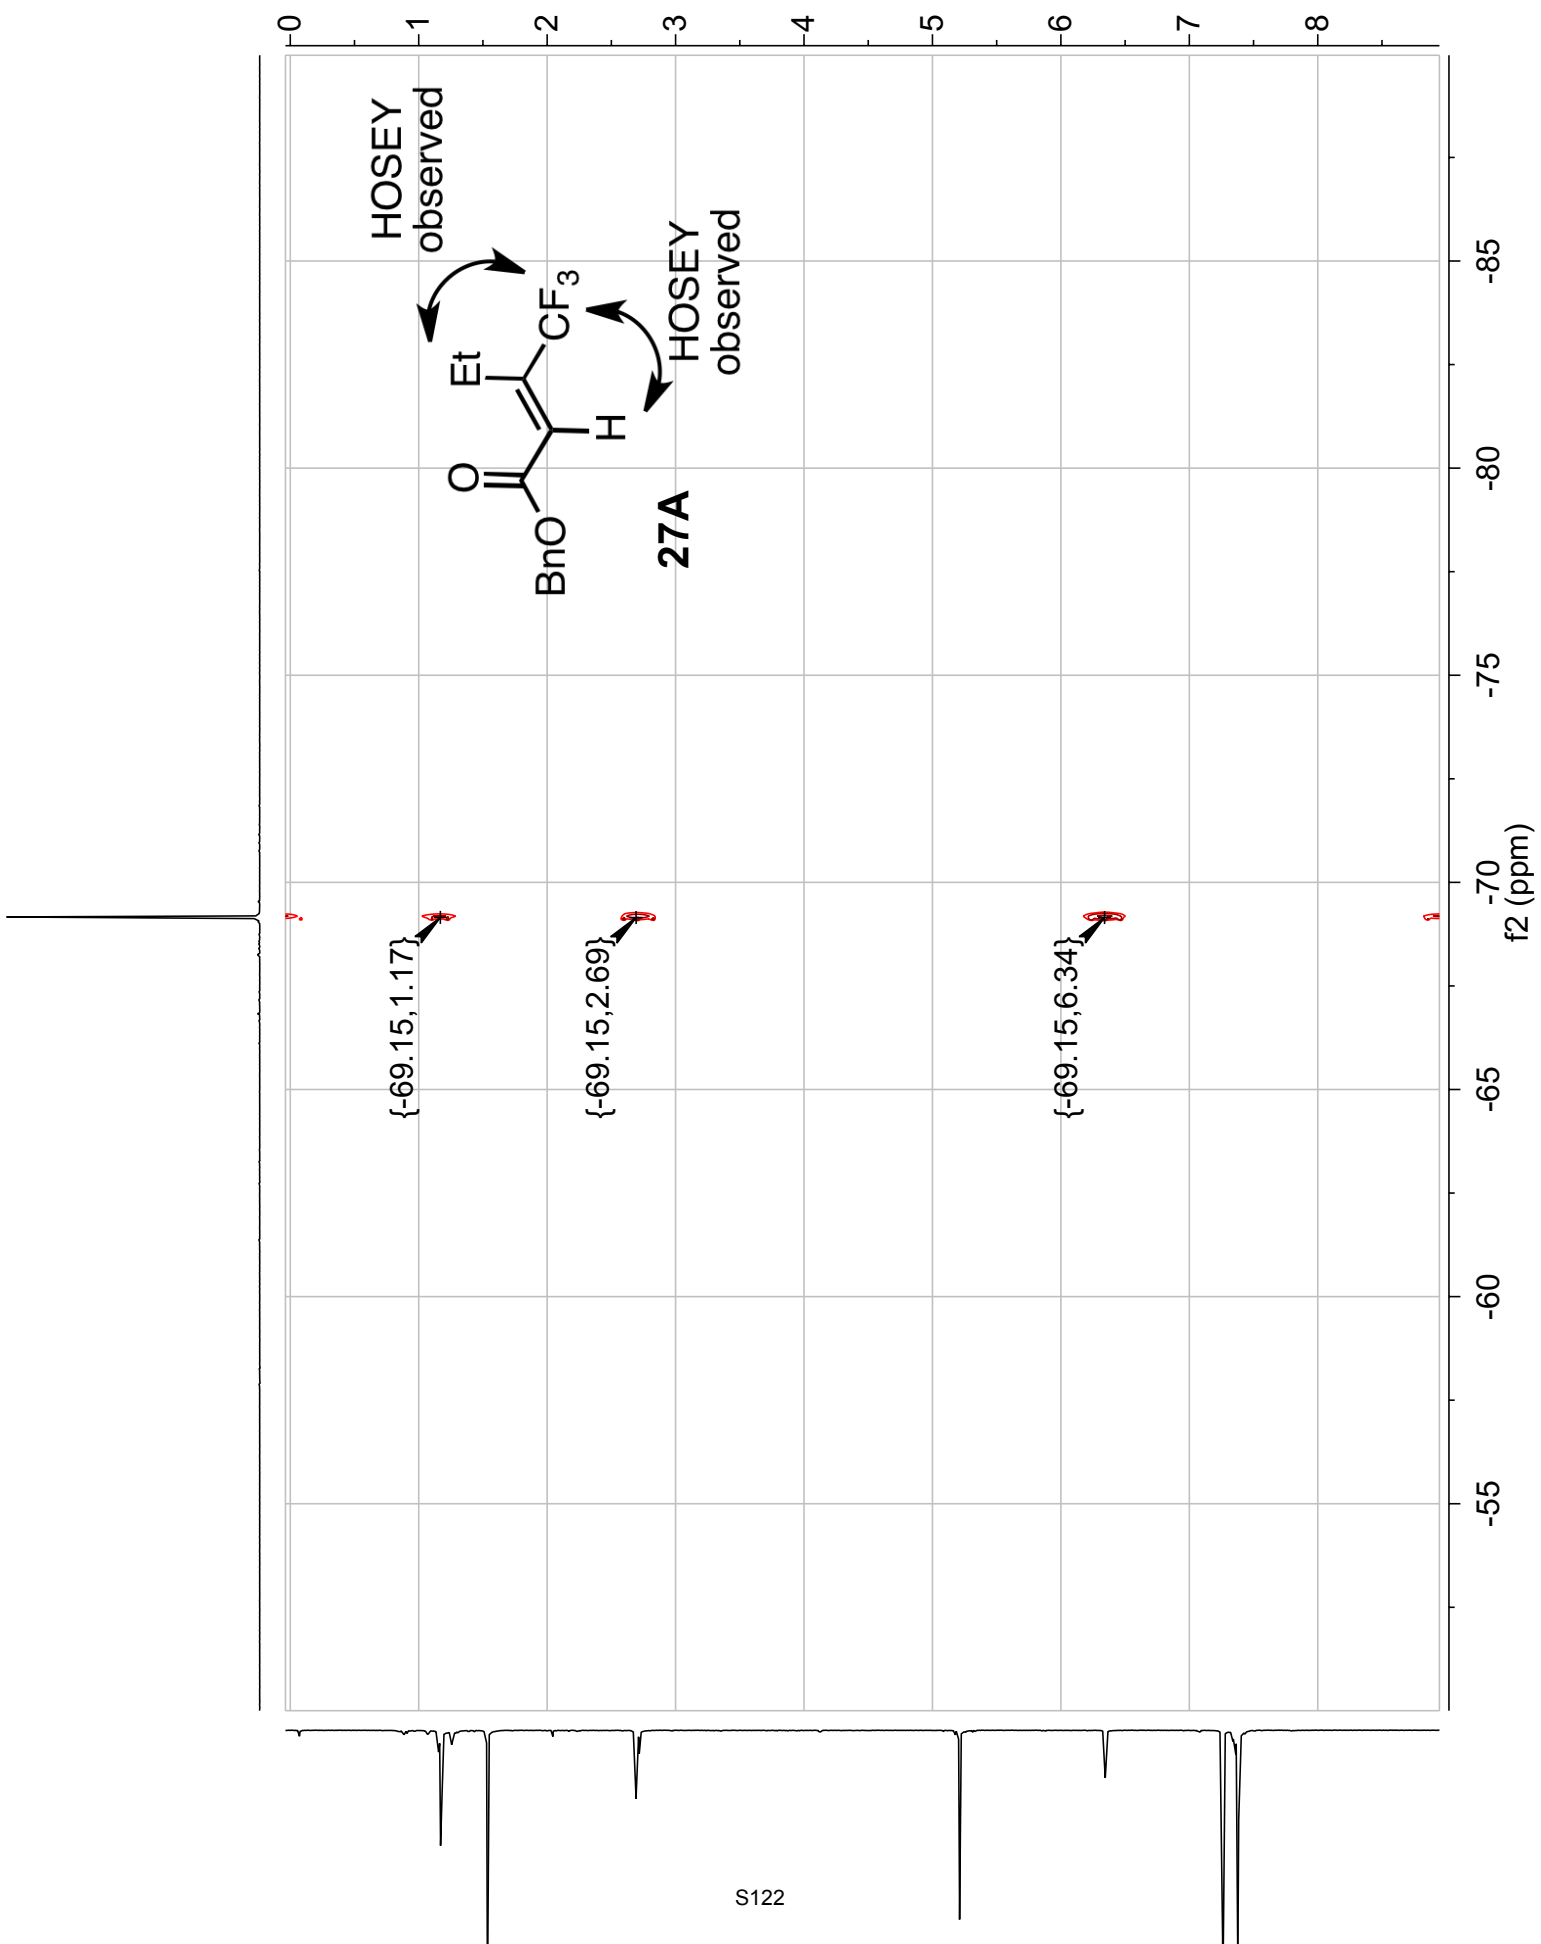

| Parameter        | Value                |
|------------------|----------------------|
| Title            | DVR03134B1 NOE.2.fid |
| Solvent          | CDCl <sub>3</sub>    |
| Temperature      | 298.2                |
| Number of Scans  | 64                   |
| Receiver Gain    | 18                   |
| Relaxation Delay | 2.0000               |
| Pulse Width      | 15.0000              |
| Acquisition Time | 2.0448               |
| Acquisition Date | 2015-06-26T19:02:00  |

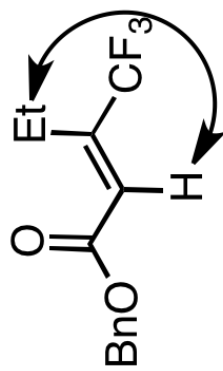

**27A** No NOE  
observed

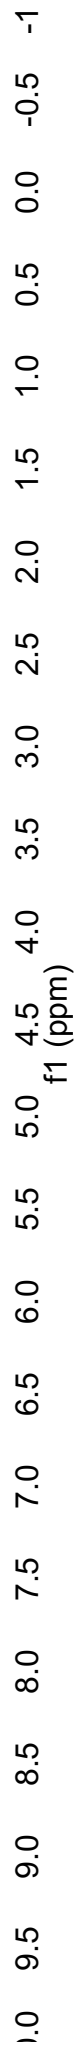

| Parameter                | Value                |
|--------------------------|----------------------|
| 1 Title                  | DVR05033F1 C13.1.fid |
| 2 Solvent                | CDCl3                |
| 3 Temperature            | 298.2                |
| 4 Number of Scans        | 1024                 |
| 5 Receiver Gain          | 512                  |
| 6 Relaxation Delay       | 3.0000               |
| 7 Pulse Width            | 9.2500               |
| 8 Spectrometer Frequency | 100.62               |
| 9 Nucleus                | <sup>13</sup> C      |

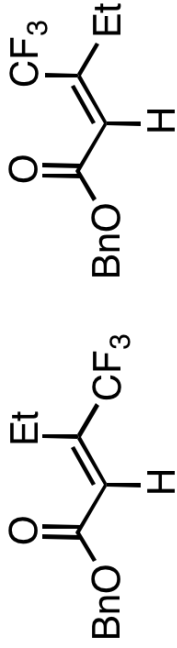

**27A E:Z = 88:12 27B**

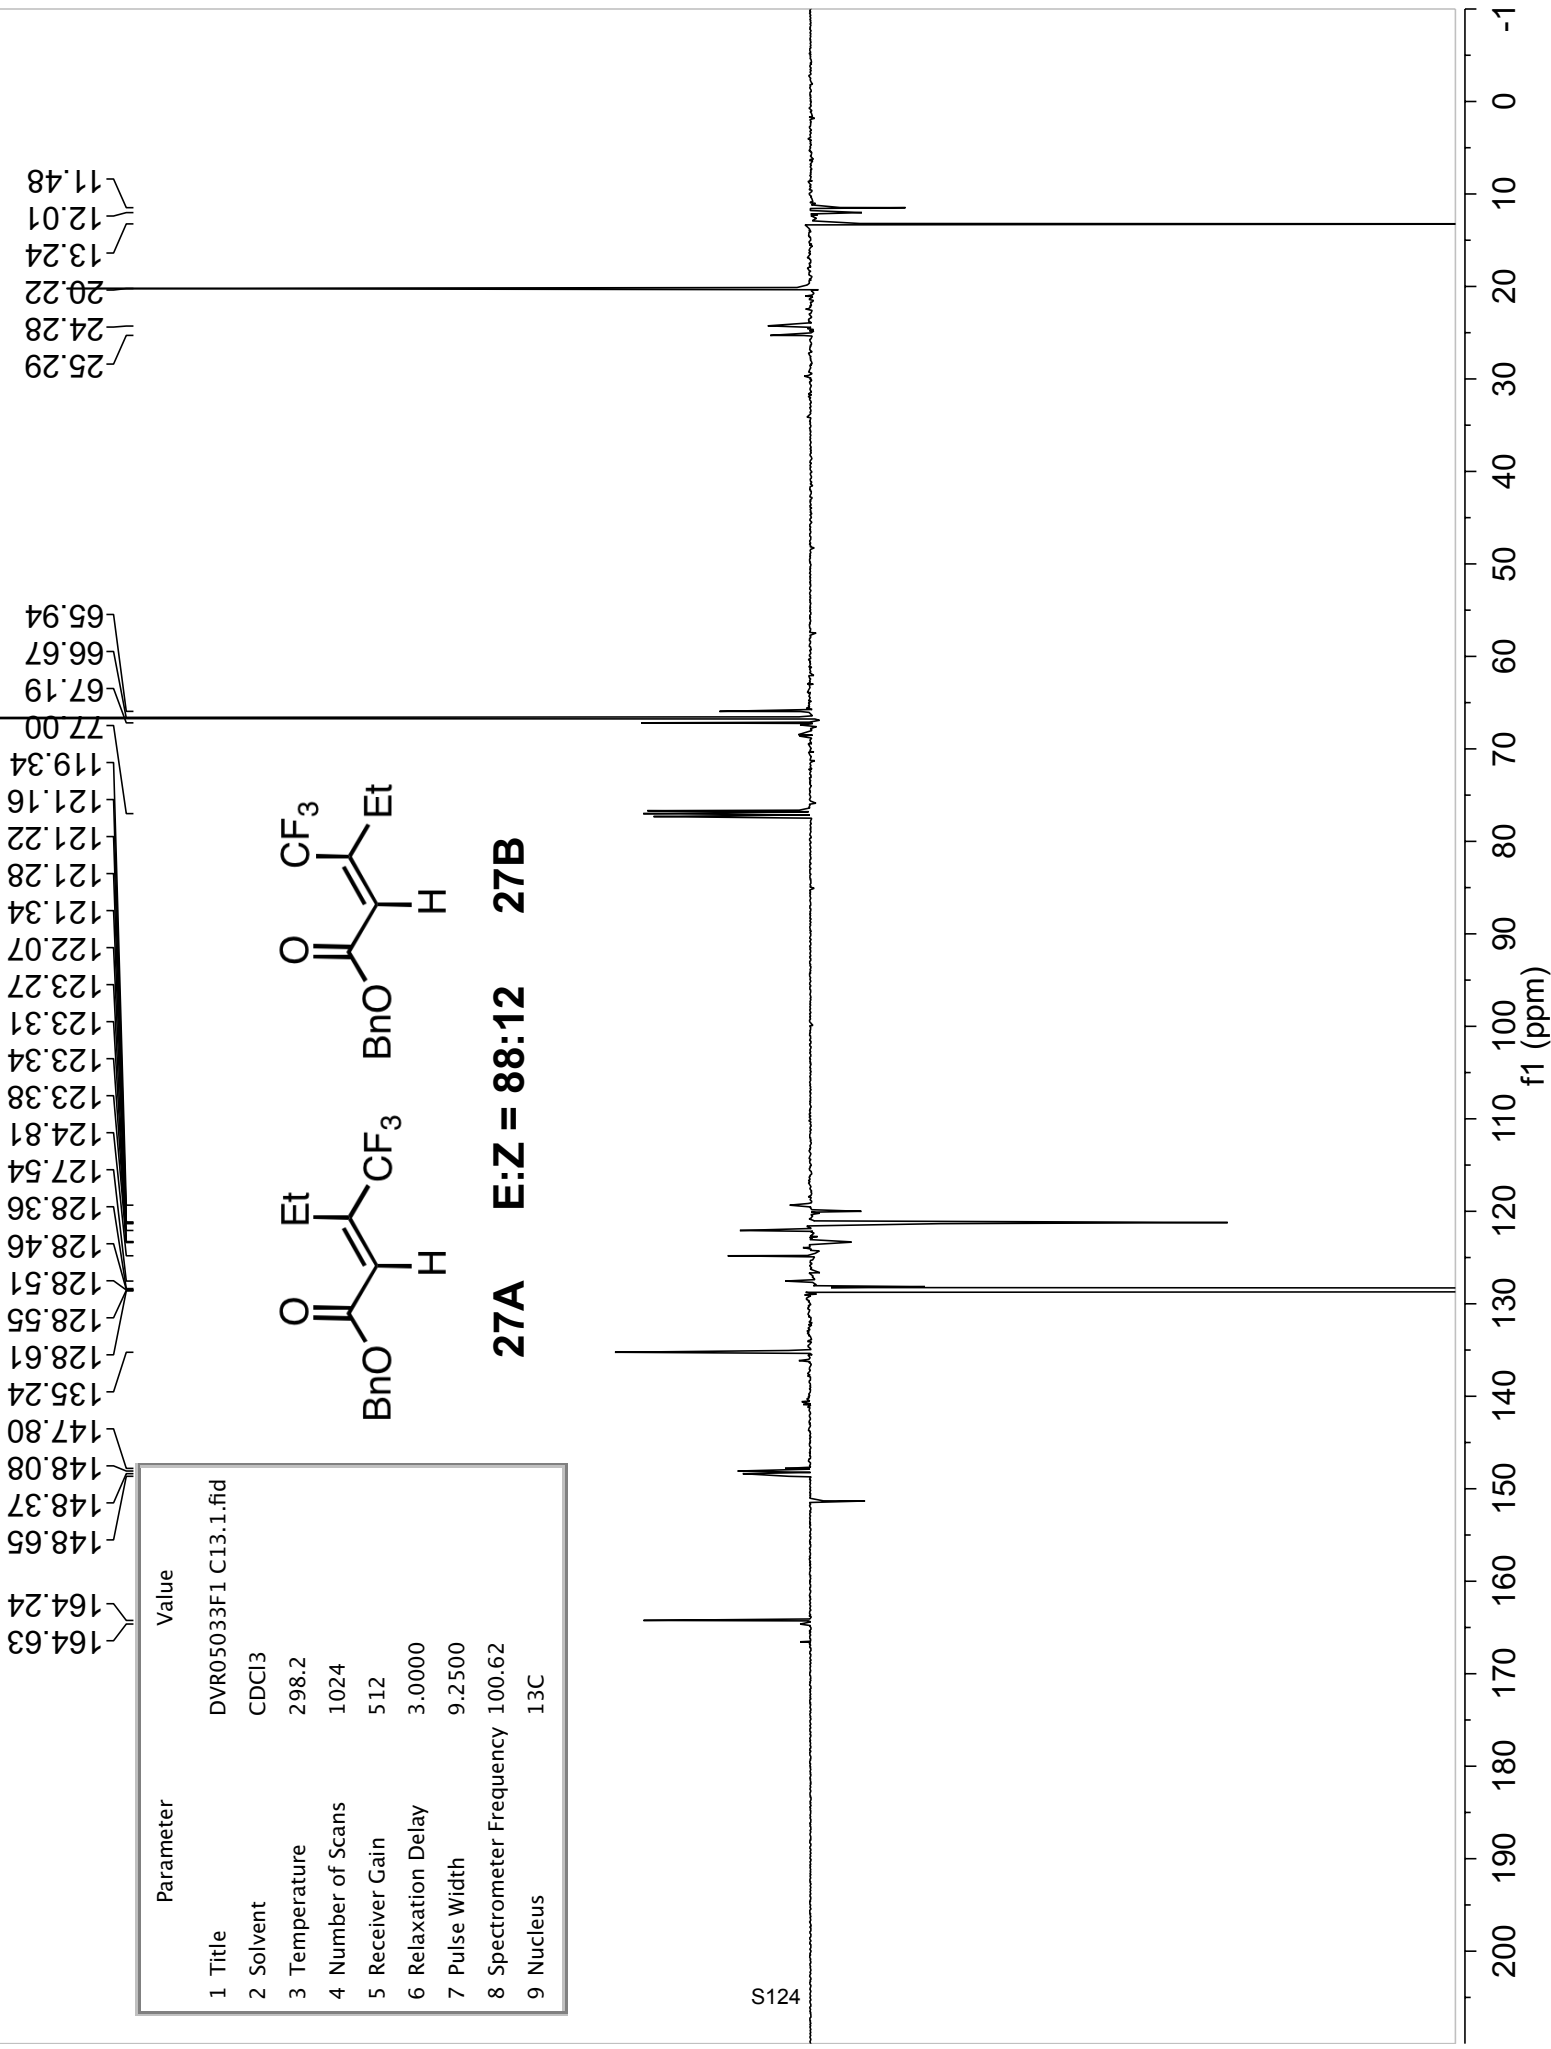

89.111  
81.111

33.522  
23.522

| Parameter        | Value               |
|------------------|---------------------|
| Title            | DVR03134F2A.2.fid   |
| Solvent          | CDCl3               |
| Temperature      | 298.2               |
| Number of Scans  | 64                  |
| Receiver Gain    | 18                  |
| Relaxation Delay | 2.0000              |
| Pulse Width      | 15.0000             |
| Acquisition Time | 2.0448              |
| Acquisition Date | 2015-06-04T08:00:00 |

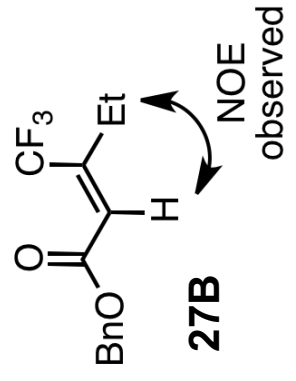

60.9

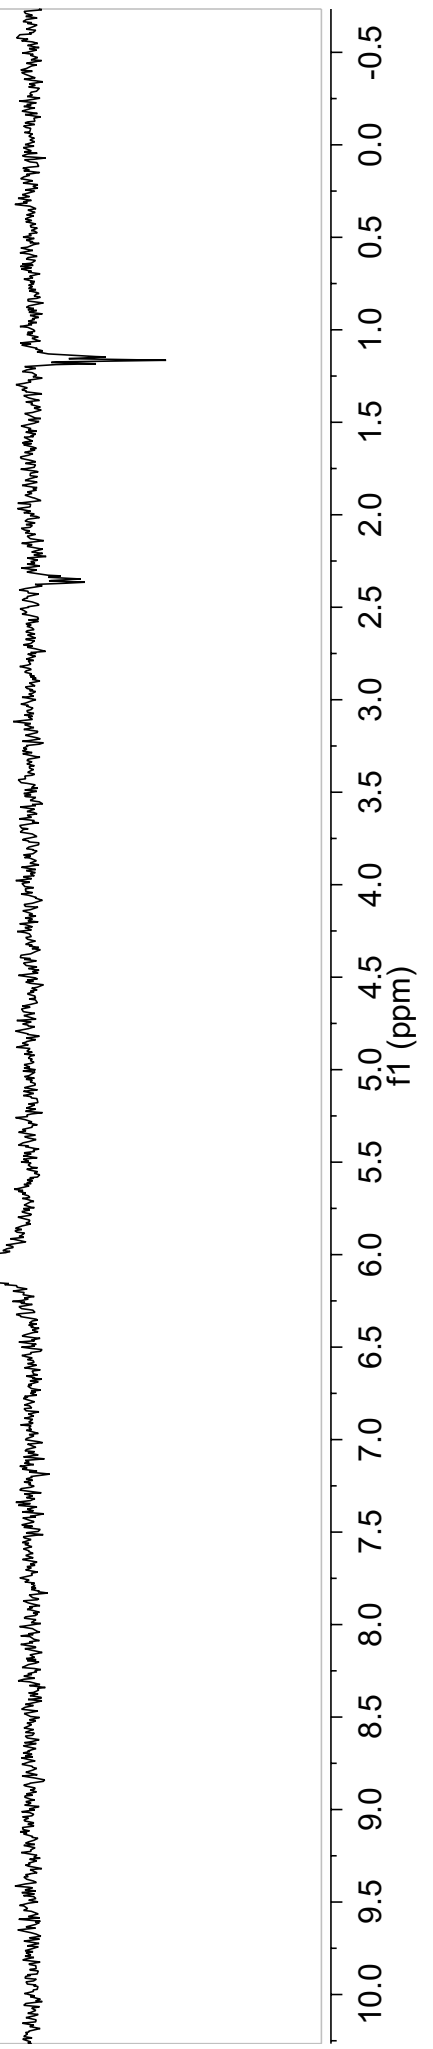

2.38  
2.37  
2.35  
2.33  
1.16  
1.15

6.09

| Parameter        | Value               |
|------------------|---------------------|
| Title            | DVR03134F2A.3.fid   |
| Solvent          | CDC13               |
| Temperature      | 298.2               |
| Number of Scans  | 64                  |
| Receiver Gain    | 25                  |
| Relaxation Delay | 2.0000              |
| Pulse Width      | 15.0000             |
| Acquisition Time | 2.0448              |
| Acquisition Date | 2015-06-04T08:07:00 |

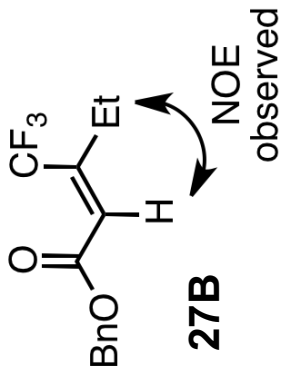

12 11 10 9 8 7 6 5 4 3 2 1 0 -1 -2 -3 -4 -5 -6 -7

1.15  
1.17  
1.18  
2.33  
2.37  
2.38

6.09

| Parameter        | Value               |
|------------------|---------------------|
| Title            | DVR03134F2A.4.fid   |
| Solvent          | CDCl3               |
| Temperature      | 298.2               |
| Number of Scans  | 64                  |
| Receiver Gain    | 25                  |
| Relaxation Delay | 2.0000              |
| Pulse Width      | 15.0000             |
| Acquisition Time | 2.0448              |
| Acquisition Date | 2015-06-04T08:14:00 |

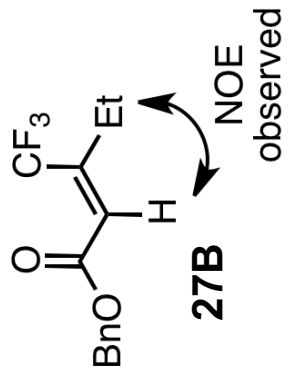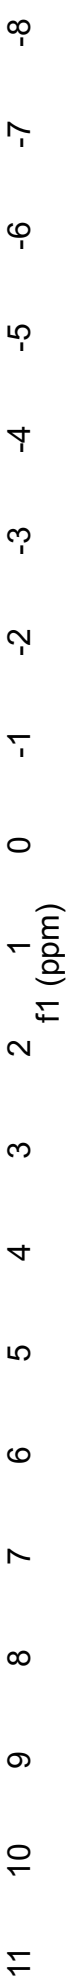

2.11  
2.09  
2.08  
2.07  
2.01  
2.01  
2.00  
2.00  
1.99  
1.99  
1.98  
1.97  
0.91  
0.90  
0.89  
0.87  
0.86  
0.85

| Parameter        | Value               |
|------------------|---------------------|
| Title            | DVR03142A2.2.fid    |
| Solvent          | C6D6                |
| Temperature      | 297.3               |
| Number of Scans  | 16                  |
| Receiver Gain    | 181                 |
| Relaxation Delay | 1.0000              |
| Pulse Width      | 10.7700             |
| Acquisition Time | 2.7263              |
| Acquisition Date | 2015-06-29T23:02:00 |

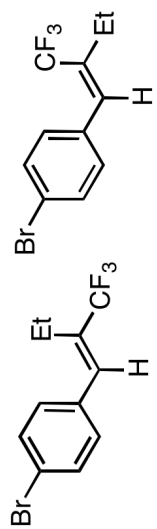

7.18  
7.18  
7.18  
7.16  
7.14  
7.13  
7.13  
7.12  
7.12  
7.11  
6.79  
6.77  
6.72  
6.56  
6.55  
6.12

0.49  
2.01  
0.78  
1.00  
2.03  
0.39  
2.16  
0.83  
3.13  
1.24

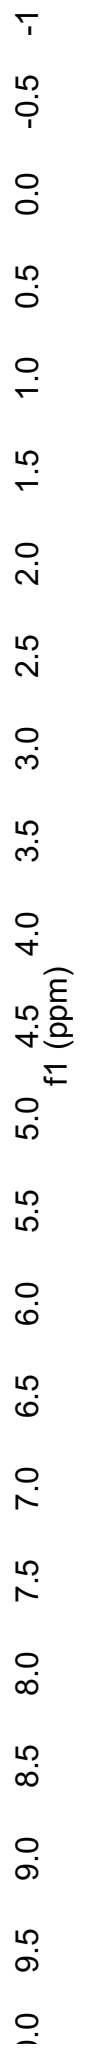



25.93  
19.80  
13.43  
13.15

121.28  
122.09  
122.15  
122.61  
123.10  
123.97  
124.93  
125.78  
126.76  
127.60  
130.15  
130.17  
130.19  
130.20  
130.51  
130.76  
130.81  
130.85  
130.89  
130.89  
131.33  
131.93  
132.70  
132.72  
132.75  
132.77  
133.06  
133.24  
133.42  
133.61  
134.39

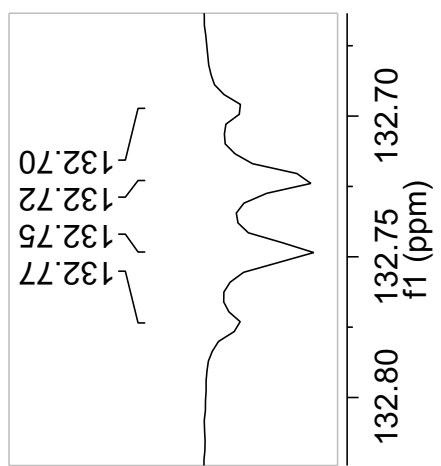

| Parameter        | Value               |
|------------------|---------------------|
| Title            | DVR03142A.3.fid     |
| Solvent          | CDCl3               |
| Temperature      | 300.0               |
| Number of Scans  | 1024                |
| Receiver Gain    | 2050                |
| Relaxation Delay | 5.0000              |
| Pulse Width      | 10.6300             |
| Acquisition Time | 0.9437              |
| Acquisition Date | 2015-06-17T05:49:00 |

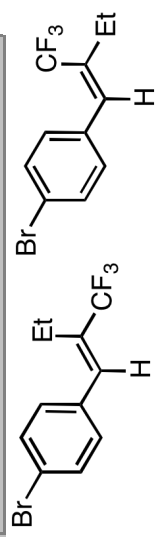

**28A E:Z = 72:28 28B**

S129

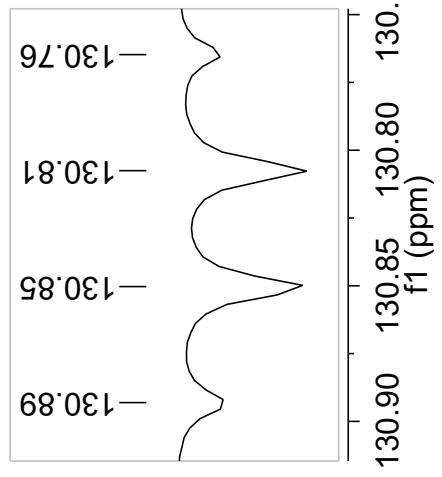

10 200 190 180 170 160 150 140 130 120 110 100 90 80 70 60 50 40 30 20 10 0 -1

59.43  
66.67

| Parameter        | Value               |
|------------------|---------------------|
| Title            | DVR03142A.2.fid     |
| Solvent          | CDCl3               |
| Temperature      | 300.0               |
| Number of Scans  | 16                  |
| Receiver Gain    | 181                 |
| Relaxation Delay | 3.0000              |
| Pulse Width      | 11.6200             |
| Acquisition Time | 0.4893              |
| Acquisition Date | 2015-06-16T16:16:00 |

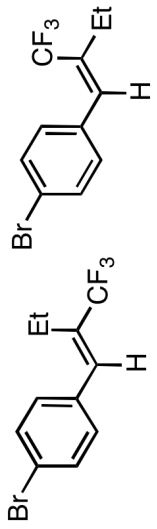

**28A E:Z = 72:28 28B**

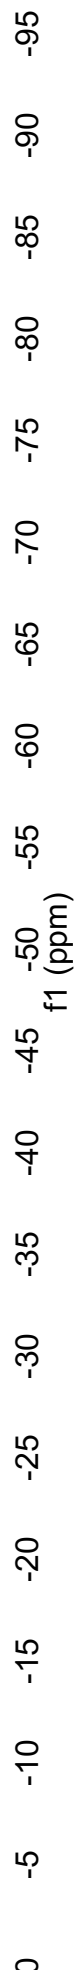

6.73

| Parameter        | Value                |
|------------------|----------------------|
| Title            | DVR03142A2 NOE.2.fid |
| Solvent          | C6D6                 |
| Temperature      | 298.1                |
| Number of Scans  | 64                   |
| Receiver Gain    | 16                   |
| Relaxation Delay | 2.0000               |
| Pulse Width      | 15.0000              |
| Acquisition Time | 2.0448               |
| Acquisition Date | 2015-06-30T18:08:00  |

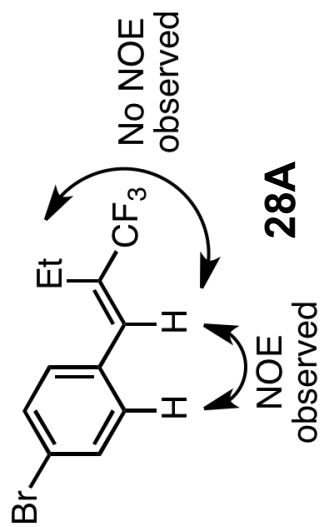

**28A**

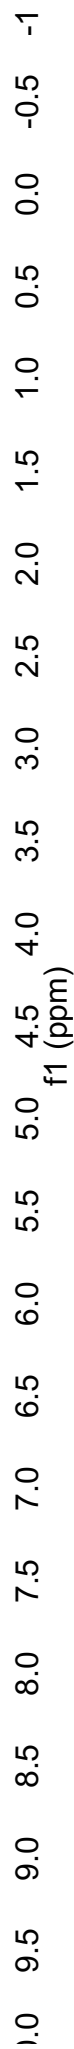

0.88  
0.86  
0.85

2.02  
2.01  
1.99  
1.97

6.79  
6.77

| Parameter        | Value                |
|------------------|----------------------|
| Title            | DVR03142A2 NOE.3.fid |
| Solvent          | C6D6                 |
| Temperature      | 298.1                |
| Number of Scans  | 64                   |
| Receiver Gain    | 28                   |
| Relaxation Delay | 2.0000               |
| Pulse Width      | 15.0000              |
| Acquisition Time | 2.0448               |
| Acquisition Date | 2015-06-30T18:15:00  |

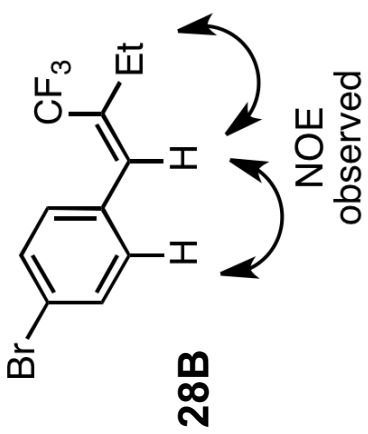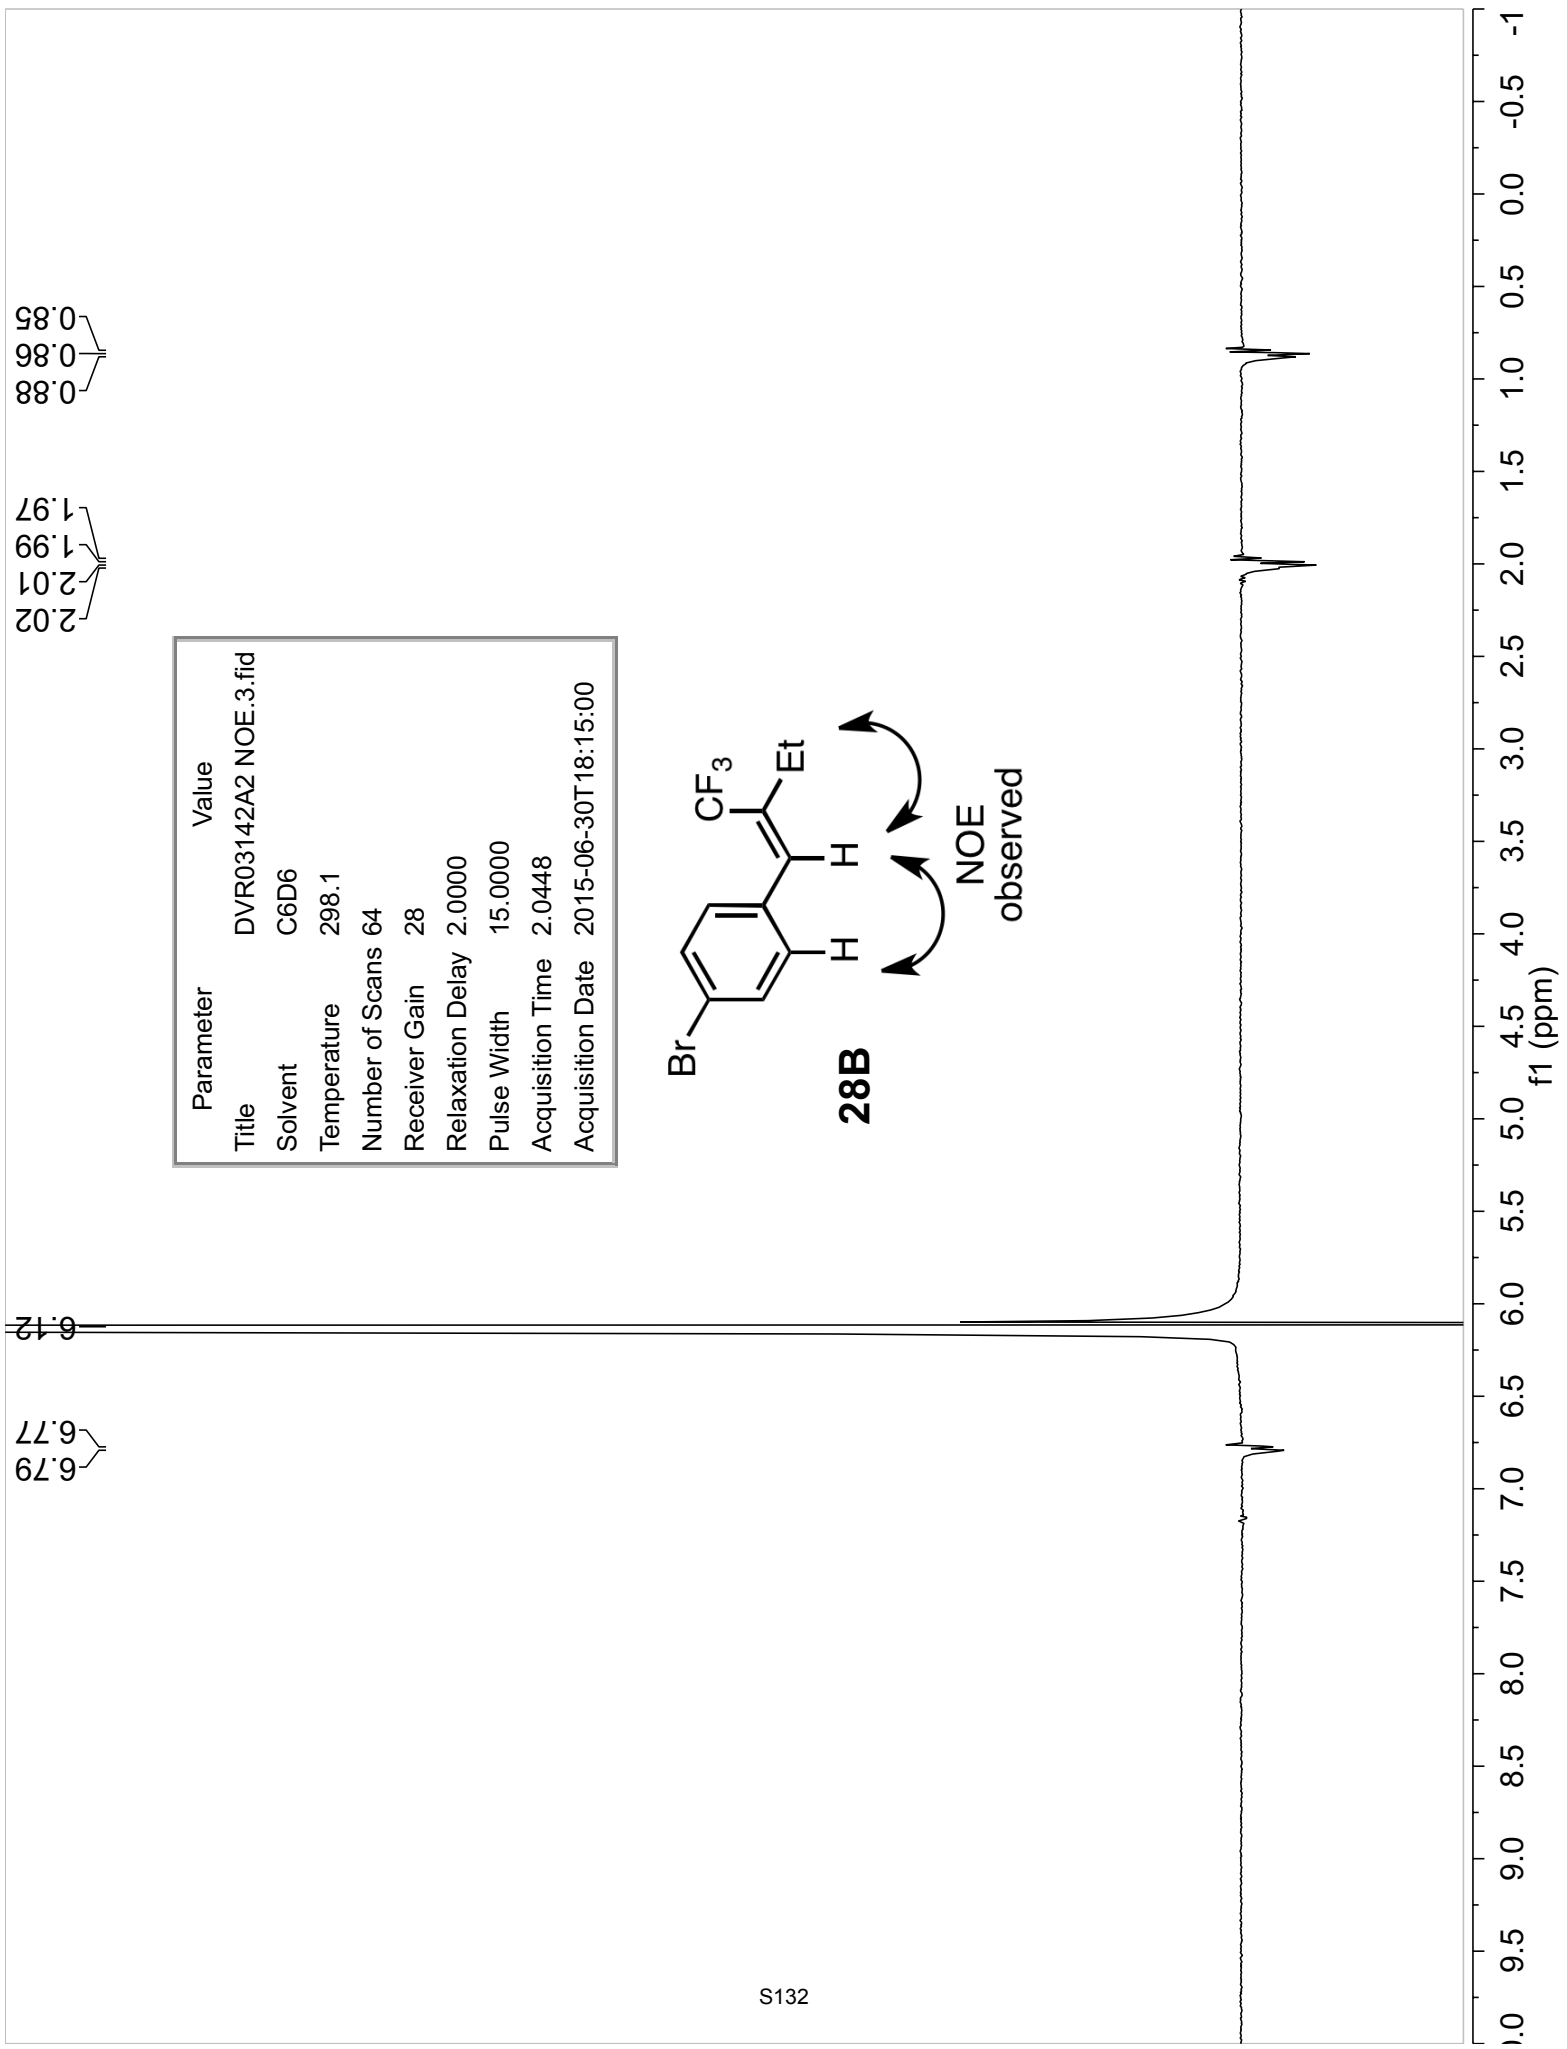

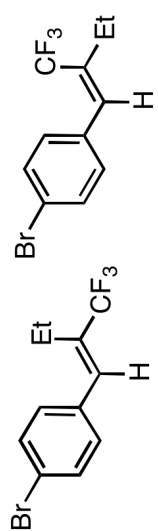

**28A E:Z = 72:28 28B**

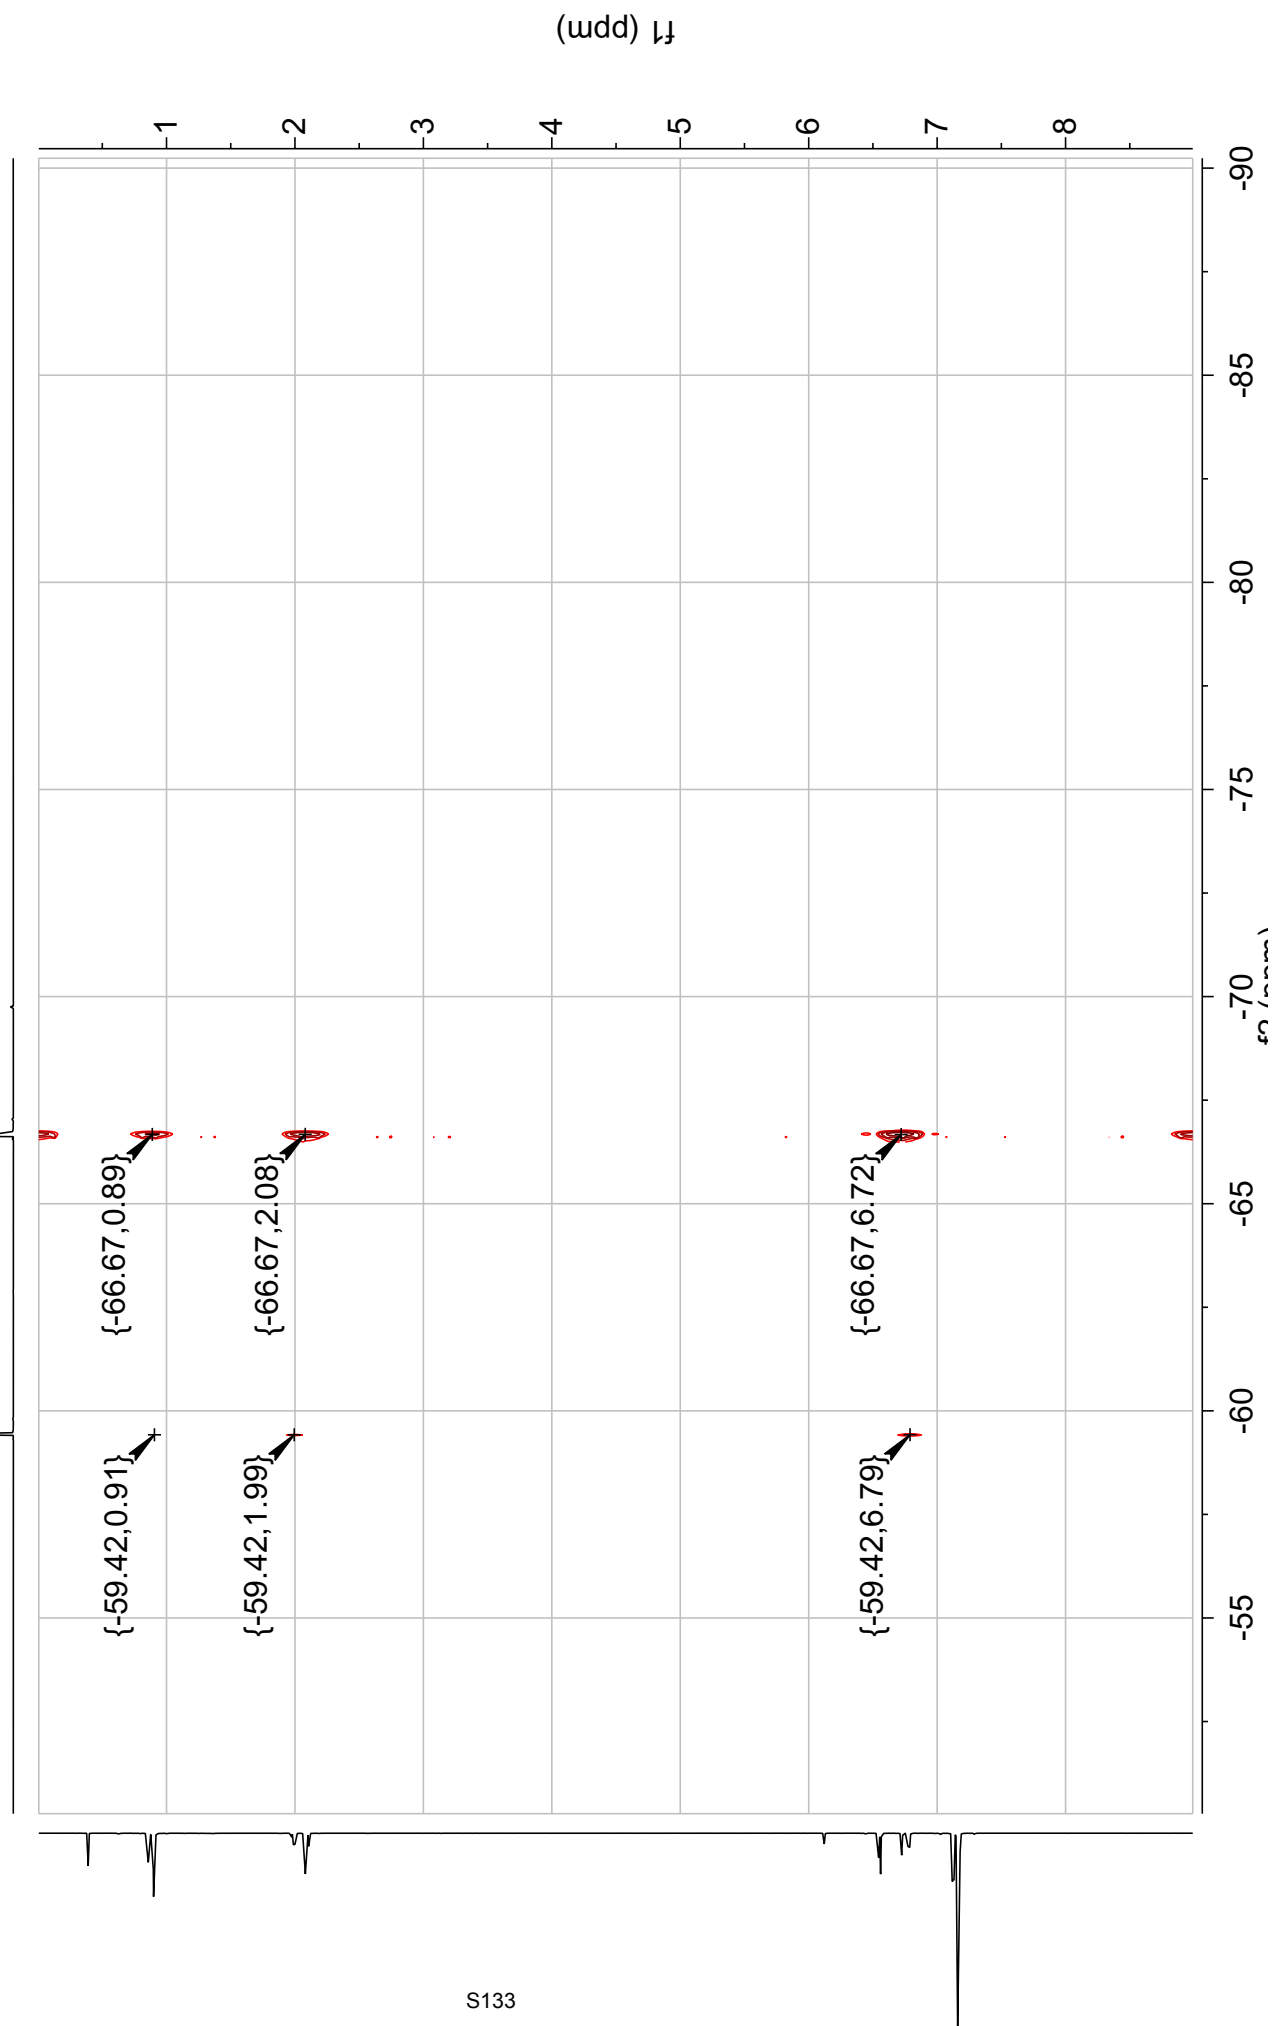

(u,dd) 1,3

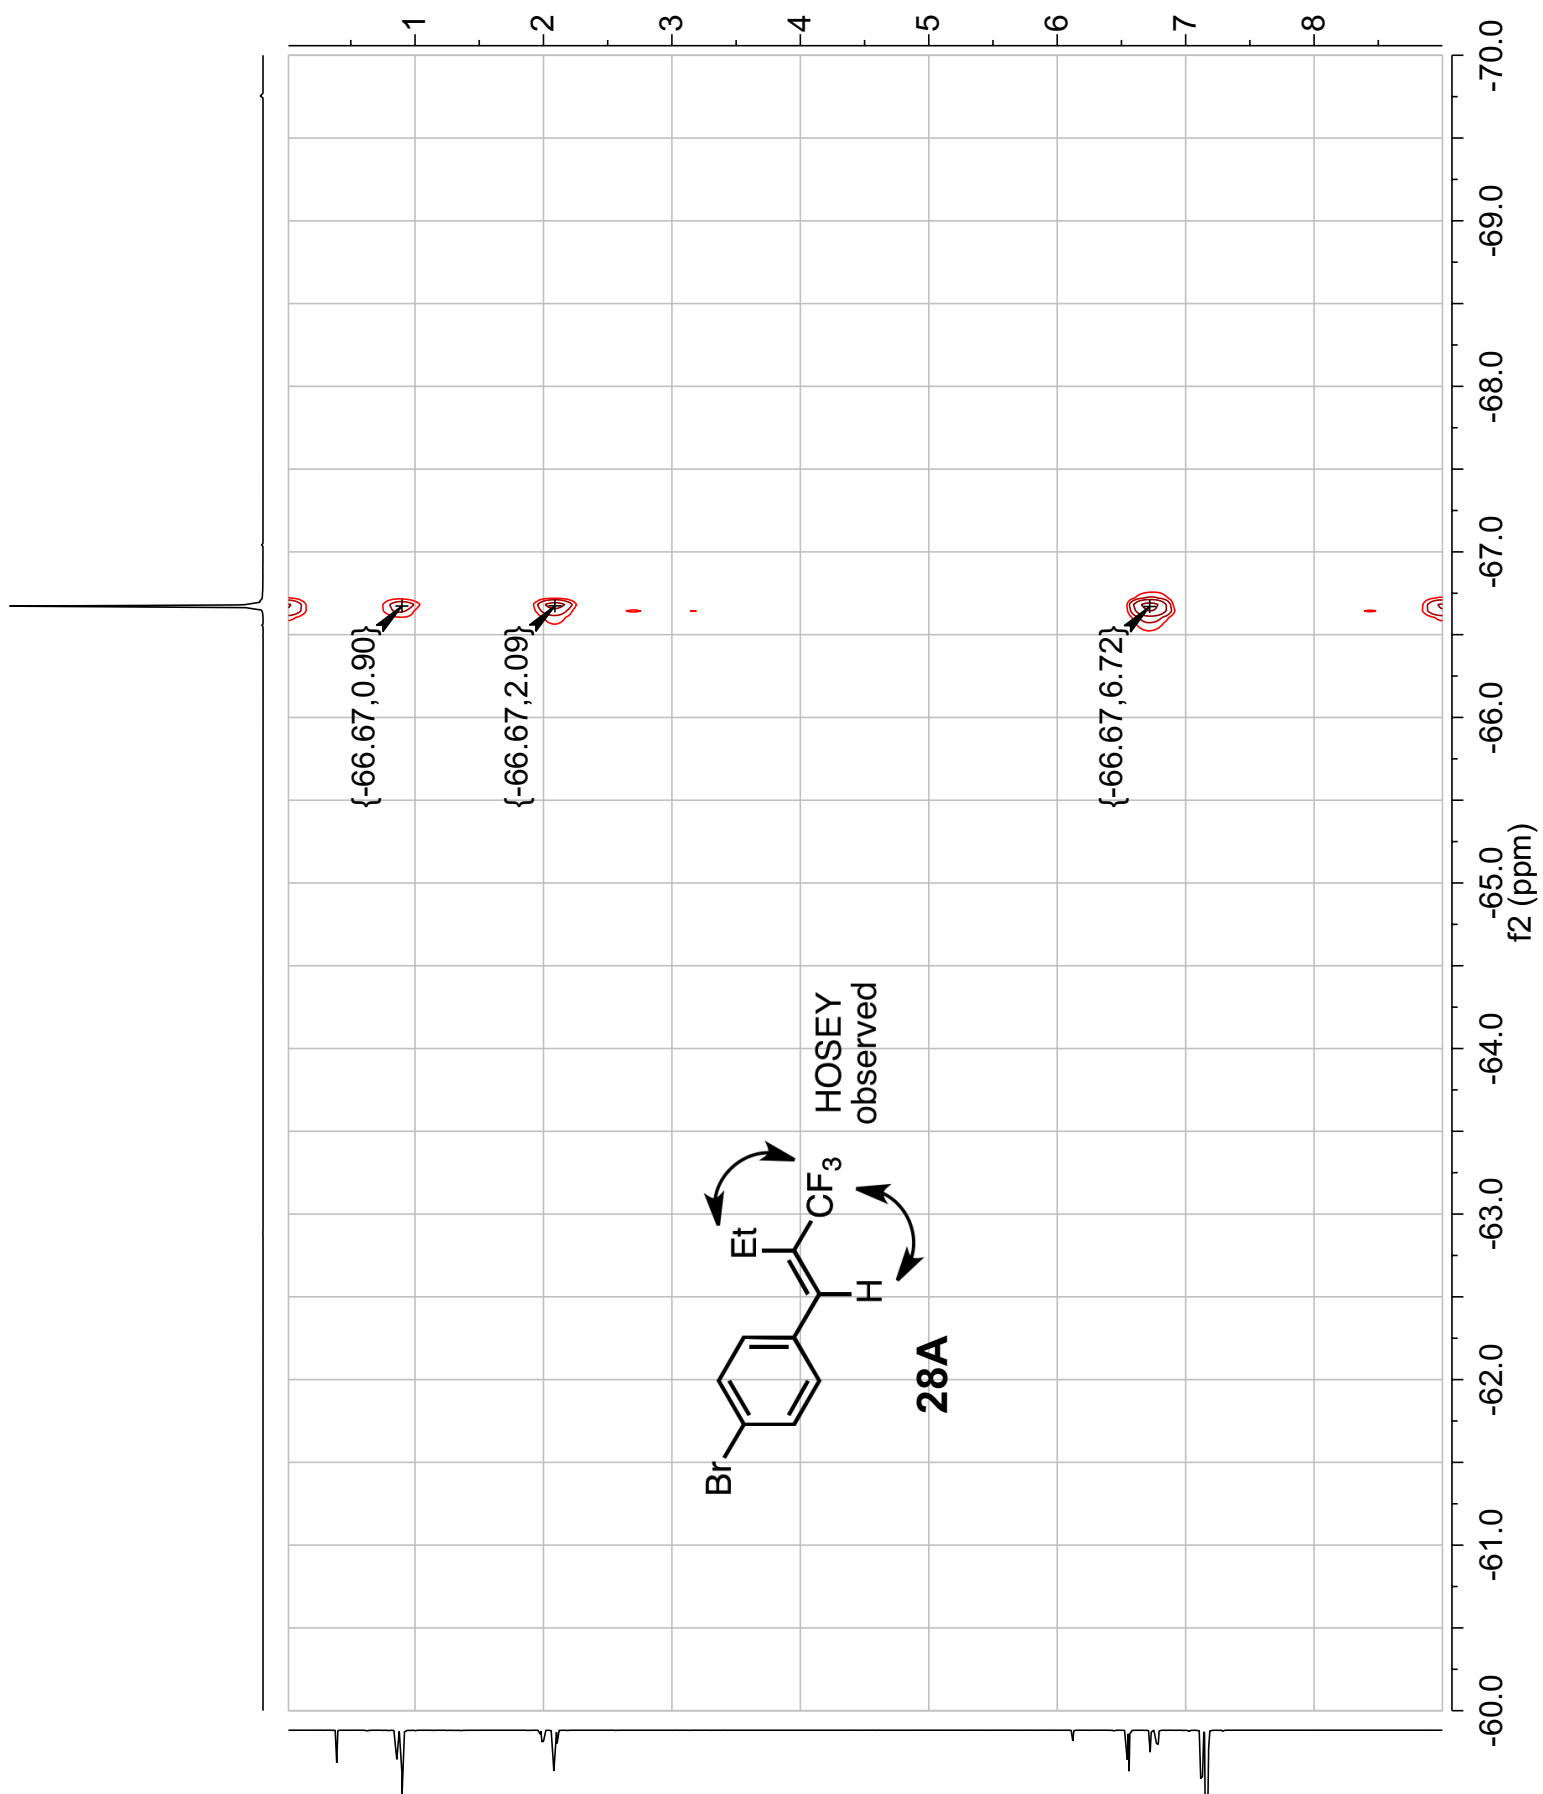

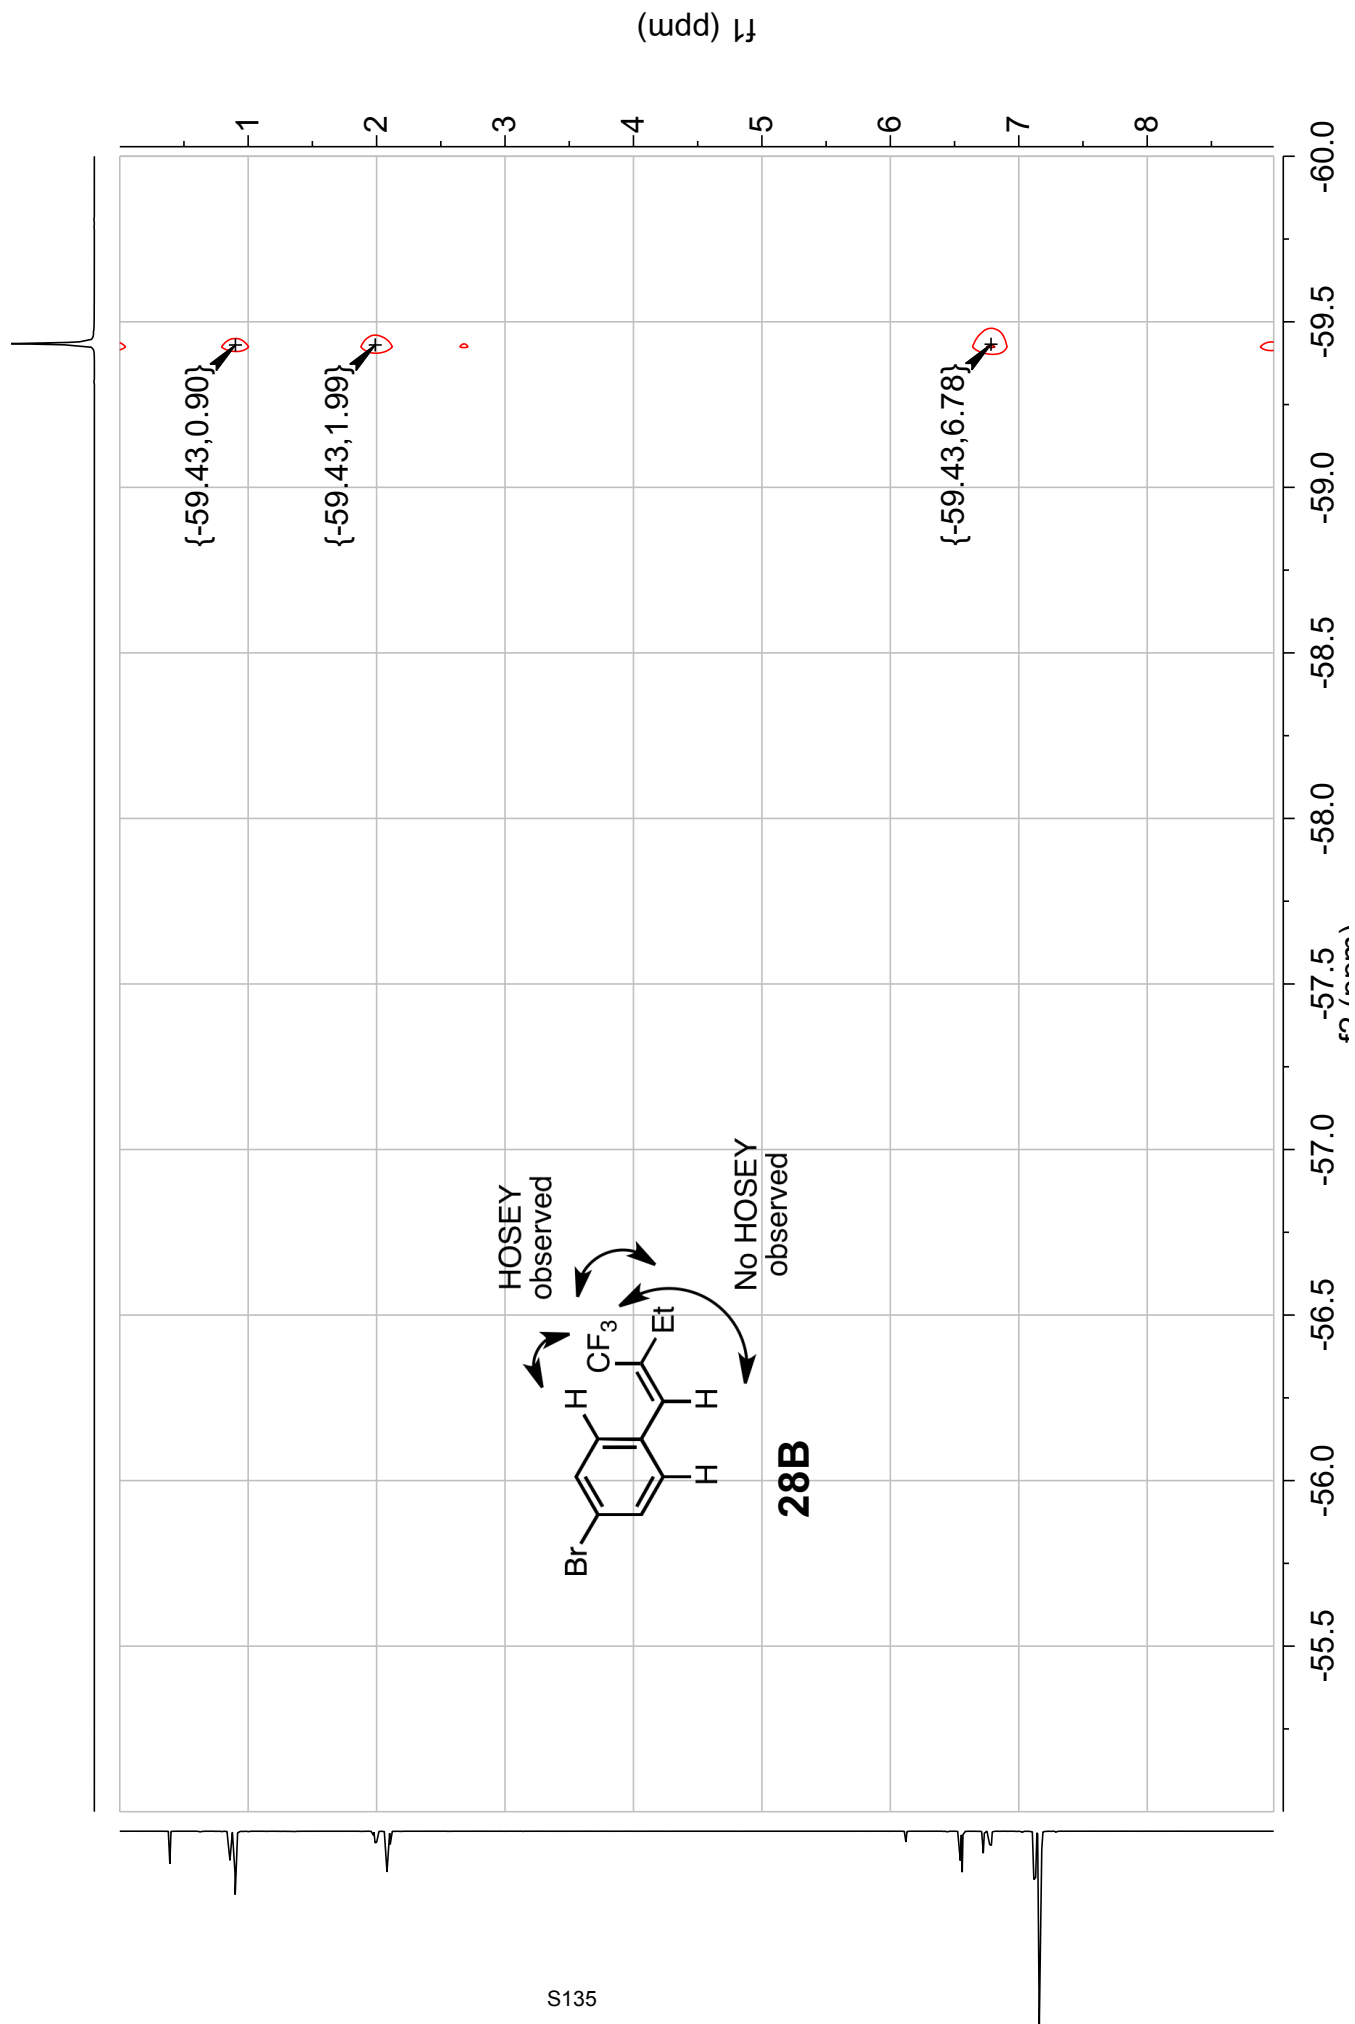

3.02  
2.93  
2.80  
2.78  
2.76  
2.74  
2.72  
2.67  
2.65  
2.64  
2.60  
2.58  
2.57  
2.55  
2.54  
2.53  
2.51  
2.50  
2.49  
2.48  
2.46  
2.33  
2.32  
2.30  
2.29  
2.28  
2.26  
2.24  
2.22  
2.20  
2.19  
2.18  
2.17  
2.15  
2.13  
2.12  
2.11  
2.10  
2.07

| Parameter        | Value               |
|------------------|---------------------|
| Title            | AAG-08210-C         |
| Solvent          | CDCl3               |
| Temperature      | 298.2               |
| Number of Scans  | 16                  |
| Receiver Gain    | 11                  |
| Relaxation Delay | 1.0000              |
| Pulse Width      | 15.0000             |
| Acquisition Time | 3.9584              |
| Acquisition Date | 2015-05-28T18:22:00 |
| Frequency        | 400.13              |
| Nucleus          | 1H                  |

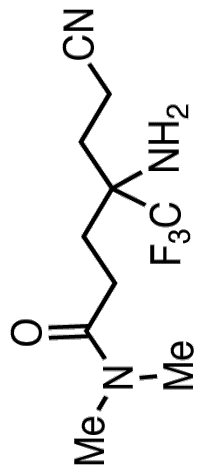

**29**

3.00  
3.09  
1.10  
1.17  
2.04  
4.31

1.0 9.5 9.0 8.5 8.0 7.5 7.0 6.5 6.0 5.5 5.0 4.5 4.0 3.5 3.0 2.5 2.0 1.5 1.0 0.5 0.0 -0.5 -1

f1 (ppm)



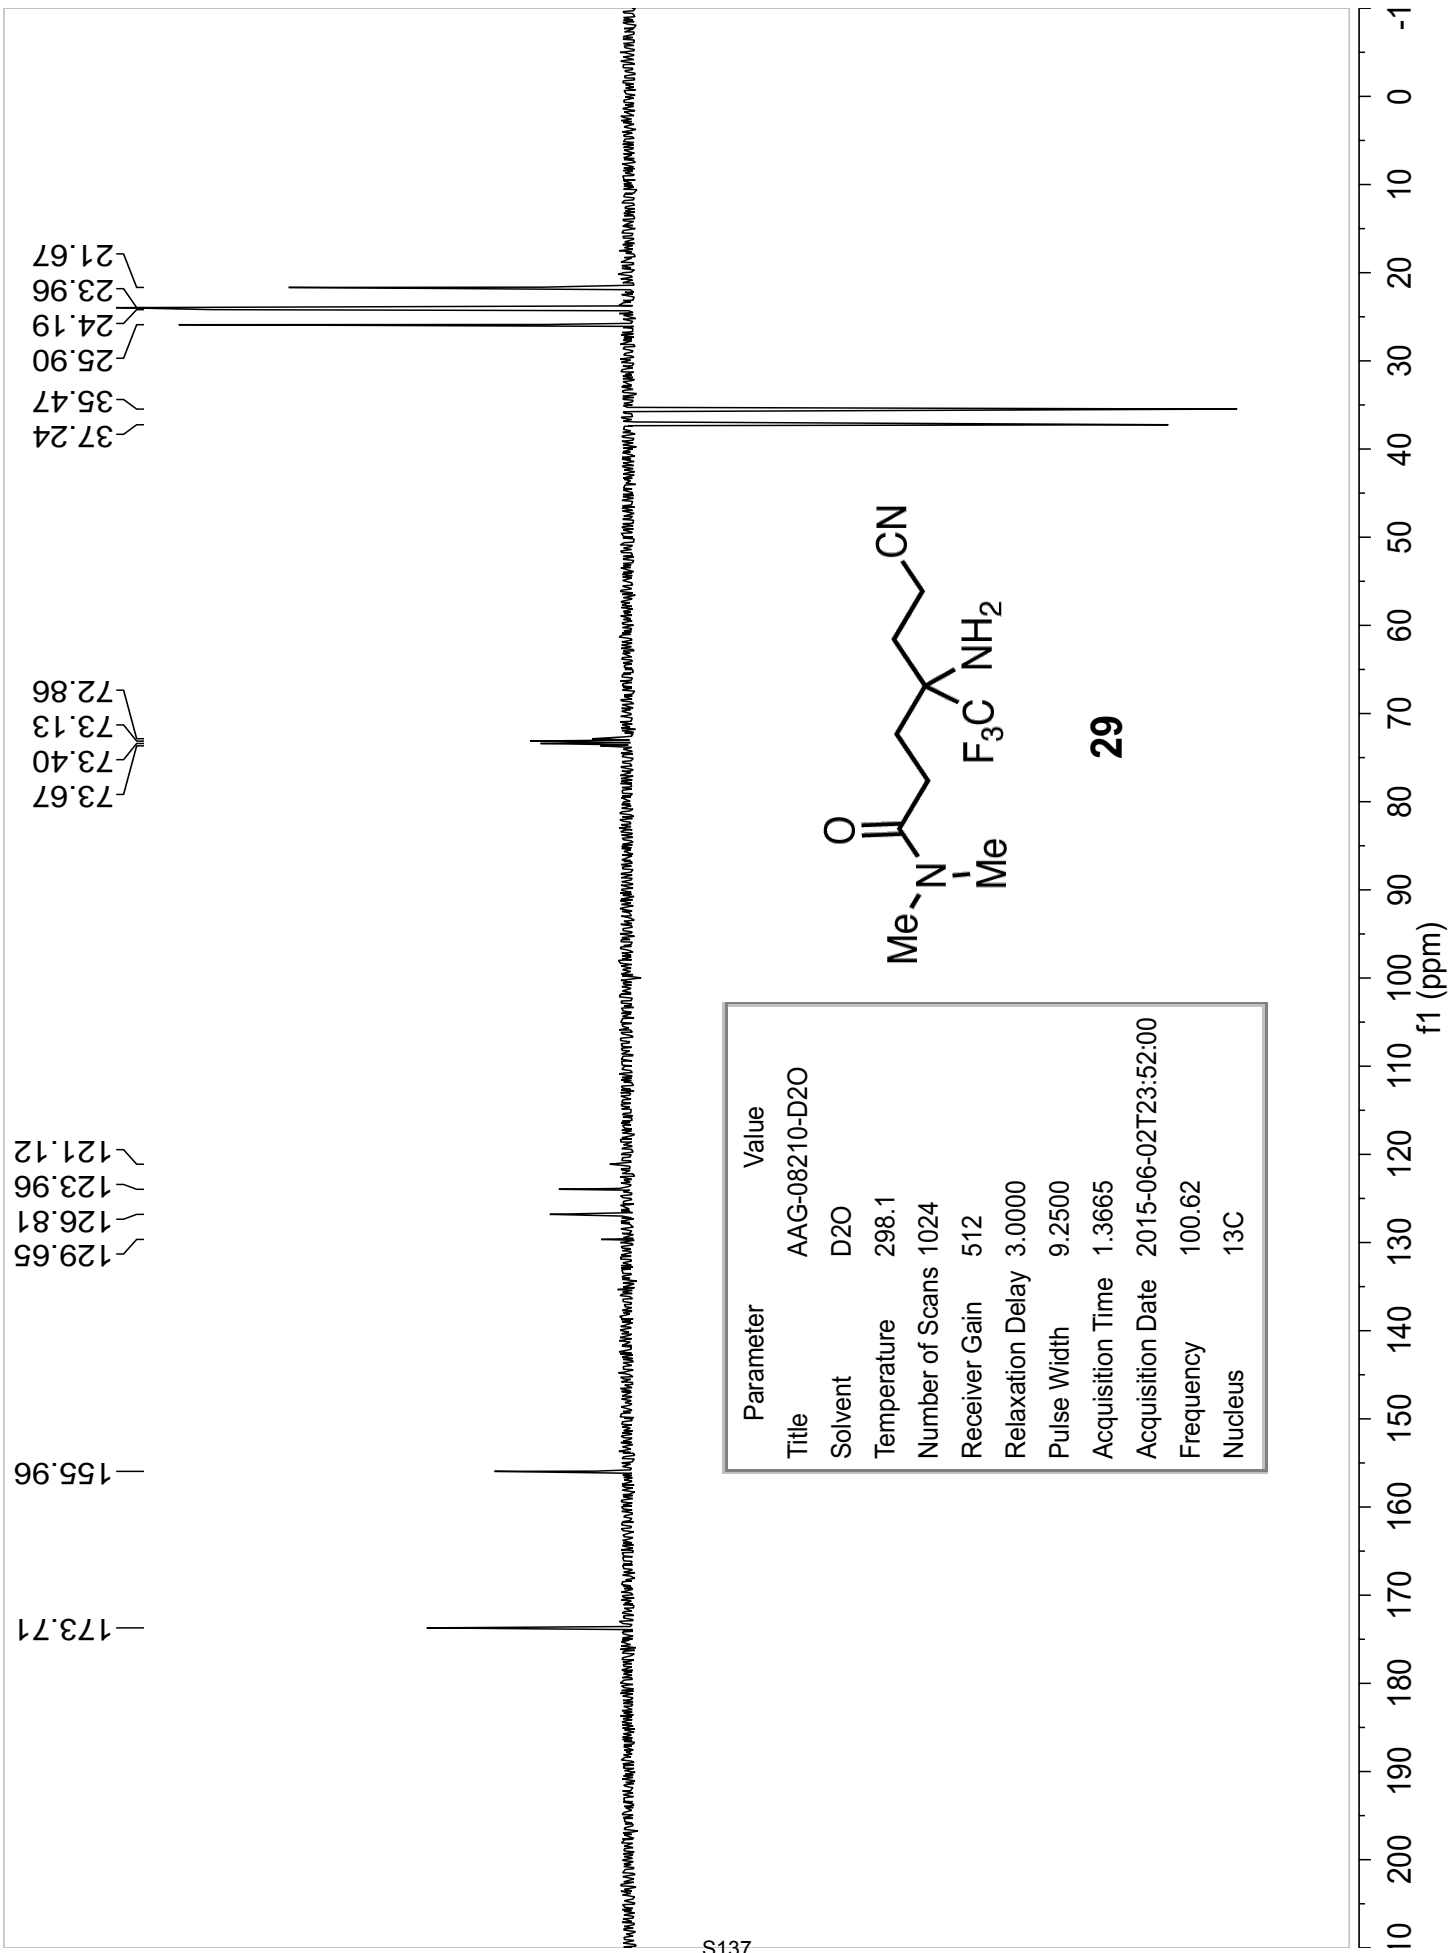

76.92

| Parameter        | Value               |
|------------------|---------------------|
| Title            | AAG-08210-C         |
| Solvent          | CDCl <sub>3</sub>   |
| Temperature      | 298.2               |
| Number of Scans  | 16                  |
| Receiver Gain    | 1626                |
| Relaxation Delay | 2.0000              |
| Pulse Width      | 15.0300             |
| Acquisition Time | 0.8717              |
| Acquisition Date | 2015-05-28T18:25:00 |
| Frequency        | 376.46              |
| Nucleus          | <sup>19</sup> F     |

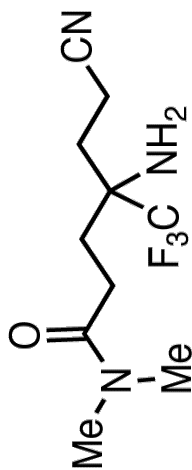

29

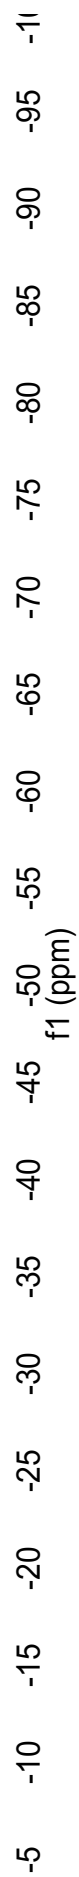

7.58  
7.56  
7.35  
7.33  
5.62  
4.30  
3.15  
3.14  
3.11  
3.10  
2.60  
2.59  
2.58  
2.56  
2.56  
2.54  
2.18  
2.17  
2.15  
2.14  
1.95  
1.94  
1.92  
1.91  
1.90  
1.78  
1.77  
1.76  
1.75  
1.74  
1.73  
1.72  
1.71  
1.70  
1.68  
1.67  
1.66  
1.66  
1.64  
1.63  
1.60  
1.59  
1.58  
1.56  
1.55  
1.53  
1.51  
1.48  
1.47  
1.46  
1.45  
1.44  
1.43

| Parameter        | Value               |
|------------------|---------------------|
| Title            | AAG-08223-C         |
| Solvent          | CDCl3               |
| Temperature      | 298.2               |
| Number of Scans  | 16                  |
| Receiver Gain    | 4                   |
| Relaxation Delay | 1.0000              |
| Pulse Width      | 15.0000             |
| Acquisition Time | 3.9584              |
| Acquisition Date | 2015-06-09T18:36:00 |
| Frequency        | 400.13              |
| Nucleus          | 1H                  |

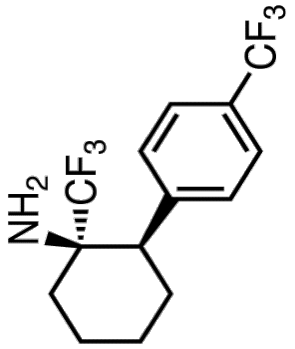

30

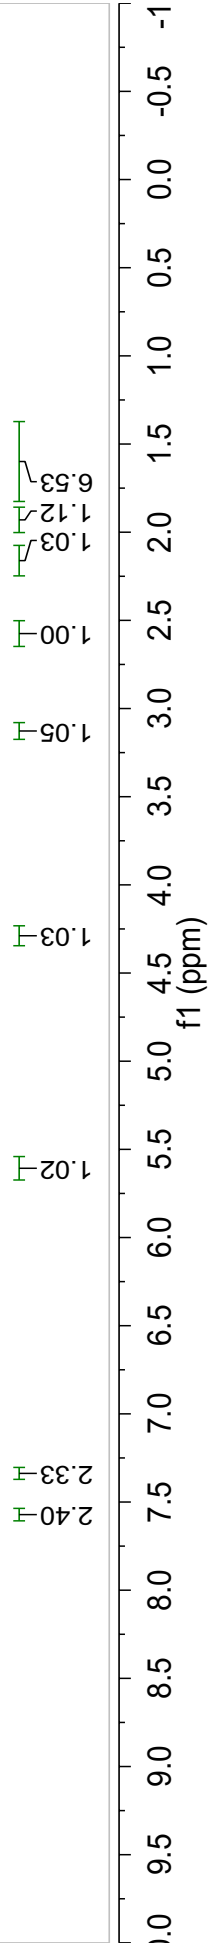

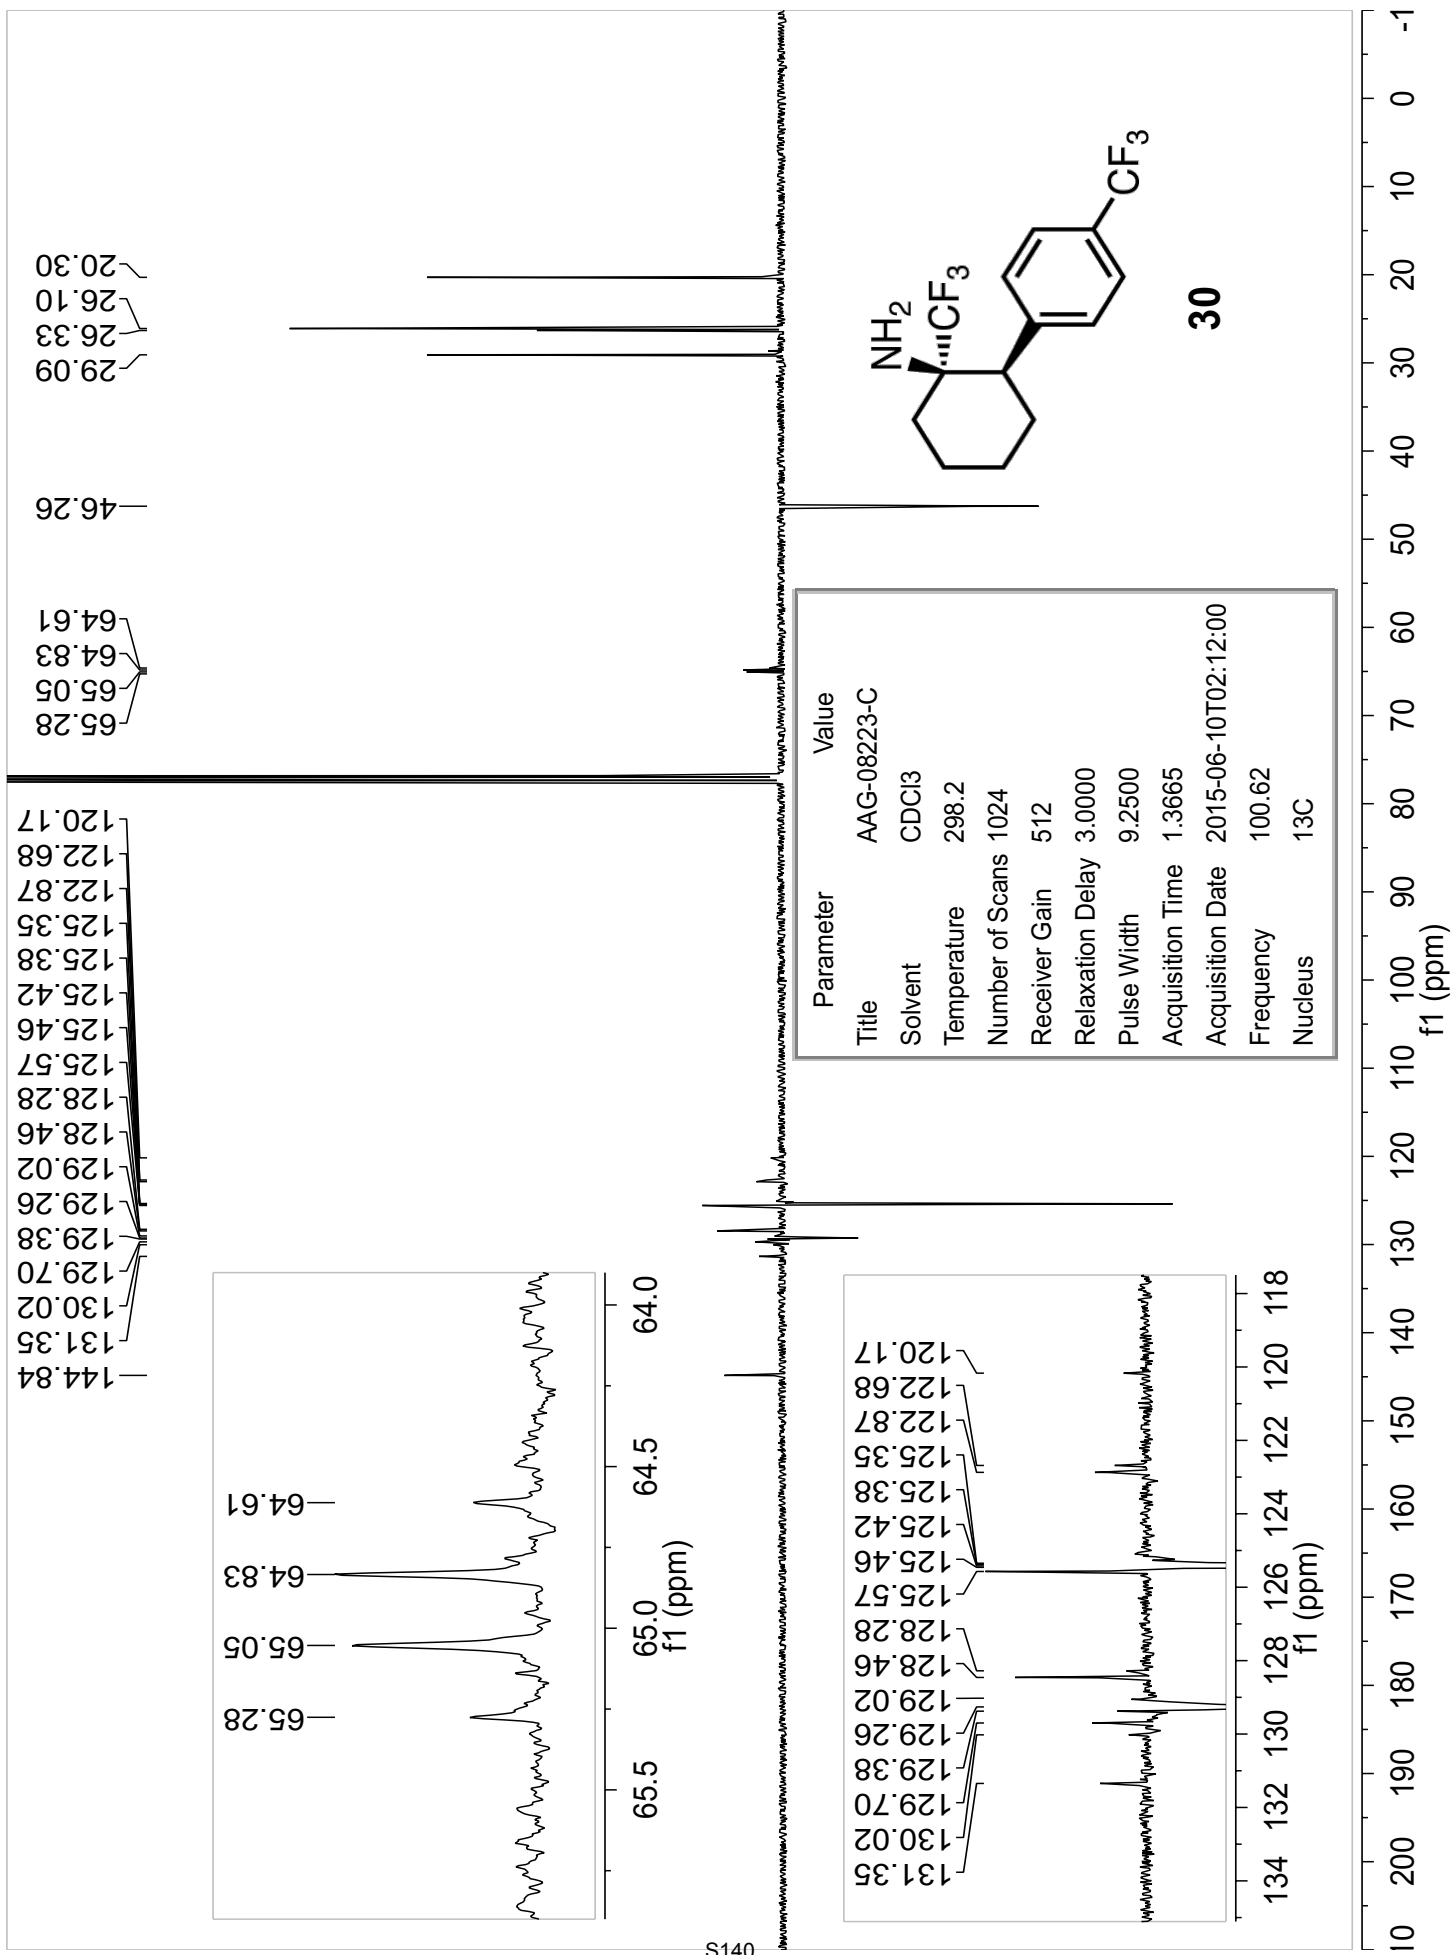

| Parameter        | Value               |
|------------------|---------------------|
| Title            | AAG-07223-B         |
| Solvent          | CDCl3               |
| Temperature      | 298.0               |
| Number of Scans  | 16                  |
| Receiver Gain    | 362                 |
| Relaxation Delay | 3.0000              |
| Pulse Width      | 11.6200             |
| Acquisition Time | 0.4893              |
| Acquisition Date | 2015-03-18T19:13:00 |
| Frequency        | 564.81              |
| Nucleus          | 19F                 |

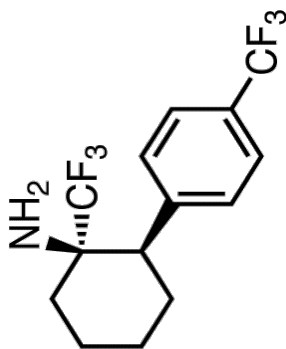

**30**

-78.45

-69.48



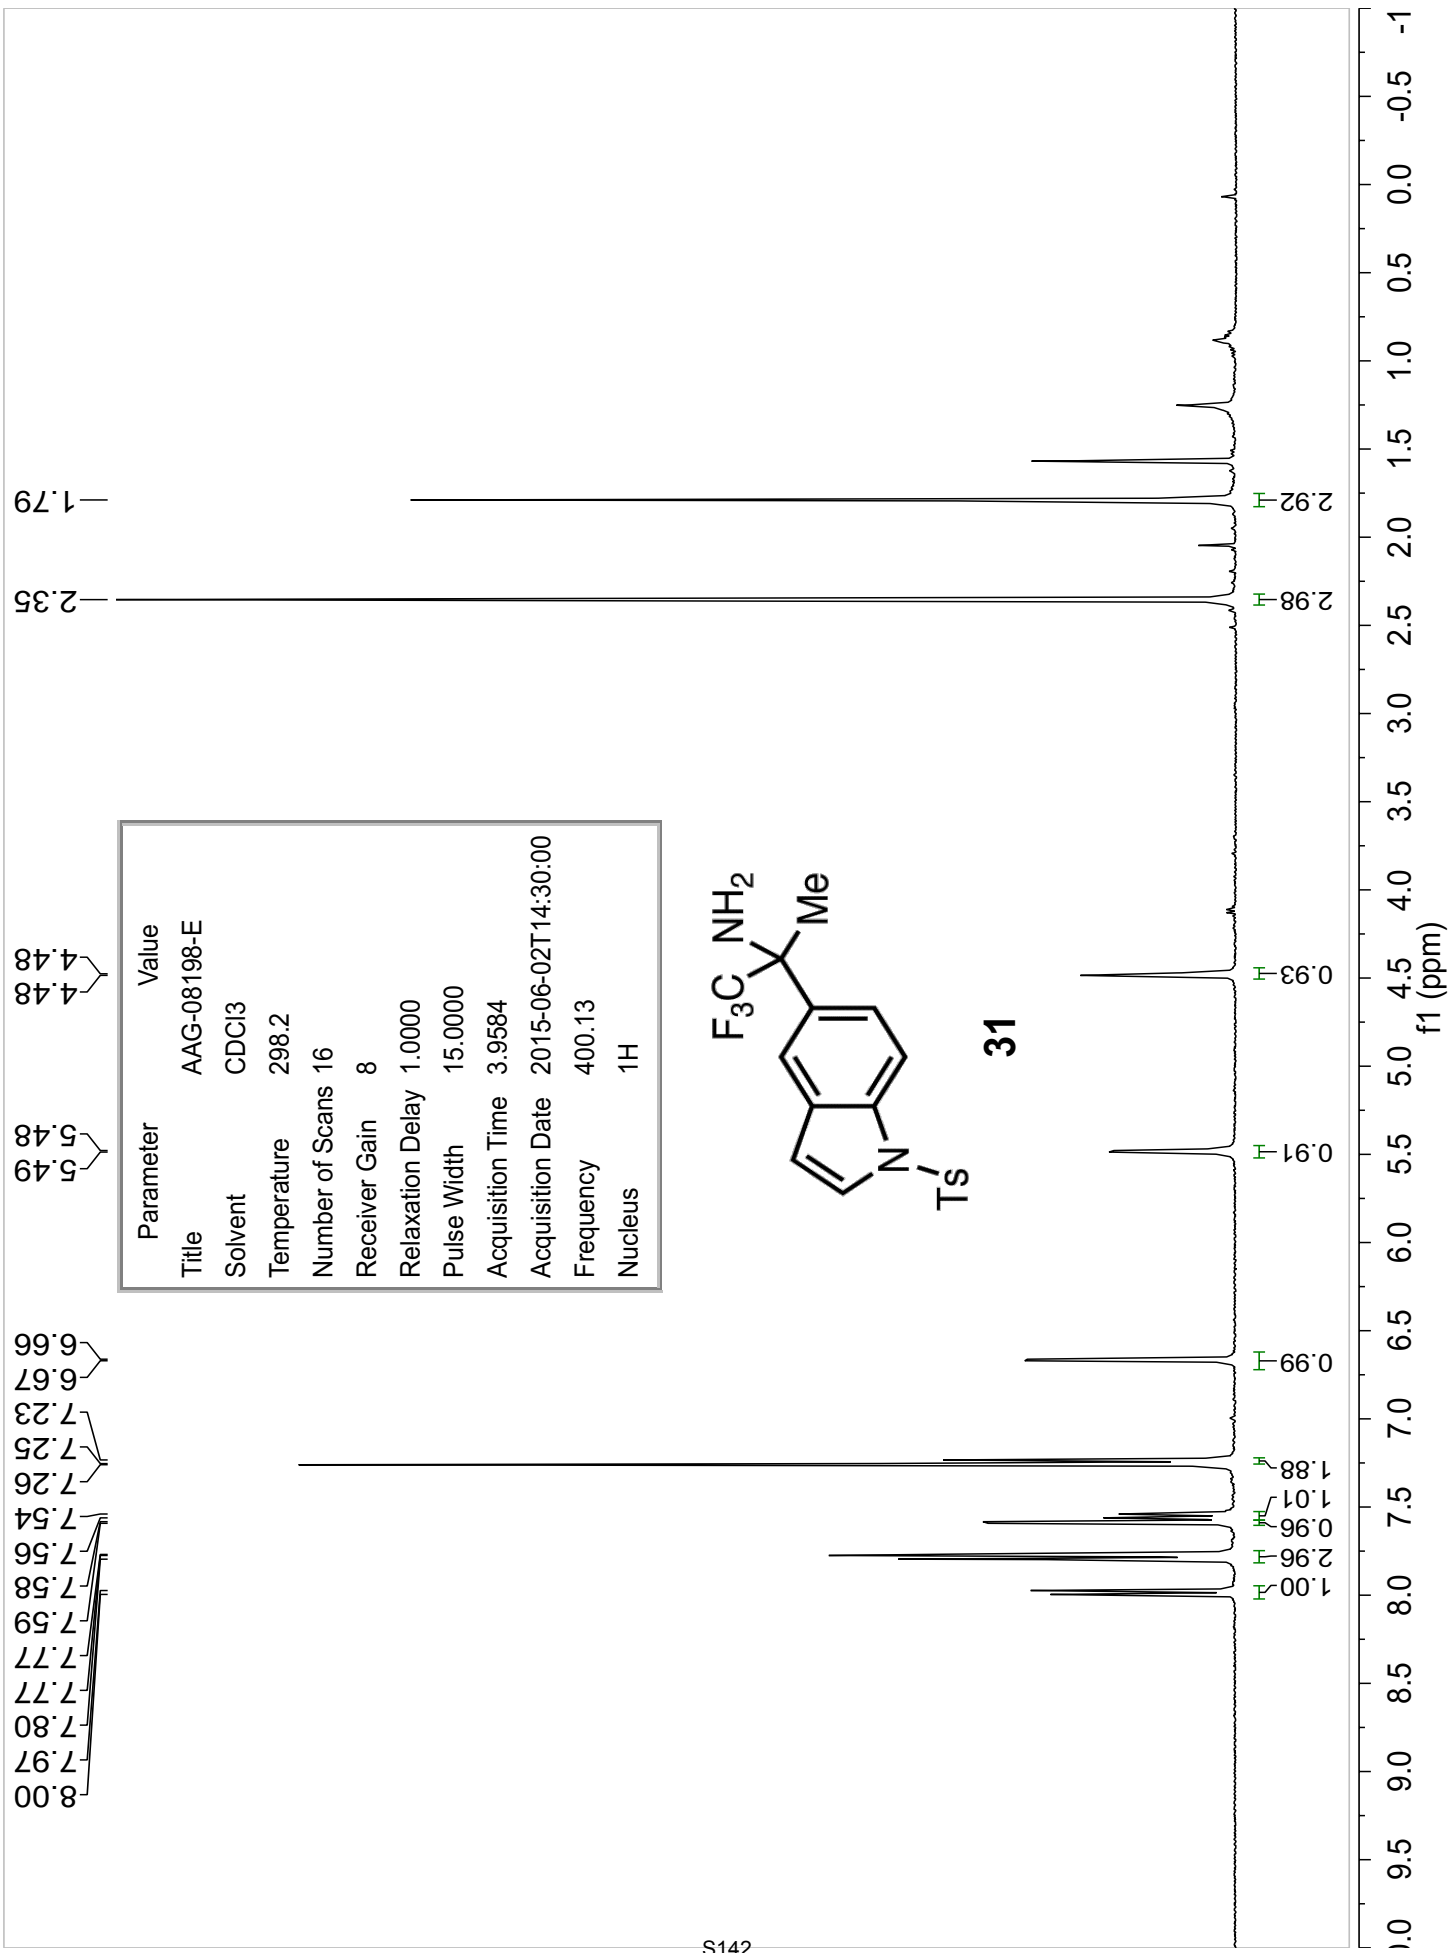

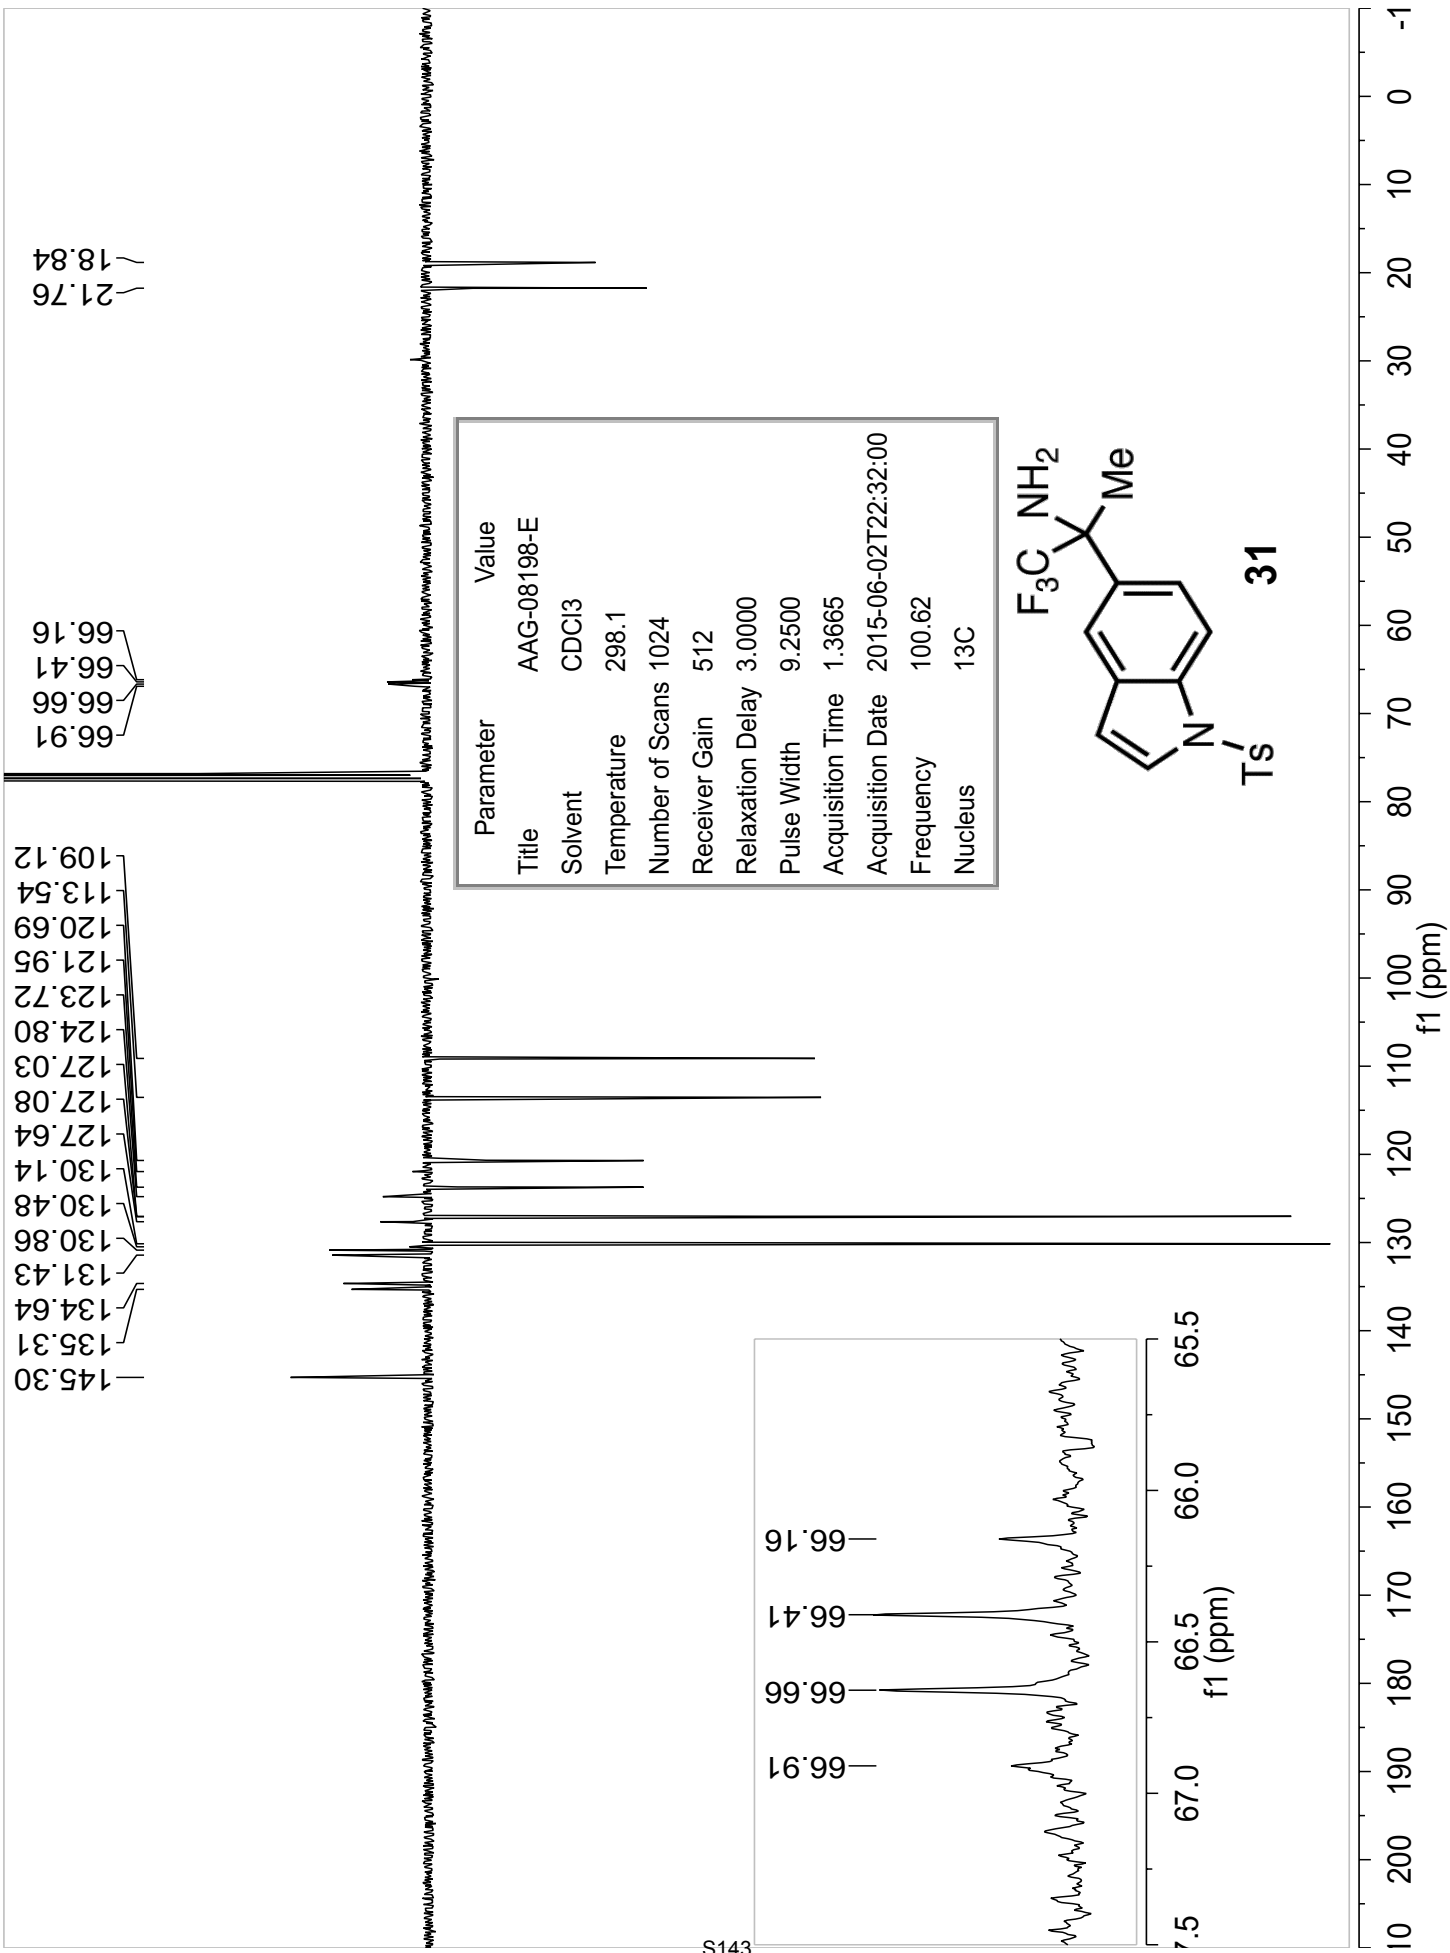

| Parameter        | Value               |
|------------------|---------------------|
| Title            | AAG-08198-E         |
| Solvent          | CDCl <sub>3</sub>   |
| Temperature      | 298.1               |
| Number of Scans  | 16                  |
| Receiver Gain    | 1626                |
| Relaxation Delay | 2.0000              |
| Pulse Width      | 15.0300             |
| Acquisition Time | 0.8717              |
| Acquisition Date | 2015-06-02T14:33:00 |
| Frequency        | 376.46              |
| Nucleus          | <sup>19</sup> F     |

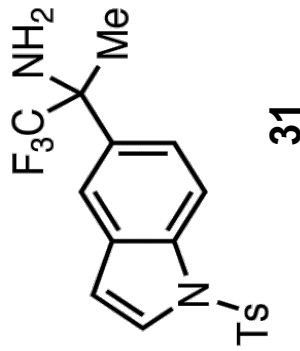

-74.11

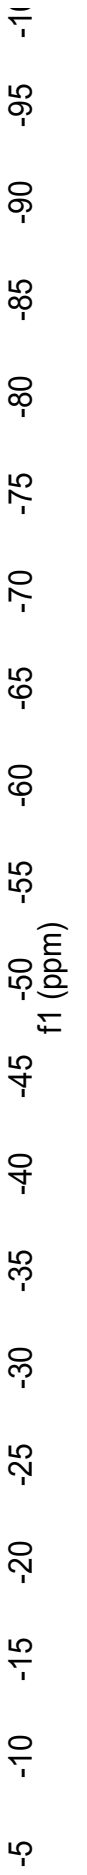

Supplement: NIHMS878244-supplement-Supporting_Information.pdf [file NIHMS878244-supplement-Supporting_Information.pdf]
